# Supplementary material for: Clinical significance and immune characteristics analysis of miR-221-3p and its key target genes related to epithelial-mesenchymal transition in breast cancer
Source: publisher site journal article supplement (doi:10.18632/aging.205370), 2024-01-06
Supplement: Supplementary file [file aging-v16i1-205370-supplementary-material-SD1.pdf]

## SUPPLEMENTARY FIGURE

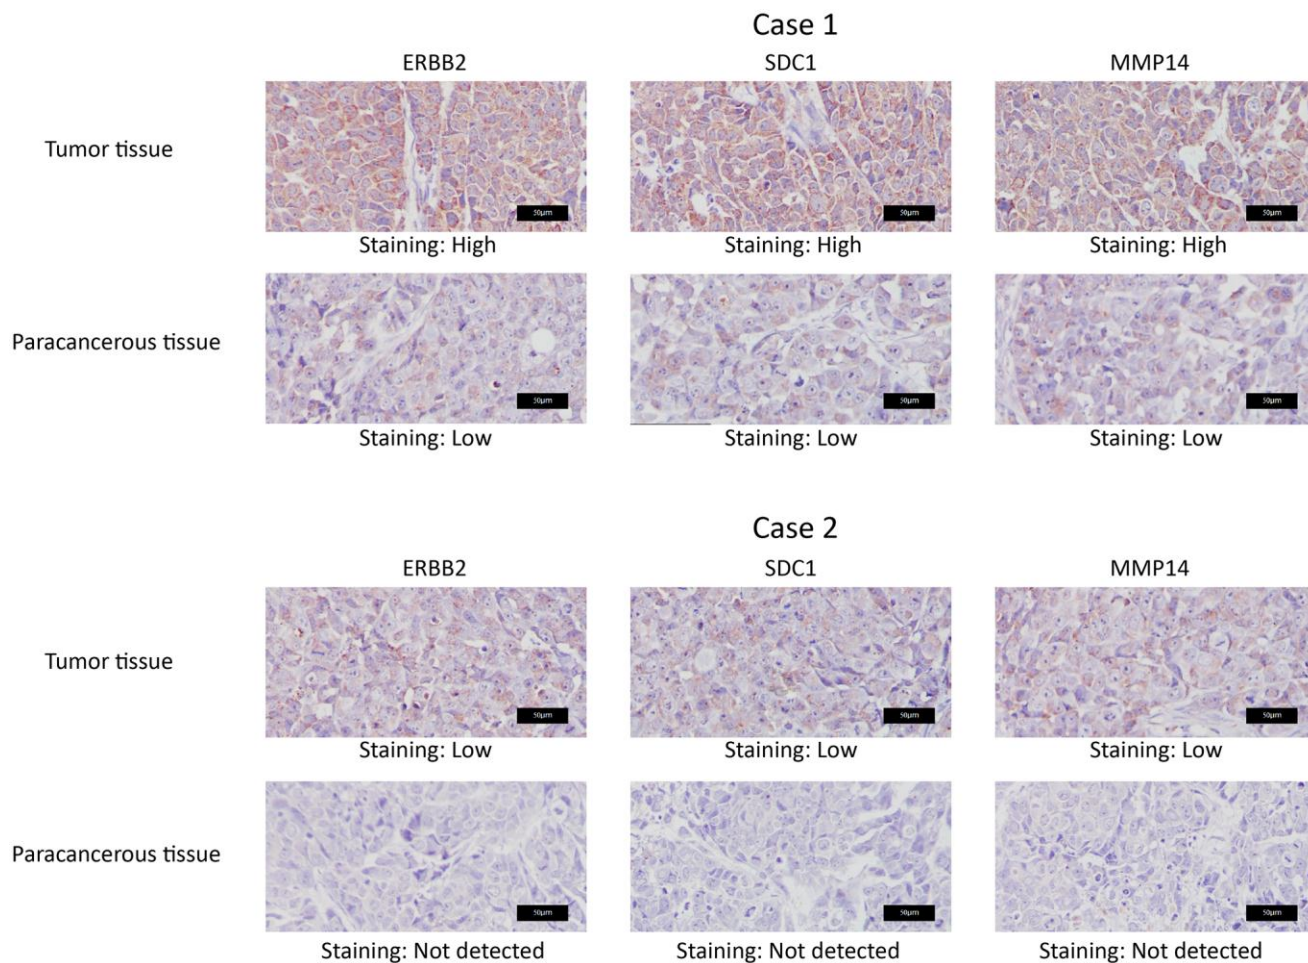

**Supplementary Figure 1. Representative images of 3 upregulated ETGs in BC tissues and their matched paracancerous tissues. Original magnifications 200×.**
