# Supplementary material for: Clinical significance and immune characteristics analysis of miR-221-3p and its key target genes related to epithelial-mesenchymal transition in breast cancer
Source: Aging (Albany NY). 2024 Jan 6;16(1):322–47. doi: 10.18632/aging.205370 (PMC10817385; doi:10.18632/aging.205370)
Supplement: Supplementary Table 1 [file aging-16-205370-s002.xlsx]

## Sheet: Supplement Table 1
Supplementary Table 1. The potential target genes of miR-222-3p obtained from the miRWalk 3.0 (n=2342).
mirnaid	refseqid	genesymbol	duplex	start	end	bindingp	energy	seed	accessibility	au	phylopstem	phylopflank	me	number_of_pairings	binding_region_length	longest_consecutive_pairings	position	validated	TargetScan	miRDB
hsa-miR-221-3p	NM_001308204	SSR3	AGCTACATTGTCTGCTGGGTTTC#AAACCCAGCAGAATGTAA#...(((((..((((((((((((.#))))))))))))))))).	651	669	0.953846	-23.7	0	0.117467	0.691	0.743229	0.639761	-8.81344	17	18	17	3UTR		0	0
hsa-miR-221-3p	NM_182905	WASHC1	AGCTACATTGTCTGCTGGGTTTC#GGAACCAGCAGTGTGTGGA#..((((((...(((((.((((((#))))))))))).)))))).	1647	1666	0.953846	-20.2	1	0.0044928	0.368	4.06678	1.76594	-10.0807	17	19	11	3UTR		0	0
hsa-miR-221-3p	NM_001030055	ARHGAP5	AGCTACATTGTCTGCTGGGTTTC#TCTGGCAGTCGGTGTAGA#..((((((((.((((((((....#)))))))).)))))))).	5243	5261	0.953846	-21.9	1	0.000734728	0.662	1.95586	2.42163	-7.78178	16	18	8	3UTR		0	0
hsa-miR-221-3p	NM_001261435	CDK15	AGCTACATTGTCTGCTGGGTTTC#CCCAGAGATAATGCTAGTA#.((((((((((((.(((((....#))))))))))))).)))).	3119	3138	0.961538	-21.7	1	0.028175	0.574	0.348133	0.310038	-4.65016	17	19	13	3UTR		0	0
hsa-miR-221-3p	NM_001270975	IST1	AGCTACATTGTCTGCTGGGTTTC#GCCCATGCAGCTGTAGTTG#(((((((..(.(((((((((...#))))).)))))))))))).	2117	2136	0.961538	-19.9	1	0.000440032	0.544	0.979778	2.39206	-10.1324	17	19	12	3UTR		0	0
hsa-miR-221-3p	NM_001278187	HERC4	AGCTACATTGTCTGCTGGGTTTC#GATTCATAATAACCTACTGGAGGACTTGGCCTGACAATGTAGTG#.(((((((((((.(((((((((.#.)))))))))..))))))))))).	1473	1517	0.961538	-25.3	1	0.0118536	0.618	5.55175	4.25848	-5.08246	20	24	11	3UTR		0	0
hsa-miR-221-3p	NM_001278628	CRNKL1	AGCTACATTGTCTGCTGGGTTTC#AAACTTAGTGGACAATGGAGTC#.(((.(((((((((((((((((.#))))))))))))))))).))).	3133	3155	0.961538	-23.9	0	9.53438e-05	0.662	4.07485	4.80874	-7.91236	20	22	17	3UTR		0	0
hsa-miR-221-3p	NM_001286565	KIAA0513	AGCTACATTGTCTGCTGGGTTTC#GGAGCCCAGTAGTGTTTCCAAGAACAGTGTGGA#..(((((((((((((((((((((#))))))))))))...........))))))))).	5881	5914	0.961538	-27.7	1	0.000430953	0.574	-0.059441	-0.0699794	-4.957	21	33	12	3UTR		0	0
hsa-miR-221-3p	NM_001290258	ASB15	AGCTACATTGTCTGCTGGGTTTC#AAGCTCAGCTCTTTCTCTCATGTTCTCCTGACCTATGTAGACAATTGGCC#.((((.(((((((((((((((..#.)))))).))))))))))))).	2897	2947	0.961538	-23	0	0.0128442	0.588	0	0	-5.69428	19	22	13	3UTR		0	0
hsa-miR-221-3p	NM_001297548	ZNF131	AGCTACATTGTCTGCTGGGTTTC#AAGCCTAACAGACAAGTGGA#..((((.(((((((.(((((((.#))))))).))))))))))).	2579	2599	0.961538	-21.4	0	0.0399168	0.588	0.259284	0.269778	-7.23614	18	20	11	3UTR		0	0
hsa-miR-221-3p	NM_001297598	MIER3	AGCTACATTGTCTGCTGGGTTTC#GATCCCTGCTCAATGTAGCA#.(((((((((...((.(((.((.#)).))).)).))))))))).	2160	2180	0.961538	-20	1	0.00153574	0.647	0	0	-11.4871	16	20	9	3UTR		1	1
hsa-miR-221-3p	NM_001300821	EIF4B	AGCTACATTGTCTGCTGGGTTTC#AGCTTGGTAGACAGTATTAGCG#.((((.(((((((((((((((..#)))))))))))))))..)))).	3287	3309	0.961538	-21.8	0	0.00117305	0.559	0	0	-5.69428	19	22	15	3UTR		0	0
hsa-miR-221-3p	NM_001300884	CHIC1	AGCTACATTGTCTGCTGGGTTTC#GATTCCCAACTTCAGCAGATGATAGCA#.((((..((((((((((((((..#.)))).)))))))))))))).	5661	5688	0.961538	-20	0	0.0150921	0.603	0	0	-7.23797	18	21	14	3UTR		0	0
hsa-miR-221-3p	NM_001304335	ZNF773	AGCTACATTGTCTGCTGGGTTTC#GAAATCTGGCAGATGGATGTTACACATATAGCA#.((((((((.(((((((((((((#)))))))))))))..))))).........))).	2905	2938	0.961538	-22.2	1	0.0033506	0.588	0	0	-5.03583	21	33	13	3UTR		0	0
hsa-miR-221-3p	NM_001308435	NME6	AGCTACATTGTCTGCTGGGTTTC#GAGACTACTGCTCAGGGCACAGCAGGCAGTGTGTTAGCC#.((((((((((((((((.((((.#.)))).)))))))))))))...))).	1975	2014	0.961538	-25.6	1	9.37063e-05	0.412	-0.0481495	0.0364612	-3.79332	20	26	13	3UTR		0	0
hsa-miR-221-3p	NM_031939	MRO	AGCTACATTGTCTGCTGGGTTTC#GGCAGACAGAGTGGCA#.(((((.(((((((((.......#))))))))).))))).	2418	2434	0.961538	-22.7	0	0.000209727	0.456	0	0	-5.33701	14	16	9	3UTR		0	0
hsa-miR-221-3p	NM_032514	MAP1LC3A	AGCTACATTGTCTGCTGGGTTTC#CCCAGCACCCCTGCTGTGTGGTTC#((((((((.((.(((((((....#))))))).....)).)))))))).	753	777	0.961538	-19.9	1	0.00197554	0.397	0.187906	-0.112401	-8.34077	17	24	8	3UTR		0	0
hsa-miR-221-3p	NM_032682	FOXP1	AGCTACATTGTCTGCTGGGTTTC#AAATCTGGTAGATTAGTTCATTCTCAGCATGTGTAGCTA#((((((((.(((((((((((((.#))))))))))))).................)))))))).	5178	5217	0.961538	-20.8	1	0.000114786	0.647	0	0	-4.99396	21	39	13	3UTR		1	0
hsa-miR-221-3p	NM_032826	SLC35B4	AGCTACATTGTCTGCTGGGTTTC#GATTCCCAGTGACAGTGCAGCA#.(((.(((((((.((((((..((#))..))))))))))))).))).	1747	1769	0.961538	-25.8	0	0.00123836	0.485	0	0	-9.20149	18	22	13	3UTR		0	0
hsa-miR-221-3p	NM_079834	SCAMP4	AGCTACATTGTCTGCTGGGTTTC#GAGGCCTGACTCCGGGGGACAGGTGGCA#.(((((.((((((.(((((((..#.))).)))).))))))))))).	1087	1115	0.961538	-25	0	1.71681e-05	0.279	1.58341	1.74904	-6.19385	18	22	11	3UTR		0	0
hsa-miR-221-3p	NM_138718	SLC26A8	AGCTACATTGTCTGCTGGGTTTC#GAAATAAGGGGTCAGATAATGCTGGCA#.(((((((((((((((..(((((#)))))....)).))))))))).)))).	2923	2950	0.961538	-19.9	1	0.00101292	0.559	0.696028	0.86819	-3.79332	20	27	9	3UTR		0	0
hsa-miR-221-3p	NM_139034	MAPK7	AGCTACATTGTCTGCTGGGTTTC#GGACCCAGCAGGTGAGGCTC#((((.(((...(((((((((((.#)))))))))))))).)))).	2579	2599	0.961538	-23.3	0	2.61793e-05	0.471	3.63235	3.47618	-13.1803	18	20	14	3UTR		0	0
hsa-miR-221-3p	NM_139178	ALKBH3	AGCTACATTGTCTGCTGGGTTTC#GAAAGCCAGCAACTCATGTTGGTA#.(((((((.((.((((((.((((#)))).))))))))..)))).))).	1427	1451	0.961538	-19.3	1	3.88121e-05	0.574	0	0	-8.19652	19	24	8	3UTR		0	0
hsa-miR-221-3p	NM_144974	CCDC122	AGCTACATTGTCTGCTGGGTTTC#GCCATAGGGCAATGTGGA#..(((((((((((....(((...#)))...))))))))))).	1135	1153	0.961538	-18.6	1	1.19997e-05	0.588	-0.0431814	0.470646	-6.78234	14	18	11	3UTR		0	0
hsa-miR-221-3p	NM_144984	VSTM4	AGCTACATTGTCTGCTGGGTTTC#AAACCCAGGAGGCAAAGGCTG#((((...((((((.((((((((.#)))))))).)))))).)))).	2118	2139	0.961538	-24.9	0	0.000148585	0.471	3.89672	3.46099	-12.3581	18	21	8	3UTR		0	0
hsa-miR-221-3p	NM_148898	FOXP2	AGCTACATTGTCTGCTGGGTTTC#AAACCTAGTGGGCTTAAGGCTTATATTCTATGTGGTTG#((((((((.(((((((((((((.#)))))))))))))................)))))))).	5934	5972	0.961538	-21.3	1	0.00572418	0.618	0	0	-4.99396	21	38	13	3UTR		1	0
hsa-miR-221-3p	NM_170744	UNC5B	AGCTACATTGTCTGCTGGGTTTC#CCCAGTGGGCAGGGTTGCC#.((.((.((((((((((((....#)))))))))))).)).)).	4876	4895	0.961538	-22.5	0	2.48619e-05	0.441	0	0	-8.36903	16	19	12	3UTR		0	0
hsa-miR-221-3p	NM_172359	CD46	AGCTACATTGTCTGCTGGGTTTC#GAAGCCAGCAGGCGAAAAGCA#.(((...(((((((((((.(((.#))).)))))))))))..))).	2554	2575	0.961538	-23.9	0	6.15558e-05	0.529	0.381431	-0.502565	-11.357	17	21	11	3UTR		0	0
hsa-miR-221-3p	NM_176894	P2RY13	AGCTACATTGTCTGCTGGGTTTC#GAGACTTCCGTAGATAATGTGGA#..(((((((((((((.(((((((#)))))))..))))))))))))).	1120	1143	0.961538	-23.1	1	0.00116974	0.721	0	0	-5.19005	20	23	13	3UTR		0	0
hsa-miR-221-3p	NM_181654	CPLX4	AGCTACATTGTCTGCTGGGTTTC#GAAACCAGGCAGACGGCTGCTC#(((....(((((((((.((((((#)))))).)))))))))..))).	1382	1404	0.961538	-22.4	0	2.00186e-05	0.515	0	0	-14.5333	18	22	9	3UTR		0	0
hsa-miR-221-3p	NM_198204	MLX	AGCTACATTGTCTGCTGGGTTTC#GTACACAAGCCCAGCAGGTCCTGAGTGAAGCC#.(((.(((((((((((((((((.#.)))))))))))).)...)))).))).	1669	1701	0.961538	-24.3	0	0.000397189	0.426	4.7979	4.64566	-7.91236	20	27	12	3UTR		0	0
hsa-miR-221-3p	NM_198557	RBM43	AGCTACATTGTCTGCTGGGTTTC#GAAAACCAGCAGATAT#........((((((((((..(((#)))..)))))))))).	3723	3739	0.961538	-19.4	0	0.429429	0.706	0	0	-19.4239	13	16	10	3UTR		0	0
hsa-miR-221-3p	XM_005254673	PEAK1	AGCTACATTGTCTGCTGGGTTTC#GACCCAGTAGACTCTGA#.....((..((((((((((((..#))))))))))))..)).	6185	6202	0.961538	-22.2	0	0.00250027	0.544	0	0	-17.0356	14	17	12	3UTR		0	0
hsa-miR-221-3p	XM_011518763	CERCAM	AGCTACATTGTCTGCTGGGTTTC#GGACCCTTGCAGACATGTTGCC#.((.(((.(((((((.((((((.#))))))..)))))))))).)).	3286	3308	0.961538	-23.7	0	0.000149485	0.471	0	0	-9.37203	18	22	10	3UTR		0	0
hsa-miR-221-3p	XM_011531181	EOLA2	AGCTACATTGTCTGCTGGGTTTC#CCAGCAGACAACCCCGGGATGCAGCC#.(((.(((((((((((((.....#))))))))))........))).))).	6745	6771	0.961538	-21.8	0	0.000397016	0.441	0	0	-7.91236	16	26	10	3UTR		0	0
hsa-miR-221-3p	XM_024452480	EOLA1	AGCTACATTGTCTGCTGGGTTTC#CCAGCAGACAACCCCGGGATGCAGCC#.(((.(((((((((((((.....#))))))))))........))).))).	6738	6764	0.961538	-21.8	0	0.000397016	0.441	0	0	-7.91236	16	26	10	3UTR		0	0
hsa-miR-221-3p	NM_015683	ARRDC2	AGCTACATTGTCTGCTGGGTTTC#GGAGCTCAGCAGGCAG#........(((((((((((((((#))))))))))))))).	1812	1828	0.961538	-23.8	0	0.000204014	0.5	0.516086	0.416276	-19.4239	15	16	15	3UTR		0	0
hsa-miR-221-3p	NM_017552	ATAD2B	AGCTACATTGTCTGCTGGGTTTC#AGATGTAGCAGATTTTTTGTAGCA#.((((((..((((((((.((((.#)))).))))))))....)))))).	6759	6783	0.961538	-23.2	1	0.000445636	0.691	5.76353	5.44126	-7.16335	18	24	8	3UTR		1	1
hsa-miR-221-3p	NM_017664	ANKRD10	AGCTACATTGTCTGCTGGGTTTC#GAAGCTTTGCAGATCACCATGTGGTTG#(((((((((((((((.(((((((#))))))).))))).))..)))))))).	1915	1942	0.961538	-22.3	1	0.000386083	0.559	3.7093	4.81951	-4.17062	22	27	8	3UTR		0	1
hsa-miR-221-3p	NM_018837	SULF2	AGCTACATTGTCTGCTGGGTTTC#AGGCAATGAAAAACCATGTGGGTGATTTCCAGCAGACCTGTGGTA#.((((((..((((((((((..((#.))..)))))))))).)))))).	3026	3071	0.961538	-24.9	1	0.00265547	0.485	3.42417	5.0328	-7.16335	18	23	10	3UTR		0	0
hsa-miR-221-3p	NM_020463	PPP4R3B	AGCTACATTGTCTGCTGGGTTTC#AAAGTCAGCATGCAGCACATGTAGCTT#(((((((((((.((((((.(((.#))).)))))).)))....)))))))).	3594	3621	0.961538	-21.2	1	0.000188088	0.603	5.13645	5.32655	-7.28438	20	27	8	3UTR		0	0
hsa-miR-221-3p	NM_020733	HEG1	AGCTACATTGTCTGCTGGGTTTC#GAGGCTCAGCAGGCAGATTGCAGGCA#.(((.((((((((((((((((((#))))))))))))))))..))..))).	5036	5062	0.961538	-26.3	0	0.0020998	0.426	4.65754	4.68488	-7.91236	21	26	16	3UTR		1	0
hsa-miR-221-3p	NM_020768	KCTD16	AGCTACATTGTCTGCTGGGTTTC#GGTTTATGTCAGCTCAGTGGATAATGTGCG#.((.(((((((((((((((((..#.))))))))))))))))))).	7990	8020	0.961538	-25.4	0	0.000517105	0.574	-0.118161	-0.434165	-6.82535	19	21	19	3UTR		0	0
hsa-miR-221-3p	NM_021642	FCGR2A	AGCTACATTGTCTGCTGGGTTTC#GAAAGCCACAGACAATATGGTC#.((((.((((((((.(((.((((#)))).))))))))))).)))).	2048	2070	0.961538	-22.1	0	0.00776021	0.485	0.0559272	-0.0200373	-6.42973	19	22	11	3UTR		0	0
hsa-miR-221-3p	NM_021784	FOXA2	AGCTACATTGTCTGCTGGGTTTC#GAGACTTTGGGGAGACGGTGTTGCA#.((.(((((((((.(((((((((#)))))))..)).))))))))).)).	1759	1784	0.961538	-22.7	0	0.000631399	0.471	4.45205	4.86538	-7.68219	20	25	9	3UTR		0	0
hsa-miR-221-3p	NM_021815	SLC5A7	AGCTACATTGTCTGCTGGGTTTC#TCAGCAAGCTTGTAGCTG#(((((((..((.((((((.....#)))))).)).))))))).	4964	4982	0.961538	-19.2	1	9.91797e-05	0.618	0.348406	0.315091	-10.6544	15	18	7	3UTR		0	0
hsa-miR-221-3p	NM_024301	FKRP	AGCTACATTGTCTGCTGGGTTTC#CCCACTTGCACGGCAGTGTAGA#..(((((((((((((((((....#))))...))).)))))))))).	2831	2853	0.961538	-22.4	1	2.05491e-05	0.5	-0.0543849	-0.0547221	-4.957	17	22	10	3UTR		0	0
hsa-miR-221-3p	NM_001812	CENPC	AGCTACATTGTCTGCTGGGTTTC#GGATTACAGGTGTGAGCCACTGTGCCCAGCTTAAGTGTAGCC#.((((((((....(((((((...#.)))))))...)))))))).	5265	5307	0.961538	-24.9	1	0.00470971	0.544	2.05749	1.50987	-12.4965	15	20	8	3UTR		0	0
hsa-miR-221-3p	NM_002055	GFAP	AGCTACATTGTCTGCTGGGTTTC#GAGACTCAGACAGGAAAGGGAAGGCCCCACAGACAAGGTAGCC#.(((((.(((((((..((((((.#.))))))..))))))).))))).	1756	1799	0.961538	-25.7	0	0.00185014	0.456	0	0	-6.30551	18	23	7	3UTR		0	0
hsa-miR-221-3p	NM_002367	MAGEB4	AGCTACATTGTCTGCTGGGTTTC#GAGAGCCAGAGACAGTGTTGCA#.((.(((((((((.((((.((((#)))).))))))))))))).)).	1718	1740	0.961538	-26.5	0	0.0188212	0.485	0	0	-7.68219	19	22	13	3UTR		0	0
hsa-miR-221-3p	NM_002639	SERPINB5	AGCTACATTGTCTGCTGGGTTTC#GAAGTCCTTATGTTAAGCCCTGGCAGGCAGGTGTT#....((((((((((((((((((.#.)))))).))))))))).))).	1725	1760	0.961538	-22.4	0	0.000294182	0.603	0	0	-9.54656	18	22	9	3UTR		0	0
hsa-miR-221-3p	NM_002688	SEPTIN5	AGCTACATTGTCTGCTGGGTTTC#GACGCCTAGCGGGCAGGGTTGGGCTG#((((((.(((((((((((((.((#)).))))))))))))).))..)))).	1673	1699	0.961538	-26	0	3.65785e-05	0.412	0	0	-5.48126	21	26	13	3UTR		0	0
hsa-miR-221-3p	NM_003411	ZFY	AGCTACATTGTCTGCTGGGTTTC#TTCAGCAGACAAAATGTAC#...((((((((((((((((....#)))))))))))..))))).	3381	3400	0.961538	-19.6	0	0.0161374	0.735	0.870518	0.76266	-6.51454	16	19	11	3UTR		0	0
hsa-miR-221-3p	NM_004226	STK17B	AGCTACATTGTCTGCTGGGTTTC#GAGCCCCTGTGAGTGGACAAATGTCAGTA#.(((((((((((((((((((((.#)))))).....))))))))).))).))).	4030	4059	0.961538	-20.2	1	0.00121406	0.574	0.841464	1.84052	-3.79332	21	29	9	3UTR		0	0
hsa-miR-221-3p	NM_004323	BAG1	AGCTACATTGTCTGCTGGGTTTC#AGACCTCAGACAAGGTAGTA#.(((((.(((((((..((((((.#))))))))))))).))))).	2682	2702	0.961538	-20.9	0	0.000599814	0.471	0.134646	0.109658	-6.30551	18	20	13	3UTR		0	0
hsa-miR-221-3p	NM_004612	TGFBR1	AGCTACATTGTCTGCTGGGTTTC#GAAATCCAGGGGACCAATGC#.....((((((((.(((((((((#))))))))).)))).)))).	3755	3775	0.961538	-22.1	0	0.023994	0.676	3.20164	1.33968	-14.5224	17	20	9	3UTR		0	0
hsa-miR-221-3p	NM_005032	PLS3	AGCTACATTGTCTGCTGGGTTTC#GAAAAGTGATGTAATCTGGTAGCAATGTAGTA#.(((((((((.((((((((((..#.))))))))))))))))))).	3040	3072	0.961538	-23.6	1	0.0302243	0.721	2.4614	2.7206	-6.6181	19	21	19	3UTR		0	0
hsa-miR-221-3p	NM_005737	ARL4C	AGCTACATTGTCTGCTGGGTTTC#GAAACTCAGTAGAGAAAGTCTAGCTA#((((((.((.(((((((((((((#))))))))))))).)).))..)))).	3142	3168	0.961538	-24.7	0	0.00764392	0.618	3.75581	4.86243	-6.72377	21	26	13	3UTR		0	0
hsa-miR-221-3p	NM_006978	RNF113A	AGCTACATTGTCTGCTGGGTTTC#GACAGAGCAGGCGGGTGGTG#.(((((.(((((((((..(((..#)))..)))))))))))))).	1236	1256	0.961538	-19.9	0	0.160498	0.476	0	0	-5.33701	17	20	14	3UTR		0	0
hsa-miR-221-3p	NM_007222	ZHX1	AGCTACATTGTCTGCTGGGTTTC#TCCAAAATGCTGCAATGTAGCTG#(((((((((((..((((((....#))))....)).))))))))))).	4409	4432	0.961538	-20	1	0.000108331	0.603	2.66815	3.15344	-8.57351	17	23	11	3UTR		0	0
hsa-miR-221-3p	NM_001330177	PCNX4	AGCTACATTGTCTGCTGGGTTTC#GAAGATAACTCTTTAAAATTATTTGTGGCCAGGCAGGCACTGTGGCTC#(((((((.((((((((.((((..#.)))).)))))))).))))))).	15218	15266	0.961538	-27.4	1	2.64219e-07	0.5	0	0	-6.25121	19	23	8	3UTR		0	0
hsa-miR-221-3p	NM_001331030	PDXK	AGCTACATTGTCTGCTGGGTTTC#GTCCCTGCAGGACCCAGCAGGCATCGTGGCG#.(((((..((((((((((((((.#.))))))))))))))..))))).	5562	5593	0.961538	-33.4	0	6.69403e-06	0.324	0	0	-7.65065	19	23	14	3UTR		0	0
hsa-miR-221-3p	NM_001349544	GRAMD2B	AGCTACATTGTCTGCTGGGTTTC#GAATTGGTTACATCGTTTGTATCTGTTGGCCTAGTGGACAGCTGTGCC#.((.(((((((((((((((((..#.)))))))))))))).))))).	2648	2696	0.961538	-23.6	0	2.10012e-05	0.544	0	0	-6.82535	19	22	14	3UTR		0	0
hsa-miR-221-3p	NM_001363537	CCNC	AGCTACATTGTCTGCTGGGTTTC#GAAGATACTAGCCCAGCCTAGCAGAAAAGTGCAATATGTATAGCA#.((((((((.(((((((((((..#.)))))))))))..)))).........)))).	1657	1702	0.961538	-22.1	1	0.00114795	0.632	0	0	-5.03583	19	32	11	3UTR		0	0
hsa-miR-221-3p	NM_001367860	NEU3	AGCTACATTGTCTGCTGGGTTTC#GAGGCCTAGGCTAGAGAGATGGTGTAGGTG#(.(((((((((((((((((((((#))))))))).).....))))))))))).).	4233	4263	0.961538	-22.3	1	0.0355898	0.5	0	0	-5.10125	22	30	11	3UTR		0	0
hsa-miR-221-3p	NM_001382309	ATXN7L3	AGCTACATTGTCTGCTGGGTTTC#AAGCCCTGCTGAGGGGCAATGTGGCG#.((((((((((((((.((((((.#)))))).))....)))))))))))).	1849	1875	0.961538	-27.4	1	2.49698e-05	0.368	0	0	-4.02637	20	26	12	3UTR		0	0
hsa-miR-221-3p	NM_000191	HMGCL	AGCTACATTGTCTGCTGGGTTTC#GAAGCCCTGGGGATGATGTGGA#..(((((((((((.(.(((((((#))))))).).))))))))))).	1007	1029	0.961538	-26.6	1	0.000530519	0.441	4.36006	4.19339	-6.04689	19	22	11	3UTR		0	0
hsa-miR-221-3p	NM_000926	PGR	AGCTACATTGTCTGCTGGGTTTC#GAAAGCCAGGTCTAGATAATCAGTGGCC#.(((((((((((((((((.((((#)))).))))...))))))))..))))).	10191	10219	0.961538	-21.6	1	0.00242603	0.588	4.25635	3.46177	-3.79332	21	28	8	3UTR		0	0
hsa-miR-221-3p	NM_001009554	MFAP3L	AGCTACATTGTCTGCTGGGTTTC#GAGCTCAGCTGAGATGTAGA#..(((((((.((.(((((((((.#))))))))).))))))))).	1836	1856	0.961538	-21.3	1	0.0107253	0.588	0.83341	0.765821	-7.48864	18	20	9	3UTR		0	0
hsa-miR-221-3p	NM_001013355	OR2G6	AGCTACATTGTCTGCTGGGTTTC#GGCCCCAGGGCAAAAGATGTGGCA#.((((((((...(((((((((..#)))))...))))...)))))))).	3319	3343	0.961538	-21.3	1	0.0048326	0.588	0	0	-11.2074	17	24	8	3UTR		0	0
hsa-miR-221-3p	NM_001039802	CDC42	AGCTACATTGTCTGCTGGGTTTC#AAGCCCATCAGATTAATGTGCC#.((.((((((((((.(((((((.#))))))).))))).))))))).	7908	7930	0.961538	-21.2	0	0.0012811	0.603	9.43091e-05	0.107423	-7.5608	19	22	7	3UTR		0	0
hsa-miR-221-3p	NM_001077427	LYPD1	AGCTACATTGTCTGCTGGGTTTC#AAACTTAGCCAGGCATGGTGGTA#.(((((..((((((((((((((.#))))))))).)))))..))))).	3076	3099	0.961538	-23.4	0	0.000135572	0.603	4.5968	4.38366	-7.65065	19	23	9	3UTR		0	0
hsa-miR-221-3p	NM_001113528	METTL15	AGCTACATTGTCTGCTGGGTTTC#GGCGGGCATGGTGGCTC#((((((..((((((((.......#))))))))..)))))).	3373	3390	0.961538	-21.6	0	6.86173e-06	0.441	-0.541737	-0.0478228	-7.7949	14	17	8	3UTR		0	0
hsa-miR-221-3p	NM_001127215	GFI1	AGCTACATTGTCTGCTGGGTTTC#GATTTCTGAGCTAGCAGGCATGTGGG#..(((((.((((((((((.((..#.)).))))))))))))))).	2513	2539	0.961538	-23.6	0	0.00146282	0.574	0.0556965	0.065795	-7.27064	17	20	15	3UTR		0	0
hsa-miR-221-3p	NM_001127593	FCGR3A	AGCTACATTGTCTGCTGGGTTTC#GGAATTCAGTGGGACCAATGAAAGCA#.(((.((((((((((((((((((#)))))))))))))..)))))..))).	1373	1399	0.961538	-19.9	0	0.0164598	0.5	0.900124	0.14241	-7.91236	21	26	13	3UTR		0	0
hsa-miR-221-3p	NM_001130064	GAP43	AGCTACATTGTCTGCTGGGTTTC#GAAAGATCCCAAGTCAAACAGTGTGGCTT#(((((((((((.(((((((.((.#.)).)))).).)).))))))))))).	1479	1508	0.961538	-22.2	1	0.000861048	0.662	5.45948	4.52722	-7.28438	20	26	11	3UTR		0	0
hsa-miR-221-3p	NM_001136004	MICAL3	AGCTACATTGTCTGCTGGGTTTC#GAACCCAGGAGGCAGAGGTTGCA#.((.((.((((((.((((((((.#)))))))).))))))..)).)).	5596	5619	0.961538	-24.9	0	0.000348122	0.426	3.81802	2.7463	-9.22587	18	23	8	3UTR		0	0
hsa-miR-221-3p	NM_001166295	SSX2IP	AGCTACATTGTCTGCTGGGTTTC#GACCTGCAAAGCAGTGTAGG#..(((((((((.(((.(((((..#))))))))..))))))))).	5428	5448	0.961538	-19.5	1	1.29946e-05	0.632	3.72448	3.32163	-8.53685	17	20	9	3UTR	MIRT053145	0	0
hsa-miR-221-3p	NM_001193338	FCMR	AGCTACATTGTCTGCTGGGTTTC#CCCATTTCTTAGCCAGTTCCAGACAATGTATAGCA#.(((((((((((((((((.(...#.).))))...))))))))))..))).	1963	1998	0.961538	-22	1	0.012729	0.515	0.417653	0.990151	-3.79332	18	26	10	3UTR		0	0
hsa-miR-221-3p	NM_001193416	DDX3X	AGCTACATTGTCTGCTGGGTTTC#GTCAAATTAAGCAGACCCGGCGTTGGCAGTGTAGCC#.(((((((((((((((((((((.#.))))))))))..))))))))))).	4059	4095	0.961538	-31.9	1	3.35227e-05	0.618	6.00551	5.70403	-3.79332	21	25	11	3UTR		0	0
hsa-miR-221-3p	NM_001204478	TVP23C-CDRT4	AGCTACATTGTCTGCTGGGTTTC#GAGATGTAGAGGATGAGATGTAGTA#.((((((((((((.(((.(((((#))))).))).))))..)))))))).	2425	2450	0.961538	-19.6	1	0.000102918	0.603	5.70272	4.50729	-4.65016	20	25	8	3UTR		0	0
hsa-miR-221-3p	NM_001256172	ZNF85	AGCTACATTGTCTGCTGGGTTTC#GGAACCTGGTGGGAGATGTTTAGATCATGGGGCA#.((((((((.(((((((((((((#))))))))))))).)))))...........))).	850	884	0.961538	-20.6	1	0.0129142	0.559	0	0	-5.03583	21	34	13	3UTR		0	0
hsa-miR-221-3p	NM_033624	FBXO21	AGCTACATTGTCTGCTGGGTTTC#CCCAGCTGCAAAGACAATGTTGCTC#(((.(((((((((((((((....#)))))).....))))))))).))).	2067	2092	0.969231	-25.2	0	0.0234553	0.529	0	0	-6.9696	18	25	9	3UTR		0	0
hsa-miR-221-3p	NM_022131	CLSTN2	AGCTACATTGTCTGCTGGGTTTC#GGGCCTGGCAGAGTGTGGA#..((((((..((((((((((((.#)))))))))))))))))).	10005	10024	0.969231	-22.5	1	0.00038003	0.412	0	0	-7.2559	18	19	18	3UTR		0	0
hsa-miR-221-3p	NM_001941	DSC3	AGCTACATTGTCTGCTGGGTTTC#CCCATGCAGGAGTGTGCTC#(((.(((((.(((((((((....#)))).))))))))))))).	6369	6388	0.969231	-19.8	0	0.00062012	0.544	2.08009	1.54962	-8.2121	17	19	13	3UTR		0	0
hsa-miR-221-3p	NM_001164496	CFAP44	AGCTACATTGTCTGCTGGGTTTC#AAACACAAGTAGACCAGCAGGGTGTGGCA#.(((((((..((((((.(((((.#.)))))))))))))))))).	8057	8086	0.969231	-22.7	1	0.000676725	0.441	1.57359	0.766346	-6.09222	18	20	18	3UTR		0	0
hsa-miR-221-3p	NM_001271814	PLA2G2D	AGCTACATTGTCTGCTGGGTTTC#CCCAGTTGAGGCAGTAGCTG#((((((..(((((((((((....#))))))..))))))))))).	536	556	0.974359	-22.2	0	2.78484e-05	0.456	0	0	-7.7949	17	20	11	3UTR		0	0
hsa-miR-221-3p	NM_001286704	UFM1	AGCTACATTGTCTGCTGGGTTTC#CCACAGACATAGTAGTG#.(((((..((((((.(((.....#)))))))))..))))).	2860	2877	0.974359	-18.5	0	0.00985691	0.618	0	0	-8.3861	14	17	9	3UTR		0	0
hsa-miR-221-3p	NM_001291932	SEC14L2	AGCTACATTGTCTGCTGGGTTTC#ACTCGGTAGACAGGCTGGCC#.((((..(((((((((((((...#)))))))))))))..)))).	1795	1815	0.974359	-22.5	0	4.08625e-05	0.456	0.399921	-0.0939877	-7.23797	17	20	13	3UTR		0	0
hsa-miR-221-3p	NM_001293	CLNS1A	AGCTACATTGTCTGCTGGGTTTC#AAGCTAGCAGATCTATGTGGTG#.(((((((.(((((((((.((..#)).)))))))))..))))))).	1110	1132	0.974359	-22.4	1	0.00020145	0.529	2.63541	1.86544	-4.84971	18	22	9	3UTR		0	0
hsa-miR-221-3p	NM_001301098	ZBTB44	AGCTACATTGTCTGCTGGGTTTC#AGCCCGGCAGCAAGGAAGTC#.(((.(.(((.((((((((((..#))))))))))))).).))).	6517	6537	0.974359	-21.3	0	0.000107798	0.456	0	0	-12.2808	17	20	13	3UTR		0	0
hsa-miR-221-3p	NM_033064	ATCAY	AGCTACATTGTCTGCTGGGTTTC#CTGAGCAGACGGTGAGTA#.(((.(((((((((((.((....#)).)))))))))))))).	3286	3304	0.974359	-22.7	0	1.70898e-05	0.471	0	0	-7.91236	16	18	14	3UTR		0	0
hsa-miR-221-3p	NM_152376	UBXN10	AGCTACATTGTCTGCTGGGTTTC#GGGACCCAGCCAACAGCCTTCAAGGCAGGGCA#.(((...((((((((((((((((#))))))))))............))))))))).	3919	3951	0.974359	-21.6	0	1.49564e-07	0.441	0	0	-11.357	19	32	10	3UTR		0	0
hsa-miR-221-3p	NM_152924	ABHD2	AGCTACATTGTCTGCTGGGTTTC#CCCAGGCCAGAGTGTGGCTT#((((((((..(((((((((....#)))))..)))))))))))).	1980	2000	0.974359	-21.2	1	4.08009e-06	0.485	-1.11002	-0.240536	-6.23647	17	20	12	3UTR		0	0
hsa-miR-221-3p	NM_173793	C22orf39	AGCTACATTGTCTGCTGGGTTTC#TCCAGCATGGCTGTGGCTG#(((((((..((((((((((....#))))))).)))))))))).	1625	1644	0.974359	-22.6	1	2.91367e-05	0.485	0.187986	-0.100679	-7.3076	17	19	10	3UTR		0	1
hsa-miR-221-3p	XM_005255760	CDH8	AGCTACATTGTCTGCTGGGTTTC#GAACTGAGCAGACAGTGTTTTTAAAGCA#.(((((((((((((((.(((((.#))))).))))))))))))......))).	3456	3484	0.974359	-27	1	0.0003636	0.632	0	0	-3.79332	20	28	12	3UTR		0	0
hsa-miR-221-3p	XM_011533045	REEP1	AGCTACATTGTCTGCTGGGTTTC#CCCTGCAGGAGTGTGGTC#.((((((((.(((((.(((....#))).))))))))))))).	1460	1478	0.974359	-21.4	1	3.30016e-06	0.603	0	0	-5.26888	16	18	13	3UTR		0	0
hsa-miR-221-3p	XM_011544411	ADRA1A	AGCTACATTGTCTGCTGGGTTTC#GAGCCCACTAGTTCCAGAGGCAGTGTGCTG#(((.(((((((((.(((((....#.))))))))))))))))).	2513	2543	0.974359	-22.1	0	1.88006e-07	0.5	0	0	-7.82644	17	19	17	3UTR		0	0
hsa-miR-221-3p	NM_016076	DESI2	AGCTACATTGTCTGCTGGGTTTC#GACCCACAGCAATAGAGCA#.(((..((((.(((.((((((..#)))))))))))))..))).	3419	3438	0.974359	-19.2	0	0.0125664	0.5	0.498333	1.7593	-13.3735	16	19	13	3UTR		0	0
hsa-miR-221-3p	NM_016441	CRIM1	AGCTACATTGTCTGCTGGGTTTC#AACTGCAGTAGGCAGTGAGG#..((.((((((((((((((((..#)))).)))))))))))))).	4209	4229	0.974359	-20.5	0	0.000345597	0.544	1.69487	1.55106	-9.07604	18	20	14	3UTR		0	0
hsa-miR-221-3p	NM_018086	FIGN	AGCTACATTGTCTGCTGGGTTTC#ACAGAGCAGGCTGTAGCTT#(((((((..(((((((..((...#))..)))))))))))))).	4320	4339	0.974359	-20.1	1	6.7034e-05	0.471	0	0	-7.3076	16	19	14	3UTR		1	0
hsa-miR-221-3p	NM_003324	TULP3	AGCTACATTGTCTGCTGGGTTTC#GAGGCTTTGGGGAGGATCAGCCAGCAGACATGAGCACTGCTGGCCCGTGTGGCA#.(((((((((((((((((.(...#.).))))))))))................))))))).	2290	2344	0.974359	-26.5	1	0.000185428	0.397	-0.0992371	-0.255387	-3.79332	18	37	10	3UTR		0	0
hsa-miR-221-3p	NM_006218	PIK3CA	AGCTACATTGTCTGCTGGGTTTC#CTCAGCAGGCAAA#.......((((((((((((....#)))))))))))).	3588	3601	0.974359	-19.2	0	0.00719987	0.559	2.28808	1.99096	-17.1102	12	13	12	3UTR		0	0
hsa-miR-221-3p	NM_006914	RORB	AGCTACATTGTCTGCTGGGTTTC#AGCCCAGGGGCAAGCTGGCC#.((((..((((((.(((((((..#)))))))))))))..)))).	6780	6800	0.974359	-21.8	0	1.60115e-05	0.456	0	0	-8.09481	17	20	13	3UTR		0	1
hsa-miR-221-3p	NM_001387455	TTLL3	AGCTACATTGTCTGCTGGGTTTC#GAAAGGTGGGCCTCGACCTGTGACTCACACCCAGTGGACAGTGCTGAGCA#.(((.(((((((((((((((...#.)))))))))))))))...))).	2068	2118	0.974359	-28.1	0	2.69798e-06	0.353	0	0	-7.91236	18	23	15	3UTR		0	0
hsa-miR-221-3p	NM_001094	ASIC2	AGCTACATTGTCTGCTGGGTTTC#GGAACCCATGGGACTCTCTGCTA#(((......((((..((((((((#))))))))..)))).....))).	2220	2243	0.974359	-19.6	0	0.000174573	0.544	0	0	-19.4956	15	23	8	3UTR		0	0
hsa-miR-221-3p	NM_001098482	CRTC1	AGCTACATTGTCTGCTGGGTTTC#GCAGGCAGAGGGTGTAGCC#.((((((((.((((((..((...#)).)))))).)))))))).	4971	4990	0.974359	-22.9	1	3.31776e-05	0.412	0	0	-5.03583	16	19	8	3UTR		0	0
hsa-miR-221-3p	NM_001164440	ANKRD33B	AGCTACATTGTCTGCTGGGTTTC#ACCTAGCGGGCACGTTGCC#.((.((..((((((((((((...#)))))))))))).)).)).	2102	2121	0.974359	-21.6	0	3.37075e-06	0.485	0	0	-10.6827	16	19	12	3UTR		0	0
hsa-miR-221-3p	NM_001198793	ARPC4-TTLL3	AGCTACATTGTCTGCTGGGTTTC#GAAAGGTGGGCCTCGACCTGTGACTCACACCCAGTGGACAGTGCTGAGCA#.(((.(((((((((((((((...#.)))))))))))))))...))).	2533	2583	0.974359	-28.1	0	2.69798e-06	0.353	1.61726	0.444213	-7.91236	18	23	15	3UTR		0	0
hsa-miR-221-3p	NM_001365053	C9orf85	AGCTACATTGTCTGCTGGGTTTC#GGAGCCACTAAGGCAGGCCAAAATGGCTCAGCAGGCAAAGGTCCAAGCTG#((((((.((((((((((((((..#.))))))))))))))..))...)))).	2303	2353	0.974359	-25.2	0	0.000233173	0.456	0	0	-5.48126	20	27	14	3UTR		0	0
hsa-miR-221-3p	NM_001164803	RBMX	AGCTACATTGTCTGCTGGGTTTC#GACCTAGCAGATGTGTGGA#..(((((.(((((((((((((..#)))))))))))))))))).	1809	1828	0.974359	-24.9	0	0.00462935	0.603	0	0	-7.27064	18	19	18	3UTR		0	0
hsa-miR-221-3p	NM_001135750	PSMG4	AGCTACATTGTCTGCTGGGTTTC#GGGCTGAGCAGATAACTGGGCA#.(((...(((((((((.(((((.#))))).)))))))))...))).	2334	2356	0.978022	-21.6	0	0.00169611	0.353	-0.198212	-0.506671	-11.357	17	22	9	3UTR		0	0
hsa-miR-221-3p	NM_001257096	PAX1	AGCTACATTGTCTGCTGGGTTTC#ACCTAGGGGACTAGTGGTA#.(((((...((((.((((((...#)))))).))))..))))).	3235	3254	0.980769	-20.3	0	5.40062e-05	0.574	0	0	-9.56388	15	19	6	3UTR		0	0
hsa-miR-221-3p	NM_001277285	IGSF9B	AGCTACATTGTCTGCTGGGTTTC#GGGGGTGAGCAGGCAGTGTGGGTG#(.((((((((((((((.(.((((#)))).).)))))))))))))).).	15226	15250	0.980769	-26.6	1	0.0110997	0.324	0	0	-5.10125	20	24	14	3UTR		0	0
hsa-miR-221-3p	NM_032871	RELT	AGCTACATTGTCTGCTGGGTTTC#GACTGTGAGGACCGAGAAGCAATGGCCCAGCAGACGAGACAGCA#.(((...((((((((((((((..#.))))))))))))))...))).	1601	1645	0.980769	-29.2	0	0.0638526	0.397	0	0	-11.357	17	22	14	3UTR		0	0
hsa-miR-221-3p	NM_138435	FAM83F	AGCTACATTGTCTGCTGGGTTTC#AGGCACCAAGACCAGGCAGTGTGGCA#.(((((((((((((((((((((.#)))).))).)..))))))))))))).	3219	3245	0.980769	-24.1	1	0.000936644	0.441	0.364209	0.6721	-3.79332	21	26	13	3UTR		0	0
hsa-miR-221-3p	NM_152375	KLHDC7A	AGCTACATTGTCTGCTGGGTTTC#GGAGCATCAGCGGAACCCGTAGCA#.(((((....(((((((((((((#))))).))))))))....))))).	4875	4899	0.980769	-23.4	0	0.00143584	0.544	0	0	-9.94954	18	24	8	3UTR		0	0
hsa-miR-221-3p	NM_152493	ZNF362	AGCTACATTGTCTGCTGGGTTTC#GAAATTTAAAGAATCGGACAGATGGACGCAGAGAACCAGAGGGCAATGTGGG#..(((((((((((.((((.((((#.)))).)))).))))))))))).	1894	1946	0.980769	-24.7	1	0.000276844	0.426	0.478271	0.995153	-5.81384	19	23	11	3UTR		0	0
hsa-miR-221-3p	NM_021215	RPRD1B	AGCTACATTGTCTGCTGGGTTTC#GAACCTAGTAGTGTTTGAGCTG#((((.((....(((((((((((.#)))))))))))....)))))).	2746	2768	0.980769	-20.7	0	0.000931935	0.632	0.244466	0.144892	-15.4939	17	22	11	3UTR		0	0
hsa-miR-221-3p	NM_001007214	CACYBP	AGCTACATTGTCTGCTGGGTTTC#AACCCAAGGCAAACAATGTAT#...((((((((.(((((((((..#))))))..))).)))))))).	2423	2444	0.980769	-19.8	0	0.0296277	0.647	0.206965	0.03855	-9.86134	17	21	8	3UTR		0	0
hsa-miR-221-3p	NM_001012970	C1orf100	AGCTACATTGTCTGCTGGGTTTC#GAACCGGGGGGACATGGCC#.((((...(((((.((.(((((.#))))).)).))))))))).	893	912	0.980769	-20.2	0	0.000495491	0.574	0	0	-10.4084	16	19	9	3UTR		0	0
hsa-miR-221-3p	NM_001042475	CEP85L	AGCTACATTGTCTGCTGGGTTTC#GGAGCCCAGCCTTCCCTGTGTAGTG#.(((((((.....((((((((((#)))))))))).......))))))).	6810	6835	0.980769	-23.6	1	0.0080813	0.559	4.74838	3.54003	-13.5529	17	25	10	3UTR		0	0
hsa-miR-221-3p	NM_001164831	FXYD6	AGCTACATTGTCTGCTGGGTTTC#GAGACTCAGCAGGCTCCGTGCAGCC#.(((.(((.((((((((((((((#))))))))))))))...))).))).	1531	1556	0.980769	-27.6	0	2.84582e-06	0.412	2.12215	2.66689	-8.96875	20	25	14	3UTR		0	0
hsa-miR-221-3p	NM_001286215	RITA1	AGCTACATTGTCTGCTGGGTTTC#GGAACCCCAGGTATTAAAGAAGCCCCTGTGGGGGCAGACAGACATAGCA#.((((..((((((((((((((((#.))))))).......)))))))))...)))).	1256	1305	0.984615	-25.3	0	0.0133059	0.441	0	0	-7.23797	20	32	9	3UTR		0	0
hsa-miR-221-3p	NM_001308350	SIDT1	AGCTACATTGTCTGCTGGGTTTC#GCTCCAGCAAGAGGATGTGA#...((((((.((((((((((...#)).)))))).)).)))))).	3423	3443	0.991453	-20.1	0	0.000276563	0.456	0	0	-7.75705	16	20	6	3UTR		0	0
hsa-miR-221-3p	NM_172217	IL16	AGCTACATTGTCTGCTGGGTTTC#AAGCTCAGGACCAGGCAATGTGACTT#((.(((((((((((((((((((.#))))))))...))))))))))).)).	5633	5659	0.991453	-22.2	0	0.00178944	0.485	0	0	-5.49511	21	26	11	3UTR		0	0
hsa-miR-221-3p	NM_203499	DDX42	AGCTACATTGTCTGCTGGGTTTC#ATCCAGCCCTGAGACATGTAGG#..(((((.((((((((((((...#)))))))....)))))))))).	3582	3604	0.991453	-20.4	0	0.000422021	0.456	0	0	-7.27064	17	22	10	3UTR		0	1
hsa-miR-221-3p	NM_001024455	RTL5	AGCTACATTGTCTGCTGGGTTTC#AGCCCAGTGAGAGTGTGCA#.((.(((((.((.((((((((..#)))))))))).))))))).	2681	2700	0.991453	-22.1	0	0.00104529	0.485	0	0	-9.35698	17	19	10	3UTR		0	0
hsa-miR-221-3p	NM_001256449	GUCY1A1	AGCTACATTGTCTGCTGGGTTTC#GAAATTCAGTGCTGCAGAGACGGTAGCA#.(((((..(.(((((((((((((#)))))))).....))))).)..))))).	7032	7060	1	-20.9	0	1.58039e-05	0.544	0	0	-8.89315	19	28	8	3UTR		0	0
hsa-miR-221-3p	NM_001256695	PRDM11	AGCTACATTGTCTGCTGGGTTTC#GGAGCCTTTCAGGCAATGTTTGCA#.((.((((((((((..(((((((#)))))))..))))))))))..)).	8432	8456	1	-24.6	0	0.000667079	0.574	0	0	-7.79385	19	24	10	3UTR		0	1
hsa-miR-221-3p	NM_001256702	USP3	AGCTACATTGTCTGCTGGGTTTC#GCTCAGCACCCACATACGGCGTAGGACAATGCTGGTC#.(((((((((((((((((((...#))))))))................))))))).)))).	3795	3832	1	-20.4	1	0.00105717	0.574	0	0	-3.79332	19	37	8	3UTR		0	0
hsa-miR-221-3p	NM_001256750	PEX5L	AGCTACATTGTCTGCTGGGTTTC#AAGCTCAGTGAGACCATGTGGTC#.(((((((.(((((((((((((.#))))))))).)))).))))))).	7355	7378	1	-23.7	1	5.89039e-06	0.574	0	0	-4.84971	20	23	9	3UTR		0	0
hsa-miR-221-3p	NM_001256758	RNF165	AGCTACATTGTCTGCTGGGTTTC#AACTCAGTAGCTCCAGTGTAT#...(((((((.((((((((((..#))))))))))...))))))).	2921	2942	1	-19.7	0	0.0229291	0.515	-0.164357	-0.237334	-9.33931	17	21	10	3UTR		0	0
hsa-miR-221-3p	NM_001256809	GRM4	AGCTACATTGTCTGCTGGGTTTC#GAGATACAGCAGACTGTGTCCCAAAGTA#.(((((((.((((((((.(((((#))))).)))))))).)))).....))).	5283	5311	1	-21.5	1	0.000737921	0.515	0	0	-4.84971	20	28	8	3UTR		0	0
hsa-miR-221-3p	NM_001256820	RIT1	AGCTACATTGTCTGCTGGGTTTC#AACCCAGTGGAGCACTGTCTGCTT#(((.(((.(((((((((((((..#))))))))))).)).)))..))).	839	863	1	-21.9	0	0.000183871	0.676	0	0	-9.28323	19	24	11	3UTR		0	0
hsa-miR-221-3p	NM_001256830	ASIC1	AGCTACATTGTCTGCTGGGTTTC#GCCCTCTGCCCAGCTGACAGTGGCA#.(((((..((((.(((((((...#.))))))).))))))))).	2980	3005	1	-25.8	0	0.000513484	0.412	0.683003	0.348094	-8.93978	16	19	9	3UTR		0	0
hsa-miR-221-3p	NM_001257135	LIF	AGCTACATTGTCTGCTGGGTTTC#CCTGGCAGATATTGTGCC#.((.(((.(((((((((((....#))))))))))).))))).	1971	1989	1	-21.9	0	0.000127982	0.426	0	0	-9.13898	16	18	11	3UTR		0	0
hsa-miR-221-3p	NM_001257191	DDX6	AGCTACATTGTCTGCTGGGTTTC#GACAGATTCCAACAGAAGTGTATTTAAATTCTCCAGTAGACAATGCTGGGTA#(.(((((((((((((((((....#.)))))))))))))).))).).	5672	5724	1	-24.7	1	0.00138732	0.559	3.15699	3.00844	-5.10125	18	22	14	3UTR	MIRT478192	0	0
hsa-miR-221-3p	NM_001257205	FGF1	AGCTACATTGTCTGCTGGGTTTC#ACTCAGCAGCAGAGAGCC#.(((.(.(((.(((((((((...#)))))))))))).)))).	1626	1644	1	-19.9	0	0.00252888	0.426	1.11943	0.974319	-12.2808	16	18	12	3UTR		0	0
hsa-miR-221-3p	NM_001257413	IKZF3	AGCTACATTGTCTGCTGGGTTTC#GGAGCCCAGCCATGTGTGGA#..((((((.....((((((((((#))))))))))...)))))).	8934	8954	1	-22.5	1	0.00025836	0.515	0	0	-14.7166	16	20	10	3UTR		0	0
hsa-miR-221-3p	NM_001257967	ITPRID1	AGCTACATTGTCTGCTGGGTTTC#GAGCCTCAGAAGACAGTGTGA#...((((((((((.((((((((.#))))).))).)))))))))).	4536	4557	1	-22.3	0	0.000711259	0.618	0	0	-7.37138	18	21	10	3UTR		0	1
hsa-miR-221-3p	NM_001258031	SERINC4	AGCTACATTGTCTGCTGGGTTTC#GAACCACCGCTGATCCCAGCAGACAGTGTGGCA#.((((((((((((((((((.((.#.)).)))))))))))))))))).	2041	2074	1	-35.8	1	0.00379665	0.412	0	0	-3.79332	20	23	18	3UTR		0	0
hsa-miR-221-3p	NM_001258039	SPRY1	AGCTACATTGTCTGCTGGGTTTC#GAGAGCCAGTGGGCTTTTGTGTAGCC#.(((((((.(((((((((.((((#)))).)))))))))....))))))).	1388	1414	1	-26.4	1	7.20814e-06	0.574	0.952775	0.73675	-4.84971	20	26	9	3UTR		0	0
hsa-miR-221-3p	NM_001258240	TMEM218	AGCTACATTGTCTGCTGGGTTTC#ACCCAGTCCTGCCACCCCACAGGCAACTAAGCTC#((((...(((((((..((((...#.))))..)))))))...)))).	2019	2053	1	-18.6	0	0.000950153	0.515	0	0	-12.4698	15	22	7	3UTR		0	0
hsa-miR-221-3p	NM_001258248	SP6	AGCTACATTGTCTGCTGGGTTTC#GAAGCCCAGCAGAAGCTGAGCC#.(((.((...(((((((((((((#)))))))))))))...))))).	2769	2791	1	-27.7	0	9.45401e-06	0.412	0	0	-12.5249	18	22	13	3UTR		0	0
hsa-miR-221-3p	NM_001258345	PACRGL	AGCTACATTGTCTGCTGGGTTTC#CTTAGTAGACAGTGGGGTA#.(((.((((((((((((((....#)))))))))))))).))).	2833	2852	1	-22.5	0	0.00136065	0.603	0	0	-7.91236	17	19	14	3UTR		0	0
hsa-miR-221-3p	NM_001258438	TARS1	AGCTACATTGTCTGCTGGGTTTC#GACCTAGTCAGTTTTTAAACAATGTGCA#.((.(((((((((((((((((..#))))))).))).......))))))))).	2541	2569	1	-20	0	0.158647	0.706	0	0	-6.82535	19	28	9	3UTR		0	0
hsa-miR-221-3p	NM_001258459	PHKG1	AGCTACATTGTCTGCTGGGTTTC#GACATCCAGTGACAGTGTGGG#..((((((((((.(((((((.((#)).))))))))))))))))).	1831	1852	1	-24.4	1	7.87995e-05	0.515	0	0	-6.24613	19	21	17	3UTR		0	0
hsa-miR-221-3p	NM_001260486	ZNF155	AGCTACATTGTCTGCTGGGTTTC#AGCCCGCAGGCTAAGTGCA#.((.((...((((((.(((((..#)))))))))))...)))).	2570	2589	1	-19.4	0	0.00215333	0.485	0	0	-11.9721	15	19	11	3UTR		0	0
hsa-miR-221-3p	NM_001260491	SLC9A8	AGCTACATTGTCTGCTGGGTTTC#GGACCCTGGGCTAGAGCAAGCACATCTCCATCTCTTCCACCTCAGGCAGTGTGGCTC#((((((((((((((..((((...#.)))))))))))))))))).	3354	3411	1	-25.1	1	8.05298e-05	0.426	0	0	-4.90607	18	20	18	3UTR		0	0
hsa-miR-221-3p	NM_001261420	OS9	AGCTACATTGTCTGCTGGGTTTC#GACACTTAGCAGGCACTGAGCA#.(((.((.((((((((((((.((#)).)))))))))))).))))).	2236	2258	1	-23.8	0	0.00078925	0.397	0	0	-10.226	19	22	12	3UTR		0	0
hsa-miR-221-3p	NM_001261817	TCP11	AGCTACATTGTCTGCTGGGTTTC#AACATCACCAGTGACCAGCAGACAGTGAGCTT#((((.(((((((((((((.....#.))))))))))))))))).	1708	1740	1	-29.2	0	0.0180084	0.441	0	0	-8.05661	17	19	17	3UTR		0	0
hsa-miR-221-3p	NM_001261827	MS4A14	AGCTACATTGTCTGCTGGGTTTC#AAACCCAGCACGCAACAGCC#.(((...((((.((((((((((.#)))))))))).)))).))).	2331	2351	1	-22.2	0	0.173589	0.529	0	0	-14.7038	17	20	10	3UTR		0	0
hsa-miR-221-3p	NM_001265615	FAM153B	AGCTACATTGTCTGCTGGGTTTC#AGGCCAGCAGGCCCTCAGTAGGTCCTGGTGTCAAGCA#.(((((((((((((((((.((..#)).)))))))))..............)))))..))).	1619	1656	1	-20.2	1	1.88188e-06	0.368	0	0	-3.79332	19	37	9	3UTR		0	0
hsa-miR-221-3p	NM_001267046	FRMD6	AGCTACATTGTCTGCTGGGTTTC#GGAGCCCAGATCATAATGCAGTG#.(((.((((((...(((((((((#)))))))))...)))))).))).	4136	4159	1	-20.6	0	0.00916783	0.559	0	0	-13.4051	18	23	9	3UTR		0	0
hsa-miR-221-3p	NM_001267050	GPR155	AGCTACATTGTCTGCTGGGTTTC#GAGACCAGCCTGGCCAATGTGGTG#.(((((((((((.(((.((((((#)))))))))..))).)))))))).	4772	4796	1	-22.2	1	7.27107e-05	0.544	0	0	-5.08246	20	24	9	3UTR		0	0
hsa-miR-221-3p	NM_001267062	PLEKHB2	AGCTACATTGTCTGCTGGGTTTC#GGGACTCTGTGGCTGTTCACTGAGCACCAGGGCAGACTGTAGCTG#(((((((..(((((((.((((((#.))).)))..)))))))))))))).	2079	2124	1	-24.4	1	8.30888e-05	0.456	0	0	-7.3076	20	25	14	3UTR		0	0
hsa-miR-221-3p	NM_001267706	CD274	AGCTACATTGTCTGCTGGGTTTC#GAGCGTGACAAGAGGAAGGAATGGGCCCGTGGGATGCAGGCAATGTGGG#..((((((((((((((((((((.#.)))))))......))))))))))))).	668	717	1	-27	1	0.0163458	0.471	0	0	-4.957	20	28	13	3UTR		0	0
hsa-miR-221-3p	NM_001267708	ZNF706	AGCTACATTGTCTGCTGGGTTTC#ACCCTGTAGATAACTGATAGCTT#(((((((((((((((.((((...#)))).)))))))).)).))))).	1281	1304	1	-21.5	1	0.0320598	0.515	0	0	-4.17062	19	23	8	3UTR		0	0
hsa-miR-221-3p	NM_001267843	CLOCK	AGCTACATTGTCTGCTGGGTTTC#AGACAGTCCAGTAGACTTGGTAGCG#.(((((...((((((((((....#.))))))))))...))))).	3894	3919	1	-25	0	0.000964644	0.426	0	0	-8.70704	15	20	10	3UTR		0	0
hsa-miR-221-3p	NM_001270433	CDK2AP1	AGCTACATTGTCTGCTGGGTTTC#ACTTAGTAGCCGGTTCCCATTTGCCATACAATGTAGG#..((((((((((((((((((...#)))))))))..................))))))))).	818	855	1	-18.4	1	0.00404685	0.632	0	0	-4.957	18	37	9	3UTR		0	0
hsa-miR-221-3p	NM_001270473	CENPN	AGCTACATTGTCTGCTGGGTTTC#GAACCCGGGAGACATAGGTTGCA#.((.((..(((((.((((((((.#)))))))).)))))...)).)).	3350	3373	1	-23.6	0	9.40771e-05	0.412	0	0	-11.5395	17	23	8	3UTR		0	0
hsa-miR-221-3p	NM_001270482	PSMD11	AGCTACATTGTCTGCTGGGTTTC#GGCTCCAGCAGAGTAGCC#.(((((....(((((((((((..#))).))))))))))))).	1951	1969	1	-21.4	0	0.000390264	0.309	0	0	-9.94954	16	18	13	3UTR		0	0
hsa-miR-221-3p	NM_001270485	CAMKK2	AGCTACATTGTCTGCTGGGTTTC#GAAACCCAGCACGTGTGTAGA#..((((((....(((((((((((#)))))))))))...)))))).	1983	2004	1	-25.5	1	0.00822688	0.515	0	0	-13.4275	17	21	11	3UTR		0	0
hsa-miR-221-3p	NM_001270572	CSNK1G3	AGCTACATTGTCTGCTGGGTTTC#AAGCAATATGGGTTCGGCAGATGGTGGTGGTA#.((((((((((((((((((....#.)))))))))))))).)))).	2123	2155	1	-21.1	1	0.0750413	0.603	0.258	1.01622	-3.79332	18	21	14	3UTR		0	0
hsa-miR-221-3p	NM_001270622	SLC16A7	AGCTACATTGTCTGCTGGGTTTC#AAGCTCAGCAGACTACCCAAAGTTAAAAGGTAGTA#.(((((...(((((((((((((.#)))))))))))))................))))).	5455	5490	1	-23.3	0	0.000903232	0.647	0	0	-8.70704	18	35	13	3UTR		0	0
hsa-miR-221-3p	NM_001270934	JAKMIP2	AGCTACATTGTCTGCTGGGTTTC#ACTTATAGGGGCAATGTAGCA#.((((((((((((..(((((...#)))))...)))))))))))).	7814	7835	1	-20.8	1	0.0468231	0.75	0	0	-5.38561	17	21	12	3UTR		0	0
hsa-miR-221-3p	NM_001270938	ZNF551	AGCTACATTGTCTGCTGGGTTTC#ACTCAGAAGGGACAATGTGATGGCA#.((((((((((((.((((((...#))))))...)))))))))...))).	2766	2791	1	-20.4	1	0.00050704	0.574	0	0	-4.65016	18	25	9	3UTR		0	0
hsa-miR-221-3p	NM_001270943	KLF7	AGCTACATTGTCTGCTGGGTTTC#GAACTCAGCAAGGCAGACTGGCTG#(((((..(((((((((((((((.#)))))))))).)))))..))))).	1191	1215	1	-23.8	0	4.64152e-06	0.544	0	0	-7.38222	20	24	10	3UTR		1	1
hsa-miR-221-3p	NM_001270989	EPGN	AGCTACATTGTCTGCTGGGTTTC#GAGGCTGACACAGGACAATCACTTGAACCCAGGAGGCAGAGGTTGTAGTG#.((((((((((((.((((((((.#.)))))))).))))))....)))))).	1738	1788	1	-26.9	1	2.37179e-06	0.441	0	0	-4.65016	20	27	8	3UTR		0	0
hsa-miR-221-3p	NM_001271518	KCNMA1	AGCTACATTGTCTGCTGGGTTTC#AAGCCCATGCAGACTATTGTGT#...((((..(((((((((((((.#))))))).))))))...)))).	7075	7097	1	-21.6	0	0.00382253	0.515	0	0	-9.88456	17	22	7	3UTR		0	0
hsa-miR-221-3p	NM_001271572	PEX11A	AGCTACATTGTCTGCTGGGTTTC#GAGGCCAGGAGTTCAAGACCAGCCTGGGCAATGTAGTG#.(((((((((((((((((..((.#.))..)))))..)))))))))))).	1739	1777	1	-24.9	1	0.000104907	0.529	0	0	-3.79332	19	25	12	3UTR		0	0
hsa-miR-221-3p	NM_001271593	PPME1	AGCTACATTGTCTGCTGGGTTTC#GGCCCAGCCCTGCCTCATGGGATGGACAATGCATGGG#..(((((((((((((((((((..#))))))))...............))))))))..))).	1734	1771	1	-20.9	1	6.48421e-05	0.529	0	0	-4.957	19	37	8	3UTR		0	0
hsa-miR-221-3p	NM_001271741	CSNK1A1	AGCTACATTGTCTGCTGGGTTTC#GAACCCAAGACAATGAGCTA#((((.((((((((..(((((((.#))))))))))))))))))).	4199	4219	1	-24.1	0	0.104353	0.662	0	0	-9.6489	19	20	19	3UTR		0	0
hsa-miR-221-3p	NM_001271784	FAR2	AGCTACATTGTCTGCTGGGTTTC#GAAATATTTTCCATAGCAGACAACCCAGCTC#((((...((((((((((((....#.)).))))))))))...)))).	3130	3161	1	-20.3	0	0.00491399	0.603	0	0	-11.5013	16	22	10	3UTR		0	0
hsa-miR-221-3p	NM_001271818	ORAI2	AGCTACATTGTCTGCTGGGTTTC#GAACCCAGGAGGCAGAGGTTGCA#.((.((.((((((.((((((((.#)))))))).))))))..)).)).	2745	2768	1	-24.9	0	4.3018e-05	0.471	0	0	-9.22587	18	23	8	3UTR		0	0
hsa-miR-221-3p	NM_001271844	TBC1D16	AGCTACATTGTCTGCTGGGTTTC#CCCAGCAGGCGGCGATGGA#..((((.((((((((((((....#)))))))))))).).))).	6833	6852	1	-23.1	0	0.000351691	0.324	0	0	-6.50069	16	19	12	3UTR		0	0
hsa-miR-221-3p	NM_001271852	CEP57L1	AGCTACATTGTCTGCTGGGTTTC#AACACCAGCCTGGCCAATGTAGTG#.(((((((((((.((((((((..#))).)))))..))).)))))))).	5964	5988	1	-22	1	0.000597275	0.603	0	0	-5.08246	19	24	8	3UTR		0	0
hsa-miR-221-3p	NM_001271869	SZRD1	AGCTACATTGTCTGCTGGGTTTC#GGGACCCAGCAAGGACTCAGAGAGTCAGACAGTGCCACTTGGCC#.((((((((((((((((((((((#)))))))))))................))))))).....)))).	745	789	1	-25.6	1	7.59498e-05	0.456	0	0	-3.79332	22	44	11	3UTR		0	0
hsa-miR-221-3p	NM_001271874	AAR2	AGCTACATTGTCTGCTGGGTTTC#GAGGCCCAGTGGGTCATCTCCCAAGGTGGGTGTGGA#..(((((((((((((((((((((#))))))))))))).)).............)))))).	1858	1894	1	-23.2	1	5.05172e-06	0.338	0	0	-4.957	21	36	13	3UTR		0	0
hsa-miR-221-3p	NM_001271893	TWIST2	AGCTACATTGTCTGCTGGGTTTC#AAGCTAAGTGACTGCAGTGTGGCTG#(((((((((((.((((.(((((.#))))).))))...))))))))))).	1274	1299	1	-20	1	6.74477e-05	0.559	0	0	-7.28438	20	25	11	3UTR		0	0
hsa-miR-221-3p	NM_001271895	TARS2	AGCTACATTGTCTGCTGGGTTTC#GACCCCAACCCAGCTGACAATGTGGA#..((((((((((.((((((((..#.)))))))).)))))))))).	2002	2028	1	-30.3	1	0.00179998	0.412	0	0	-6.24613	18	21	10	3UTR		0	0
hsa-miR-221-3p	NM_001271900	PPP2R2B	AGCTACATTGTCTGCTGGGTTTC#AAACTCACAGGCAATGGTGGCA#.(((((((((((((.(((((((.#)))))))))))))))).)))).	8076	8098	1	-24.4	1	0.000721365	0.441	0	0	-4.52877	20	22	16	3UTR		0	0
hsa-miR-221-3p	NM_001271946	SLIT3	AGCTACATTGTCTGCTGGGTTTC#GGAATGTATCCCAGTAGAGAAGGTAGTC#.(((((.((.(((((((((....#.))))))))).)).))))).	6011	6039	1	-24.1	0	5.20717e-05	0.529	0	0	-6.57952	16	20	9	3UTR		0	0
hsa-miR-221-3p	NM_001271977	STK25	AGCTACATTGTCTGCTGGGTTTC#AGCCCAGCAGCGGGAGGCTG#((((...(((.((((((((((..#)))))))))))))..)))).	3855	3875	1	-23.4	0	1.08447e-08	0.353	0	0	-14.326	17	20	13	3UTR		0	0
hsa-miR-221-3p	NM_001271995	CREB3L3	AGCTACATTGTCTGCTGGGTTTC#GAGACCCAGACAGAGAGACAGGCA#.(((...((.(((((((((((((#))))))))).)))).))...))).	2286	2310	1	-24.3	0	0.0002052	0.441	0	0	-12.5995	18	24	9	3UTR		0	0
hsa-miR-221-3p	NM_001272012	ITPRIP	AGCTACATTGTCTGCTGGGTTTC#GAGCCTGGCAGAAGCTCTGTGGTTG#(((((((...((((((((((((.#)))))))))))).....))))))).	3152	3177	1	-23.7	1	0.000497382	0.382	0	0	-8.55011	19	25	12	3UTR		0	0
hsa-miR-221-3p	NM_001273	CHD4	AGCTACATTGTCTGCTGGGTTTC#GGAACCCAGCGGCTCTAGCC#.((((....(.((((((((((((#)))))))))))))..)))).	6355	6375	1	-23.6	0	2.8704e-07	0.544	0	0	-13.4328	17	20	13	3UTR		0	0
hsa-miR-221-3p	NM_001276266	DUOXA1	AGCTACATTGTCTGCTGGGTTTC#GACACCCAGCACCAATCTACAGACGGAGTAGA#..((((.(((((((((((((.((#)).))))))))..........))))).)))).	1462	1494	1	-22.3	0	0.000428891	0.574	0	0	-6.50069	19	32	8	3UTR		0	0
hsa-miR-221-3p	NM_001276277	PPIP5K2	AGCTACATTGTCTGCTGGGTTTC#AAGCCCAGCAGGCTCGTACCA#.(.(((...(((((((((((((.#)))))))))))))..))).).	4471	4492	1	-23.4	0	0.0047007	0.574	0	0	-10.2646	17	21	13	3UTR		0	0
hsa-miR-221-3p	NM_001276326	SLC22A12	AGCTACATTGTCTGCTGGGTTTC#AGGCCCAGGGGAACGAGCTGGCC#.((((..((((((.((((((((.#)))))))).))).)))..)))).	2180	2203	1	-22.5	0	1.70816e-06	0.338	0	0	-8.09481	18	23	8	3UTR		0	0
hsa-miR-221-3p	NM_001276366	C9orf153	AGCTACATTGTCTGCTGGGTTTC#GAACCCAGAGGGAATGCAAGAAATAATGGCA#.((((((((.(((.((((((((.#))))))))))).))))..........)))).	1754	1785	1	-20.3	1	0.0336929	0.676	0.548299	0.434948	-5.89267	19	31	11	3UTR		0	0
hsa-miR-221-3p	NM_001276436	KCNJ15	AGCTACATTGTCTGCTGGGTTTC#GCCTGGCAGACAGTGGCTC#((((((..((((((((((((...#)))))))))))))))))).	4662	4681	1	-26.6	0	2.47067e-05	0.471	0	0	-7.7949	18	19	18	3UTR		0	0
hsa-miR-221-3p	NM_001276495	PSG4	AGCTACATTGTCTGCTGGGTTTC#CTCAGGGGAAATGTGGCTC#(((((((((.(((.(((((....#))))).)))))))))))).	1508	1527	1	-21.8	1	0.000158596	0.544	-0.533023	-0.440717	-6.03692	17	19	12	3UTR		0	0
hsa-miR-221-3p	NM_001277176	WDR72	AGCTACATTGTCTGCTGGGTTTC#GGGATGCAGTAGACAGGAGATGGG#..((((.((((((((((.(((((#))))).))))))))))..).))).	1585	1609	1	-20.1	0	0.153811	0.574	2.69841	1.08015	-6.50069	19	24	10	3UTR		0	0
hsa-miR-221-3p	NM_001277313	FMN1	AGCTACATTGTCTGCTGGGTTTC#AGACCTAGCAGAAATGTAA#...((((((.((((((((((((.#)))))))))))))))))).	11668	11687	1	-23.3	0	0.00685876	0.676	0	0	-7.75705	18	19	18	3UTR		0	0
hsa-miR-221-3p	NM_001277403	ZNF730	AGCTACATTGTCTGCTGGGTTTC#GAAACCCTACAAATGTGAAGAATGTGGCA#.((((((((.((((..(((((((#)))))))..)).....))..)))))))).	1735	1764	1	-20.3	1	0.00459558	0.632	0	0	-6.00433	19	29	8	3UTR		0	0
hsa-miR-221-3p	NM_001277406	POTEI	AGCTACATTGTCTGCTGGGTTTC#GCCCAGCAGAGATCAGGTC#.(((....(.((((((((((...#)))))))))).)...))).	5727	5746	1	-20.8	0	0.0178455	0.574	0	0	-14.9131	14	19	10	3UTR		0	0
hsa-miR-221-3p	NM_001278138	ENG	AGCTACATTGTCTGCTGGGTTTC#GGAGCCCAGCCTGGGAGCCCAGAGGGTGGCAAGAACAGTGGGCG#.(((.((((((((((((((((((#)))))))))).....................))).)))))))).	2594	2638	1	-23.5	0	0.000307161	0.338	0	0	-7.91236	21	44	10	3UTR		0	0
hsa-miR-221-3p	NM_001278170	ZNF33A	AGCTACATTGTCTGCTGGGTTTC#GAGACCCACAGAGCTAATGTT#....((((((((((.((((((((#))))))))))))..)))))).	3549	3570	1	-19.6	0	0.018685	0.706	0	0	-10.282	18	21	12	3UTR		0	0
hsa-miR-221-3p	NM_001278172	SDHC	AGCTACATTGTCTGCTGGGTTTC#GAACCCAGGAGGCGGAGCTT#((((...((((((.((((((((.#)))))))).)))))))))).	8146	8166	1	-23.1	0	0.00102896	0.368	0	0	-12.3581	18	20	10	3UTR		0	0
hsa-miR-221-3p	NM_001278189	TPM3	AGCTACATTGTCTGCTGGGTTTC#GAAATCATTGCAAAAAGTTTTTTTGTCGGGCGGAGGGTGTGGTG#.((((((((.((((((.((....#.)).)))))).)))))))).	3148	3192	1	-22.8	1	0.00282711	0.588	0	0	-5.03583	16	20	8	3UTR		1	0
hsa-miR-221-3p	NM_001278196	ZBTB18	AGCTACATTGTCTGCTGGGTTTC#GGGGGTTAGTAGACTATGTGGA#..((((((.(((((((((.((((#)))).))))))))).)))))).	3313	3335	1	-21.5	1	0.0310941	0.471	0	0	-6.01339	19	22	9	3UTR		0	0
hsa-miR-221-3p	NM_001278233	LMCD1	AGCTACATTGTCTGCTGGGTTTC#GAGCCCAGTAAGTCAAGGCTGCAGTGAGCTG#((((.(((((((((((((((((.#)))))))))).)........)))))))))).	3425	3456	1	-22.4	0	6.15779e-06	0.441	0	0	-8.05661	21	31	10	3UTR		0	0
hsa-miR-221-3p	NM_001278240	ZNF189	AGCTACATTGTCTGCTGGGTTTC#GAATCCACACTGGTGAGAGACCCTATCTGTGCAGACAGTGTGGA#..(((((((((((((.(((((((#.))))))).......))))))))))))).	1895	1939	1	-28.9	1	0.000677594	0.574	2.56563	4.20701	-5.19005	20	29	13	3UTR		0	0
hsa-miR-221-3p	NM_001278242	MS4A15	AGCTACATTGTCTGCTGGGTTTC#AGGCCTGGTAGATGAGATGGCTT#(((((..(((((((((((((((.#)))))))))))))))..))))).	1766	1789	1	-23.6	0	0.00226895	0.5	-0.237407	1.77219	-7.38222	20	23	15	3UTR		0	0
hsa-miR-221-3p	NM_001278267	NBPF20	AGCTACATTGTCTGCTGGGTTTC#AAACGTAAAAAGATAATGTAGCTG#(((((((((((((..((.((((.#)))).))...))))))))))))).	17715	17739	1	-21.3	1	0.00713631	0.721	0.395242	0.139104	-5.52986	19	24	13	3UTR		0	0
hsa-miR-221-3p	NM_001278293	ARL6	AGCTACATTGTCTGCTGGGTTTC#GAAGTTGGGCAACAGTGTAGTC#.((((((((((.((((.((((((#)))))).)))))))))))))).	3017	3039	1	-21.1	1	0.000193324	0.632	0	0	-7.14013	20	22	14	3UTR		0	0
hsa-miR-221-3p	NM_001278305	UBE2F	AGCTACATTGTCTGCTGGGTTTC#GAGACCCAGCAGGTGAGGAATGTAGG#..(((((((.(((((((((((((#))))))))))))....).))))))).	2089	2115	1	-28.5	1	0.00119665	0.469	0	0	-6.19951	20	26	12	3UTR		0	0
hsa-miR-221-3p	NM_001278322	MOBP	AGCTACATTGTCTGCTGGGTTTC#GAAACTTAGCTTTCAGAGAATGTCTATGGGCTC#(((((((((.(((((((((((((#))))))))))....))).))))).....)))).	2409	2442	1	-21	1	0.00104562	0.603	0	0	-5.18008	22	33	10	3UTR		0	0
hsa-miR-221-3p	NM_001278370	MPP2	AGCTACATTGTCTGCTGGGTTTC#CCCAGCAGGCCCTAAGTCTGGCTT#(((((.(((((((((((((....#))))))))))....))).))))).	1988	2012	1	-23.1	0	1.34115e-05	0.368	0	0	-5.83853	18	24	10	3UTR		0	0
hsa-miR-221-3p	NM_001278390	SLC38A1	AGCTACATTGTCTGCTGGGTTTC#GGAACAGCTCTGGTCTGCAGCTCCCAGCAAGATCGATGTAGA#..(((((((((((((((((....#.))))))).)).)))))))).	2541	2583	1	-24.8	1	0.00184156	0.515	0.0816445	-0.11877	-4.957	17	21	8	3UTR		0	0
hsa-miR-221-3p	NM_001278402	RAB3IP	AGCTACATTGTCTGCTGGGTTTC#GAGTCAGGAGAAACGCTCGAACCCAGGAGGCAGAGGTTGTGGTG#.((((((((((((.((((((((.#.)))))))).))))))....)))))).	6330	6374	1	-26.7	1	1.50438e-05	0.426	-0.177539	-0.261389	-4.65016	20	27	8	3UTR		0	0
hsa-miR-221-3p	NM_001278403	LILRB2	AGCTACATTGTCTGCTGGGTTTC#GAGCCAGCAGACAGCCCAGCA#.(((...(((((((((((.((..#)).)))))))))))...))).	2520	2541	1	-24.2	0	0.0311706	0.515	-0.140243	-0.0929509	-11.357	16	21	11	3UTR		0	0
hsa-miR-221-3p	NM_001278409	ANXA11	AGCTACATTGTCTGCTGGGTTTC#GCCCAGCAGGCAATATTGCA#.((...((((((((((((((...#))))))))))))))...)).	4438	4458	1	-27.3	0	0.000481694	0.515	0	0	-12.8453	16	20	14	3UTR		0	0
hsa-miR-221-3p	NM_001278524	ZNF518A	AGCTACATTGTCTGCTGGGTTTC#GGACCCAGAGGCAGTGC#.....((((((((.((((((((.#)))))))))))))))).	6461	6478	1	-22.3	0	0.0150301	0.559	0	0	-14.5224	16	17	16	3UTR		0	0
hsa-miR-221-3p	NM_001278547	MAPK8	AGCTACATTGTCTGCTGGGTTTC#GAGCAGAGCAGGCATAAATGGTGGTTA#((((((..((((((((..((((.#))))..))))))))......)))))).	2668	2695	1	-19.5	0	0.00791512	0.691	0	0	-7.7949	18	27	8	3UTR		0	1
hsa-miR-221-3p	NM_001278563	COL26A1	AGCTACATTGTCTGCTGGGTTTC#GGGGCCTGGCAGGCTCCATGGCA#.((((....((((((((((((((#))))))))))))))....)))).	2567	2590	1	-25.3	0	2.90362e-06	0.338	0	0	-10.608	18	23	14	3UTR		0	0
hsa-miR-221-3p	NM_001278619	PCDH11Y	AGCTACATTGTCTGCTGGGTTTC#GAACCCGGGAGGCGGAGCTT#((((...((((((.((((((((.#)))))))).)))))))))).	4525	4545	1	-22.4	0	3.99433e-05	0.353	0	0	-12.3581	18	20	10	3UTR		0	1
hsa-miR-221-3p	NM_001278650	B3GALT5	AGCTACATTGTCTGCTGGGTTTC#AGCCAGTAGGCATAGGAGCG#.(((....((((((((((.(...#).))))))))))....))).	1567	1587	1	-20.7	0	0.00017675	0.5	0	0	-13.6706	14	20	10	3UTR		0	0
hsa-miR-221-3p	NM_001278687	SSTR3	AGCTACATTGTCTGCTGGGTTTC#GAGGCCCAGGGAAGACAAGAAGAGGCTG#((((...((((((.(((((((((#)))))))))...)))))).....)))).	2894	2922	1	-23.3	0	0.105403	0.368	0	0	-12.3581	19	28	9	3UTR		0	0
hsa-miR-221-3p	NM_001278792	RFC2	AGCTACATTGTCTGCTGGGTTTC#ACTCGGGAGGCTGTGGCA#.((((((..((((.((((((...#)))))).)))))))))).	1271	1289	1	-21.3	1	0.00262245	0.382	-0.219601	-0.291287	-8.02019	16	18	10	3UTR		0	0
hsa-miR-221-3p	NM_001279356	LYPLA1	AGCTACATTGTCTGCTGGGTTTC#GAGGCCTTGTGTAGAAGTACACCAGCATCATTGTAGTA#.((((((.((..((((((((...#.)).)))))).)).)))))).	724	762	1	-20	1	0.0206761	0.544	0	0	-12.2785	16	21	6	3UTR		0	1
hsa-miR-221-3p	NM_001280798	GLS2	AGCTACATTGTCTGCTGGGTTTC#ACCCCATTCCCTCAGCAGACAGAGTAC#...(((.((((((((((((....#.)))))))))))).))).	1657	1684	1	-22.7	0	0.0114609	0.456	3.76279	5.4069	-8.05823	15	18	12	3UTR		0	0
hsa-miR-221-3p	NM_001281430	TNFRSF8	AGCTACATTGTCTGCTGGGTTTC#GGATCCCAGCAGTGATGTTGGTTG#((((((((((.((((((((.(((#))).)))))))))))))).)))).	2239	2263	1	-24	1	3.35937e-05	0.426	0	0	-6.76235	21	24	14	3UTR		0	0
hsa-miR-221-3p	NM_001281432	ZNHIT3	AGCTACATTGTCTGCTGGGTTTC#GAGGCAGCGCTCGGATGGACGTGACACCAGCCTGGTCTTGTGCTGTCTGGACAGTGTAGCTA#(((((((((((((((((((((..#.))).))))).................))))))))))))).	967	1029	1	-28	1	0.00152771	0.368	0	0	-3.93757	21	41	13	3UTR		0	0
hsa-miR-221-3p	NM_001281458	SLC35C2	AGCTACATTGTCTGCTGGGTTTC#AGACTCAGCAGGCGGAGGTGGA#..((((.(((((((((((((((.#)))))))))))))))..)))).	3057	3079	1	-25.6	0	5.61273e-05	0.397	0	0	-6.50069	19	22	15	3UTR		0	0
hsa-miR-221-3p	NM_001281520	MCM8	AGCTACATTGTCTGCTGGGTTTC#GAGACCCAGTATGGAACCCACTCCTAGCCCTTGTGACAATATTGCA#.((...(((((((((((((((((#))))))))))).......................))))))...)).	7154	7200	1	-21.9	0	0.00541024	0.544	0	0	-12.8453	19	46	11	3UTR		0	0
hsa-miR-221-3p	NM_001281528	PSME1	AGCTACATTGTCTGCTGGGTTTC#GAAGCCCAGGGGAGAAA#.......((.(((.(((((((((#))))))))).))).)).	790	807	1	-20.9	0	0.000850698	0.529	0	0	-19.2096	14	17	9	3UTR		0	0
hsa-miR-221-3p	NM_001281726	BTD	AGCTACATTGTCTGCTGGGTTTC#GAGTCCAGCCTGGGCAATGTAA#...(((((((((((((((((((.#)))))))))..)))))))))).	2362	2384	1	-21.5	0	0.000492869	0.559	0	0	-6.51454	19	22	10	3UTR		0	0
hsa-miR-221-3p	NM_001281736	ENOX2	AGCTACATTGTCTGCTGGGTTTC#AAGCCAGTAGACTTTGAGTA#.(((.((..(((((((((.((..#)).)))))))))..))))).	4230	4250	1	-21.2	0	0.0857971	0.676	1.0771	0.907787	-11.2824	16	20	9	3UTR		0	0
hsa-miR-221-3p	NM_001281767	EPHA5	AGCTACATTGTCTGCTGGGTTTC#AACCTTTGCGGATGTGTGGCA#.((((((.(((((((.(((((..#)))))..))))))))))))).	3848	3869	1	-22.1	1	1.64348e-05	0.544	0	0	-6.34001	18	21	13	3UTR		0	0
hsa-miR-221-3p	NM_001281932	NCAPG2	AGCTACATTGTCTGCTGGGTTTC#GGGGCCCGGCGCAGTGGCA#.(((((..(((..((((((((((#)))))))))))))))))).	3983	4002	1	-22.6	0	0.00012102	0.471	0	0	-12.2866	18	19	18	3UTR		0	0
hsa-miR-221-3p	NM_001282180	PPP2R5E	AGCTACATTGTCTGCTGGGTTTC#TCCAGCAAAAGAGGATGTAGCC#.((((((((.(((((((((....#)))))))...)).)))))))).	2999	3021	1	-24.4	1	0.00355882	0.662	0	0	-5.03583	17	22	8	3UTR		1	0
hsa-miR-221-3p	NM_001282204	PCYT2	AGCTACATTGTCTGCTGGGTTTC#GGGGCCACCCCCTGTAGCAGGCGATGCTAGA#..((((((((((((((((((...#.)))).....))))))))))).))).	2107	2138	1	-23	1	0.000194688	0.382	0	0	-4.957	18	26	11	3UTR		0	0
hsa-miR-221-3p	NM_001282283	GAB3	AGCTACATTGTCTGCTGGGTTTC#AAGCCCAGCAATGGTGGCA#.(((((......((((((((((.#))))))))))...))))).	2126	2145	1	-21.9	0	0.000163084	0.515	0	0	-16.1211	15	19	10	3UTR		0	0
hsa-miR-221-3p	NM_001282309	CATSPER2	AGCTACATTGTCTGCTGGGTTTC#GGGCCCAGCAAAAGATAATGAAGG#..((.(((((((((((((((((.#))))))))))...))))))).)).	1725	1749	1	-22.8	0	0.0157639	0.632	0	0	-9.07604	19	24	10	3UTR		0	0
hsa-miR-221-3p	NM_001282327	PES1	AGCTACATTGTCTGCTGGGTTTC#GAGGCCAGCCCCTAGCAGCTGGATGTGGCA#.((((((((..((((((((....#.))))))))...)))))))).	2296	2326	1	-25.1	1	0.000190173	0.368	0.812436	-0.670126	-7.86061	16	21	8	3UTR		0	0
hsa-miR-221-3p	NM_001282408	IL1RL1	AGCTACATTGTCTGCTGGGTTTC#CCAGTGATAAGTGTGGCA#.(((((((((((.(((((.....#)))))))))).)))))).	3180	3198	1	-20.1	1	0.00427921	0.412	0	0	-5.08246	16	18	10	3UTR		0	0
hsa-miR-221-3p	NM_001282426	PIK3CG	AGCTACATTGTCTGCTGGGTTTC#AAACCTAAGCAGATGTTGTAGA#..(((((.((((((((((((((.#))))))).))))))).))))).	6570	6592	1	-23.1	0	0.0184104	0.544	0	0	-7.27064	19	22	7	3UTR		0	0
hsa-miR-221-3p	NM_001282440	GNA12	AGCTACATTGTCTGCTGGGTTTC#GAAGCCCACAGACGCTGGAGG#..((.((.((((((.((((((((#)))))))))))))).)).)).	2233	2254	1	-22.1	0	3.54762e-05	0.456	-0.979749	-0.454199	-12.1251	18	21	14	3UTR		0	0
hsa-miR-221-3p	NM_001282455	CHRNA2	AGCTACATTGTCTGCTGGGTTTC#GAAGCTCTGCAGAAGGTCGCAATAGTGTGGTG#.((((((((((((((.(((((((#))))))).))))).........))))))))).	2342	2374	1	-22.6	1	0.000305068	0.456	0	0	-4.02637	21	32	9	3UTR		0	0
hsa-miR-221-3p	NM_001282512	TXNRD2	AGCTACATTGTCTGCTGGGTTTC#GCCTAGGAGGAGTGTGGTG#.((((((((.(((.((((((...#)))))).))))))))))).	1558	1577	1	-20.9	1	0.00157748	0.456	0	0	-5.89267	17	19	11	3UTR		0	0
hsa-miR-221-3p	NM_001282535	PNMA3	AGCTACATTGTCTGCTGGGTTTC#GGAGCCCAGTGCCAGCCAGAGGTTGTGCA#.((.(((.(.(((((((((((((#))))))))).......)))).).))))).	2175	2204	1	-21.6	0	0.000101851	0.426	0	0	-10.3815	19	29	9	3UTR		0	0
hsa-miR-221-3p	NM_001282550	BTBD3	AGCTACATTGTCTGCTGGGTTTC#AAGCTCAGCTAATTCAAGACACTGTAGCC#.((((((.((((((((((((((.#))))))))).......))))).)))))).	4252	4281	1	-24.6	1	0.000296045	0.618	0	0	-6.10696	20	29	9	3UTR		0	0
hsa-miR-221-3p	NM_001282629	GBGT1	AGCTACATTGTCTGCTGGGTTTC#GGGCCCGGCAGGCTTGCCACGTTCTGCAGCC#.(((.((..(((((((((((((.#)))))))))))))...........)).))).	1547	1578	1	-22.2	0	5.38631e-05	0.324	0	0	-11.2824	18	31	13	3UTR		0	0
hsa-miR-221-3p	NM_001282648	SLC35A2	AGCTACATTGTCTGCTGGGTTTC#GAGCTAAGATTTTTGCATCAGCCCTTCTGGCAGAAGGTGTGGTA#.((((((((.(((((((((((..#.)))))....)))))).)))))))).	1190	1234	1	-24.1	1	0.000209024	0.559	0	0	-5.03583	19	26	8	3UTR		0	0
hsa-miR-221-3p	NM_001282659	USP47	AGCTACATTGTCTGCTGGGTTTC#GAGCCCGGGGGCGGTGGAGCC#.(((.((((((((.((((((((.#)))))))))))))))).))).	6628	6649	1	-24.5	0	5.09968e-08	0.456	0	0	-8.7692	19	21	16	3UTR		0	0
hsa-miR-221-3p	NM_001282679	GAPVD1	AGCTACATTGTCTGCTGGGTTTC#GGCAGACAGTGTGGGTA#(.((((((((((((((.......#)))))))))))))).).	8958	8975	1	-23.5	1	0.00604344	0.471	0	0	-5.10125	15	17	14	3UTR		0	0
hsa-miR-221-3p	NM_001282689	SECISBP2	AGCTACATTGTCTGCTGGGTTTC#GGGCCCTTTCTCAGGGGATGTAGCTT#(((((((((.((((..((((((.#)))))).....)))).))))))))).	3020	3046	1	-23.9	1	0.00117537	0.529	0	0	-6.14858	19	26	9	3UTR		0	0
hsa-miR-221-3p	NM_001282696	FAM107B	AGCTACATTGTCTGCTGGGTTTC#AACCCAGCTTCAGTAGCA#.(((((..((...((((((((..#))))))))..))))))).	1514	1532	1	-20.1	0	0.00466881	0.574	1.26077	0.597964	-15.1114	15	18	8	3UTR		0	0
hsa-miR-221-3p	NM_001282722	LDAH	AGCTACATTGTCTGCTGGGTTTC#GATCCCAGCACCTTGGGAGGATGAGCTG#((((.((((.(((((((((.((.#)).)))))))......)).)))))))).	3134	3162	1	-21.4	0	0.000314427	0.456	2.19309	1.01589	-9.29912	19	28	8	3UTR		0	0
hsa-miR-221-3p	NM_001282745	ARMC3	AGCTACATTGTCTGCTGGGTTTC#ACTCAGCTGCTGCACCCAGGACAACACTGTGGCC#.(((((((((((..((((((...#.)))))))))))...)))))).	2966	3000	1	-21.4	1	0.000296828	0.471	0	0	-5.9393	17	22	11	3UTR		0	0
hsa-miR-221-3p	NM_001282772	POLR1B	AGCTACATTGTCTGCTGGGTTTC#CTCAGCAGGCAGTGAGTG#.(((.((((((((((((((....#))))))))))))))))).	3941	3959	1	-25.3	0	7.89204e-06	0.456	0	0	-7.91236	17	18	17	3UTR		0	0
hsa-miR-221-3p	NM_001282805	MARCHF7	AGCTACATTGTCTGCTGGGTTTC#GAACACTTGACAATGTGGCTA#((((((((((((......((((.#))))....)))))))))))).	4928	4949	1	-19.4	1	0.00908201	0.662	0	0	-7.05204	16	21	12	3UTR		0	0
hsa-miR-221-3p	NM_001282852	CCNY	AGCTACATTGTCTGCTGGGTTTC#GCCCAGCTGATTTTTGTAGTTT#(((((((..(((.(((((((...#))))))).)))...))))))).	4762	4784	1	-22.6	1	0.0135402	0.5	0	0	-8.59673	17	22	7	3UTR		0	0
hsa-miR-221-3p	NM_001282866	MARCHF8	AGCTACATTGTCTGCTGGGTTTC#GAAGCCTGGTGGGGATGTGGTA#.((((((((.(((((((((((((#))))))))))))))))))))).	4523	4545	1	-24.8	1	0.000406814	0.426	0	0	-5.03583	21	22	21	3UTR		0	0
hsa-miR-221-3p	NM_001282881	RIMS2	AGCTACATTGTCTGCTGGGTTTC#GGCAGACTTTGTAGCTC#(((((((..(((((((.......#)))))))..))))))).	4392	4409	1	-23.1	1	0.000254724	0.515	0	0	-7.3076	14	17	7	3UTR		0	0
hsa-miR-221-3p	NM_001282886	EIF4E3	AGCTACATTGTCTGCTGGGTTTC#AGACTTTAATCAGATAATGTGGCTT#((((((((((((((..((((((.#))))))....)))))))))))))).	6409	6434	1	-22.4	1	0.0201184	0.691	0	0	-4.90607	20	25	14	3UTR		1	0
hsa-miR-221-3p	NM_001282902	TRPS1	AGCTACATTGTCTGCTGGGTTTC#CTCAGACAGACATAGTAGTA#.(((((..(((((((((((....#))))).))))))..))))).	6728	6748	1	-21.9	0	0.0539527	0.706	0	0	-7.65065	16	20	6	3UTR	MIRT006841	1	1
hsa-miR-221-3p	NM_001282925	ABI2	AGCTACATTGTCTGCTGGGTTTC#AAGCTTAGTGGATTAATGAGGCA#.(((.(((((((((((((((((.#))))))))))))).)))).))).	3729	3752	1	-20	0	0.00279862	0.632	0	0	-7.91236	20	23	13	3UTR		0	0
hsa-miR-221-3p	NM_001282929	C19orf12	AGCTACATTGTCTGCTGGGTTTC#GAAGCCCAGCGGATGCCCCCTGGGGAATCTCCACATCATCAGTGTAT#...((((((((((((((((((((#)))))))))))))..........................))))))).	490	537	1	-26	0	0.00373375	0.441	-0.0509096	-0.201814	-6.51454	20	47	13	3UTR	MIRT549568	0	0
hsa-miR-221-3p	NM_001282934	PRDM15	AGCTACATTGTCTGCTGGGTTTC#GAAGCCCAGCCAGAATCCCGAGTGGA#..((((.((((((((((((((((#)))))))))).)))....))))))).	4548	4574	1	-22.8	0	0.00629274	0.515	0	0	-6.50069	20	26	10	3UTR		0	0
hsa-miR-221-3p	NM_001283035	RTF2	AGCTACATTGTCTGCTGGGTTTC#TCCAGCAGATGGTAAAGG#..((..(((((((((((((....#)))))))))))))..)).	1819	1837	1	-18.7	0	0.000176243	0.515	0	0	-10.977	15	18	13	3UTR		0	0
hsa-miR-221-3p	NM_001283038	PGAP2	AGCTACATTGTCTGCTGGGTTTC#GAGGCCCCAAGAAGCTGAGCTGGCAGAGAGCTC#((((.(.(((((.(((.((((((#.)))))).))).))))).))))).	1179	1212	1	-22.3	0	7.45014e-05	0.5	0.0230818	0.641121	-10.8894	19	24	6	3UTR		0	0
hsa-miR-221-3p	NM_001283043	RALGAPA1	AGCTACATTGTCTGCTGGGTTTC#AGCCCAGCAGTGATCAGCAGTAGCC#.(((((..(((((((((((((..#))))))))))......)))))))).	6792	6817	1	-23.4	0	0.026362	0.485	0	0	-7.65065	18	25	10	3UTR		1	1
hsa-miR-221-3p	NM_001283051	ICOSLG	AGCTACATTGTCTGCTGGGTTTC#CCCAGCGGAGTGTGGG#..((((((..(((((((((....#))))))))))))))).	3785	3801	1	-23	1	3.73294e-07	0.382	0	0	-7.2559	15	16	15	3UTR		0	0
hsa-miR-221-3p	NM_001283054	STMN4	AGCTACATTGTCTGCTGGGTTTC#CCAGCAGATTCAGTGTCTGGTGAGGGCTT#((((((((((((((((((.....#))))))))..))))))........)))).	1688	1717	1	-21.3	1	0.000407531	0.529	0	0	-3.93757	18	29	8	3UTR		0	0
hsa-miR-221-3p	NM_001283056	CCDC198	AGCTACATTGTCTGCTGGGTTTC#GAACCCAGGAGATAGAGGTTGCA#.((.((.((((((.((((((((.#)))))))).))))))..)).)).	2074	2097	1	-23.6	0	0.00166811	0.515	0	0	-9.22587	18	23	8	3UTR		0	0
hsa-miR-221-3p	NM_001284207	DCAF5	AGCTACATTGTCTGCTGGGTTTC#GGAGCCCAGCTGGGATTGGTGTAGG#..((((((.((((((((((((((#))))))))))..))))..)))))).	4260	4285	1	-26.1	1	0.000553813	0.397	1.72946	1.82552	-6.01339	20	25	10	3UTR		0	0
hsa-miR-221-3p	NM_001284212	CAST	AGCTACATTGTCTGCTGGGTTTC#GACTTAGCTGACTTGTGGCA#.((((((..(((.((((((((..#)))))))).))).)))))).	3415	3435	1	-22.4	1	0.000401893	0.574	0	0	-8.45248	17	20	8	3UTR		0	0
hsa-miR-221-3p	NM_001284306	ZNF106	AGCTACATTGTCTGCTGGGTTTC#AATCTAGGAGATAATGAATGGCC#.((((((((((((.(((((((..#))))))).))))))))..)))).	5722	5745	1	-21.1	1	0.0860979	0.676	0	0	-4.65016	19	23	8	3UTR		0	0
hsa-miR-221-3p	NM_001284313	DBNL	AGCTACATTGTCTGCTGGGTTTC#GAGGCCCAGAGATGGAGGTGGCTT#((((((.((((((.(((((((((#)))))))))))))))..)))))).	4702	4726	1	-25.9	0	5.74809e-05	0.412	0	0	-6.3381	21	24	15	3UTR		1	0
hsa-miR-221-3p	NM_001284316	ACSF3	AGCTACATTGTCTGCTGGGTTTC#GGAGCCCACAGGCGTGGCC#.(((((...(((((.((((((((#)))))))))))))))))).	2044	2063	1	-23.6	0	1.01393e-05	0.397	0	0	-9.44249	18	19	18	3UTR		0	0
hsa-miR-221-3p	NM_001284317	CRELD2	AGCTACATTGTCTGCTGGGTTTC#CCCGTGGAAAATGTGGCC#.((((((((.(((((.(((....#)))))))).)))))))).	1152	1170	1	-20.3	1	0.00561468	0.5	0	0	-5.26888	16	18	8	3UTR		0	0
hsa-miR-221-3p	NM_001284320	OPALIN	AGCTACATTGTCTGCTGGGTTTC#ATCCAGCAGCTCCATGAGCC#.(((.(((.(.(((((((((...#)))))))))..).)))))).	2541	2561	1	-19.1	0	0.000604694	0.559	0	0	-11.7935	16	20	9	3UTR		0	0
hsa-miR-221-3p	NM_001284341	FKBP9	AGCTACATTGTCTGCTGGGTTTC#GAGAGTCAAAGGGCTTGCTTGCCCCAGCAGAGTTCCCAGCAGACAGCCATGGCTC#(((((..((((((((((((.(((#.)))..))))))))))))...))))).	2450	2505	1	-26.8	0	3.04743e-05	0.426	1.246	0.683781	-7.38222	20	27	12	3UTR		1	0
hsa-miR-221-3p	NM_001284356	PINX1	AGCTACATTGTCTGCTGGGTTTC#GAGGCCCAGGAGCGAGTGGCC#.(((((.(((.((.(((((((((#))))))))).)))))))))).	771	792	1	-26.5	0	5.41001e-05	0.338	2.80323	2.11456	-9.01863	19	21	10	3UTR		0	0
hsa-miR-221-3p	NM_001284367	NDUFB8	AGCTACATTGTCTGCTGGGTTTC#AACTCAGAGTGGGGTGTAGCC#.((((((((.(((.(((((((..#))))))))).).)))))))).	628	649	1	-19.5	1	0.000171269	0.559	0.0042707	0.132317	-5.89267	18	21	9	3UTR		0	0
hsa-miR-221-3p	NM_001285444	PDXDC1	AGCTACATTGTCTGCTGGGTTTC#GGCTCAGCCAGAGGCGAAGTGGA#..((((.((((((((((((((..#))))))))...)))))).)))).	4366	4389	1	-20.2	0	0.000409679	0.5	1.47473	1.74317	-6.50069	18	23	8	3UTR		0	0
hsa-miR-221-3p	NM_001286059	RAB30	AGCTACATTGTCTGCTGGGTTTC#GAGATCTGGCGATGACTGTGGCTC#((((((((((((.((((((((((#))))))))))))))).))))))).	785	809	1	-23.6	1	3.65294e-05	0.397	-0.421281	0.589448	-5.22671	22	24	15	3UTR		0	0
hsa-miR-221-3p	NM_001286067	C11orf54	AGCTACATTGTCTGCTGGGTTTC#GGAGCCCAGGAGTTTGAGACCAGCTTGGGCAACATAGCA#.((((..((((((.(((((((((#))))))))).))................))))..)))).	1398	1437	1	-21.7	0	0.000550775	0.574	0.555979	0.981761	-8.09481	19	39	9	3UTR		0	0
hsa-miR-221-3p	NM_001286072	MOV10	AGCTACATTGTCTGCTGGGTTTC#GAACCCAGCTGAACTGCCCCTCCAAGGGACAGGAAGGCTG#((((...(((((((((((((((.#))))))))).................))))))...)))).	4194	4234	1	-22.9	0	1.97387e-06	0.412	0	0	-11.5013	19	40	9	3UTR		0	0
hsa-miR-221-3p	NM_001286095	TMEM9B	AGCTACATTGTCTGCTGGGTTTC#GAAACAGGCAGACAACTGG#.....(((((((((((..(((((#))))).))))))))).)).	579	598	1	-18.7	0	0.00409462	0.559	0.810339	1.10074	-13.6656	16	19	9	3UTR		0	0
hsa-miR-221-3p	NM_001286116	CCDC90B	AGCTACATTGTCTGCTGGGTTTC#GAGGCCTGGCCCAGTAGAGCAATGC#.....((((((((((((((((..#.))))))))))).))))).	2909	2934	1	-23.4	0	0.00232581	0.471	0	0	-13.6656	16	19	11	3UTR		0	0
hsa-miR-221-3p	NM_001286205	GAS8	AGCTACATTGTCTGCTGGGTTTC#CTCGGTAGGTGATGTAGG#..(((((((((((((((((....#))))))))))))))))).	2178	2196	1	-20.6	1	0.0105479	0.412	-0.340088	2.29829	-4.957	17	18	17	3UTR		0	0
hsa-miR-221-3p	NM_001286216	GTPBP2	AGCTACATTGTCTGCTGGGTTTC#AAACCTGGCAACCCTGTGGCC#.((((((..((.((((((((((.#))))))))))))..)))))).	1936	1957	1	-21.4	1	1.45787e-05	0.412	3.01711	2.83149	-10.5102	18	21	12	3UTR		0	0
hsa-miR-221-3p	NM_001286234	SLC2A14	AGCTACATTGTCTGCTGGGTTTC#GAAATCTAGGATTATTAACTAATATGGGCATTGTAGTTA#(((((((.(((((((((((((((#)))))))))...............)))))).))))))).	2486	2525	1	-20	1	0.00158512	0.662	2.46867	3.32545	-6.25121	22	39	9	3UTR		0	0
hsa-miR-221-3p	NM_001286259	ADAT2	AGCTACATTGTCTGCTGGGTTTC#AGCCCAGAGACTGTCGCTA#(((.(((..((((.(((((((..#)))))))))))))).))).	3510	3529	1	-20.2	0	0.000872627	0.662	0	0	-11.1965	17	19	14	3UTR		0	0
hsa-miR-221-3p	NM_001286349	KIRREL1	AGCTACATTGTCTGCTGGGTTTC#ACCCAGGAAGCAAGTAGCTC#((((((.((((.(.((((((...#)))))).).)))))))))).	3896	3916	1	-22.5	0	0.00623166	0.574	0	0	-9.6849	17	20	10	3UTR		0	0
hsa-miR-221-3p	NM_001286367	NOP9	AGCTACATTGTCTGCTGGGTTTC#AGGCCTTGCAGCAGTGTGGA#..((((((((.((((.((((((.#)))))).)))))))))))).	2481	2501	1	-23.4	1	3.26158e-06	0.412	1.28934	1.95168	-8.01482	18	20	12	3UTR		1	0
hsa-miR-221-3p	NM_001286371	VTA1	AGCTACATTGTCTGCTGGGTTTC#GAAATCCCAGTTGTCTATGTGGCC#.(((((((.(.(.((((((((((#)))).)))))).).).))))))).	2858	2882	1	-23	1	0.0118848	0.559	1.85017	2.22107	-8.96362	19	24	7	3UTR		0	0
hsa-miR-221-3p	NM_001286374	TOMM40L	AGCTACATTGTCTGCTGGGTTTC#GGACCCAGGAGCAGAGTGGTG#.(((((.(((.((.((((((((.#)))))))).))))).))))).	1049	1070	1	-23.3	0	0.00230978	0.412	0	0	-9.01863	18	21	8	3UTR		0	0
hsa-miR-221-3p	NM_001286389	TMEM179	AGCTACATTGTCTGCTGGGTTTC#AGGCCTGGGAGACCCTGTGGCC#.((((((..((((.((((((((.#)))))))).))))..)))))).	1270	1292	1	-24.3	1	0.000104057	0.324	0	0	-8.02019	18	22	8	3UTR		0	0
hsa-miR-221-3p	NM_001286403	CIITA	AGCTACATTGTCTGCTGGGTTTC#GAGACCTGGCAGACAC#........(((((((((((((((#))))))))))))))).	13537	13553	1	-24.1	0	0.0040463	0.588	0	0	-19.4239	15	16	15	3UTR		0	0
hsa-miR-221-3p	NM_001286414	TUBGCP4	AGCTACATTGTCTGCTGGGTTTC#GGGCCTGGGAGTTCGAGACCAGCCTGGGCAATGTGGTG#.(((((((((((((((.((((((#.)))))))))..)))))))))))).	5305	5343	1	-26.6	1	0.000170276	0.471	0	0	-3.79332	21	25	12	3UTR		0	0
hsa-miR-221-3p	NM_001286427	GLB1L	AGCTACATTGTCTGCTGGGTTTC#AGCCTGGCTGACAGTGAGA#..((.(((((((.((((((((..#)))))))).))))))))).	2012	2031	1	-21.6	0	0.000116201	0.588	5.33088	3.33571	-10.3652	17	19	9	3UTR		0	0
hsa-miR-221-3p	NM_001286429	THSD4	AGCTACATTGTCTGCTGGGTTTC#AAACCCACAGACATGCAGGCTA#((((....((((((.(((((((.#)))))))))))))....)))).	6171	6193	1	-22.2	0	0.00671432	0.515	0	0	-14.5503	17	22	13	3UTR		0	0
hsa-miR-221-3p	NM_001286458	USP7	AGCTACATTGTCTGCTGGGTTTC#TCCGGACAGACATTGTGGG#..(((((.(((((((((((....#))))).)))))).))))).	4098	4117	1	-22.4	0	0.00268586	0.603	5.4111	5.89553	-7.27064	16	19	6	3UTR		0	0
hsa-miR-221-3p	NM_001286487	TMEM87A	AGCTACATTGTCTGCTGGGTTTC#GACATCTGCTATTGTGACACATCCCATTGCTGGCAATGTGGTG#.(((((((((((.((((((....#.))))..)).))))))))))).	2495	2538	1	-23	1	6.49812e-05	0.574	2.08823	2.21885	-5.08246	17	22	11	3UTR		0	0
hsa-miR-221-3p	NM_001286496	PIF1	AGCTACATTGTCTGCTGGGTTTC#GGGCCCCAGGGAATAACTGGAGTAGGCAGGCAGTGTC#....((((((((((((((((((.#))))))..................)))))))))))).	2093	2130	1	-21.7	0	0.00123693	0.456	1.27673	1.08881	-9.54656	18	37	12	3UTR		0	0
hsa-miR-221-3p	NM_001286521	PARP11	AGCTACATTGTCTGCTGGGTTTC#AACTTGGCGGGCATGTTGCA#.((.(((.(((((((((((((..#)))))))))))))))).)).	2234	2254	1	-21.3	0	0.000318247	0.471	0	0	-9.13898	18	20	16	3UTR		0	0
hsa-miR-221-3p	NM_001286535	RAD9B	AGCTACATTGTCTGCTGGGTTTC#GAGCCCAGCAGTTCAAGACTAGCC#.((((..(((.(((((((((((.#)))))))))))..)))...)))).	3097	3121	1	-24.7	0	0.000256396	0.441	0.0635365	-0.0317655	-10.0627	18	24	11	3UTR		0	0
hsa-miR-221-3p	NM_001286555	DUSP22	AGCTACATTGTCTGCTGGGTTTC#ACCCGGAAAGGGGAGTGTGGCTG#(((((((((.(((.((((((...#))))))...))).))))))))).	2309	2332	1	-24.2	1	0.000228387	0.456	-0.123791	0.194359	-6.03692	18	23	9	3UTR		0	0
hsa-miR-221-3p	NM_001286561	NUMA1	AGCTACATTGTCTGCTGGGTTTC#GGCCCAGGGGGCCTGGAGCATGGACAGTGTGGG#..(((((((((((((((((((((#.)))))))..))))..)))))))))).	6778	6811	1	-24.3	1	0.000350383	0.368	0	0	-4.957	21	27	10	3UTR		0	0
hsa-miR-221-3p	NM_001286649	STK24	AGCTACATTGTCTGCTGGGTTTC#GAAACCCCGCAGTGGAACGCTGTGTGCTG#(((((((.(((((((.(((((((#))))))).))))....))).)))).))).	5822	5851	1	-22.9	1	0.00031352	0.515	0	0	-6.48426	21	29	7	3UTR		0	1
hsa-miR-221-3p	NM_001286711	ACSL1	AGCTACATTGTCTGCTGGGTTTC#GAACCATGCAGATAAGGAGCC#.(((...((((((((..(((((.#)))))..))))))))..))).	2724	2745	1	-21.1	0	0.00117102	0.456	3.03099	3.36021	-11.5901	16	21	8	3UTR		0	0
hsa-miR-221-3p	NM_001286730	SLC44A1	AGCTACATTGTCTGCTGGGTTTC#GCCCCACAGACACAGTTGTAGCC#.((((((.((((((..((((...#))))..))))))....)))))).	9207	9230	1	-21.2	1	0.0721356	0.529	0	0	-7.07546	16	23	6	3UTR		0	0
hsa-miR-221-3p	NM_001286745	OTUD6B	AGCTACATTGTCTGCTGGGTTTC#GAAAAATGGGGTGTCAGTCTTTTCACACGCCCAGCAGGTAACAATGTGGG#..((((((((((((((((((...#.)))))))))...))))))))).	2455	2505	1	-28.3	1	0.0260946	0.515	0	0	-4.957	18	23	9	3UTR		0	0
hsa-miR-221-3p	NM_001286754	SYNPO2	AGCTACATTGTCTGCTGGGTTTC#GAGACTTAGCAGAAAATACTTGGCTT#(((((.(((.(((((((((((((#))))))))))))).)))...))))).	6055	6081	1	-22.7	0	0.00146069	0.588	0	0	-7.08104	21	26	13	3UTR		0	0
hsa-miR-221-3p	NM_001286777	CRISPLD1	AGCTACATTGTCTGCTGGGTTTC#ATTCCTAGTGATCATGTAGTA#.(((((((.(((.((((((....#.))))))))).))))))).	2046	2067	1	-18.9	1	0.0315775	0.574	0	0	-6.13885	16	19	9	3UTR		0	0
hsa-miR-221-3p	NM_001286782	PCMTD1	AGCTACATTGTCTGCTGGGTTTC#GAAGCCCAAGCAATGTAT#...(((((((.((..((((((((#))))))))))))))))).	2383	2401	1	-18.9	0	0.0109898	0.632	2.08546	0.95928	-10.9316	17	18	17	3UTR		1	1
hsa-miR-221-3p	NM_001286792	SPATA13	AGCTACATTGTCTGCTGGGTTTC#AAGCCCAGTCTCTACTAATAATACAAAAATTAGCTGGGCATGGTGGCG#.(((((..((((((((((((((.#)))))))))..........................)))))..))))).	5264	5312	1	-24.2	0	0.000140653	0.529	0	0	-7.65065	19	48	9	3UTR		0	0
hsa-miR-221-3p	NM_001286805	TBC1D14	AGCTACATTGTCTGCTGGGTTTC#AGCTCAGTGGAAGGATGAGCTG#((((.((((.(((((((((((..#)))))))))))..)))))))).	1487	1509	1	-21.4	0	3.32524e-05	0.426	0	0	-9.29912	19	22	11	3UTR		0	0
hsa-miR-221-3p	NM_001286835	CBWD5	AGCTACATTGTCTGCTGGGTTTC#CAGCATACATAAAATGTAGCA#.((((((((((.(((((......#))))).)))....))))))).	2470	2491	1	-18.4	1	0.00964794	0.75	0	0	-7.14013	15	21	7	3UTR		0	1
hsa-miR-221-3p	NM_001286838	GRID2	AGCTACATTGTCTGCTGGGTTTC#GGAGCCCTTAAGAACTATTGATGTGGCC#.((((((((((((...(((((((#)))))))...))).....))))))))).	4204	4232	1	-20.7	1	0.0133864	0.574	2.55191	0.827947	-5.61866	19	28	9	3UTR		0	0
hsa-miR-221-3p	NM_001286839	FARP1	AGCTACATTGTCTGCTGGGTTTC#GAACCCAGCAAGAAGTGGCC#.(((((.((.(.((((((((((.#))))))))))).))))))).	5604	5624	1	-22.9	0	0.00554635	0.471	0	0	-9.92632	18	20	11	3UTR		0	0
hsa-miR-221-3p	NM_001287003	ST6GALNAC6	AGCTACATTGTCTGCTGGGTTTC#GAGGCCCGGCCAGAGAATTTGTGGG#..(((((((.(((((((((((((#)))))))))).))).))..))))).	1200	1225	1	-24.8	1	0.000253131	0.368	-0.279693	0.161084	-6.19951	20	25	10	3UTR		0	0
hsa-miR-221-3p	NM_001287005	SUSD3	AGCTACATTGTCTGCTGGGTTTC#GGACCCCAGTGGGGAGTGTTCTGTTCCGGCA#.((((((((.(((((((((.(((#))).))))))))).)))))........))).	1097	1128	1	-22.4	1	0.00170137	0.5	1.3318	0.495083	-5.03583	20	31	9	3UTR		0	0
hsa-miR-221-3p	NM_001287147	MOGAT3	AGCTACATTGTCTGCTGGGTTTC#GAACCCAGGAGGCAGAGGTTGCA#.((.((.((((((.((((((((.#)))))))).))))))..)).)).	1637	1660	1	-24.9	0	3.00354e-05	0.412	0.345326	0.434286	-9.22587	18	23	8	3UTR		0	0
hsa-miR-221-3p	NM_001287337	CAB39L	AGCTACATTGTCTGCTGGGTTTC#GATGCCCAGCAGGCACAAACCATGGGTC#.(((.(((((((((((((((.((#)).))))))))))))......)))))).	2350	2378	1	-24	0	0.00483498	0.426	5.03819	3.65694	-7.91236	20	28	12	3UTR		0	0
hsa-miR-221-3p	NM_001287437	JADE1	AGCTACATTGTCTGCTGGGTTTC#GAAGCTGAGGGGACAGGGTAGA#..((((.((((((.((.((((((#)))))).)).)))))).)))).	3295	3317	1	-23.7	0	0.00983356	0.574	0	0	-7.35753	18	22	6	3UTR		0	0
hsa-miR-221-3p	NM_001287491	TET3	AGCTACATTGTCTGCTGGGTTTC#GGAGCTCAGCAGACCAGTGTAA#...((((((((((((((((((((#)))))))))))))).)))))).	7217	7239	1	-28.2	0	0.0021431	0.515	0	0	-6.51454	20	22	14	3UTR		0	0
hsa-miR-221-3p	NM_001287497	TMEM168	AGCTACATTGTCTGCTGGGTTTC#GAACCCGGGAGGCAGAGGTTGCA#.((.((.((((((.((((((((.#)))))))).))))))..)).)).	4835	4858	1	-24.2	0	1.7395e-05	0.426	0	0	-9.22587	18	23	8	3UTR	MIRT024146	0	0
hsa-miR-221-3p	NM_001287501	IQCE	AGCTACATTGTCTGCTGGGTTTC#GGGCCCGGTGTTGGACAAAGTAGCTT#((((((.(((((((((((((((.#)))))))))...)))))).)))))).	5966	5992	1	-26.6	0	0.000196473	0.544	0	0	-5.48126	21	26	9	3UTR	MIRT046936	0	0
hsa-miR-221-3p	NM_001287512	TTC26	AGCTACATTGTCTGCTGGGTTTC#AGACCCAGACTTAGGCATGTAGTG#.((((((.((((((((((((((.#))))))))...)))))))))))).	3725	3749	1	-23.4	1	0.028246	0.559	3.34207	1.81252	-6.10696	20	24	12	3UTR		0	0
hsa-miR-221-3p	NM_001287755	DCUN1D4	AGCTACATTGTCTGCTGGGTTTC#AGCTCTGCTTGCTGTGTGGCA#.(((((((.((..((.(((((..#))))).))..)).))))))).	1167	1188	1	-19.1	1	0.00016851	0.529	3.65996	2.86574	-9.7187	16	21	7	3UTR		1	1
hsa-miR-221-3p	NM_001287758	COL4A6	AGCTACATTGTCTGCTGGGTTTC#AGCCAGAGACAGAGGATGTGGCC#.((((((((.((((((.((((..#))))..)).)))).)))))))).	6050	6073	1	-23.2	1	0.00297716	0.426	0	0	-5.03583	18	23	8	3UTR		0	0
hsa-miR-221-3p	NM_001287802	TBCE	AGCTACATTGTCTGCTGGGTTTC#TCCAGCAATGTAGCA#.(((((((....(((((((....#)))))))))))))).	3830	3845	1	-19.6	1	0.00223866	0.632	0	0	-12.2638	14	15	14	3UTR		0	0
hsa-miR-221-3p	NM_001287821	ZWILCH	AGCTACATTGTCTGCTGGGTTTC#GGACACAGAGGGAGCAGACAGTGGGTA#.(((.(((((((((((.......#.)))))))))))))).	2096	2123	1	-19.9	0	0.00285942	0.471	0	0	-7.91236	14	16	14	3UTR		0	0
hsa-miR-221-3p	NM_001288614	CST3	AGCTACATTGTCTGCTGGGTTTC#GACCCGTGCTACAATGTGGA#..(((((((((..((((((((..#)))))).)).))))))))).	2638	2658	1	-21.5	1	0.000341926	0.603	1.16561	2.02329	-9.59293	17	20	9	3UTR		0	0
hsa-miR-221-3p	NM_001288630	EPHA7	AGCTACATTGTCTGCTGGGTTTC#CCTAGCATTATGTGGCTA#((((((((....(((((((....#)))))))..)))))))).	1791	1809	1	-20.7	1	0.00149418	0.721	0	0	-12.408	15	18	8	3UTR		0	0
hsa-miR-221-3p	NM_001288731	DAPK1	AGCTACATTGTCTGCTGGGTTTC#GAAGCAAGGGGGTGATGTAGCC#.(((((((((.((.((..(((((#)))))..)).))))))))))).	4515	4537	1	-21.1	1	1.8398e-05	0.441	0	0	-7.47494	18	22	11	3UTR		0	0
hsa-miR-221-3p	NM_001288745	CMTM5	AGCTACATTGTCTGCTGGGTTTC#GGCTCCTAGGCCCAGCCAGCCAGAGAGGACAGTGGAGCC#.(((.(((((((((((((((((.#.)))))))))..........)))))))).))).	445	484	1	-26.5	0	0.000104889	0.368	1.50125	1.37945	-7.91236	20	33	9	3UTR		0	0
hsa-miR-221-3p	NM_001288753	SMC4	AGCTACATTGTCTGCTGGGTTTC#GAGAGCCAGTAAATTAGGACAGTGTTTCAACAAGCCTAGGCTA#((((((((((((((((((.((((#)))).)))))......))))))))).............)))).	4443	4486	1	-22.9	1	0.000194187	0.618	0	0	-3.93757	22	43	9	3UTR		0	0
hsa-miR-221-3p	NM_001288770	C17orf80	AGCTACATTGTCTGCTGGGTTTC#GATTTAGATCTAAACAAACTCAGCATGACGAGGAAGCA#.(((.(.(((((((((((((((.#.)))))))))).))))).).))).	2599	2637	1	-23.5	0	0.00125833	0.559	-0.00429709	0.147992	-9.45605	19	24	10	3UTR		0	0
hsa-miR-221-3p	NM_001288778	E4F1	AGCTACATTGTCTGCTGGGTTTC#GGCCTGGTAGAGAAGATGGCA#.((((..((.(((((((((((..#))))))))))).))..)))).	1919	1940	1	-22	0	0.00682572	0.353	0	0	-8.48048	17	21	11	3UTR		0	0
hsa-miR-221-3p	NM_001288786	TOM1L2	AGCTACATTGTCTGCTGGGTTTC#AGAGCCAGCAGCAAACAGCTTTGTGGCA#.((((((..(((((((((.(((.#))).)))))))......))..)))))).	2484	2512	1	-23.7	1	0.000415834	0.441	0	0	-7.16335	18	28	7	3UTR		0	0
hsa-miR-221-3p	NM_001288802	NFATC4	AGCTACATTGTCTGCTGGGTTTC#CCCAGCTGAGGTGTGGCC#.(((((((..((.((((((....#)))))).)).))))))).	3900	3918	1	-23.3	1	5.4206e-07	0.324	0	0	-7.38135	15	18	7	3UTR		0	0
hsa-miR-221-3p	NM_001288964	CEP70	AGCTACATTGTCTGCTGGGTTTC#GGAGCCCAGGGAGACAGATTGCAAGTAGTA#.(((((.((((((.(((((((((#)))))))))..)))))).......))))).	2237	2267	1	-22.7	0	0.0143403	0.588	0	0	-6.19385	20	30	9	3UTR		0	1
hsa-miR-221-3p	NM_001288979	LIPA	AGCTACATTGTCTGCTGGGTTTC#TCCGGTGGACAAA#.......((((((((((((....#)))))))))))).	2100	2113	1	-16.5	0	8.12754e-05	0.662	0	0	-17.1102	12	13	12	3UTR		0	0
hsa-miR-221-3p	NM_001288996	LIN54	AGCTACATTGTCTGCTGGGTTTC#GAAACTCAGCCGGGCATGGTGGCTC#((((((..(((((((((((((((#)))))))))).)))))..)))))).	4954	4979	1	-29.7	0	4.91746e-05	0.485	0	0	-7.7949	21	25	10	3UTR		0	0
hsa-miR-221-3p	NM_001289023	LAIR1	AGCTACATTGTCTGCTGGGTTTC#GAAGAGCCATGTTTAATTCACCTGGCAGTGCAGTGTGGCC#.(((((((((((((((((((...#.))))))))).)))))))))).	3845	3885	1	-29.1	1	0.000353234	0.426	0	0	-3.79332	19	22	10	3UTR		0	0
hsa-miR-221-3p	NM_001289053	PIGG	AGCTACATTGTCTGCTGGGTTTC#CCCAGCAGAGGTGTGGG#..((((((..(((((((((....#))))))))).)))))).	2638	2655	1	-24.9	1	5.98781e-06	0.412	2.81054	2.59321	-7.2559	15	17	9	3UTR		0	0
hsa-miR-221-3p	NM_001289077	DCLRE1C	AGCTACATTGTCTGCTGGGTTTC#GCCCAGCCTGGGCAACAAAGCA#.(((...(((((((((((((...#)))))))..))))))...))).	3772	3794	1	-21.6	0	0.0003731	0.559	0.270551	0.258613	-11.357	16	22	7	3UTR		0	0
hsa-miR-221-3p	NM_001289165	LOXL3	AGCTACATTGTCTGCTGGGTTTC#GATTCTTCAGAGCCCAGGAGTCAGTGCTGGTG#.(((((((((.((.((((((((.#.)))))))).)).))))).)))).	1979	2011	1	-25.6	1	6.53309e-05	0.441	0	0	-7.47494	19	24	8	3UTR		0	0
hsa-miR-221-3p	NM_001289181	ZNF302	AGCTACATTGTCTGCTGGGTTTC#GAAACCCAATAGTGTGGTAAGTGTGGA#..(((((((..((((((((((((#)))))))).....))))..))))))).	1896	1923	1	-21.4	1	0.00170529	0.632	4.30975	2.48777	-9.02428	19	27	8	3UTR		0	0
hsa-miR-221-3p	NM_001289414	ANAPC11	AGCTACATTGTCTGCTGGGTTTC#GAGGCCTCTGGGTGCCTGTGTTCTCGGCATATAGATGTGGTC#.((((((((...(((((((....#.)))))))....)))))))).	584	626	1	-18.6	1	0.00223719	0.529	-0.286477	0.123661	-11.2074	15	21	8	3UTR		0	0
hsa-miR-221-3p	NM_001289937	ERBB2	AGCTACATTGTCTGCTGGGTTTC#AGACCCAGGGGGAGAATGGGTG#.(((.((((.(((.((((((((.#))))))))..))).))))))).	4207	4229	1	-20.1	0	0.0180502	0.5	1.65313	2.55954	-10.0117	18	22	8	3UTR		0	0
hsa-miR-221-3p	NM_001290040	ROBO2	AGCTACATTGTCTGCTGGGTTTC#GAATCCAGTTCAAGGGAGAATGTAGA#..(((((((.((((((((((((.#))))))))).....))).))))))).	8108	8134	1	-21.8	1	0.00691623	0.647	0	0	-6.19951	19	26	9	3UTR		0	0
hsa-miR-221-3p	NM_001290194	MYADM	AGCTACATTGTCTGCTGGGTTTC#CCCAGTGGAGGAAGGTGTGCA#.(((((.((.(((((((((....#))))))))).))..))).)).	1809	1830	1	-20.5	0	0.000470585	0.544	-0.262937	0.0956603	-6.57952	16	21	9	3UTR		0	0
hsa-miR-221-3p	NM_001290263	DOCK10	AGCTACATTGTCTGCTGGGTTTC#GAAATTCCAGTGAATGTGTAGCTC#((((((((..((.((((((((((#))))).)))))))..)))))))).	6862	6886	1	-21.2	1	0.0033893	0.632	0	0	-7.5256	20	24	8	3UTR		0	0
hsa-miR-221-3p	NM_001290264	SLC35E2B	AGCTACATTGTCTGCTGGGTTTC#CCCCGTCGAGAATGTGGCTG#(((((((((.((.((.(((....#))).)).)).))))))))).	4521	4541	1	-22.1	1	0.00082132	0.397	0	0	-6.70226	16	20	9	3UTR		0	0
hsa-miR-221-3p	NM_001290983	DLG1	AGCTACATTGTCTGCTGGGTTTC#GATTTAGTAGACTTTGAGCA#.(((.((..((((((((((((..#))))))))))))..))))).	3403	3423	1	-20.1	0	0.00893447	0.632	0	0	-11.2824	17	20	12	3UTR		0	0
hsa-miR-221-3p	NM_001291694	NR2C2	AGCTACATTGTCTGCTGGGTTTC#GGCCCAGCAGTAGTTGCTC#(((...((((.((((((((((..#)))))))))))))).))).	7148	7167	1	-20.7	0	0.00022746	0.353	0	0	-15.8144	17	19	14	3UTR		0	0
hsa-miR-221-3p	NM_001291823	KLRF1	AGCTACATTGTCTGCTGGGTTTC#GAAACCTGCAGCAGTGTT#....((((((.((((.(((((((#))))))))))))))))).	315	333	1	-20.9	0	0.00235286	0.662	0.563799	0.697167	-12.6044	17	18	17	3UTR		0	0
hsa-miR-221-3p	NM_001291858	IGF1R	AGCTACATTGTCTGCTGGGTTTC#AGCCTGGCGGACAGGCTT#((((....(((((((((((((..#))))))))))))))))).	6051	6069	1	-22	0	3.02519e-07	0.309	0	0	-13.8149	17	18	17	3UTR		0	0
hsa-miR-221-3p	NM_001291869	IGF2BP2	AGCTACATTGTCTGCTGGGTTTC#AAGCCTGGCCAGGCAAAGCTGCTT#(((..(.(((((((((((((((.#))))))))).)))))).)..))).	4104	4128	1	-21.1	0	6.14616e-05	0.515	1.6107	2.69938	-12.6323	19	24	9	3UTR		1	0
hsa-miR-221-3p	NM_001291929	NOX4	AGCTACATTGTCTGCTGGGTTTC#GAAACTCAGCGGAATCAATCAGCTG#((((..(((((((((((((((((#)))))))))))))..)))).)))).	1796	1821	1	-24.3	0	0.00110819	0.647	4.59781	5.44863	-9.95757	21	25	13	3UTR		0	0
hsa-miR-221-3p	NM_001291931	TSNARE1	AGCTACATTGTCTGCTGGGTTTC#GATACCCAGCACGGCTGACAGTGGCC#.(((((...(((((((((((.((#)).)))))))).))).....))))).	3113	3139	1	-24.4	0	0.000129763	0.545	0	0	-8.70704	18	26	8	3UTR		0	0
hsa-miR-221-3p	NM_001291970	POLH	AGCTACATTGTCTGCTGGGTTTC#GAACCCGGGAGGCGGAGCTT#((((...((((((.((((((((.#)))))))).)))))))))).	3972	3992	1	-22.4	0	3.90184e-05	0.353	0	0	-12.3581	18	20	10	3UTR		0	0
hsa-miR-221-3p	NM_001292049	STAC	AGCTACATTGTCTGCTGGGTTTC#AGCCCAGTGCAAGGTTCAGATCCATGTAGCTA#((((((((.((((((((((((..#))))))).........)))))..)))))))).	1522	1554	1	-23.4	1	0.0127746	0.515	0	0	-4.99396	20	32	8	3UTR		0	0
hsa-miR-221-3p	NM_001293274	CACHD1	AGCTACATTGTCTGCTGGGTTTC#GAAAAATCTGCTCACCCAGAGACTGGAATGTGGCA#.((((((((((((.((((((...#.))))))))))...)))))))).	4441	4476	1	-24.9	1	0.00773141	0.559	0	0	-4.65016	18	23	10	3UTR		0	0
hsa-miR-221-3p	NM_001293298	CEMIP	AGCTACATTGTCTGCTGGGTTTC#GAGGCCCAGCAGAGGGAGTAGG#..((((.((.(((((((((((((#))))))))))))).)).)))).	6184	6206	1	-30.3	0	8.57876e-05	0.426	0	0	-7.74319	19	22	13	3UTR		0	0
hsa-miR-221-3p	NM_001293562	AZIN2	AGCTACATTGTCTGCTGGGTTTC#CTCATGAGGCAATGTGGCA#.((((((((((((..((((....#))))..)))))))))))).	3408	3427	1	-23.7	1	0.0042937	0.485	3.89402	3.08361	-5.38561	16	19	12	3UTR		0	0
hsa-miR-221-3p	NM_001293642	CA12	AGCTACATTGTCTGCTGGGTTTC#GAGGCCTATGGCATGTGTGGCTG#((((((((((((...((((((((#)))))))).)))).)))))))).	3912	3935	1	-22.7	1	0.000467115	0.426	0	0	-6.81899	20	23	8	3UTR		0	0
hsa-miR-221-3p	NM_001293643	PGF	AGCTACATTGTCTGCTGGGTTTC#CCCAGCTGAAGGCAGTGGCA#.(((((..(((((((((((....#))))))...)))))))))).	1779	1799	1	-22.1	0	0.00240865	0.309	0.533481	0.0057741	-7.65065	16	20	10	3UTR		0	0
hsa-miR-221-3p	NM_001293735	LYRM7	AGCTACATTGTCTGCTGGGTTTC#GAACCCGGTAGGCAGATGTTGCA#.((.((((((((((((((((((.#))))))))))))))).))).)).	4320	4343	1	-27.9	0	0.000145543	0.426	0	0	-6.82535	20	23	15	3UTR		0	0
hsa-miR-221-3p	NM_001294332	SDHA	AGCTACATTGTCTGCTGGGTTTC#GGAACCCAGTGGCCAGGGAGCGTGGCA#.(((((.((.(((((((((((((#)))))))))....)))).)).))))).	2044	2071	1	-25.7	0	2.79053e-07	0.426	0.0744801	0.0869715	-6.57952	20	27	9	3UTR		0	0
hsa-miR-221-3p	NM_001297438	VAMP1	AGCTACATTGTCTGCTGGGTTTC#GCCATGAGACGATGTGGG#..(((((((((((.(..(((...#)))..)))))))))))).	1033	1051	1	-19.7	1	1.36546e-06	0.471	1.29459	1.98264	-6.04689	15	18	12	3UTR		0	0
hsa-miR-221-3p	NM_001297558	RPA2	AGCTACATTGTCTGCTGGGTTTC#GAAGCTCAGAGGGAGATGGGCA#.(((.((((.(((.(((((((((#))))))))).))).))))))).	1151	1173	1	-20	0	0.00595031	0.559	3.37333	4.33536	-10.0117	19	22	9	3UTR		0	0
hsa-miR-221-3p	NM_001297595	SIN3B	AGCTACATTGTCTGCTGGGTTTC#CCTGGCAGGCAGATGGCTC#(((((..((((((((((((....#)))))))))))).))))).	3722	3741	1	-22.5	0	1.72703e-09	0.441	0	0	-7.38222	17	19	12	3UTR		0	0
hsa-miR-221-3p	NM_001297603	CDCA3	AGCTACATTGTCTGCTGGGTTTC#AGACTCGGTAGACTGGGCTC#((((.....(((((((((((((.#)))))))))))))..)))).	982	1002	1	-20.9	0	2.00495e-05	0.485	0	0	-14.8713	17	20	13	3UTR		0	0
hsa-miR-221-3p	NM_001297674	RPRD2	AGCTACATTGTCTGCTGGGTTTC#ATGGGGGAGGGTGGGCAATGTAGTG#.(((((((((((((((...((((#.))))...))))))))))))))).	6420	6445	1	-21.7	1	0.0536865	0.603	0	0	-3.79332	19	24	15	3UTR		0	0
hsa-miR-221-3p	NM_001297697	CCDC125	AGCTACATTGTCTGCTGGGTTTC#GAAACCCCATCTATACAAAAACTCGGCAAGGCATGGTGGCA#.(((((..((((((((((((((.#.)))))))))).))))..))))).	3230	3271	1	-27.3	0	4.15196e-05	0.456	0	0	-7.65065	19	24	10	3UTR		0	0
hsa-miR-221-3p	NM_001297717	C1orf43	AGCTACATTGTCTGCTGGGTTTC#GGCCCAGCAGGCCCAGACTGTAT#...((((((((((((((((((..#))))))))))))...)).)))).	919	942	1	-21.7	0	0.000739867	0.426	0	0	-6.51454	18	23	12	3UTR		0	0
hsa-miR-221-3p	NM_001297763	ZNF546	AGCTACATTGTCTGCTGGGTTTC#CCCGGGTTCAGGCAATTCTGCCTCAGCCTCCCCAGTAGCTG#(((((((((((((((((((....#)))))...))))))))..................)))))).	4947	4988	1	-21	1	5.92556e-06	0.368	0	0	-3.93757	19	41	8	3UTR		0	0
hsa-miR-221-3p	NM_001297777	MCTP1	AGCTACATTGTCTGCTGGGTTTC#GACTTGGTAGGGGACTACACTCAGTTGAAATTGCAGCAGACAATGCTTTGCA#.((..((((((((((((((((((#.)))))).))))))))))))....)).	3516	3568	1	-24.6	0	0.00109707	0.647	1.08078	1.61769	-10.9444	20	27	12	3UTR		0	0
hsa-miR-221-3p	NM_001300747	TMEM53	AGCTACATTGTCTGCTGGGTTTC#CCAGAGACAGTGGGGGGCA#.(((.((((((((.((((.....#))))))))))))...))).	1876	1895	1	-20.2	0	0.0128981	0.456	3.88682	3.98472	-8.7692	15	19	12	3UTR		0	0
hsa-miR-221-3p	NM_001300763	CYB561A3	AGCTACATTGTCTGCTGGGTTTC#CCCAGTAGCGATGAGTA#.(((.(((((.((((((((....#)))))))))))))))).	1089	1106	1	-22.1	0	0.0203007	0.471	1.85788	2.06385	-10.7371	16	17	16	3UTR		0	0
hsa-miR-221-3p	NM_001300766	TSEN15	AGCTACATTGTCTGCTGGGTTTC#GAGACCCATCAGACT#.........(((((.((((((((#)))))))).))))).	484	499	1	-19.9	0	0.00347594	0.662	1.69904	2.55239	-21.2157	13	15	8	3UTR		0	0
hsa-miR-221-3p	NM_001300770	LYPLAL1	AGCTACATTGTCTGCTGGGTTTC#ATCACTGTAGACAGTAGCTA#((((((..(((((((.((((...#))).).))))))))))))).	809	829	1	-17.8	0	0.00551018	0.765	3.97611	4.18734	-8.02794	17	20	13	3UTR		0	0
hsa-miR-221-3p	NM_001300795	UBE2D3	AGCTACATTGTCTGCTGGGTTTC#GGGACCCAGCAGTTTTGAAATGTGT#...((((((..((((((((((((#))))))))))))......)))))).	1732	1757	1	-23.6	0	0.0826886	0.662	3.53051	3.6541	-10.5818	18	25	12	3UTR		0	0
hsa-miR-221-3p	NM_001300844	FOSL1	AGCTACATTGTCTGCTGGGTTTC#AGCCCAGAGACTTTGTAGA#..(((((..((((.(((((((..#)))))))))))..))))).	1028	1047	1	-23.6	0	0.000797672	0.441	1.13668	0.656272	-9.18387	16	19	11	3UTR		0	0
hsa-miR-221-3p	NM_001300851	RC3H1	AGCTACATTGTCTGCTGGGTTTC#GAAATCCAGGAAATTCACCAGAGGCAATGTGCA#.((.(((((((((.(((((((((#))))))))).)...........)))))))))).	3569	3602	1	-22	0	0.00643623	0.559	4.14292	4.65516	-7.68219	20	33	10	3UTR		0	0
hsa-miR-221-3p	NM_001300896	CABP4	AGCTACATTGTCTGCTGGGTTTC#GCCCTTCAAGCAGGCGTGTAGTC#.((((((.((((((((((((...#))))....)))))))))))))).	1776	1799	1	-23.6	1	0.000218542	0.471	0	0	-6.10696	18	23	14	3UTR		0	0
hsa-miR-221-3p	NM_001300906	IBTK	AGCTACATTGTCTGCTGGGTTTC#AACTCTGCCCAAAAGCAGCAGACATGTAAGCA#.((((((.((((((((((((...#.)))))......))))))))))).)).	5678	5710	1	-22.6	1	0.000139436	0.603	0	0	-6.10696	18	27	11	3UTR		0	0
hsa-miR-221-3p	NM_001300914	DNAJB1	AGCTACATTGTCTGCTGGGTTTC#CCCGGCAGCCAGTGC#.....(((((.((((((((....#)))))))).))))).	2118	2133	1	-21	0	8.71362e-05	0.485	0	0	-16.4904	13	15	8	3UTR		0	0
hsa-miR-221-3p	NM_001300919	HMGA2	AGCTACATTGTCTGCTGGGTTTC#GAACTCCAGTTACTCTCGTACAGGGATCCACCTTTTTGCAGAAATCACAGTGTGGCTA#(((((((((((((((((((((((#.)))))))).......))))).....)))))))))).	1770	1828	1	-25.3	1	0.0066657	0.588	-0.160215	-0.102215	-3.93757	23	37	10	3UTR		0	0
hsa-miR-221-3p	NM_001300948	LONP2	AGCTACATTGTCTGCTGGGTTTC#GAACCCAGGAGGTGGAGGTTGCAGTGAGCTG#((((.((((((((.((((((((.#)))))))).)).........)))))))))).	3266	3297	1	-24	0	0.00012866	0.397	0.269569	0.609411	-8.91345	20	31	10	3UTR		0	0
hsa-miR-221-3p	NM_001300951	ZNF91	AGCTACATTGTCTGCTGGGTTTC#AAACTACCAGTGTGAACAATGTGGCC#.(((((((((((((((((((((.#))))..)))))).)).))))))))).	4292	4318	1	-21.4	1	0.00027861	0.603	0	0	-3.79332	21	26	9	3UTR		0	1
hsa-miR-221-3p	NM_001300993	ZNF570	AGCTACATTGTCTGCTGGGTTTC#GAACCCAGGAGGCAGAGGTTGCA#.((.((.((((((.((((((((.#)))))))).))))))..)).)).	2625	2648	1	-24.9	0	2.39986e-05	0.412	4.15752	4.35179	-9.22587	18	23	8	3UTR		0	0
hsa-miR-221-3p	NM_001301068	ARL1	AGCTACATTGTCTGCTGGGTTTC#AGACCCGGCATGTAGCC#.((((((.....((((((((((.#)))))))))))))))).	2486	2503	1	-22.3	1	0.00019309	0.412	-0.161249	1.36472	-14.5774	16	17	16	3UTR		0	0
hsa-miR-221-3p	NM_001301089	SNX19	AGCTACATTGTCTGCTGGGTTTC#AACCCATGAGAGTAAAGATGTAGCTA#(((((((((.(((..((((((..#))))))..))).....))))))))).	8197	8223	1	-20.8	1	0.0961307	0.618	0	0	-6.77237	18	26	9	3UTR		0	0
hsa-miR-221-3p	NM_001301128	MAGI2	AGCTACATTGTCTGCTGGGTTTC#GAGAGACAGTGCAGTGTAGCTT#(((((((((((..((((..((((#))))..))))))))))))))).	4941	4963	1	-22.8	1	0.00368762	0.618	2.11203	1.87627	-8.57351	19	22	15	3UTR		0	0
hsa-miR-221-3p	NM_001301135	MTERF1	AGCTACATTGTCTGCTGGGTTTC#AGCCCAGTGAGATCAATGTC#....(((((((((((((((((..#)))))))).))).)))))).	1749	1769	1	-20.4	0	0.0221808	0.529	0.423106	0.0553881	-9.54656	17	20	8	3UTR		1	0
hsa-miR-221-3p	NM_001301161	CDHR3	AGCTACATTGTCTGCTGGGTTTC#GAAACTCAGCCTGTGTAGCA#.(((((((.....((((((((((#))))))))))..))))))).	5979	5999	1	-23.5	1	1.39088e-06	0.471	0	0	-13.5529	17	20	10	3UTR		0	0
hsa-miR-221-3p	NM_001301202	RASAL1	AGCTACATTGTCTGCTGGGTTTC#GGAGCCTGGGAGACCTTGGGCC#.(((.((..((((.(((((((((#))))))))).))))..))))).	3285	3307	1	-22.4	0	3.47358e-07	0.426	0	0	-12.1392	18	22	9	3UTR		0	0
hsa-miR-221-3p	NM_001301203	TMED3	AGCTACATTGTCTGCTGGGTTTC#TAGCAGATAATTGGGTAGCC#.((((((((((((((((......#)))))))))))...))))).	2247	2267	1	-20	1	0.00914375	0.691	2.54453	3.30753	-3.79332	16	20	11	3UTR		0	0
hsa-miR-221-3p	NM_001301206	BNC1	AGCTACATTGTCTGCTGGGTTTC#GCCGTAGATAATGTGGTTC#(((((((((((((((..(((...#)))))))))))))))))).	4127	4146	1	-21	1	0.00469554	0.632	0	0	-4.17062	18	19	18	3UTR		0	0
hsa-miR-221-3p	NM_001301248	ERC1	AGCTACATTGTCTGCTGGGTTTC#GACACCACATGGCATTTCTCAAGCCCAGCGGACCCTGTGTCAGCA#.(((((((.(((((((((((((.#.)))))))))))))...)))).))).	7446	7491	1	-29.5	1	0.00259782	0.515	-0.161363	-0.0678552	-4.84971	20	26	13	3UTR	MIRT046960	0	0
hsa-miR-221-3p	NM_001301645	LRAT	AGCTACATTGTCTGCTGGGTTTC#GAAATCTGTATGCAGGAGGCAATGCTAGCA#.((((((((((((.(((.((...#.)).))).)))))))).)))).	2812	2842	1	-23.3	1	0.000597475	0.574	0.787003	0.433006	-4.65016	17	22	8	3UTR		0	0
hsa-miR-221-3p	NM_001301871	MTRF1L	AGCTACATTGTCTGCTGGGTTTC#GACCCAGTAGCTAGGCACCTGTGGCC#.((((((.(((((((((((((..#))))))))))....)))..)))))).	2525	2551	1	-24	1	3.65678e-05	0.574	0	0	-6.10696	19	26	10	3UTR		0	0
hsa-miR-221-3p	NM_001302378	RBSN	AGCTACATTGTCTGCTGGGTTTC#GAACCCGGGAGGCAGAGCTT#((((...((((((.((((((((.#)))))))).)))))))))).	3782	3802	1	-23.2	0	0.000509721	0.397	0	0	-12.3581	18	20	10	3UTR		0	0
hsa-miR-221-3p	NM_001302643	SLC17A9	AGCTACATTGTCTGCTGGGTTTC#CCAGCGGGCTCGGCCCTGTCCTCCTCACAGGCTGGTGTGGCC#.(((((((((((((((((.....#)))))))))........................)))))))).	1726	1768	1	-23	1	5.01255e-06	0.353	0	0	-3.79332	17	42	9	3UTR		0	0
hsa-miR-221-3p	NM_001302695	DEFB134	AGCTACATTGTCTGCTGGGTTTC#GACTACTGGTTTTTAGCATTTTTATAGGCCAGCAGACTCTTGTGGTC#.((((((..(((((((((.((..#.)).)))))))))...)))))).	397	444	1	-25	1	0.000153262	0.618	0.430282	0.408171	-7.16335	17	23	9	3UTR		0	0
hsa-miR-221-3p	NM_001303037	PALS2	AGCTACATTGTCTGCTGGGTTTC#GAAACCCAGTATGCCTACAGCATTAGTAGCC#.((((((.(((((((((((((((#))))))))))).)......))).).))))).	4974	5005	1	-21.7	1	0.00820076	0.662	0	0	-6.10696	21	31	11	3UTR		0	0
hsa-miR-221-3p	NM_001303249	SLC25A46	AGCTACATTGTCTGCTGGGTTTC#AAACCCAGTGTTTCAGTGCTAGCA#.(((((((((...(((((((((.#)))))))))....))))).)))).	1888	1912	1	-22.9	1	0.0180525	0.647	0	0	-11.254	18	24	9	3UTR		0	1
hsa-miR-221-3p	NM_001303420	COLGALT2	AGCTACATTGTCTGCTGGGTTTC#GCCTAGTGGAAATGTAGG#..(((((((.((((((((((...#))))))))))))))))).	2532	2550	1	-21.4	1	0.000258851	0.618	0	0	-6.19951	17	18	17	3UTR		0	0
hsa-miR-221-3p	NM_001303429	PIK3R3	AGCTACATTGTCTGCTGGGTTTC#AGACCCAGGGGCCCTGTGGTC#.((((((..((((.((((((((.#))))))))))))..)))))).	3070	3091	1	-22.4	1	2.42489e-07	0.441	0.921721	1.40649	-8.02019	18	21	12	3UTR		0	0
hsa-miR-221-3p	NM_001303542	RAB11FIP4	AGCTACATTGTCTGCTGGGTTTC#GCCCAGCAGATCCACAGCG#.(((.....(((((((((((...#)))))))))))....))).	6430	6449	1	-22.7	0	0.00802765	0.515	0	0	-14.727	14	19	11	3UTR		0	0
hsa-miR-221-3p	NM_001304346	ERMN	AGCTACATTGTCTGCTGGGTTTC#GGAATCTGGCATAATTCGGCTATAAATGTAGCA#.((((((((((((((((((((((#)))))))))))......)))....)))))))).	1254	1287	1	-21.5	1	0.000739803	0.574	3.69415	3.56971	-3.79332	22	33	11	3UTR		0	1
hsa-miR-221-3p	NM_001304367	CNBD2	AGCTACATTGTCTGCTGGGTTTC#AAACTGGTTTCTGAGGGGCCAGCAGGTAATATAACTAGTGTGTATGTAGCTG#((((((((((((((((((.(((.#.))).))))))))))...............)))))))).	1663	1715	1	-22.9	1	7.84228e-05	0.529	1.08378	0.749781	-3.93757	21	39	10	3UTR		0	0
hsa-miR-221-3p	NM_001304376	ADGRG5	AGCTACATTGTCTGCTGGGTTTC#GCCCAGGTAGGCGTGAGAGTGTGGG#..((((((((((((((((((...#)))))).)))))).....)))))).	2573	2598	1	-21.2	1	0.0066389	0.544	0	0	-4.957	18	25	6	3UTR		0	0
hsa-miR-221-3p	NM_001304495	TRIM35	AGCTACATTGTCTGCTGGGTTTC#GATAAAACTTAAGGCCACAAGGAGGGCCCAGGTAGGCGATGTCAGTG#.(((((((((((((((((((((.#.)))))))).)))))))))).))).	2960	3007	1	-26.4	1	0.00148214	0.397	0	0	-3.79332	21	25	10	3UTR		0	0
hsa-miR-221-3p	NM_001304529	CCDC25	AGCTACATTGTCTGCTGGGTTTC#AAACTGAGCAGGGTGGCA#.(((((....((((((.(((((.#))))).))))))))))).	2826	2844	1	-19.6	0	0.00488261	0.603	0	0	-9.94954	16	18	11	3UTR		0	0
hsa-miR-221-3p	NM_001304564	MIEF1	AGCTACATTGTCTGCTGGGTTTC#AAACCCGGGAGGCGGAGGTTACAGTGAGCTG#((((.((((((((.((((((((.#)))))))).))))).........))))))).	3182	3213	1	-22.6	0	0.000352341	0.441	0	0	-8.91345	20	31	8	3UTR		0	0
hsa-miR-221-3p	NM_001304748	TMEM74B	AGCTACATTGTCTGCTGGGTTTC#GGGGCCCAGCCCATGCCCCACACGGGCAAGCAGCCCACTGATCTGTTTTGTAGCTG#(((((((((((((((((((((((#)))))))))).............))))))...................))))))).	1751	1807	1	-25.3	1	0.00584999	0.5	0	0	-3.93757	23	56	10	3UTR		0	0
hsa-miR-221-3p	NM_001304808	BRD1	AGCTACATTGTCTGCTGGGTTTC#CCCAGCGGATTATTTATTGTAGA#..(((((..((((((((((....#)))))))))).......))))).	4511	4534	1	-21.4	0	0.0306169	0.603	0	0	-8.32703	15	23	10	3UTR	MIRT024192	0	1
hsa-miR-221-3p	NM_001304947	KRBA2	AGCTACATTGTCTGCTGGGTTTC#GAGACCTGGCAGACAC#........(((((((((((((((#))))))))))))))).	11894	11910	1	-24.1	0	0.000480548	0.515	0	0	-19.4239	15	16	15	3UTR		0	0
hsa-miR-221-3p	NM_001304990	SPRY3	AGCTACATTGTCTGCTGGGTTTC#CCCAGTGGACATCACCTTTGGCTC#(((((...(((((((((((....#))))))))))).......))))).	2692	2716	1	-20.8	0	0.000218781	0.456	0	0	-9.69585	16	24	11	3UTR		0	0
hsa-miR-221-3p	NM_001305009	LNPK	AGCTACATTGTCTGCTGGGTTTC#GAAATCCAAAGGCATGATGCTAGCA#.((((((((((((..((((((((#)))))))).)))))..))).)))).	5132	5157	1	-20.1	1	0.000783823	0.5	0.253383	0.47496	-5.38561	20	25	8	3UTR		0	0
hsa-miR-221-3p	NM_001305033	ZNF33B	AGCTACATTGTCTGCTGGGTTTC#GAGACCCACAGAGCTAATGTT#....((((((((((.((((((((#))))))))))))..)))))).	3542	3563	1	-19.6	0	0.023476	0.735	0	0	-10.282	18	21	12	3UTR		0	0
hsa-miR-221-3p	NM_001305077	NAT9	AGCTACATTGTCTGCTGGGTTTC#TCCAGCTAGTGGTGTGGCTG#((((((((((.((((((((....#)))))).)))))))))))).	865	885	1	-22.2	1	2.84911e-06	0.324	0	0	-6.76235	18	20	12	3UTR		0	0
hsa-miR-221-3p	NM_001305203	ZFP90	AGCTACATTGTCTGCTGGGTTTC#GAAACTCAGCACATCTTCATTGACAGGGAGGGAGCCCAGGACATATGTGTGGCTC#((((((((((((..(((((((((#.)))))))))))))...)))))))).	4380	4435	1	-26.2	1	2.5186e-05	0.485	0	0	-6.08354	21	26	13	3UTR		0	1
hsa-miR-221-3p	NM_001305225	GVQW3	AGCTACATTGTCTGCTGGGTTTC#GCTGGGCATTGACAATGTGGA#..((((((((((((((.(((...#))).))))..)))))))))).	1992	2013	1	-22.5	1	0.00144721	0.544	0	0	-4.957	17	21	10	3UTR		0	0
hsa-miR-221-3p	NM_001305456	MED20	AGCTACATTGTCTGCTGGGTTTC#CCCTCAGAGGATGTGGCTG#(((((((((.((((..(((....#))).)))).))))))))).	1318	1337	1	-24.4	1	0.00118093	0.5	0	0	-6.14858	16	19	9	3UTR		0	0
hsa-miR-221-3p	NM_001306089	ZNF236	AGCTACATTGTCTGCTGGGTTTC#CCTAGCAGAGACATGTTCTTTGTCATGGTGTGGCTT#(((((((((.(((((((((....#))))))))).)................)))))))).	9553	9589	1	-23.2	1	3.63416e-06	0.5	0	0	-5.18008	18	36	9	3UTR	MIRT719772	0	0
hsa-miR-221-3p	NM_001306093	ZADH2	AGCTACATTGTCTGCTGGGTTTC#GAAAGTGCAGTGACAAGTAGCTG#((((((.(((((.((((.(((((#)))).).))))))))))))))).	4292	4315	1	-20.6	0	0.000140495	0.676	0.340512	1.42414	-6.77039	20	23	15	3UTR		1	0
hsa-miR-221-3p	NM_001306144	MTMR1	AGCTACATTGTCTGCTGGGTTTC#AGGCCCAGGGACCATTTGTGTGGCTA#((((((((.((((.((((((((.#)))))))))))).....)))))))).	2259	2285	1	-23.7	1	0.000255168	0.471	0	0	-5.8508	20	26	12	3UTR		0	0
hsa-miR-221-3p	NM_001306158	RABL2A	AGCTACATTGTCTGCTGGGTTTC#ACCCCCTCCCCCCAGGCAGACAGTGAAGA#..((.((((((((((((((....#.))))).))))))))).)).	1134	1163	1	-24.5	0	0.00053182	0.485	0	0	-9.07604	16	20	9	3UTR		0	0
hsa-miR-221-3p	NM_001306215	ZNF827	AGCTACATTGTCTGCTGGGTTTC#CCCAGCAGGTGTATGTTGCTG#(((.((((..(((((((((....#)))))))))...)))).))).	4577	4598	1	-22.6	0	3.60119e-05	0.515	0	0	-9.26849	16	21	9	3UTR		0	0
hsa-miR-221-3p	NM_001306219	TCF12	AGCTACATTGTCTGCTGGGTTTC#AAACCCAGTAGTCACCAAGGCAGGTAGTG#.(((((.(((((((((((((((.#)))))))))))........))))))))).	2793	2822	1	-22.3	0	0.00038881	0.559	0	0	-5.33701	20	29	11	3UTR		1	1
hsa-miR-221-3p	NM_001307928	SERPINB12	AGCTACATTGTCTGCTGGGTTTC#CCAGTCGTTCAGTGTGGCC#.(((((((((.(.(((((.....#))))).)..))))))))).	3113	3132	1	-20.4	1	0.000545153	0.441	0	0	-7.90723	15	19	9	3UTR		0	0
hsa-miR-221-3p	NM_001307930	RASL12	AGCTACATTGTCTGCTGGGTTTC#GAAAAGGCTGTCCAAGGCAGGCAGTGTGGTA#.((((((((((((((((((....#.))))..)))))))))))))).	1994	2025	1	-25.7	1	4.32158e-06	0.515	0.050378	0.305126	-3.79332	18	22	14	3UTR		0	0
hsa-miR-221-3p	NM_001307960	TM2D3	AGCTACATTGTCTGCTGGGTTTC#GAATCCAGCTAAGCGATGC#.....((((((..(((((((((.#)))))))))...)))))).	894	913	1	-18	0	0.0185796	0.559	5.22904	4.80332	-18.3015	15	19	9	3UTR		0	0
hsa-miR-221-3p	NM_001307975	TMPO	AGCTACATTGTCTGCTGGGTTTC#GAACCCAGGAGGCAGAGGTTGCA#.((.((.((((((.((((((((.#)))))))).))))))..)).)).	2704	2727	1	-24.9	0	0.000152701	0.471	0	0	-9.22587	18	23	8	3UTR		0	0
hsa-miR-221-3p	NM_001308006	LIPG	AGCTACATTGTCTGCTGGGTTTC#GAGACCAGCCTGGCCAATGTGGTG#.(((((((((((.(((.((((((#)))))))))..))).)))))))).	7442	7466	1	-22.2	1	0.000100472	0.559	0	0	-5.08246	20	24	9	3UTR		0	0
hsa-miR-221-3p	NM_001308013	LOXHD1	AGCTACATTGTCTGCTGGGTTTC#AAACCCAGTGGCAAGTGGA#..((((.(((((.(((((((((.#)))))))))))))))))).	3614	3633	1	-22.3	0	0.000108395	0.58	0	0	-7.78982	18	19	18	3UTR		0	0
hsa-miR-221-3p	NM_001308020	PIK3C3	AGCTACATTGTCTGCTGGGTTTC#AAGCCTCAGAAGATAGTGAGCA#.(((.((((((((.((((((((.#))))).))).))))))))))).	6015	6037	1	-21.9	0	0.0173818	0.559	-0.143486	0.181971	-8.7692	19	22	11	3UTR		0	0
hsa-miR-221-3p	NM_001308044	RBM23	AGCTACATTGTCTGCTGGGTTTC#GGGCCCGGCACACTGATTGGCA#.((((....((.((((((((((.#)))))))))).))....)))).	9683	9705	1	-20.5	0	0.00223252	0.574	0	0	-13.9548	16	22	10	3UTR		0	0
hsa-miR-221-3p	NM_001308047	PRUNE2	AGCTACATTGTCTGCTGGGTTTC#AAATCCAGTGTTCAGTGTAGTG#.(((((((((..((((((((((.#))))))))))..))))))))).	11499	11521	1	-22.8	1	0.000995751	0.559	0	0	-9.9649	19	22	10	3UTR		0	0
hsa-miR-221-3p	NM_001308094	GATA4	AGCTACATTGTCTGCTGGGTTTC#GAGACTCCTTCCTCTTTCTCAGCAGAGCTGTAGCTG#(((((((...(((((((((....#.)))))))))..))))))).	2370	2406	1	-24.5	1	0.000100594	0.456	0.0801888	0.0638708	-8.55011	16	20	9	3UTR		1	0
hsa-miR-221-3p	NM_001308097	G2E3	AGCTACATTGTCTGCTGGGTTTC#GAGGCTGAGGTGGGAGAATCGAGATACTCAGCCAGCCTGGCAATGTAGCA#.(((((((((((.(((((.(...#.).)))))..))))))))))).	2857	2907	1	-27.5	1	0.00408045	0.574	0	0	-5.08246	17	22	11	3UTR		0	0
hsa-miR-221-3p	NM_001308116	PHC3	AGCTACATTGTCTGCTGGGTTTC#GAGCCACCACACCTGTCCGACAGTGTAGCA#.(((((((((((.(.(((((...#.))))).).))))))))))).	10598	10628	1	-22.9	1	0.00173455	0.559	0	0	-5.81791	17	21	11	3UTR		0	0
hsa-miR-221-3p	NM_001308158	TGFA	AGCTACATTGTCTGCTGGGTTTC#GGCCAGGTGGACTGTGGCA#.((((((..(((((((.((((..#)))).))))))))))))).	726	745	1	-20.6	1	0.000452919	0.485	4.74305	2.9062	-7.16335	17	19	13	3UTR		0	0
hsa-miR-221-3p	NM_001308201	SS18	AGCTACATTGTCTGCTGGGTTTC#AAACCTTGTGGATAAGTGGCTG#((((((.((((((((.((((((.#)))))).)))))))))))))).	1422	1444	1	-23.1	0	0.00052485	0.603	0.0630403	0.942045	-5.71431	20	22	14	3UTR		0	0
hsa-miR-221-3p	NM_001308203	SGIP1	AGCTACATTGTCTGCTGGGTTTC#AGGCCAAGCAGTAATGTATACAGCTG#((((((((((.(((((.(((((.#))))).)))))))))))....)))).	9178	9204	1	-20.1	1	0.000731019	0.588	0	0	-6.76235	20	26	11	3UTR		0	1
hsa-miR-221-3p	NM_001308225	ZNF521	AGCTACATTGTCTGCTGGGTTTC#AGGCCCGTATATATATATTTGTAAGCCTTGCAATGTGACAGGTAGCA#.(((((.((((((((.((((((.#.)))))).)))....)))))))))).	4569	4616	1	-21.7	0	0.0107772	0.691	0	0	-5.57006	19	26	10	3UTR		0	0
hsa-miR-221-3p	NM_001308231	CABYR	AGCTACATTGTCTGCTGGGTTTC#AAGCCCTGTTTTCCTTTCTGTTGCTTTCCCAGTAGAAGATGTAGCTA#(((((((((.(((((((((....#.))))))))).))))))))).	1795	1842	1	-29.3	1	0.000107396	0.632	1.43359	2.52834	-5.18008	18	21	9	3UTR	MIRT046975	0	0
hsa-miR-221-3p	NM_001308242	IL2RA	AGCTACATTGTCTGCTGGGTTTC#AAACCCATGAGGCAATGTCAGG#..(((((((((((..(((((((.#)))))))..))))))))).)).	1504	1526	1	-22.7	1	0.0102108	0.471	-0.0465953	0.113073	-6.54929	18	22	9	3UTR		0	0
hsa-miR-221-3p	NM_001308263	RNMT	AGCTACATTGTCTGCTGGGTTTC#GGAGCTGAGAATGCCAGTACGAGAGTGTAGCC#.((((((((.((((((((..(((#.)))..)))))).)).)))))))).	3693	3725	1	-25.2	1	0.0243204	0.471	-0.0586097	0.00468702	-5.03583	19	25	8	3UTR		0	0
hsa-miR-221-3p	NM_001308301	MYLK3	AGCTACATTGTCTGCTGGGTTTC#GGAACTCAGTAGACTACTTTGCA#.((......((((((((((((((#))))))))))))))......)).	2086	2109	1	-23.2	0	0.00251921	0.574	-0.0333476	0.105016	-17.7591	16	23	14	3UTR		0	0
hsa-miR-221-3p	NM_001308339	DENND5B	AGCTACATTGTCTGCTGGGTTTC#GAAACCCAGAATGCATTGTTATGTAGTA#.((((((((((...(((((((((#)))))))))...))).....))))))).	4500	4528	1	-22.6	1	0.00997813	0.588	2.69408	2.83845	-9.2861	19	28	9	3UTR		0	0
hsa-miR-221-3p	NM_001308370	ESPNL	AGCTACATTGTCTGCTGGGTTTC#GGCCCAGCAGGGAGTGGCA#.(((((..(.(((((((((((..#))))))))))).)))))).	3174	3193	1	-26	0	9.09341e-05	0.368	0	0	-8.89315	17	19	11	3UTR		0	0
hsa-miR-221-3p	NM_001308392	CDH11	AGCTACATTGTCTGCTGGGTTTC#GGGGCAAAATTTATTTGGCAGGCAGTGTGGA#..((((((((((((((((((...#.)))))))))))))))))).	6163	6194	1	-24.5	1	0.00174143	0.529	0	0	-4.957	18	20	18	3UTR		0	0
hsa-miR-221-3p	NM_001308445	NAA50	AGCTACATTGTCTGCTGGGTTTC#GGGCACCAGTTGCCTGGTGGACAACTGGTATGTGGCTT#((((((((((((((((((((...#.))))))))))))......)))))))).	4406	4444	1	-24.8	1	0.000644339	0.485	0	0	-3.93757	20	28	12	3UTR		0	0
hsa-miR-221-3p	NM_001308471	CYSLTR2	AGCTACATTGTCTGCTGGGTTTC#GAGATTTCTCCAGTGGATCCACAATGTATATGCTA#(((((((((((((((((((....#.)))))))))....)))))))...))).	3601	3636	1	-19.5	1	0.171371	0.544	0.879106	0.624119	-3.93757	19	28	9	3UTR		0	0
hsa-miR-221-3p	NM_001309842	GNAS	AGCTACATTGTCTGCTGGGTTTC#TTGGCAGAAATGTAGTA#.((((((((.((((((((.....#)))))))))))))))).	765	782	1	-18.3	1	0.00413326	0.691	5.97273	5.95765	-5.03583	16	17	16	3UTR		0	0
hsa-miR-221-3p	NM_001310319	MFGE8	AGCTACATTGTCTGCTGGGTTTC#GAAGCCCAGCGACACAGAAGGGGGTGGGGCG#.(((.((((.(((((((((((((#))))))))))........))).)))).))).	1637	1668	1	-25.3	0	0.00704925	0.368	5.06679	5.41508	-9.15487	20	31	10	3UTR		0	0
hsa-miR-221-3p	NM_001311162	THY1	AGCTACATTGTCTGCTGGGTTTC#GAGGGTGGGTAGGACCAATGTGGCA#.(((((((((((((((.(.((((#)))).).))))))..))))))))).	4350	4375	1	-23.1	1	0.00136716	0.456	1.76493	2.29375	-3.79332	20	25	9	3UTR		0	0
hsa-miR-221-3p	NM_001311255	BLOC1S6	AGCTACATTGTCTGCTGGGTTTC#GGGCTTGCAGACAATGTC#....(((((((((((.((((((.#))))))))))))))))).	2527	2545	1	-19.8	0	0.0156738	0.588	0.567241	0.168591	-9.77961	17	18	17	3UTR		0	0
hsa-miR-221-3p	NM_001313692	SMIM11B	AGCTACATTGTCTGCTGGGTTTC#GAAATCCCAGCACTTTGGGAGGCCGAGGCGAGTGGA#..((((.((((((((((((((((#)))).)))))))..............))))))))).	525	561	1	-20.6	0	3.88265e-05	0.397	-0.0783722	0.159255	-6.50069	20	36	9	3UTR		0	0
hsa-miR-221-3p	NM_001313941	RHOA	AGCTACATTGTCTGCTGGGTTTC#ACCCCAGACTAGATGTAGTA#.(((((((((((((..((((...#)))))))))..)))))))).	1425	1445	1	-20.1	1	0.00108959	0.735	0	0	-4.76182	17	20	9	3UTR	MIRT046885	0	0
hsa-miR-221-3p	NM_001314049	SIRT1	AGCTACATTGTCTGCTGGGTTTC#TCCTGTGGACATGTAGTA#.((((((.(((((((.(((....#))).))))))))))))).	2273	2291	1	-19.4	1	1.24425e-05	0.647	1.84103	0.899533	-6.34001	16	18	13	3UTR	MIRT054771	0	0
hsa-miR-221-3p	NM_001315	MAPK14	AGCTACATTGTCTGCTGGGTTTC#GAGTGTAAGAGTGGCCGAAATGACAGGGCTCAGCAGACTGTGGCC#.((((((..(((((((((((((.#.))))))))))))))))))).	4005	4050	1	-28.1	1	0.000116105	0.412	0	0	-7.16335	19	21	19	3UTR		0	0
hsa-miR-221-3p	NM_001316321	CCDC57	AGCTACATTGTCTGCTGGGTTTC#GGACCCTGCACAGGAGAGACAGTGTAGA#..(((((((((((((.((((((.#)))))).))).......)))))))))).	5752	5780	1	-23.8	1	0.000612963	0.397	0	0	-5.19005	19	28	10	3UTR		0	0
hsa-miR-221-3p	NM_001316362	PRKRA	AGCTACATTGTCTGCTGGGTTTC#AAACTTTGTACCACAAGAGAGAGTGTAGCA#.((((((((.(((..(((((...#.))).))..))).)))))))).	1404	1434	1	-21.7	1	0.00147337	0.603	0	0	-6.62812	16	22	8	3UTR		0	0
hsa-miR-221-3p	NM_001316897	SPACA9	AGCTACATTGTCTGCTGGGTTTC#GCCCAAACAGGATGGTGTGGTA#.((((((((((((..(((((...#)))))....)))))))))))).	1361	1383	1	-21	1	0.0147845	0.456	-0.396915	-0.347922	-5.38561	17	22	12	3UTR		0	0
hsa-miR-221-3p	NM_001317094	NAA60	AGCTACATTGTCTGCTGGGTTTC#CCCAGGGCTGACCCAGTGTGGCTG#((((((((((((..(((((....#)))))....)))..))))))))).	1235	1259	1	-22.1	1	0.0004552	0.324	-0.0287567	-0.0718691	-6.08354	17	24	9	3UTR		0	0
hsa-miR-221-3p	NM_001317107	OR4E1	AGCTACATTGTCTGCTGGGTTTC#AAACCAACATCTTAAATCTCACTGTGGCGGCACATAGTGTAGCA#.((((((((((.(((((......#.))))).)))))))))).	3024	3068	1	-21.4	1	1.59784e-05	0.574	0	0	-7.14013	15	18	10	3UTR		0	0
hsa-miR-221-3p	NM_001317225	SPACA3	AGCTACATTGTCTGCTGGGTTTC#GCACAGCAGGCTGGGAAATGTGGTTT#(((((((((((((((((.((...#)).)))))))).....))))))))).	806	832	1	-20.9	1	0.00206743	0.456	0	0	-3.93757	19	26	9	3UTR		0	0
hsa-miR-221-3p	NM_001317237	CTSB	AGCTACATTGTCTGCTGGGTTTC#CCCAGCTGACTGTGGCC#.((((((..(((.((((((....#)))))).))))))))).	1363	1380	1	-23.4	1	0.000364852	0.353	0	0	-8.45248	15	17	9	3UTR		0	0
hsa-miR-221-3p	NM_001317384	AQP4	AGCTACATTGTCTGCTGGGTTTC#GAAAATTAGTAGGAAGATGTGGTTA#(((((((((.((((((((.((((#)))).))))))))..))))))))).	4477	4502	1	-19.4	1	0.00272478	0.721	0	0	-5.18008	21	25	9	3UTR		0	0
hsa-miR-221-3p	NM_001317911	PPM1L	AGCTACATTGTCTGCTGGGTTTC#GGGACCTGGCAGTTGCAACACAGTA#.(((...((((((((((((((((#))))))))))))..))))...))).	2107	2132	1	-20.1	0	0.00292955	0.485	0	0	-11.357	19	25	12	3UTR		0	0
hsa-miR-221-3p	NM_001317939	BNC2	AGCTACATTGTCTGCTGGGTTTC#GAGCTCCCAGACAATGTGCTG#(((.((((((((((..((((((.#)))))).))))))))))))).	11308	11329	1	-22.4	0	0.00369129	0.588	0	0	-7.9381	19	21	13	3UTR		0	0
hsa-miR-221-3p	NM_001317941	ENTPD6	AGCTACATTGTCTGCTGGGTTTC#GGACCAGGACAGAACCACAGGCACACACTGAGGGGGCAGTGTGGCTC#(((((((((((((.((.(((...#.))).)).))))))))))))).	1872	1919	1	-27.2	1	2.07311e-09	0.338	0	0	-4.79441	18	22	13	3UTR		0	0
hsa-miR-221-3p	NM_001317942	RSPO2	AGCTACATTGTCTGCTGGGTTTC#GCCTATTTATGTGAAAGAAGATGCTTGGCAGGCAATGCGCTA#(((..(((((((((((((((.((#.)).))))))))))))))).))).	1043	1085	1	-25	0	0.000272523	0.588	0.618121	1.39429	-11.0886	20	24	15	3UTR		0	0
hsa-miR-221-3p	NM_001317944	BSPRY	AGCTACATTGTCTGCTGGGTTTC#GACTGGGTGGATGTTGTGGTC#.((((((.((((((((.((((..#)))).)))))))).)))))).	1685	1706	1	-20.6	1	0.00834707	0.456	0	0	-6.10696	18	21	8	3UTR		0	0
hsa-miR-221-3p	NM_001317990	ZBTB7A	AGCTACATTGTCTGCTGGGTTTC#AGGCTCGAGCGGGCGATACCAAAGTCTGCCCCCCCACCATTGTGGCC#.(((((((((((((((((((((.#)))))).)))))))))........................)))))).	5340	5387	1	-21.7	1	0.00155357	0.426	0	0	-3.79332	21	47	9	3UTR		0	0
hsa-miR-221-3p	NM_001317997	C9orf64	AGCTACATTGTCTGCTGGGTTTC#CCCTGTGGACATGTAGTTG#(((((((.(((((((.(((....#))).)))))))))))))).	1709	1728	1	-22	1	0.00125918	0.662	0.767176	0.683073	-6.48426	17	19	14	3UTR		0	0
hsa-miR-221-3p	NM_001318006	TLCD3A	AGCTACATTGTCTGCTGGGTTTC#GGGAACCTGAGTAGGTAGTGTGGCC#.((((((((((((((((((((((#.))))))).))))))))))))))).	1364	1389	1	-27.1	1	0.000349433	0.456	1.0277	-0.03952	-3.79332	22	25	15	3UTR		0	0
hsa-miR-221-3p	NM_001318013	XRCC4	AGCTACATTGTCTGCTGGGTTTC#GAAAAGCCAAGGAAACTGATCTTCCCTTCGAGCCTCCGGAGGGAGTGTAGCC#.((((((((.(((.(.((((((.#.))))))..).))).)))))))).	1108	1160	1	-22.6	1	5.11313e-07	0.485	0	0	-6.12572	18	24	8	3UTR		0	0
hsa-miR-221-3p	NM_001318067	MAPK10	AGCTACATTGTCTGCTGGGTTTC#GAAACCCAGCGTTCTTCAGGAGATGATGTGA#...((((((((((((((((((((#))))))))))..........)))))))))).	1532	1563	1	-24.9	0	0.00258153	0.471	0.716498	0.414131	-6.51454	20	31	10	3UTR	MIRT053727	1	1
hsa-miR-221-3p	NM_001318198	SNX10	AGCTACATTGTCTGCTGGGTTTC#AAACCCTATGAAGAGTAACAGTGTAGA#..(((((((((.((((((((((.#)))))).......))))))))))))).	1351	1378	1	-19	1	0.00123	0.574	0.282938	0.20212	-8.3038	19	27	13	3UTR		0	0
hsa-miR-221-3p	NM_001318360	ELP1	AGCTACATTGTCTGCTGGGTTTC#GAACTTCAGCAGACAACAAGCA#.(((...(((((((((((((((.#))))).))))))))))..))).	4306	4328	1	-22.1	0	0.0118093	0.676	0	0	-11.357	18	22	10	3UTR		0	0
hsa-miR-221-3p	NM_001318362	EXOSC1	AGCTACATTGTCTGCTGGGTTTC#GGACACGTGGTGATACAGATAGCATGTGAGGCAGGCATGGTGGCTC#((((((..((((((((.......#.))))))))..)))))).	997	1043	1	-22.1	0	0.000426336	0.515	-0.60098	-0.109928	-7.7949	14	18	8	3UTR		0	0
hsa-miR-221-3p	NM_001318374	PCDH9	AGCTACATTGTCTGCTGGGTTTC#CCCTAATAGAAGAGCAGATGTTGTAGCC#.((((((.(((((((((((....#))).........)))))))).)))))).	20079	20107	1	-21.9	1	0.0112588	0.647	0	0	-6.10696	17	28	8	3UTR		0	0
hsa-miR-221-3p	NM_001318489	TRAPPC4	AGCTACATTGTCTGCTGGGTTTC#GAAATCCCAGCAGCCTTGTTAGTG#.((((((..(.((((((((((((#)))).)))))))))..))).))).	599	623	1	-21.9	1	0.00041872	0.485	0.0294565	1.70036	-9.98812	19	24	9	3UTR		0	0
hsa-miR-221-3p	NM_001318835	DHRS2	AGCTACATTGTCTGCTGGGTTTC#AGACCCACCAGACAGAGCTT#((((...(((((((.(((((((.#))))))).))))))))))).	949	969	1	-21.6	0	0.0166292	0.441	0	0	-12.2367	18	20	11	3UTR		0	0
hsa-miR-221-3p	NM_001318896	FHL2	AGCTACATTGTCTGCTGGGTTTC#GAACCCGGGAGGCAGAGCTTGCAGTGAGCTG#((((.((((((((.((((((((.#)))))))).))))).........))))))).	1773	1804	1	-23.7	0	4.56673e-05	0.426	0	0	-8.91345	20	31	8	3UTR		0	0
hsa-miR-221-3p	NM_001318936	RPS6KA2	AGCTACATTGTCTGCTGGGTTTC#GAGACACAGGCCCCACCCAGCAGACTGAGGGGCA#.(((.....(((((((((((...#.))))))))))).....))).	3641	3675	1	-26.4	0	0.000521463	0.309	0	0	-14.727	14	21	11	3UTR		0	0
hsa-miR-221-3p	NM_001319141	AK2	AGCTACATTGTCTGCTGGGTTTC#GAAGCCCTTTCTTGTCGCTGGCAGCTGTGTGGTA#.(((((((.(.((((((((((((#)))))))............)))))).))))))).	1790	1824	1	-23.3	1	0.000204208	0.515	4.95667	4.87196	-7.67449	20	34	7	3UTR		0	0
hsa-miR-221-3p	NM_001319193	FBF1	AGCTACATTGTCTGCTGGGTTTC#AGCTCAGCGGGTACGCAGTGGAGGCG#.(((.((((((((((((((((..#))))))))))....))))))..))).	4480	4506	1	-22.9	0	0.000201761	0.426	0	0	-7.91236	19	26	10	3UTR		0	0
hsa-miR-221-3p	NM_001319674	GMEB1	AGCTACATTGTCTGCTGGGTTTC#AACCCAGCTTAGCGGTGTAGA#..(((((((((..((((((((..#))))))))...))))))))).	5835	5856	1	-24.6	1	0.00170922	0.5	0	0	-9.59293	17	21	9	3UTR		0	0
hsa-miR-221-3p	NM_001319994	PARPBP	AGCTACATTGTCTGCTGGGTTTC#GACTCTTCCCAGCATACATCTGAGCA#.(((.((.(((.(((((((....#.))))))).)))..))))).	2226	2252	1	-20	0	0.0220987	0.603	1.70061	0.972946	-13.5728	15	20	7	3UTR		0	0
hsa-miR-221-3p	NM_001320185	ZNF326	AGCTACATTGTCTGCTGGGTTTC#GCCCAGCTAATTTTTGTAGTTT#(((((((..((..(((((((...#)))))))..))...))))))).	2889	2911	1	-19.9	1	0.0457214	0.588	0	0	-11.9435	16	22	7	3UTR		0	0
hsa-miR-221-3p	NM_001320227	NMD3	AGCTACATTGTCTGCTGGGTTTC#GAATCACTTGAACCCAGGAGGCAGAGGTTGCA#.((.((.((((((.((((((((.#.)))))))).))))))..)).)).	1849	1881	1	-25.3	0	1.83937e-05	0.441	0	0	-9.22587	18	24	8	3UTR		0	0
hsa-miR-221-3p	NM_001320239	RANBP10	AGCTACATTGTCTGCTGGGTTTC#AGGCCCAGGAGATTAAGTGACTTGGCTA#(((((((((((((.((((((((.#)))))))).))))..))))...))))).	3877	3905	1	-22.6	1	0.000153482	0.574	0	0	-4.79441	21	28	8	3UTR		1	0
hsa-miR-221-3p	NM_001320261	SMIM12	AGCTACATTGTCTGCTGGGTTTC#AGATCTCTAAGCACTTGTAGGGTAGGGAGCCAGGGCAGTGTAGCA#.(((((((((((..((((.((((#.)))).))))))))))))))).	4626	4671	1	-26.2	1	0.00707429	0.529	0	0	-5.9393	19	22	15	3UTR		0	0
hsa-miR-221-3p	NM_001320485	TRABD	AGCTACATTGTCTGCTGGGTTTC#CTGGGCAGACAATGTGTGCA#.(((((((((((((((.((....#)).))))))))))))).)).	2017	2037	1	-26.2	1	8.2907e-05	0.412	0	0	-3.79332	17	20	13	3UTR		0	0
hsa-miR-221-3p	NM_001320632	BIN1	AGCTACATTGTCTGCTGGGTTTC#GCCCCGCAGACGGTCTGTGTGCTG#(((((((((((((((.((((...#)))).))))))))..)))).))).	1893	1917	1	-23.7	1	0.000153352	0.515	0	0	-4.17062	19	24	8	3UTR		0	0
hsa-miR-221-3p	NM_001320675	BNIP2	AGCTACATTGTCTGCTGGGTTTC#AGATCCAGCAGCTCTTGGCA#.((((....(.(((((((((((.#))))))))))))...)))).	2820	2840	1	-20.2	0	0.00206365	0.544	0	0	-13.4328	16	20	12	3UTR		0	0
hsa-miR-221-3p	NM_001320699	SETDB2	AGCTACATTGTCTGCTGGGTTTC#GAAGCCCAAGCAGACTGGGAAACCAGACAGCTA#((((.....((((((((((((((#)))))))).)))))).............)))).	4020	4053	1	-23.1	0	0.000234764	0.471	0	0	-14.8713	18	33	8	3UTR		0	0
hsa-miR-221-3p	NM_001320722	CACNB4	AGCTACATTGTCTGCTGGGTTTC#GGACTCATGTGACAATGTGGA#..((((((((((.(((((((((.#))))))).)))))))))))).	4812	4833	1	-21	1	0.000709445	0.662	0	0	-6.24613	19	21	12	3UTR		1	1
hsa-miR-221-3p	NM_001320755	SUPT6H	AGCTACATTGTCTGCTGGGTTTC#AGGCTGGGAGGGGAGTGTGGCA#.((((((((.(((.((.(((((.#))))).)).))).)))))))).	5685	5707	1	-21.6	1	0.037227	0.368	0	0	-5.89267	18	22	8	3UTR		0	0
hsa-miR-221-3p	NM_001320808	LPGAT1	AGCTACATTGTCTGCTGGGTTTC#GGACCTGTGCAGACAGTAGTC#.(((((..((((((((((((((.#))))))).)))))))))))).	3105	3126	1	-22.2	0	2.97295e-06	0.485	0	0	-7.65065	19	21	12	3UTR		0	0
hsa-miR-221-3p	NM_001320854	ARHGEF7	AGCTACATTGTCTGCTGGGTTTC#CCTGTGGCAGTGGCGATGTGGCA#.((((((((((((((((((....#)))..)))))..)))))))))).	4083	4106	1	-23.1	1	2.04633e-06	0.5	0	0	-3.79332	18	23	10	3UTR		1	1
hsa-miR-221-3p	NM_001320899	FHIT	AGCTACATTGTCTGCTGGGTTTC#AAATCACCCTCAGTCTTCCCAGCAGTCAGATGTGGTA#.(((((((((.((((((((....#.)))))))).))).)))))).	3060	3097	1	-26.3	1	0.000828405	0.559	0.193749	0.493285	-6.6181	17	21	8	3UTR		0	0
hsa-miR-221-3p	NM_001321081	EZH1	AGCTACATTGTCTGCTGGGTTTC#GGGCCCAGGAGGCTTTGAGA#..((.((..((((.((((((((.#)))))))).))))..)))).	3044	3064	1	-21.3	0	0.00256418	0.529	0	0	-13.3029	16	20	8	3UTR		0	0
hsa-miR-221-3p	NM_025196	GRPEL1	AGCTACATTGTCTGCTGGGTTTC#AACCTAGAGGCAATATAGCTT#(((((.(((((((.(((((((..#)))))))))))))).))))).	2245	2266	1	-22.5	0	0.000509196	0.691	0	0	-6.69537	19	21	14	3UTR		0	0
hsa-miR-221-3p	NM_025218	ULBP1	AGCTACATTGTCTGCTGGGTTTC#GGAGTTCAAGCCTTAGCAAGCCCAGAGGCCCCCAGCAGACGATGAGG#..((.((((((((((((((....#.)))))))))))))))).	966	1013	1	-27.9	0	0.000978393	0.412	0.445979	0.404151	-9.07604	16	18	16	3UTR		0	0
hsa-miR-221-3p	NM_025221	KCNIP4	AGCTACATTGTCTGCTGGGTTTC#GCTCAGCTTGACACTGAAGCA#.(((.((.((((.(((((((...#)))))))..)))).)).))).	980	1001	1	-20.4	0	0.000146574	0.662	0.737036	0.291179	-11.5151	16	21	7	3UTR		0	0
hsa-miR-221-3p	NM_025235	TNKS2	AGCTACATTGTCTGCTGGGTTTC#GCCCACAGGCCTGTGGCA#.((((((..(((((.(((((...#)))))))))).)))))).	3861	3879	1	-22.6	1	4.00159e-06	0.618	1.34449	2.08842	-7.8988	16	18	10	3UTR	MIRT046944	0	0
hsa-miR-221-3p	NM_030571	NDFIP1	AGCTACATTGTCTGCTGGGTTTC#GAAACCAGTGGGTTATAATGTAGA#..((((((((((((((.((((((#)))))))))))...))))))))).	1790	1814	1	-20	1	0.00119596	0.618	1.67931	2.81441	-4.957	20	24	11	3UTR	MIRT024174	1	1
hsa-miR-221-3p	NM_030576	LIMD2	AGCTACATTGTCTGCTGGGTTTC#AAACCCAGGGACAATGAGG#..((.((((((((.((((((((.#)))))))))))))))))).	1901	1920	1	-23	0	0.000789753	0.5	0.265733	-0.0254383	-9.93288	18	19	18	3UTR		0	0
hsa-miR-221-3p	NM_030613	ZFP2	AGCTACATTGTCTGCTGGGTTTC#AGCCCAGAGACCTGGTATGTAGTC#.(((((((.((((.(((((((..#))))))))))).....))))))).	2235	2259	1	-21.1	1	0.000108774	0.5	-0.325584	0.197959	-5.70655	18	24	11	3UTR		0	0
hsa-miR-221-3p	NM_030624	KLHL15	AGCTACATTGTCTGCTGGGTTTC#ACCCAGCGACACTAGGGATGTAAGCC#.(((((((((((.(((((((...#)))))))))))......))))).)).	3299	3325	1	-21.2	1	0.000468372	0.632	1.9367	2.06563	-5.08246	18	26	11	3UTR		0	0
hsa-miR-221-3p	NM_030626	LRRC27	AGCTACATTGTCTGCTGGGTTTC#GAACCCAGGAGACGGAGCTT#((((...((((((.((((((((.#)))))))).)))))))))).	4556	4576	1	-23.7	0	0.00199436	0.368	0.0657559	-0.0554863	-12.3581	18	20	10	3UTR		0	0
hsa-miR-221-3p	NM_030634	ZNF436	AGCTACATTGTCTGCTGGGTTTC#AAATCTAGCAGACTGTGGGTA#(.(((((..(((((((((((((.#)))))))))))))))))).).	3608	3629	1	-23.3	0	0.000739364	0.662	1.4858	0.557984	-8.47127	19	21	18	3UTR		0	0
hsa-miR-221-3p	NM_030660	ATXN3	AGCTACATTGTCTGCTGGGTTTC#ACCCGGCAGATTTTTGTAT#...((((..(((((((((((...#)))))))))))...)))).	3153	3172	1	-21.7	0	0.00807648	0.515	-0.273816	0.155483	-9.88456	15	19	11	3UTR		0	0
hsa-miR-221-3p	NM_030667	PTPRO	AGCTACATTGTCTGCTGGGTTTC#AACCCAGGAAGGAACAGGCATTGTTAGCA#.((((((.(((((((((((((..#))))))).......)))))).))).))).	4296	4325	1	-22.7	1	0.0313816	0.574	1.0845	1.20591	-6.10696	19	29	7	3UTR		0	0
hsa-miR-221-3p	NM_030766	BCL2L14	AGCTACATTGTCTGCTGGGTTTC#GAGGCATCAGGAGAGGTCTCGTTCGTCTCCAGCTCATAAAATGTAGCA#.((((((((....((((((....#.))))))......)))))))).	1536	1584	1	-20.4	1	0.0492196	0.544	0	0	-12.4965	14	22	8	3UTR		0	1
hsa-miR-221-3p	NM_030815	PDRG1	AGCTACATTGTCTGCTGGGTTTC#GCCTAGCAGCCCTTCGTGGCC#.((((((..(.(((((((((...#))))))))).)..).))))).	1077	1098	1	-20.6	1	0.000307324	0.441	-0.0479627	-0.039907	-9.98812	16	21	9	3UTR		0	0
hsa-miR-221-3p	NM_030817	APOLD1	AGCTACATTGTCTGCTGGGTTTC#GAGATATTAAATGAGCCAAAGTGCCTAGCATGATGGTGCTGGCTC#((((((((((((((((((((...#.)))))))).))))))).))))).	1664	1709	1	-24.8	1	0.000179051	0.559	-0.313272	0.0139104	-3.93757	20	24	8	3UTR		0	1
hsa-miR-221-3p	NM_030891	LRRC3	AGCTACATTGTCTGCTGGGTTTC#GGGGCCCTGCAGGCTGTGGA#..(((((..((((((.(((((((#))))))).))))))))))).	1380	1400	1	-24.1	0	0.000126879	0.368	0	0	-8.56007	18	20	11	3UTR		0	0
hsa-miR-221-3p	NM_030918	SNX27	AGCTACATTGTCTGCTGGGTTTC#GAGCTTTTTATGGCCCAGGAGAAAATGTAGA#..(((((((.(((.(((((((..#.))))))).))).))))))).	6049	6080	1	-24.7	1	0.0610269	0.515	0	0	-7.05635	17	21	7	3UTR		0	0
hsa-miR-221-3p	NM_030927	TSPAN14	AGCTACATTGTCTGCTGGGTTTC#GGAGCCCAGCTTGGAGAAGGAGGACGTGAGTA#.(((.((.(((((((((((((((#))))))))))...........)))))))))).	5001	5033	1	-22	0	0.0123787	0.515	0	0	-10.226	20	32	10	3UTR		0	0
hsa-miR-221-3p	NM_030946	OR14J1	AGCTACATTGTCTGCTGGGTTTC#GAAACCCAGGACCCCAGTAGCG#.(((((...(((..(((((((((#))))))))))))....))))).	5760	5782	1	-22.6	0	0.0174379	0.456	0	0	-10.853	17	22	12	3UTR		0	0
hsa-miR-221-3p	NM_030954	RNF170	AGCTACATTGTCTGCTGGGTTTC#GGATGTGAGGGGATGCCCAGGAGTCAGTGTTAGCA#.(((((((((.((.((((((.((#.)).)))))).)).)))))).))).	2291	2326	1	-27	1	0.000385696	0.544	0	0	-7.47494	19	25	6	3UTR		0	0
hsa-miR-221-3p	NM_030958	SLCO5A1	AGCTACATTGTCTGCTGGGTTTC#GAGTGCTGCGGCTGGCAGGCAAAGGTAGTTG#((((((.(((((((((((.(...#.).)))))))))))..)))))).	7723	7754	1	-22.9	0	4.77063e-06	0.574	0	0	-5.48126	18	23	11	3UTR		0	0
hsa-miR-221-3p	NM_030964	SPRY4	AGCTACATTGTCTGCTGGGTTTC#GAGCCACTGAGGGACCCAGCACTCAGAGACACAACACACATGTGTAGCTG#(((((((((((((((((((((((#.)))))))))))......))))..........)))))))).	3875	3925	1	-28.6	1	1.62287e-05	0.471	0	0	-3.93757	23	41	11	3UTR		0	0
hsa-miR-221-3p	NM_031226	CYP19A1	AGCTACATTGTCTGCTGGGTTTC#GCTTAGCTCAATTAGTGTGGCTA#((((((((((...(((((((...#))))))).....)))))))))).	2612	2635	1	-20.2	1	0.000156738	0.618	0	0	-11.3983	17	23	10	3UTR		0	0
hsa-miR-221-3p	NM_031369	HNRNPD	AGCTACATTGTCTGCTGGGTTTC#GAGCAAGTCTTGTGTTAAAAGCCCAGTGTGACAGTGTC#....((((((((((((((((((.#.)))))))))).)))))))).	1591	1629	1	-24.4	0	0.000868688	0.603	0	0	-9.54656	18	21	10	3UTR	MIRT024179	0	0
hsa-miR-221-3p	NM_031417	MARK4	AGCTACATTGTCTGCTGGGTTTC#GGAGCCCAGAAGAGAAAGTGGG#..((((.((.(((.(((((((((#))))))))).))).)).)))).	3731	3753	1	-23	0	0.0108365	0.456	0	0	-8.60003	18	22	9	3UTR		0	0
hsa-miR-221-3p	NM_031462	CD99L2	AGCTACATTGTCTGCTGGGTTTC#GAAGCCTGGCGGGCTCTGG#.....((..((((((((((((((#))))))))))))))..)).	3151	3170	1	-23.1	0	4.13303e-07	0.412	0	0	-17.0356	16	19	14	3UTR		0	0
hsa-miR-221-3p	NM_031464	RPS6KL1	AGCTACATTGTCTGCTGGGTTTC#CCCAGTGGGCCTGTGTGGG#..((((((.((((((((((....#))))))))))..)))))).	3014	3033	1	-23.6	1	7.28376e-05	0.324	0	0	-6.01339	16	19	10	3UTR		0	0
hsa-miR-221-3p	NM_031469	SH3BGRL2	AGCTACATTGTCTGCTGGGTTTC#GAGGCAGCAGCACAGTGTGTGGCA#.((((((((((((((((......#.)))))).)))..))))))).	2625	2649	1	-21.9	1	0.000125209	0.5	0	0	-3.79332	16	21	7	3UTR		0	0
hsa-miR-221-3p	NM_031471	FERMT3	AGCTACATTGTCTGCTGGGTTTC#CCCAGCACACAAGGAAGACCAGATGTAGCTA#(((((((((((((((((((....#))))))).........)))..))))))))).	2377	2408	1	-24.6	1	0.00198596	0.515	0	0	-3.93757	19	31	9	3UTR		0	0
hsa-miR-221-3p	NM_031482	ATG10	AGCTACATTGTCTGCTGGGTTTC#CCAGCAAAGTGTGGCA#.((((((((...((((((.....#)))))).)))))))).	1892	1908	1	-20.8	1	0.000823878	0.706	0	0	-11.2074	14	16	8	3UTR		0	0
hsa-miR-221-3p	NM_031485	GRWD1	AGCTACATTGTCTGCTGGGTTTC#ACCCAGAGACTTGTGTGGCC#.(((((((.((((.((((((...#))))))))))..))))))).	1586	1606	1	-24.8	1	2.12101e-05	0.412	0	0	-5.70655	17	20	10	3UTR		0	0
hsa-miR-221-3p	NM_031497	PCDHA3	AGCTACATTGTCTGCTGGGTTTC#GAAACCTGGTTAATACTCATTGACAGTGTGGG#..((((((((((.((((((((((#))))))))))...........)))))))))).	3757	3789	1	-23.1	1	0.000676373	0.632	0	0	-6.24613	20	32	10	3UTR	MIRT053721	1	1
hsa-miR-221-3p	NM_031845	MAP2	AGCTACATTGTCTGCTGGGTTTC#GACCCAGTGGATATGGCA#.((((...(((((((((((((..#))))))))))))))))).	3623	3641	1	-22.7	0	0.000712018	0.515	0	0	-9.55161	17	18	17	3UTR		0	0
hsa-miR-221-3p	NM_031882	PCDHAC1	AGCTACATTGTCTGCTGGGTTTC#GGCCCGGAGATGGCTGCTAGCTG#(((((((((((((.(((((((..#))))))))))))).)).))))).	2640	2663	1	-20.5	1	0.000350274	0.574	0.217952	0.606978	-4.79441	20	23	13	3UTR	MIRT053714	1	1
hsa-miR-221-3p	NM_031901	MRPS21	AGCTACATTGTCTGCTGGGTTTC#GAGACCAGCTTGGCCAATGTGGTG#.(((((((((((.(((.((((((#)))))))))..))).)))))))).	735	759	1	-22.2	1	4.17643e-05	0.559	0	0	-5.08246	20	24	9	3UTR		0	0
hsa-miR-221-3p	NM_031911	C1QTNF7	AGCTACATTGTCTGCTGGGTTTC#AACCCTTTAATGAGCCTGTAAGGACCAGACACTGTGGCG#.((((((.((((((((((((((.#.))))))...))...)))))).)))))).	1475	1514	1	-21.6	1	0.00228607	0.588	0	0	-6.10696	20	29	6	3UTR		0	0
hsa-miR-221-3p	NM_031936	GPR61	AGCTACATTGTCTGCTGGGTTTC#CCAGCAGGTGGCAGTGTGAGCC#.(((((((((((((((((.....#)))))))...))))))).))).	3429	3451	1	-23.5	1	5.14659e-05	0.471	0	0	-3.79332	17	22	7	3UTR		0	0
hsa-miR-221-3p	NM_031940	TM2D2	AGCTACATTGTCTGCTGGGTTTC#GGTGGGCAATGTGGCC#.(((((((((((((((.......#))))))))))))))).	2102	2118	1	-22.4	1	0.000188967	0.632	0	0	-3.79332	15	16	15	3UTR		0	0
hsa-miR-221-3p	NM_032041	NCALD	AGCTACATTGTCTGCTGGGTTTC#GGGGCCCACTCCCCTCTCTTCCCCAGCAGGCTGTAGTTT#(((((((..((((((((((....#.))))))))))))))))).	1223	1262	1	-26.4	1	0.0106941	0.515	0	0	-7.3076	17	19	17	3UTR		0	0
hsa-miR-221-3p	NM_032042	FAM172A	AGCTACATTGTCTGCTGGGTTTC#GAACAATTATTTTAATCCAGCTAAGATGTGGCC#.((((((((....((((((((..#.))))))))...)))))))).	2627	2660	1	-23	1	0.0060677	0.632	0	0	-12.4965	16	21	8	3UTR		0	0
hsa-miR-221-3p	NM_032044	REG4	AGCTACATTGTCTGCTGGGTTTC#GGCCCAGTAGTGGCTTCTAGCTC#(((((......((((((((((..#)))))))))).......))))).	789	812	1	-19.9	0	0.000290127	0.5	0	0	-14.8195	15	23	10	3UTR		0	0
hsa-miR-221-3p	NM_032045	KREMEN1	AGCTACATTGTCTGCTGGGTTTC#ACCCAGCAGAAGATGAGG#..((.((((.((((((((((...#)))))))))).)))))).	2380	2398	1	-23.2	0	0.00884783	0.471	0	0	-10.3185	16	18	10	3UTR		0	0
hsa-miR-221-3p	NM_032103	PPP1R12B	AGCTACATTGTCTGCTGGGTTTC#GCCCAGCCTCCCAGACAATGTTCCCCGGCA#.(((((((((((((((((((...#))))))).....))))))))).....))).	11206	11236	1	-24.8	1	0.0261012	0.309	0	0	-3.79332	19	30	9	3UTR		0	0
hsa-miR-221-3p	NM_032111	MRPL14	AGCTACATTGTCTGCTGGGTTTC#GGAGCTTGGGAGCCACATGGCTGCTCCCTTCACACTGGGTAACAGTGTAGTA#.((((((((((.((((.(((...#.))).)))))))))))))).	633	685	1	-20.7	1	0.000213311	0.588	0	0	-7.14013	17	20	14	3UTR		0	0
hsa-miR-221-3p	NM_032115	KCNK16	AGCTACATTGTCTGCTGGGTTTC#AAGCTCATGGACAAGTGGCA#.(((((.(((((((.(((((((.#))))))))))))))))))).	1212	1232	1	-20.7	0	0.00304438	0.456	0	0	-6.07246	19	20	19	3UTR		0	0
hsa-miR-221-3p	NM_032125	TMEM222	AGCTACATTGTCTGCTGGGTTTC#CCCAGCCCCAGGTGTGGA#..(((((((....((((((....#))))))....))))))).	1377	1395	1	-19.3	1	5.4626e-05	0.353	0	0	-13.6602	13	18	7	3UTR		0	0
hsa-miR-221-3p	NM_032128	SLC10A7	AGCTACATTGTCTGCTGGGTTTC#GGGGCATAACTCATTAGCAGATATGTAGTG#.((((((.(((((((((((((..#.))))))...))))))))))))).	1412	1442	1	-20.9	1	0.0183352	0.691	0	0	-6.10696	19	24	13	3UTR	MIRT649464	0	1
hsa-miR-221-3p	NM_032151	PCBD2	AGCTACATTGTCTGCTGGGTTTC#GGGTCTCATTCTGTTGCCCAGGCAGTAGTGTAGTG#.(((((((((.(((((((((...#.)))))).)))))))))))).	1836	1871	1	-24.9	1	0.000456432	0.441	0	0	-6.6181	18	21	12	3UTR		0	0
hsa-miR-221-3p	NM_032167	SNX29	AGCTACATTGTCTGCTGGGTTTC#GAGTTATGGAGCAGAAACACCCAGGCCTAGCAGAATTGTGGCTG#(((((((...((((((((((((.#.))))))))))))..))))))).	5114	5158	1	-27.5	1	0.000491543	0.456	2.91021	2.60179	-8.55011	19	23	12	3UTR		1	0
hsa-miR-221-3p	NM_032173	ZNRF3	AGCTACATTGTCTGCTGGGTTTC#AGCCTTAAGCAATAAATAGATGAGTAGAGAATGTGGCTT#(((((((((.(((((((((((..#))))).................)))))).))))))))).	4895	4934	1	-22.8	1	0.0327484	0.632	0	0	-5.18008	20	39	9	3UTR		0	0
hsa-miR-221-3p	NM_032177	PHAX	AGCTACATTGTCTGCTGGGTTTC#GAGACCAATCTAGGCAATGTAGTG#.(((((((((((((...((((((#))))))....))))))))))))).	2534	2558	1	-24.5	1	0.00277291	0.603	0	0	-4.76182	19	24	13	3UTR		0	0
hsa-miR-221-3p	NM_032193	RNASEH2C	AGCTACATTGTCTGCTGGGTTTC#AAGCCCAGGAACAGACAAGCCATGCC#.((....(((((((((((((((.#))))))))...))))))).....)).	1510	1536	1	-21.2	0	0.0555829	0.397	0.417692	0.42686	-14.389	17	26	8	3UTR		0	0
hsa-miR-221-3p	NM_032194	RPF2	AGCTACATTGTCTGCTGGGTTTC#GCAGATGGTGTAGA#..(((((((((((((........#))))))))))))).	2035	2049	1	-19.1	1	0.000135293	0.485	0	0	-5.19005	13	14	13	3UTR		0	0
hsa-miR-221-3p	NM_032208	ANTXR1	AGCTACATTGTCTGCTGGGTTTC#CCCAGGCTCACAGTGTAGA#..(((((((((..((((((....#))))).)..))))))))).	4194	4213	1	-21	1	6.25457e-05	0.515	0	0	-9.59293	15	19	9	3UTR		0	0
hsa-miR-221-3p	NM_032227	TMEM164	AGCTACATTGTCTGCTGGGTTTC#GGACCTCAAGCAGGCAGGAAGTGGCTG#((((((.(((((((((((((((.#))))))..)))))))))...)))))).	2526	2553	1	-25.5	0	3.88713e-06	0.441	0.888973	0.874356	-5.48126	21	27	9	3UTR		0	0
hsa-miR-221-3p	NM_032229	SLITRK6	AGCTACATTGTCTGCTGGGTTTC#AGAGGGACAATGTAGCTT#(((((((((((((.((.......#))..))))))))))))).	4085	4103	1	-19.9	1	0.00988301	0.632	0	0	-4.79441	15	18	13	3UTR		0	1
hsa-miR-221-3p	NM_032242	PLXNA1	AGCTACATTGTCTGCTGGGTTTC#CCCAGCGGCTTCCAGTGTGGCA#.(((((((((.((((((((....#))))))))....))))))))).	6879	6901	1	-26.8	1	6.25972e-05	0.353	0	0	-6.6181	17	22	9	3UTR		0	0
hsa-miR-221-3p	NM_032270	LRRC8C	AGCTACATTGTCTGCTGGGTTTC#CTCAGCACAGTGTGGCA#.((((((((((..((((((....#)))))))))))))))).	3560	3577	1	-23	1	0.00136064	0.544	0	0	-8.42926	16	17	16	3UTR		0	0
hsa-miR-221-3p	NM_032294	CAMKK1	AGCTACATTGTCTGCTGGGTTTC#CTGGGCTAAGGCAGTGTGGCC#.(((((((((((((((.((....#)).)))..)))))))))))).	3223	3244	1	-23.5	1	3.75065e-05	0.456	0	0	-3.79332	17	21	12	3UTR	MIRT053703	1	0
hsa-miR-221-3p	NM_032311	POLDIP3	AGCTACATTGTCTGCTGGGTTTC#GAACCCAGCTTCAGTGTGCA#.((.((((((...(((((((((.#)))))))))..)))))))).	2731	2751	1	-23.7	0	0.000707343	0.412	0	0	-14.2861	17	20	9	3UTR		0	0
hsa-miR-221-3p	NM_032316	NICN1	AGCTACATTGTCTGCTGGGTTTC#GAGACCTGTCCGAGCAGAGGCCTGGACTACATCTCCCGGCGTGCCTGGCAGTGTGGTG#.((((((((((((((((((....#.))))))).....))))))))))).	3015	3073	1	-25	1	7.70578e-05	0.338	2.17979	3.44238	-3.79332	18	25	11	3UTR		0	0
hsa-miR-221-3p	NM_032317	DNAJC30	AGCTACATTGTCTGCTGGGTTTC#GGGATTACAGCATAATGCTAGCAGGGCCAGGTTCATCCTTGAGACAGTGTGGCTG#(((((((((((((...((((...#.))))...))))))))))))).	1806	1861	1	-25	1	5.85258e-07	0.397	0	0	-5.76291	17	22	13	3UTR		0	0
hsa-miR-221-3p	NM_032333	PRXL2A	AGCTACATTGTCTGCTGGGTTTC#AGGCTCGGCATCCAGTGTGGA#..((((((((..((((((((((.#))))))))))..)))))))).	5169	5190	1	-22.8	1	0.000119081	0.485	0	0	-11.1286	18	21	10	3UTR		0	0
hsa-miR-221-3p	NM_032339	MIEN1	AGCTACATTGTCTGCTGGGTTTC#AACCCAGGGCAATGTCAGCTA#((((((((((((..(((((((..#))))))))))))))).)))).	700	721	1	-24.3	1	0.000784291	0.574	0	0	-6.08354	19	21	15	3UTR	MIRT046933	0	0
hsa-miR-221-3p	NM_032349	NUDT16L1	AGCTACATTGTCTGCTGGGTTTC#GGGGCCCAGCTATGTACAACGAAGCTG#((((.(.(((((.((((((((((#))))))))))...).)))).).)))).	1272	1299	1	-22	0	0.0019189	0.426	-0.47154	-0.19955	-10.8894	20	27	10	3UTR		0	0
hsa-miR-221-3p	NM_032354	TMEM107	AGCTACATTGTCTGCTGGGTTTC#CCCAGGCTCAGATGATCCTCCTGCATCAGCCTCCCAAGTAGCTG#(((((((((((((((((((....#)))))...)))))))).....................)))))).	1959	2003	1	-19.3	1	6.4956e-05	0.412	0	0	-3.93757	19	44	8	3UTR		0	0
hsa-miR-221-3p	NM_032359	CMSS1	AGCTACATTGTCTGCTGGGTTTC#GAAACCCAGCAGGGCAC#........(((((((((((((((#))))))))))))).)).	2078	2095	1	-23.2	0	0.00134685	0.559	0	0	-19.4239	15	17	13	3UTR		0	0
hsa-miR-221-3p	NM_032376	TMEM101	AGCTACATTGTCTGCTGGGTTTC#GAACCTGGCAGATGCAGCTA#((((.((...((((((((((((.#)))))))))))))).)))).	1169	1189	1	-21.6	0	0.000180361	0.529	0	0	-12.6691	18	20	14	3UTR		0	0
hsa-miR-221-3p	NM_032382	COG8	AGCTACATTGTCTGCTGGGTTTC#GAATCCCGGCCAGGCTTGGTGGCTC#((((((...((((((((((.(((#))).)))))).))))...)))))).	3582	3607	1	-26.1	0	7.92914e-05	0.456	0	0	-8.85129	19	25	6	3UTR		0	0
hsa-miR-221-3p	NM_032385	FAXDC2	AGCTACATTGTCTGCTGGGTTTC#GCCCAGTAGGCCAGCTGAGCA#.(((.(((((((((((((((...#))))))))))).)).))))).	2431	2452	1	-22.6	0	1.23407e-05	0.397	0	0	-7.91236	18	21	11	3UTR		0	0
hsa-miR-221-3p	NM_032387	WNK4	AGCTACATTGTCTGCTGGGTTTC#GAGGGGCCCACTCCCAGCTGGGAGAGTGTAGG#..(((((((.(((((((((....#.))))))..))).))))))).	4114	4146	1	-23.8	1	3.00138e-07	0.426	0	0	-6.19951	16	21	7	3UTR		0	0
hsa-miR-221-3p	NM_032414	PROK1	AGCTACATTGTCTGCTGGGTTTC#CCCAGTCAGCCTGTGGCTT#(((((((..(.((((((((....#))))).)))).))))))).	1002	1021	1	-20.2	1	4.38277e-05	0.382	0	0	-10.1324	16	19	7	3UTR		0	0
hsa-miR-221-3p	NM_032439	PHYHIPL	AGCTACATTGTCTGCTGGGTTTC#GAGCCTAGCAGACTTAAAGGACAAGGTAGTA#.(((((...(((((((((((((.#)))))))))))))............))))).	2834	2865	1	-24.7	0	0.0387153	0.632	0	0	-8.70704	18	31	13	3UTR		0	0
hsa-miR-221-3p	NM_032440	LCOR	AGCTACATTGTCTGCTGGGTTTC#GATTCTCAGTGGATAGTGTGT#...((((((((((((((((..((#))..)))))))))))))))).	7621	7642	1	-22.8	0	0.00209645	0.515	0	0	-6.51454	18	21	16	3UTR		0	0
hsa-miR-221-3p	NM_032444	SLX4	AGCTACATTGTCTGCTGGGTTTC#GAGGGCCCTCAGCTGTCCCAGGGGGCAGTGGGCC#.(((.((((((((.(((((....#.))))).))))))))))).	6757	6791	1	-25.3	0	5.27384e-08	0.324	0	0	-8.7692	16	19	11	3UTR		0	0
hsa-miR-221-3p	NM_032493	AP1M1	AGCTACATTGTCTGCTGGGTTTC#ACTCCAGCCTGGGCAATGAGCG#.(((.(((((((((((((((...#)).)))))..))))))))))).	8910	8932	1	-22.6	0	0.000386562	0.544	0	0	-7.91236	18	22	11	3UTR		0	0
hsa-miR-221-3p	NM_032494	ZC3H8	AGCTACATTGTCTGCTGGGTTTC#GAGACCAGCCTTGGCAACATAGCA#.((((..(((((.(((.((((((#)))))))))...)))))..)))).	4231	4255	1	-20.2	0	0.000831164	0.647	0	0	-8.5271	18	24	9	3UTR		0	0
hsa-miR-221-3p	NM_032509	MAK16	AGCTACATTGTCTGCTGGGTTTC#CCCAGTGACATGTGCTG#(((.(((.((((.((((((....#)))))))))))))))).	2388	2405	1	-19.7	0	0.00100097	0.5	0	0	-10.5724	16	17	16	3UTR		0	0
hsa-miR-221-3p	NM_032510	PARD6G	AGCTACATTGTCTGCTGGGTTTC#CCCAGCAGTCAGAAGCA#.(((...(((.((((((((....#)))))))).))).))).	3439	3456	1	-21.5	0	0.00852567	0.574	0	0	-14.1818	14	17	8	3UTR		0	0
hsa-miR-221-3p	NM_032522	ZBTB37	AGCTACATTGTCTGCTGGGTTTC#GAACCCGGGAGGCAGAGCTTGCAGTGAGCTG#((((.((((((((.((((((((.#)))))))).))))).........))))))).	9677	9708	1	-23.7	0	8.59341e-05	0.382	0	0	-8.91345	20	31	8	3UTR	MIRT533057	1	0
hsa-miR-221-3p	NM_032524	KRTAP4-4	AGCTACATTGTCTGCTGGGTTTC#GAGGCTGTCATCTGGACTCACCAGATTCTCATCAACCAGCATTCTTGATGTAGCTC#((((((((((..((((((.....#.))))))..)..))))))))).	781	837	1	-21.5	1	0.000617801	0.574	1.77932	1.3173	-10.1092	16	22	9	3UTR		0	0
hsa-miR-221-3p	NM_032528	ST6GAL2	AGCTACATTGTCTGCTGGGTTTC#GAGACTGAAGGCTTCTGTTTGGTTAGTCTATTCAGCAGATATGGAGCTG#((((.(..((((((((((((...#.))))))))))))..))))).	3347	3396	1	-22.3	0	6.21591e-05	0.588	0	0	-11.9139	17	21	12	3UTR		0	0
hsa-miR-221-3p	NM_032536	NTNG2	AGCTACATTGTCTGCTGGGTTTC#GGGGCCACCATTTCCCTGGGCCTTTCTGTGGATTCCAGCAGGCAGTGCCCCCTCCCCGCAGGCTTGGCTG#(((((((((((((((((((.(((#.))).)))))))))))))).................))))).	3077	3147	1	-27.1	1	2.33308e-05	0.309	0	0	-3.93757	22	42	14	3UTR		0	0
hsa-miR-221-3p	NM_032547	SCOC	AGCTACATTGTCTGCTGGGTTTC#GCCCATTTATAATGTAGTTG#(((((((((((....(((((...#)))))...))))))))))).	2785	2805	1	-18	1	0.000207124	0.559	0	0	-10.1658	16	20	11	3UTR		0	0
hsa-miR-221-3p	NM_032587	CARD6	AGCTACATTGTCTGCTGGGTTTC#ACTGAGCAGATAACCCTGCTTATTTGGTGTGGTTA#((((((((((((((((.(((...#))).))))))))..............)))))))).	3886	3921	1	-20.8	1	0.000538935	0.559	0	0	-3.93757	19	35	8	3UTR		0	0
hsa-miR-221-3p	NM_032588	TRIM63	AGCTACATTGTCTGCTGGGTTTC#TCCAGCAGACACTGA#.....((.(((((((((((....#))))))))))).)).	1378	1393	1	-20.6	0	0.00120065	0.485	0	0	-15.9792	13	15	11	3UTR		0	0
hsa-miR-221-3p	NM_032623	MGARP	AGCTACATTGTCTGCTGGGTTTC#AGCCGGTAGACATTTCAGCA#.(((....((((((((((.(...#).))))))))))....))).	795	815	1	-19.9	0	0.00360599	0.5	0	0	-13.6706	14	20	10	3UTR		0	0
hsa-miR-221-3p	NM_032638	GATA2	AGCTACATTGTCTGCTGGGTTTC#GGCCTGGCAGGGGGTGAAGGCA#.(((.((((.(((((((((((..#))))))))))).))))..))).	2888	2910	1	-23.5	0	0.00138427	0.338	0	0	-9.15487	18	22	11	3UTR		0	0
hsa-miR-221-3p	NM_032679	ZNF577	AGCTACATTGTCTGCTGGGTTTC#ACCTGGCCAGGCACAGTGGCTC#((((((..((((((((((((...#))))))).)))))..)))))).	2935	2957	1	-23.4	0	9.37529e-05	0.529	0	0	-7.7949	18	22	7	3UTR		0	0
hsa-miR-221-3p	NM_032718	MFSD9	AGCTACATTGTCTGCTGGGTTTC#GACCCAGAGACCAGTAGCA#.(((((...((((.(((((((..#)))))))))))..))))).	3884	3903	1	-23	0	0.0485635	0.515	0	0	-9.56388	16	19	11	3UTR		0	0
hsa-miR-221-3p	NM_032780	TMEM25	AGCTACATTGTCTGCTGGGTTTC#ACCCAGGACGGCTTGTAGCTA#(((((((..((((.((((((...#)))))).).))).))))))).	1920	1941	1	-23.4	1	0.000370826	0.485	0	0	-8.16444	17	21	7	3UTR		0	1
hsa-miR-221-3p	NM_032782	HAVCR2	AGCTACATTGTCTGCTGGGTTTC#GCCCTGCAGGGCTGAGATGTGGCA#.((((((((((((((.((((...#)))).))))).)...)))))))).	1855	1879	1	-23	1	8.29006e-05	0.456	0	0	-4.02637	18	24	8	3UTR		0	0
hsa-miR-221-3p	NM_032784	RSPO3	AGCTACATTGTCTGCTGGGTTTC#AAACCAGGACATGACAATGGTGGCA#.(((((((((((((((.(((((.#))))).)).)).))))))).)))).	3455	3480	1	-20.9	1	0.00302464	0.588	0	0	-3.79332	20	25	7	3UTR		0	0
hsa-miR-221-3p	NM_032788	ZNF514	AGCTACATTGTCTGCTGGGTTTC#GGGCCCATGCAGACAGGCTG#((((....((((((((((((((.#))))))).))))))))))).	4183	4203	1	-23.5	0	0.000193686	0.397	0	0	-13.8149	18	20	11	3UTR		0	0
hsa-miR-221-3p	NM_032795	RPUSD4	AGCTACATTGTCTGCTGGGTTTC#GCCCAGCTATAGTGTGGGTG#(.(((((((((..(((((((...#))))))).))))))))).).	1600	1620	1	-23.4	1	0.000181448	0.485	0	0	-9.73718	17	20	9	3UTR		0	0
hsa-miR-221-3p	NM_032796	SYAP1	AGCTACATTGTCTGCTGGGTTTC#GGCTCAGGAACCAGTGTAGCTT#((((((((((..(.(((((((..#))))))).)..)))))))))).	3531	3553	1	-22.9	1	0.00688554	0.485	0	0	-10.966	18	22	10	3UTR		0	0
hsa-miR-221-3p	NM_032797	AIFM2	AGCTACATTGTCTGCTGGGTTTC#GAGGCCCAGCTGGGCACTAATGTCTGCC#.((.(((((((((((((((((((#)))))))))).)))))...))))..)).	2547	2575	1	-25.3	0	6.83767e-05	0.529	0	0	-6.82535	21	28	10	3UTR		0	0
hsa-miR-221-3p	NM_032815	NFATC2IP	AGCTACATTGTCTGCTGGGTTTC#AGCCCAGCAGAGGCCTTAGTC#.((((...(.(((((((((((..#))))))))))).)...)))).	1742	1763	1	-22.8	0	0.00085866	0.441	0	0	-10.7941	16	21	11	3UTR		0	0
hsa-miR-221-3p	NM_032816	CEP89	AGCTACATTGTCTGCTGGGTTTC#GGAGCACAGCAGGCACTCAGAGCA#.(((....(((((((((.(((((#))))).))))))))).....))).	5053	5077	1	-22.6	0	0.00589369	0.353	0	0	-13.6706	17	24	9	3UTR		0	0
hsa-miR-221-3p	NM_032840	SPRYD3	AGCTACATTGTCTGCTGGGTTTC#GAGGCTTCGTTTACCCAGCAGGCCCCTGGAGGTGTGTAGTC#.(((((((.(((((((((((...#.)))))))))))..........))))))).	1460	1501	1	-26	1	1.52163e-06	0.353	0	0	-4.84971	18	30	11	3UTR	MIRT046953	0	0
hsa-miR-221-3p	NM_032842	TMEM209	AGCTACATTGTCTGCTGGGTTTC#AGATTTAACAGAAAATGTAGCTG#(((((((((.((((.(((((((.#))))))).)))).))))))))).	1840	1863	1	-19.7	1	0.00153395	0.735	0	0	-5.91553	20	23	9	3UTR		0	0
hsa-miR-221-3p	NM_032864	PRPF38A	AGCTACATTGTCTGCTGGGTTTC#TCCAGCAGCAGCAAGTGGTA#.(((((.((((((((((((....#))))))))..))))))))).	1538	1558	1	-21.4	0	0.00831252	0.618	0	0	-5.33701	17	20	9	3UTR		0	0
hsa-miR-221-3p	NM_032875	FBXL20	AGCTACATTGTCTGCTGGGTTTC#GAAACCCAGTGTGATTTTTAGTAGG#..((((...((((((((((((((#))))))))))).))).....)))).	3545	3570	1	-20.8	0	0.00921904	0.544	0	0	-9.87071	18	25	11	3UTR		0	0
hsa-miR-221-3p	NM_032905	RBM17	AGCTACATTGTCTGCTGGGTTTC#GAAGTTCAGTAGGATGTGTGGCTT#((((((((..(((((((((((((#)))))))))))))..)))))))).	2310	2334	1	-23	1	0.00514019	0.691	0	0	-6.23647	21	24	13	3UTR		0	0
hsa-miR-221-3p	NM_032961	PCDH10	AGCTACATTGTCTGCTGGGTTTC#ACTCAGGCAGAGTGTGGCA#.(((((((..((((((((((...#)))))).))))))))))).	7407	7426	1	-21.6	1	0.00117755	0.662	0	0	-6.09222	17	19	11	3UTR		0	0
hsa-miR-221-3p	NM_032962	CCL14	AGCTACATTGTCTGCTGGGTTTC#CTCAGCAACAACAGTAGCA#.(((((.((((.(((((((....#)))))))))))..))))).	749	768	1	-19.6	0	0.00520079	0.559	0	0	-8.68381	16	19	11	3UTR		0	0
hsa-miR-221-3p	NM_032978	DTNA	AGCTACATTGTCTGCTGGGTTTC#AGAGCCAGCAGGGGGAGCAGCA#.(((.(.((.((((((((.(((.#))).)))))))).)).).))).	2645	2667	1	-21.8	0	0.00499264	0.588	0	0	-10.6986	17	22	8	3UTR		0	0
hsa-miR-221-3p	NM_033000	GTF2I	AGCTACATTGTCTGCTGGGTTTC#ACTCAGCAGAGCCTTGAGTTA#((((.((...((((((((((...#))))))))))....)))))).	3585	3606	1	-19.1	0	0.0160119	0.632	0	0	-12.6691	16	21	10	3UTR		0	0
hsa-miR-221-3p	NM_033017	TRIM4	AGCTACATTGTCTGCTGGGTTTC#GATTGTCTGGACTCAGGAGATTGTGGCA#.((((((..((((.((((((((.#.)))))))).)))))))))).	2694	2722	1	-23.5	1	0.000391622	0.618	0	0	-8.02019	18	21	10	3UTR		0	0
hsa-miR-221-3p	NM_033036	GAL3ST3	AGCTACATTGTCTGCTGGGTTTC#GATGCCCAGGAGGAGCTGTGGCTG#(((((((...(((.((((((.((#)).)))))).)))...))))))).	2167	2191	1	-25.5	1	8.20425e-05	0.412	0	0	-9.40695	18	24	7	3UTR		0	0
hsa-miR-221-3p	NM_033070	HDHD5	AGCTACATTGTCTGCTGGGTTTC#GGGACTTCTGAAATGGGGGAGGCAGTGTGGA#..(((((((((((.((..(((((#.)))))..)).))))))))))).	1600	1631	1	-21.1	1	5.88675e-05	0.5	0	0	-5.81384	18	23	11	3UTR		0	0
hsa-miR-221-3p	NM_033083	EAF1	AGCTACATTGTCTGCTGGGTTTC#TTCAGCGGACATCAAGGTAGTA#.(((((..(((((((((((....#))))))))))).....))))).	2320	2342	1	-21.2	0	0.00135553	0.574	0	0	-7.65065	16	22	11	3UTR		0	0
hsa-miR-221-3p	NM_033109	PNPT1	AGCTACATTGTCTGCTGGGTTTC#ATCTGGCCAGGCATGGTGGCTC#((((((..((((((((((((...#))))))).)))))..)))))).	3750	3772	1	-22.6	0	0.000109049	0.544	0	0	-7.7949	18	22	7	3UTR		0	0
hsa-miR-221-3p	NM_033115	TBCK	AGCTACATTGTCTGCTGGGTTTC#GAACCCAGGAGGCAGAGCTT#((((...((((((.((((((((.#)))))))).)))))))))).	6912	6932	1	-23.9	0	0.00230011	0.397	0	0	-12.3581	18	20	10	3UTR		0	0
hsa-miR-221-3p	NM_033119	NKD1	AGCTACATTGTCTGCTGGGTTTC#CCCAGTGAGACAGCTGCTGTGGCA#.((((((((((((((((((....#)))))).))))))....)))))).	10578	10602	1	-24.1	1	8.47677e-06	0.412	0	0	-3.79332	18	24	6	3UTR		0	0
hsa-miR-221-3p	NM_033135	PDGFD	AGCTACATTGTCTGCTGGGTTTC#CAGCTCACAATGTAGCTG#(((((((((((..((((......#))))..))))))))))).	3304	3322	1	-23.3	1	0.000453612	0.632	0	0	-8.57351	15	18	11	3UTR		0	0
hsa-miR-221-3p	NM_033140	CALD1	AGCTACATTGTCTGCTGGGTTTC#GATACCTGTAGTAAGTTGACAATGTGGTG#.(((((((((((.(((((((.((#)).))))......))).))))))))))).	3066	3095	1	-21.1	1	0.000862214	0.721	1.67287	2.39609	-5.08246	20	29	11	3UTR		0	0
hsa-miR-221-3p	NM_033159	HYAL1	AGCTACATTGTCTGCTGGGTTTC#GAACCACAGCAGACAC#........((((((((((((((.#))))).))))))))).	1628	1644	1	-21.4	0	0.0668353	0.574	4.94662	3.246	-19.4239	14	16	9	3UTR		0	0
hsa-miR-221-3p	NM_033181	CNR1	AGCTACATTGTCTGCTGGGTTTC#ACCCAGCCCATGTGGCTA#(((((((.((...(((((((...#))))))).))))))))).	2933	2951	1	-22.1	1	0.000410757	0.544	0	0	-13.7119	16	18	9	3UTR		0	1
hsa-miR-221-3p	NM_033191	KRTAP9-4	AGCTACATTGTCTGCTGGGTTTC#CCAGCAGAGATTCTTAGCTA#(((((...(.((((((((.....#)))))))).)....))))).	915	935	1	-21	0	3.97007e-07	0.618	0.338739	0.405711	-10.9384	14	20	8	3UTR		0	0
hsa-miR-221-3p	NM_033226	ABCC12	AGCTACATTGTCTGCTGGGTTTC#GGAGCCTGGCGGACACCCCTCCCAGGTGTGTGTGCA#.((((((((((((((((((((((#)))))))))))))))............))))).)).	5784	5820	1	-26.4	1	2.96292e-05	0.441	0	0	-3.79332	22	36	15	3UTR		0	0
hsa-miR-221-3p	NM_033238	PML	AGCTACATTGTCTGCTGGGTTTC#GGGGCCCAGCAGTCTGTGTT#....((((.(.((((((((((((#)))))))))))).).)))).	3635	3655	1	-24.5	0	3.59852e-05	0.456	0	0	-13.4277	17	20	12	3UTR		0	0
hsa-miR-221-3p	NM_033254	BOC	AGCTACATTGTCTGCTGGGTTTC#GAGGCCCACAGATAAGCTGGCA#.((((..(((((((.((((((((#)))))))))))))))..)))).	4279	4301	1	-25	0	0.00328942	0.397	0	0	-7.97342	19	22	15	3UTR		0	0
hsa-miR-221-3p	NM_033274	ADAM19	AGCTACATTGTCTGCTGGGTTTC#GACTCAGACAGGTACTATTCGTAGGCAGTGTAGA#..(((((((((((((((((((..#))))))..............))))))))))))).	3469	3503	1	-21.6	1	0.0108515	0.441	0	0	-4.957	19	34	13	3UTR		0	0
hsa-miR-221-3p	NM_033300	LRP8	AGCTACATTGTCTGCTGGGTTTC#GAAGCTCAGAGACAATGC#.....((((((((.(((((((((#))))))))))))))))).	5214	5232	1	-22.7	0	0.00750551	0.529	0	0	-14.5224	17	18	17	3UTR		0	0
hsa-miR-221-3p	NM_033309	B3GNT9	AGCTACATTGTCTGCTGGGTTTC#GAACCTGGCAGGCACTTTGCCATAGCTC#(((((((.((((((((((((((.#))))))))))))))...))...))))).	1964	1992	1	-24	1	0.000695399	0.559	0	0	-6.25121	21	28	14	3UTR		0	0
hsa-miR-221-3p	NM_033358	CASP8	AGCTACATTGTCTGCTGGGTTTC#GAAGCCTGCAGAATCCAGCTA#((((......(((((.(((((((#))))))))))))....)))).	1058	1079	1	-18.8	0	0.00028235	0.6	0	0	-16.3468	16	21	12	3UTR		0	0
hsa-miR-221-3p	NM_033403	DCLK3	AGCTACATTGTCTGCTGGGTTTC#GGACTCAGACCCCTGAGGAGTGGGTGCTGCCCAGCAGGCAGTGTAA#...(((((((((((((((((...#.))))))))))))))))).	4242	4288	1	-31	0	8.67333e-05	0.426	0.770665	0.73827	-6.51454	17	19	17	3UTR		0	0
hsa-miR-221-3p	NM_033429	CALML4	AGCTACATTGTCTGCTGGGTTTC#GAAGCCCAGGTCCACACAGTGTAGG#..(((((((((.(((((((((((#)))))))))...)).))))))))).	2101	2126	1	-25.5	1	0.00156041	0.456	1.12656	0.925372	-8.3038	20	25	9	3UTR		0	0
hsa-miR-221-3p	NM_033503	BMF	AGCTACATTGTCTGCTGGGTTTC#GAGACCCAGTGAGAATGTAGCA#.((((((((.((.((((((((((#)))))))))))).)))))))).	4500	4522	1	-31	1	0.0428718	0.441	3.54036	3.52055	-6.32496	20	22	12	3UTR	MIRT000141	1	1
hsa-miR-221-3p	NM_033510	DISP2	AGCTACATTGTCTGCTGGGTTTC#GAACCCAGGAGGCAGAGCTT#((((...((((((.((((((((.#)))))))).)))))))))).	7913	7933	1	-23.9	0	0.0022374	0.441	0	0	-12.3581	18	20	10	3UTR		0	0
hsa-miR-221-3p	NM_033656	BRWD1	AGCTACATTGTCTGCTGGGTTTC#AAGCATAGCCGACAATGGTAGCTT#((((((((((((.((((.((((.#)))).)))).))))))).))))).	9201	9225	1	-22	1	0.00022161	0.647	0	0	-5.22671	20	24	7	3UTR	MIRT705231	1	1
hsa-miR-221-3p	NM_052817	MID2	AGCTACATTGTCTGCTGGGTTTC#AAACCCAGCTGGACAAAGAGA#..((.(.(((((((((((((((.#))))))))).)))))).))).	6330	6351	1	-21.8	0	0.00930354	0.632	0	0	-10.6197	18	21	9	3UTR		0	0
hsa-miR-221-3p	NM_052834	WDR7	AGCTACATTGTCTGCTGGGTTTC#AAACCCTGGGGTGGACGATGTT#....((((((((((((((((((.#))))))...)))))))))))).	6746	6768	1	-21.5	0	0.00228716	0.544	0	0	-9.54656	18	22	12	3UTR		0	0
hsa-miR-221-3p	NM_052898	XKR4	AGCTACATTGTCTGCTGGGTTTC#GAACCCAGGAGGCAGAGCTT#((((...((((((.((((((((.#)))))))).)))))))))).	10902	10922	1	-23.9	0	0.0014287	0.426	0	0	-12.3581	18	20	10	3UTR		0	0
hsa-miR-221-3p	NM_052903	TUBGCP5	AGCTACATTGTCTGCTGGGTTTC#GAAACCCGGTGTCTACCAAAAATACAAAATGTATCCAGACATGGTGGTG#.(((((..(((((((((((((((#)))))))))..........................))))))..))))).	3323	3372	1	-25.2	0	0.000470634	0.544	1.10662	1.06525	-7.65065	20	49	9	3UTR		0	0
hsa-miR-221-3p	NM_052906	ELFN2	AGCTACATTGTCTGCTGGGTTTC#GGCCCAGCGGGGTGTGGG#..((((((..(((((((((((..#))))))))))))))))).	4854	4872	1	-24.1	1	2.31335e-09	0.324	1.76295	2.27042	-7.2559	17	18	17	3UTR		0	0
hsa-miR-221-3p	NM_052911	ESCO1	AGCTACATTGTCTGCTGGGTTTC#ATGCAGCAGATAATTGTTCATAGTGGACTG#(((((((((((((((((.((...#)).)))))))))))........)))).)).	3686	3716	1	-18.9	1	0.000862673	0.618	4.01392	2.84921	-3.93757	19	30	11	3UTR		0	0
hsa-miR-221-3p	NM_052916	RNF157	AGCTACATTGTCTGCTGGGTTTC#GGCCAGCAGCAGTGTGCTG#(((.((((((.(((((((.(...#).)))))))))))))))).	3553	3572	1	-24	0	2.06514e-07	0.397	2.07407	1.06299	-9.79437	17	19	16	3UTR		0	0
hsa-miR-221-3p	NM_052929	FHAD1	AGCTACATTGTCTGCTGGGTTTC#AGGCCTGGTAGATATAATTATGTGGTC#.(((((((((((((((((((((.#)))))))))))))).....))))))).	4679	4706	1	-22.9	1	0.00777603	0.544	-0.240887	-0.0161521	-3.79332	21	27	14	3UTR		0	0
hsa-miR-221-3p	NM_052943	TENT5B	AGCTACATTGTCTGCTGGGTTTC#GAGGCCCAGCACTGCAGGGTTGGGCC#.(((((.((((.(((((((((((#)))))))))))..)))).))..))).	1558	1584	1	-23.4	0	3.55006e-06	0.426	0	0	-8.68381	20	26	11	3UTR		0	0
hsa-miR-221-3p	NM_052950	WDFY2	AGCTACATTGTCTGCTGGGTTTC#GAGGCATGCCAGGGTGCCACTAACCCAGCAGGTGTGGCA#.(((((((...((((((((((..#.))))))))))))))))).	5963	6002	1	-27.4	1	6.07611e-05	0.397	0	0	-8.917	17	19	17	3UTR		0	0
hsa-miR-221-3p	NM_052964	CLNK	AGCTACATTGTCTGCTGGGTTTC#GGATTATCTCTTTTGTAAGACAGCAGACAATGAGCTC#((((.((((((((((((..((..#.))..)))))))))))))))).	3090	3127	1	-25.5	0	0.00901118	0.559	0	0	-8.05661	18	22	16	3UTR		0	0
hsa-miR-221-3p	NM_053016	PALM2AKAP2	AGCTACATTGTCTGCTGGGTTTC#AATCCCAGCACTTTGGGGGGCCAAGGCAGGAGGATAGTGTGAGCC#.(((((((((((((((.((((((#.))))))..))))....)))))))).))).	8130	8175	1	-20.9	1	0.00823369	0.441	0	0	-3.79332	21	30	8	3UTR		0	1
hsa-miR-221-3p	NM_053024	PFN2	AGCTACATTGTCTGCTGGGTTTC#GGGCCTTGTGGATAATGTAC#...((((((((((((.((((((.#)))))).)))))))))))).	1862	1882	1	-20.2	0	0.00571092	0.676	0	0	-6.74759	18	20	12	3UTR		0	0
hsa-miR-221-3p	NM_053043	RBM33	AGCTACATTGTCTGCTGGGTTTC#CCCAGATAAGGCAATGTGCTG#(((.(((((((((.(((((....#)))))...)))))))))))).	4405	4426	1	-22.8	0	3.15741e-05	0.485	0	0	-7.82644	17	21	12	3UTR	MIRT046841	0	0
hsa-miR-221-3p	NM_053064	GNG2	AGCTACATTGTCTGCTGGGTTTC#CCCACATGGACAATGTATGTG#.(((((((((((((.((((....#))))..))))))))))).)).	3525	3546	1	-18.4	1	0.000222749	0.682	-0.494142	-0.157388	-4.52877	17	21	11	3UTR		0	0
hsa-miR-221-3p	NM_053285	TEKT1	AGCTACATTGTCTGCTGGGTTTC#CAGCTGACGGTGTGGG#..((((((((((.((((......#)))).)))))))))).	2438	2454	1	-21.1	1	1.11583e-05	0.426	0	0	-6.24613	14	16	10	3UTR		0	0
hsa-miR-221-3p	NM_054014	FKBP1A	AGCTACATTGTCTGCTGGGTTTC#GCCCAGCGTTTGATGGGTAGCA#.(((((.(((((((((((((...#))))))))...)))))))))).	474	496	1	-22.7	0	0.000297274	0.529	0	0	-5.33701	18	22	10	3UTR		0	0
hsa-miR-221-3p	NM_054110	GALNT15	AGCTACATTGTCTGCTGGGTTTC#AACCCAGCAGCTGAAAAGCTT#((((.....(.((((((((((..#))))))))))).....)))).	2991	3012	1	-21.2	0	0.000247957	0.544	0	0	-17.6961	15	21	11	3UTR		0	0
hsa-miR-221-3p	NM_057175	NAA15	AGCTACATTGTCTGCTGGGTTTC#AAACCTCAGCAGGCCTTGTT#....(((..(((((((((((((.#))))).))))))))..))).	3802	3822	1	-21.4	0	0.0226297	0.618	0	0	-12.9166	16	20	8	3UTR		0	0
hsa-miR-221-3p	NM_058222	TECTB	AGCTACATTGTCTGCTGGGTTTC#GACATGGGAGATGATGTGGG#..(((((((((((.((..(((..#)))..)).))))))))))).	1681	1701	1	-18.3	1	0.000968963	0.603	0.408318	0.149335	-5.81384	16	20	11	3UTR		0	0
hsa-miR-221-3p	NM_078483	SLC36A1	AGCTACATTGTCTGCTGGGTTTC#GCCTAGCAGTTGTCACCATTCACAAGTGGCA#.(((((.(((((((((((((...#)))))))))............))))))))).	4626	4657	1	-22.2	0	7.53029e-05	0.515	0	0	-5.33701	18	31	9	3UTR		0	0
hsa-miR-221-3p	NM_078628	MSL3	AGCTACATTGTCTGCTGGGTTTC#GAGGCCCAGAGTCTAAGACTGCAGTGAGCTC#((((.((((((((.(((((((((#))))))))))).........)))))))))).	3027	3058	1	-22.6	0	0.00052144	0.397	0	0	-8.91345	21	31	11	3UTR		0	0
hsa-miR-221-3p	NM_080387	CLEC4D	AGCTACATTGTCTGCTGGGTTTC#GAGACAACATGTGTGTATGTGTGTGTGTGTGTGTGTAGATAATGTGGTTT#(((((((((((((((........#.))))))))))))))).	1030	1080	1	-19.6	1	0.0899161	0.632	0	0	-4.17062	15	17	15	3UTR		0	0
hsa-miR-221-3p	NM_080538	COLQ	AGCTACATTGTCTGCTGGGTTTC#GACCCCTCGACTGGCCACAGCCCAGCCCAGCCTGACGTGGATGTGGCTG#((((((((((((.((((((((..#.))))))))..)))...))))))))).	2169	2218	1	-28.2	1	0.000571962	0.441	4.62092	3.75446	-5.22671	20	27	9	3UTR		0	0
hsa-miR-221-3p	NM_080599	UPF2	AGCTACATTGTCTGCTGGGTTTC#TCCAGCAGGCGTAGTA#.(((((...((((((((((....#))))))))))))))).	5134	5150	1	-22	0	0.00621316	0.515	0	0	-8.70704	15	16	15	3UTR		0	0
hsa-miR-221-3p	NM_080621	SAMD10	AGCTACATTGTCTGCTGGGTTTC#AAGCGCCAGAGACAAAATGTGGCA#.((((((((((((.((((((((.#)))).)))))))))..))))))).	1446	1470	1	-23.5	1	0.00768595	0.426	0.0319063	0.852069	-4.65016	20	24	9	3UTR		0	0
hsa-miR-221-3p	NM_080666	WDR89	AGCTACATTGTCTGCTGGGTTTC#ACCCATGGTAGACATGTTTAAAGCTT#(((((((.((((((((((((...#)))))..))))))))))....)))).	1430	1456	1	-19.6	1	0.00356989	0.647	0	0	-6.25121	19	26	10	3UTR		0	0
hsa-miR-221-3p	NM_080669	SLC46A1	AGCTACATTGTCTGCTGGGTTTC#GAACCCAGTGGAGGAGGGGGCA#.(((...((.((((((((((((.#)))))))))))).))...))).	3379	3401	1	-24.8	0	0.000875977	0.456	0	0	-12.5995	17	22	12	3UTR		0	0
hsa-miR-221-3p	NM_080670	SLC35A4	AGCTACATTGTCTGCTGGGTTTC#GACTCATCTCAGGGAATGTAGCC#.((((((((.((((.((((((..#))))))...)))).)))))))).	2353	2376	1	-22.2	1	8.8468e-05	0.397	-0.167908	0.00446736	-5.77128	18	23	8	3UTR		0	0
hsa-miR-221-3p	NM_080676	MACROD2	AGCTACATTGTCTGCTGGGTTTC#GAGCCCAGCAGCAGTA#......((((.(((((((((((.#))))))))))))))).	1966	1982	1	-22.3	0	0.0265159	0.544	4.78689	5.53105	-18.3913	15	16	15	3UTR		0	0
hsa-miR-221-3p	NM_080677	DYNLL2	AGCTACATTGTCTGCTGGGTTTC#GCCCTCCCAGACTGTGTGGCC#.(((((((.(((((..((((...#))))...))))).))))))).	2345	2366	1	-23.2	1	0.000196413	0.5	0	0	-5.81821	16	21	7	3UTR		0	0
hsa-miR-221-3p	NM_080725	SRXN1	AGCTACATTGTCTGCTGGGTTTC#TCCAGCAGGCTAGCTC#(((((....((((((((((....#))))))))))))))).	1561	1577	1	-21	0	0.000538669	0.485	0	0	-10.7522	15	16	15	3UTR		0	0
hsa-miR-221-3p	NM_080751	TMC2	AGCTACATTGTCTGCTGGGTTTC#AAGACCAGCCCGGGCAATGTGGCG#.(((((((((((((((((..((.#))..)))))..)))))))))))).	3308	3332	1	-26.4	1	0.000172786	0.485	0	0	-3.79332	19	24	12	3UTR		0	0
hsa-miR-221-3p	NM_080820	DTD1	AGCTACATTGTCTGCTGGGTTTC#AGGCCTCAGCATGGCGGGTGGTG#.(((((.(((((((((((((((.#))))).))))).)))))))))).	1536	1559	1	-21.9	0	6.74827e-05	0.441	0.805831	1.24416	-5.33701	20	23	10	3UTR		0	0
hsa-miR-221-3p	NM_080836	STK35	AGCTACATTGTCTGCTGGGTTTC#CCCAGACAGACGTAGCTC#((((((...((((((((((....#))))).))))))))))).	5668	5686	1	-23.2	0	0.000127779	0.353	0	0	-8.85129	16	18	11	3UTR		0	0
hsa-miR-221-3p	NM_080873	ASB11	AGCTACATTGTCTGCTGGGTTTC#GGAGCCAGCAACAAAGAATTATCAGATCTGGCCGGGCATGGTGGCTC#((((((..((((((((((((((.#.))))))))).)))))..)))))).	2487	2534	1	-24.3	0	2.5839e-05	0.471	0	0	-7.7949	20	25	9	3UTR		0	0
hsa-miR-221-3p	NM_130434	DPP8	AGCTACATTGTCTGCTGGGTTTC#ATTCCCAGGCTAGGCATGGTGGCTC#((((((..(((((((((((....#.))))).).)))))..)))))).	5522	5547	1	-23.9	0	3.67921e-05	0.5	0	0	-7.7949	17	23	6	3UTR		1	1
hsa-miR-221-3p	NM_130440	PTPRF	AGCTACATTGTCTGCTGGGTTTC#GAACATCCCTGGGCAAGTGGATGGCCCAGCAGGCAGGCACTGTGGCC#.((((((((((((((((((((..#.))))))))))))))....)))))).	6204	6251	1	-31.2	1	1.75775e-06	0.324	0	0	-3.79332	20	26	14	3UTR	MIRT046964	0	0
hsa-miR-221-3p	NM_130465	TSPAN17	AGCTACATTGTCTGCTGGGTTTC#GCCCAGCAATGTGGCTC#((((((((....((((((((...#)))))))))))))))).	2370	2387	1	-23.3	1	1.58043e-06	0.309	0	0	-12.408	16	17	16	3UTR		0	0
hsa-miR-221-3p	NM_130466	UBE3B	AGCTACATTGTCTGCTGGGTTTC#GGGACCTTCAGCTCCCAGAGGCAGTGTGGTC#.((((((((((((.(((((....#.))))))))))))))))).	3850	3881	1	-26.3	1	7.86762e-07	0.382	0	0	-4.65016	17	19	17	3UTR		0	0
hsa-miR-221-3p	NM_130766	INPP5K	AGCTACATTGTCTGCTGGGTTTC#AAGCCTGTGTATGAAGAATTGTCCCCTGGCTTCCAGCAGGCCATGGCTGGCTG#((((((((.((((((((((....#.)))))))))).)))..))))).	2836	2889	1	-24.1	1	8.60328e-07	0.471	0	0	-4.99396	18	23	10	3UTR		0	0
hsa-miR-221-3p	NM_130787	AP2A1	AGCTACATTGTCTGCTGGGTTTC#GGACTCTGCCCCGGGGGATGTGGCC#.((((((((.((((..((((...#.)))))))).)))))))).	3006	3031	1	-22.1	1	2.43292e-07	0.309	-0.502032	-0.132167	-6.00433	16	19	8	3UTR	MIRT046880	0	0
hsa-miR-221-3p	NM_130809	PRRC1	AGCTACATTGTCTGCTGGGTTTC#GAATCCAGTAGTTTTTATCATTTTCCTGTAGCC#.((((((....(((((((((((.#)))))))))))...............)))))).	1587	1620	1	-19.5	1	0.050632	0.662	0	0	-11.2306	17	33	11	3UTR		0	0
hsa-miR-221-3p	NM_130831	OPA1	AGCTACATTGTCTGCTGGGTTTC#CCCAGCCTCACAATGTGGG#..(((((((((..((((((....#))))))...))))))))).	5435	5454	1	-22.5	1	0.000340037	0.515	0	0	-9.59293	15	19	9	3UTR		0	0
hsa-miR-221-3p	NM_133259	LRPPRC	AGCTACATTGTCTGCTGGGTTTC#GAGTCTTGGCCCAGTGGACATAGTGCGGCTT#((((.((((((((((((((((..#.)))))))))))))..))).)))).	5572	5603	1	-26.4	0	0.00131426	0.412	0	0	-8.05661	20	25	13	3UTR		0	0
hsa-miR-221-3p	NM_133261	GIPC3	AGCTACATTGTCTGCTGGGTTTC#GGGGCCCCCAGAAGCAGCAAGTGACCTTATTTCTCCAGCAGGCGGTGGTAGG#..(((((((((((((((((....#.)))))))))))))).))).	4217	4269	1	-25.4	1	7.48902e-06	0.426	0	0	-4.957	17	20	14	3UTR		0	0
hsa-miR-221-3p	NM_133334	NSD2	AGCTACATTGTCTGCTGGGTTTC#ATTCCCGGCAGATTCTTTGGCTG#(((((....((((((((((....#.))))))))))....))))).	2832	2855	1	-23.8	0	0.000683022	0.588	0.186879	0.0688805	-10.7522	15	21	10	3UTR		0	0
hsa-miR-221-3p	NM_133374	ZNF618	AGCTACATTGTCTGCTGGGTTTC#GAAACATCAGCAGACTTTATGATGTCAGTTG#(((((((((((((((((((((((#))))).))))))))).....))))).)))).	4989	5020	1	-23.6	1	0.00212234	0.515	4.06418	2.50989	-3.93757	23	31	9	3UTR		1	0
hsa-miR-221-3p	NM_133466	ZFP82	AGCTACATTGTCTGCTGGGTTTC#GCCCAGTAGAATATGGTAGA#..((((..((((((((((((...#)))))))))).))..)))).	2224	2244	1	-22.3	0	0.000265991	0.5	0	0	-8.81432	16	20	10	3UTR		0	0
hsa-miR-221-3p	NM_133478	SLC4A5	AGCTACATTGTCTGCTGGGTTTC#GAACCCAGGAGGCAGAAGTTGCAGTGAGCTG#((((.((((((((.((((((((.#)))))))).))))).........))))))).	4696	4727	1	-24.4	0	0.000312959	0.426	0	0	-8.91345	20	31	8	3UTR		0	0
hsa-miR-221-3p	NM_133496	SLC30A7	AGCTACATTGTCTGCTGGGTTTC#TCCGCAGGCAAAGTGGCA#.(((((.((((((((.(((....#))))))))))).))))).	3286	3304	1	-23	0	4.01466e-05	0.588	0.271704	0.121608	-5.57006	16	18	11	3UTR	MIRT046965	0	0
hsa-miR-221-3p	NM_133507	DCN	AGCTACATTGTCTGCTGGGTTTC#GAAACCTAACTGCAATGTGGA#..(((((((((..(.((((((((#)))))))).).))))))))).	582	603	1	-20.6	1	0.00845268	0.662	-0.214509	-0.290471	-10.3284	18	21	9	3UTR		0	0
hsa-miR-221-3p	NM_133510	RAD51B	AGCTACATTGTCTGCTGGGTTTC#AGACCTAGCAGGGAAGGTGA#...(((.((.((((((((((((.#)))))))))))).)).))).	1297	1317	1	-21.3	0	0.000507608	0.529	0	0	-9.30073	17	20	12	3UTR		0	0
hsa-miR-221-3p	NM_133645	MTO1	AGCTACATTGTCTGCTGGGTTTC#GAACCCAGGAGGCAGAGGTTGCA#.((.((.((((((.((((((((.#)))))))).))))))..)).)).	3899	3922	1	-24.9	0	2.04222e-05	0.426	0	0	-9.22587	18	23	8	3UTR		0	0
hsa-miR-221-3p	NM_133646	MAP3K20	AGCTACATTGTCTGCTGGGTTTC#GAGACCTAGCAATCAGTCAGGGCTG#((((..((((..(((((((((((#)))))))))))..))))...)))).	2149	2174	1	-23.8	0	3.64509e-06	0.441	2.24299	2.4139	-16.1291	19	25	11	3UTR		0	0
hsa-miR-221-3p	NM_134431	SLCO1A2	AGCTACATTGTCTGCTGGGTTTC#GATTCAAGGCAGATAGTGTTGGTG#.(((((((((((((((..(..((#))..)..)))))))))))).))).	4843	4867	1	-21.2	1	0.000163983	0.574	0	0	-3.79332	18	24	12	3UTR		0	0
hsa-miR-221-3p	NM_138288	SPTSSA	AGCTACATTGTCTGCTGGGTTTC#GAACTCAGGAGTACAGTTTTAGCTA#(((((.(((((((.((((((((.#)))))))).)).)))))..))))).	778	803	1	-21.5	0	0.000280089	0.662	0.055603	-0.0452429	-6.69537	20	25	8	3UTR	MIRT024140	1	0
hsa-miR-221-3p	NM_138317	KCNK10	AGCTACATTGTCTGCTGGGTTTC#GGGACCCAGTGACAATGA#.....(((((((.((((((((((#))))))))))))))))).	7261	7279	1	-24.2	0	0.0115507	0.515	0	0	-14.9547	17	18	17	3UTR		0	0
hsa-miR-221-3p	NM_138323	PCSK6	AGCTACATTGTCTGCTGGGTTTC#GAGGCTCAGCACTTTGGACATGGCTC#(((((...(((((((((((((((#))))))))))).....))))))))).	2053	2079	1	-21.4	0	0.00442342	0.471	3.68303	3.17371	-9.69585	20	26	11	3UTR		0	0
hsa-miR-221-3p	NM_138331	RNASE8	AGCTACATTGTCTGCTGGGTTTC#GCCCACGTTCCACCTCACACTCTGCAGACTGTATGCTG#(((((((..((((((.((((...#.)))).)))))))))).))).	544	582	1	-19.9	1	0.000473692	0.485	-0.228315	0.2128	-7.54065	17	21	10	3UTR		0	0
hsa-miR-221-3p	NM_138338	POLR3H	AGCTACATTGTCTGCTGGGTTTC#GGGGCCAGCAGCTGAGATGTGGTC#.((((((((..(((((((.(((.#))).)))))))....)))))))).	3654	3678	1	-22.6	1	0.000985105	0.426	0	0	-7.86061	18	24	8	3UTR		0	0
hsa-miR-221-3p	NM_138346	KIAA2013	AGCTACATTGTCTGCTGGGTTTC#GGAGCCTGTGGACATCTGTGGTTT#(((((((.(((((((.(((((((#))))))))))))))..))))))).	2680	2704	1	-22.9	1	0.00121517	0.485	0	0	-6.48426	21	24	14	3UTR		0	0
hsa-miR-221-3p	NM_138390	TMEM169	AGCTACATTGTCTGCTGGGTTTC#GGAAGCTGGACTACCACAGTGTAGCA#.((((((((((..(((((.((((#)))).)))).)....)))))))))).	1484	1510	1	-20.1	1	0.000508595	0.603	0	0	-8.42926	19	26	10	3UTR		0	0
hsa-miR-221-3p	NM_138391	TMEM183A	AGCTACATTGTCTGCTGGGTTTC#AACCTAAGGACAATGAGCA#.(((.((((((((..((((((..#)))))).))))))))))).	2837	2856	1	-20.9	0	0.0384635	0.618	0.16862	-0.021259	-9.50465	17	19	11	3UTR	MIRT046913	0	0
hsa-miR-221-3p	NM_138409	MRAP2	AGCTACATTGTCTGCTGGGTTTC#CTAGCAGATATTCAGGGTGGCC#.(((((..((((((((((.....#))))))))))......))))).	1919	1941	1	-20.5	0	0.00242703	0.544	0	0	-7.65065	15	22	10	3UTR		0	1
hsa-miR-221-3p	NM_138424	KIF12	AGCTACATTGTCTGCTGGGTTTC#GGAACCCAGGAGACTGCTGTGTGA#...(((((.((((.(((((((((#))))))))).))))....))))).	1799	1823	1	-23.4	0	0.000695019	0.426	0	0	-8.42777	18	24	9	3UTR		0	0
hsa-miR-221-3p	NM_138450	ARL11	AGCTACATTGTCTGCTGGGTTTC#AGCCAGCAGACATGATGGG#..(((((.((((((((((.(...#).)))))))))))).))).	2913	2932	1	-21	0	0.0024955	0.529	0	0	-7.27064	16	19	12	3UTR		0	0
hsa-miR-221-3p	NM_138458	DNAAF10	AGCTACATTGTCTGCTGGGTTTC#GAATCACTTGAACCCAGGAGGTGGAGATTGCAGTGAGCTG#((((.((((((((.((((((((.#.)))))))).)).........)))))))))).	2157	2197	1	-24.4	0	0.000105928	0.426	3.15727	5.57753	-8.91345	20	32	10	3UTR		0	0
hsa-miR-221-3p	NM_138467	TYW3	AGCTACATTGTCTGCTGGGTTTC#CCTAGATGACAATGTCAGTGGCA#.(((((((((((..(((((....#)))))..))))))))....))).	2189	2212	1	-19	1	0.00152977	0.515	0	0	-5.9393	16	23	8	3UTR		0	0
hsa-miR-221-3p	NM_138473	SP1	AGCTACATTGTCTGCTGGGTTTC#CCCAGCAGTAGTGAGCC#.(((.(((((.((((((((....#)))))))))))))))).	5247	5264	1	-23.8	0	0.00703133	0.5	0	0	-10.7371	16	17	16	3UTR		0	0
hsa-miR-221-3p	NM_138573	NRG4	AGCTACATTGTCTGCTGGGTTTC#AAACTGAGCAGATAGTATAGA#..(((.((((((((((.(((((.#))))).)))))))))).))).	1677	1698	1	-21.6	0	0.00094637	0.544	0.353754	-0.0686612	-6.85796	18	21	10	3UTR		0	0
hsa-miR-221-3p	NM_138576	BCL11B	AGCTACATTGTCTGCTGGGTTTC#AAACCCAGCACAACCTTGGACATCCATTAGCTG#(((((...((((((((((((((.#))))))))))........)))).....))))).	5471	5504	1	-22.1	0	4.13529e-05	0.574	0	0	-9.69585	19	33	10	3UTR		1	0
hsa-miR-221-3p	NM_138621	BCL2L11	AGCTACATTGTCTGCTGGGTTTC#GGACCCAGCGTATGTAGCA#.(((((((....((((((((((.#)))))))))).))))))).	4925	4944	1	-23.6	1	0.0103491	0.559	0	0	-12.2638	17	19	10	3UTR	MIRT000140	1	1
hsa-miR-221-3p	NM_138637	STEAP3	AGCTACATTGTCTGCTGGGTTTC#AACCTGGTAGACAGTATAAAAGCA#.(((..(((((((((((((((..#))))))))))))))).....))).	4023	4047	1	-21.8	0	0.00214203	0.676	0	0	-9.81332	18	24	15	3UTR		0	0
hsa-miR-221-3p	NM_138693	KLF14	AGCTACATTGTCTGCTGGGTTTC#GAGGCCACATAAGCTCCATGTAGATGTGTGGCTG#(((((((.((((((((((((((.#.)))).))).)))))))))))))).	1746	1780	1	-22.9	1	0.000919751	0.5	0	0	-6.25121	21	25	14	3UTR		0	0
hsa-miR-221-3p	NM_138704	NSMCE3	AGCTACATTGTCTGCTGGGTTTC#GAACCCAGGGAGCATATTGCTGTAAACGCTTCAATGTGTGTAGCTT#(((((((((((.(.((((((((.#)))))))).).))).......................)))))))).	1111	1157	1	-22.2	1	0.0106443	0.632	1.23254	1.1337	-8.14122	20	46	8	3UTR		0	0
hsa-miR-221-3p	NM_138715	MSR1	AGCTACATTGTCTGCTGGGTTTC#CCCAGGGCCATAGTGTAGA#..(((((((((.(.(((((....#))))).)..))))))))).	2416	2435	1	-18.4	1	0.000366416	0.515	3.82061	2.35027	-9.16064	15	19	9	3UTR		0	0
hsa-miR-221-3p	NM_138729	ST7L	AGCTACATTGTCTGCTGGGTTTC#AACCCAGCTGAACAATGG#.....(((((((.((((((((..#)))))))).)).))))).	1731	1749	1	-21	0	0.00106892	0.618	0.223905	0.148642	-14.9547	15	18	8	3UTR		0	0
hsa-miR-221-3p	NM_138786	TM4SF18	AGCTACATTGTCTGCTGGGTTTC#GGACCCAGCACACAGTGAAGCC#.(((.((((((.((((((((((.#)))))))))).)))))).))).	1913	1935	1	-27.6	0	0.00853086	0.5	0	0	-11.2592	19	22	10	3UTR		0	0
hsa-miR-221-3p	NM_138809	CMBL	AGCTACATTGTCTGCTGGGTTTC#CCTGGCACATGACCTTGTGGCTC#(((((((..((((((((((....#)))))))...)))..))))))).	2655	2678	1	-21.6	1	0.00134239	0.529	0.938891	0.364879	-7.3076	17	23	7	3UTR		0	0
hsa-miR-221-3p	NM_138959	VANGL1	AGCTACATTGTCTGCTGGGTTTC#AGCTCAGCAGATACGTGTCATTGTGTATATAGCTG#(((((((((((((((((((((..#))))))))))))).))))............)))).	5304	5339	1	-23	1	0.00528561	0.529	0	0	-3.93757	21	35	13	3UTR	MIRT533274	0	0
hsa-miR-221-3p	NM_139003	HFE	AGCTACATTGTCTGCTGGGTTTC#GAACCCAGGAGGCAGAGCTT#((((...((((((.((((((((.#)))))))).)))))))))).	1922	1942	1	-23.9	0	0.00128428	0.412	0	0	-12.3581	18	20	10	3UTR		0	0
hsa-miR-221-3p	NM_139015	SPPL3	AGCTACATTGTCTGCTGGGTTTC#GGAGCCCTTACTTGGTTTTGATCAGTGTAGCA#.(((((((((((.((((((((((#)))))))......)))...)).))))))))).	2544	2576	1	-22.6	1	0.0336503	0.588	0	0	-5.08246	21	32	9	3UTR		1	1
hsa-miR-221-3p	NM_139017	IL31RA	AGCTACATTGTCTGCTGGGTTTC#GGGACTCAGTAGGCCCTTAGCA#.((((....((((((((((((((#))))))))))))))...)))).	7238	7260	1	-23.7	0	0.0065995	0.5	0	0	-10.608	18	22	14	3UTR		0	0
hsa-miR-221-3p	NM_139055	ADAMTS15	AGCTACATTGTCTGCTGGGTTTC#GGAACCCAGCCGTATCCCTCCCCTAGGACAGTGG#.....((((((((((((((((((#))))))))))...............)))))))).	4388	4422	1	-24.6	0	9.20472e-05	0.397	0	0	-13.6656	18	34	10	3UTR		0	0
hsa-miR-221-3p	NM_139057	ADAMTS17	AGCTACATTGTCTGCTGGGTTTC#AGCCCCAGACTTTGTGGTA#.((((((..(((((..(((((..#))))))))))..)))))).	4506	4525	1	-21.5	1	0.00259251	0.456	0.065546	-0.13348	-8.13185	16	19	10	3UTR		0	0
hsa-miR-221-3p	NM_139069	MAPK9	AGCTACATTGTCTGCTGGGTTTC#GGAGCCCGTGACGGTGTGGA#..((((((((((.((.(((((((#))))))))))))))))))).	3506	3526	1	-23.7	1	0.00131726	0.397	0	0	-6.47918	19	20	19	3UTR		0	0
hsa-miR-221-3p	NM_139072	DNER	AGCTACATTGTCTGCTGGGTTTC#GAAACCTATAGACGATGTTTTAATGTACCTTCAGCTC#((((((((((((((.((((((((#))))))))))))))))))..............)))).	2525	2562	1	-23	1	0.0870856	0.603	0	0	-4.67302	22	37	18	3UTR		0	0
hsa-miR-221-3p	NM_139135	ARID1A	AGCTACATTGTCTGCTGGGTTTC#GAGGCCTGTGCAGTAGAGTGTAGA#..(((((((.(((((((((((((#)))))))).)))).).))))))).	7141	7165	1	-23.2	1	0.000360166	0.5	0	0	-6.19951	20	24	8	3UTR	MIRT024162	1	1
hsa-miR-221-3p	NM_139179	DAGLB	AGCTACATTGTCTGCTGGGTTTC#GAGACCCAGCGACCGTGGAGA#..((.(((.(((.((((((((((#))))))))))))).))).)).	2356	2377	1	-24.3	0	0.001776	0.338	0	0	-11.4216	18	21	13	3UTR		0	0
hsa-miR-221-3p	NM_139202	MLC1	AGCTACATTGTCTGCTGGGTTTC#GCCCAGCTTGGAGTGCCACGTGGCCGCTGCTGTGACAGGCAGTGTTCTTGGGGGTGGGGCTG#((((((((((((((((((((...#))))))).............................)))))))))............)))).	2336	2398	1	-21.9	1	0.000555183	0.382	0	0	-3.93757	20	62	9	3UTR		0	0
hsa-miR-221-3p	NM_139235	NOL6	AGCTACATTGTCTGCTGGGTTTC#GGGACCCAGCGAAAATGTGGCC#.((((((((.((.((((((((((#)))))))))))).)))))))).	2635	2657	1	-28.5	1	5.29642e-05	0.456	0	0	-6.32496	20	22	12	3UTR		0	0
hsa-miR-221-3p	NM_139281	WDR36	AGCTACATTGTCTGCTGGGTTTC#GAAGCCAGGAATTTGAGCCCAGCCTGGGCAACATAGCA#.((((..(((((((((((((((.#.)))))))))..))))))..)))).	3034	3072	1	-26.3	0	0.000877034	0.544	0	0	-7.23797	19	25	9	3UTR		0	0
hsa-miR-221-3p	NM_144492	CLDN14	AGCTACATTGTCTGCTGGGTTTC#AAACCTTGCGGATGTGGCTG#(((((((...(((((.((((((.#)))))).)))))))))))).	1945	1965	1	-22	1	1.9233e-05	0.583	0	0	-8.78315	18	20	12	3UTR		0	0
hsa-miR-221-3p	NM_144579	SFXN5	AGCTACATTGTCTGCTGGGTTTC#AACCTAGGAGCAGTGGGCC#.(((.(((((.((.(((((((..#))))))).)))))))))).	2071	2090	1	-20.6	0	0.000631824	0.471	0	0	-11.594	17	19	10	3UTR		0	0
hsa-miR-221-3p	NM_144582	TEX261	AGCTACATTGTCTGCTGGGTTTC#CCCAGTAGACTGTAAGCTC#(((((((..((((((((((....#)))))))))))))).))).	3250	3269	1	-23.2	1	0.00225595	0.515	0	0	-7.3076	17	19	14	3UTR		0	0
hsa-miR-221-3p	NM_144588	ZFYVE27	AGCTACATTGTCTGCTGGGTTTC#CCCATCAGAGGGTGTGGCC#.((((((((.((((.((((....#)))).)))).)))))))).	1963	1982	1	-25	1	3.91083e-05	0.456	0	0	-5.77128	16	19	8	3UTR		0	0
hsa-miR-221-3p	NM_144593	RHEBL1	AGCTACATTGTCTGCTGGGTTTC#GGAGCCGGGGACTTCTGAAATAGAGCTGGCTCCCTGGGGTGACAATGTATATATGCA#.((((((((((((.(((((....#.))))).).))))))))).....)).	1088	1145	1	-18.5	1	0.0887289	0.642	0.664718	0.296203	-4.65016	17	26	9	3UTR		0	0
hsa-miR-221-3p	NM_144599	NIPA1	AGCTACATTGTCTGCTGGGTTTC#GAATACCGCAGGCAATTGTAACACAGTGGTG#.((((((((((((((.((..(((#)))..))))))))))).........))))).	1980	2011	1	-20.3	1	0.000817345	0.574	0	0	-4.02637	19	31	11	3UTR		0	1
hsa-miR-221-3p	NM_144618	GABPB2	AGCTACATTGTCTGCTGGGTTTC#GAACCCAGGAGGCAGAGCTTGCAGTGAGCTG#((((.((((((((.((((((((.#)))))))).))))).........))))))).	7035	7066	1	-24.4	0	3.33754e-05	0.412	0	0	-8.91345	20	31	8	3UTR		0	0
hsa-miR-221-3p	NM_144660	SAMD8	AGCTACATTGTCTGCTGGGTTTC#TCCAGCCCGGGCAAGGTAGCA#.(((((.((((((((((((....#))))))..)))))).))))).	3568	3589	1	-23.5	0	0.000583754	0.515	0	0	-5.33701	17	21	6	3UTR		0	0
hsa-miR-221-3p	NM_144773	PROKR2	AGCTACATTGTCTGCTGGGTTTC#ACCCAGCAGACTCACCTTCAGCC#.(((.....(((((((((((...#)))))))))))........))).	3691	3714	1	-22.5	0	0.214359	0.544	0	0	-14.727	14	23	11	3UTR		0	0
hsa-miR-221-3p	NM_144781	PDCD2	AGCTACATTGTCTGCTGGGTTTC#CAGCAGACCAATGAGTG#.(((.((((((((((((......#)))))))).))))))).	1253	1270	1	-19.2	0	0.00705112	0.559	0	0	-7.91236	15	17	8	3UTR		0	0
hsa-miR-221-3p	NM_144962	PEBP4	AGCTACATTGTCTGCTGGGTTTC#GCCCACCACCGACGATGTGGGTA#(.((((((((((((.(((((...#))))).))..)))))))))).).	818	841	1	-21.7	1	0.000114521	0.397	0	0	-5.8367	18	23	10	3UTR		0	0
hsa-miR-221-3p	NM_144968	RIBC1	AGCTACATTGTCTGCTGGGTTTC#AGACCCCAACCTCCCTGACTTCCTTCAGTAACTGACAGTGTAGCA#.((((((((((((((((((....#.)))))))...))))))))))).	906	951	1	-23.5	1	0.00631922	0.574	3.22995	2.38062	-3.79332	18	23	11	3UTR		0	0
hsa-miR-221-3p	NM_144970	CXorf38	AGCTACATTGTCTGCTGGGTTTC#GAGGGCTTTAAGGCAATGTAGCA#.((((((((((((...((.((((#)))).))...)))))))))))).	3420	3443	1	-23.9	1	0.00313216	0.618	0	0	-5.61866	18	23	12	3UTR	MIRT024161	0	0
hsa-miR-221-3p	NM_145001	STK32A	AGCTACATTGTCTGCTGGGTTTC#GAGACCGAAGCCCAGGCACATGTATTTTGCA#.((((((((((...(((((((((#.)))))))))))).)))))....)).	784	815	1	-18.9	1	0.0252541	0.574	0.0443843	0.0430267	-9.2861	19	26	12	3UTR		0	0
hsa-miR-221-3p	NM_145019	FAM124A	AGCTACATTGTCTGCTGGGTTTC#GGAGCCCAGCAACCTTGGCTT#(((((....((.(((((((((((#)))))))))))))..))))).	2986	3007	1	-21.7	0	2.03539e-05	0.5	0	0	-14.099	18	21	13	3UTR		0	0
hsa-miR-221-3p	NM_145025	AK9	AGCTACATTGTCTGCTGGGTTTC#GGGATTGGAATGTGGAGGAATTCTAGAAGGGGCAATGTGGCTT#(((((((((((((.(((((.(((#.))).)))))...))))))))))))).	1877	1920	1	-24.4	1	0.00162567	0.529	0.332998	0.181512	-4.79441	21	27	13	3UTR		0	0
hsa-miR-221-3p	NM_145043	NEIL2	AGCTACATTGTCTGCTGGGTTTC#AGCTTTGCAGATGATGTGGG#..(((((((((((((.(((((..#))))).))))))))))))).	1962	1982	1	-22.4	1	0.0108174	0.647	0	0	-5.19005	18	20	13	3UTR		0	0
hsa-miR-221-3p	NM_145063	OARD1	AGCTACATTGTCTGCTGGGTTTC#GGGACTTAGCAGGAATGTGATAAAGCA#.((((((((.(((((((((((((#)))))))))))))))))).....))).	2732	2759	1	-22	1	0.00336538	0.574	0	0	-5.03583	21	27	18	3UTR		0	0
hsa-miR-221-3p	NM_145168	SDR42E1	AGCTACATTGTCTGCTGGGTTTC#ACCTGTCAGCCAGTGTAGCC#.(((((((((.(((.(((((...#))))).))).))))))))).	3863	3883	1	-21.5	1	0.0136317	0.485	0.531984	-0.0198545	-7.35355	17	20	9	3UTR		0	0
hsa-miR-221-3p	NM_145174	DNAJB7	AGCTACATTGTCTGCTGGGTTTC#GAGGCCCAGGCAGGAGGGTTGAAGTC#.(((.((...(((((((((((((#))))))))).)))).....)).))).	1778	1804	1	-20.2	0	0.011863	0.471	0	0	-12.5249	18	26	9	3UTR		0	0
hsa-miR-221-3p	NM_145204	SENP8	AGCTACATTGTCTGCTGGGTTTC#ACTCAGCAGGCTGAGGCA#.(((.((..(((((((((((...#))))))))))))).))).	3572	3590	1	-21.3	0	2.6311e-05	0.397	0	0	-11.2824	16	18	13	3UTR		0	0
hsa-miR-221-3p	NM_145206	VTI1A	AGCTACATTGTCTGCTGGGTTTC#AGCAGATAGTGAAGTA#.(((.(((((((((((.......#))))))))))).))).	3173	3189	1	-18.6	0	0.0253724	0.574	0	0	-7.91236	14	16	11	3UTR		1	0
hsa-miR-221-3p	NM_145207	SPATA5	AGCTACATTGTCTGCTGGGTTTC#GAATCCAGCCTGGTCAATGTAGCG#.(((((((((.(((((((((((.#)))))))))..)).))))))))).	7405	7429	1	-27.5	1	0.00952144	0.647	0	0	-6.6181	20	24	9	3UTR		0	0
hsa-miR-221-3p	NM_145241	WDR31	AGCTACATTGTCTGCTGGGTTTC#CTCAGGGACAGTCGTAGCA#.((((((((((((.(((((....#)))))))))))).))))).	4642	4661	1	-21.6	1	0.012081	0.471	0	0	-4.65016	17	19	12	3UTR		0	0
hsa-miR-221-3p	NM_145279	MOB3C	AGCTACATTGTCTGCTGGGTTTC#GGAACTTTGGAGTCTTGTCTCCCATCCCAGCACATTGAGGATGTAGTTG#(((((((((.(((((((((....#.)))))))....)).))))))))).	1876	1925	1	-25.3	1	0.00103894	0.5	-0.353483	0.0924759	-5.18008	18	25	9	3UTR		0	0
hsa-miR-221-3p	NM_145307	RTKN2	AGCTACATTGTCTGCTGGGTTTC#GCTCCTCTAGACTAGACTGATTGAAGTAGACAGTGTGGTG#.(((((((((((((((.......#.))))))))))))))).	6001	6041	1	-22.8	1	0.0171041	0.603	0	0	-3.79332	15	17	15	3UTR		0	0
hsa-miR-221-3p	NM_145341	PDCD4	AGCTACATTGTCTGCTGGGTTTC#TAGCCAGGCATGGTGGCG#.(((((..(((((((((......#)))).)))))..))))).	3207	3225	1	-19.3	0	4.30356e-06	0.529	4.00428	4.51002	-7.65065	14	18	5	3UTR		0	0
hsa-miR-221-3p	NM_145638	OSBPL5	AGCTACATTGTCTGCTGGGTTTC#CCCAGCAGCAGTGAGTG#.(((.(((((.((((((((....#)))))))))))))))).	2915	2932	1	-23.9	0	0.000229563	0.309	0	0	-10.7371	16	17	16	3UTR		0	0
hsa-miR-221-3p	NM_145650	MUC15	AGCTACATTGTCTGCTGGGTTTC#GAGACCAGTAGCAGAAATGTAGA#..(((((((.(((((((((((((#))))))..)))))))))))))).	1394	1417	1	-23.6	1	0.037696	0.618	0	0	-6.19951	20	23	14	3UTR		0	0
hsa-miR-221-3p	NM_145663	DBF4B	AGCTACATTGTCTGCTGGGTTTC#AGACCCAGTGGGCATTGC#.....((.((((((((((((((.#)))))))))))))).)).	2155	2173	1	-22.8	0	4.38585e-05	0.5	0	0	-15.9792	16	18	14	3UTR		0	0
hsa-miR-221-3p	NM_145690	YWHAZ	AGCTACATTGTCTGCTGGGTTTC#GCCCAGTAGAGATGTGA#...((((((.((((((((((...#)))))))))))))))).	3465	3482	1	-21.8	0	0.0229423	0.603	0.00841812	-0.218256	-7.75705	16	17	16	3UTR		0	0
hsa-miR-221-3p	NM_145699	APOBEC3A	AGCTACATTGTCTGCTGGGTTTC#GAACCCGGGAGGCAGAGCTT#((((...((((((.((((((((.#)))))))).)))))))))).	1050	1070	1	-23.2	0	0.000602311	0.382	0	0	-12.3581	18	20	10	3UTR		0	0
hsa-miR-221-3p	NM_145716	SSBP3	AGCTACATTGTCTGCTGGGTTTC#GAACCCAGCACCCTCATCCTGTGGCC#.((((((.((..((((((((((.#))))))))))....))...)))))).	2321	2347	1	-23.1	1	0.00167259	0.338	1.5877	1.39665	-12.2785	18	26	10	3UTR		0	0
hsa-miR-221-3p	NM_145793	GFRA1	AGCTACATTGTCTGCTGGGTTTC#GAGACCGGGTGACTGTGGCA#.((((((..(((.(((.((((((#)))))).)))))))))))).	7837	7857	1	-22.9	1	4.3926e-05	0.412	0	0	-8.45248	18	20	12	3UTR		0	0
hsa-miR-221-3p	NM_145796	POGZ	AGCTACATTGTCTGCTGGGTTTC#GAAATCCAGCGTGCTCTGTGGCTT#(((((((..((.(((((((((((#))))))))))).))..))))))).	5362	5386	1	-27.4	1	0.00164323	0.559	0.56197	1.33824	-10.6544	20	24	11	3UTR	MIRT024203	1	1
hsa-miR-221-3p	NM_145799	SEPTIN6	AGCTACATTGTCTGCTGGGTTTC#CCTAGCTGCAGTGTAGA#..(((((((((..((((((....#)))))).))))))))).	4384	4401	1	-21.8	1	0.00219563	0.647	0	0	-9.59293	15	17	9	3UTR		0	0
hsa-miR-221-3p	NM_145865	ANKS4B	AGCTACATTGTCTGCTGGGTTTC#GAGGCCCAGGCAGGCAGATCACCTGAGGTC#.(((.((((((((((((((((((#))))))))).)))))))......)).))).	3256	3286	1	-23.1	0	7.13781e-05	0.397	0	0	-7.91236	21	30	9	3UTR		0	0
hsa-miR-221-3p	NM_147129	ALS2CL	AGCTACATTGTCTGCTGGGTTTC#GAGTCCCAGAGATGATGTGGG#..(((((((((((.(((((.(((#))).)))))))))))))))).	4114	4135	1	-23.6	1	8.2434e-05	0.338	0	0	-5.81384	19	21	16	3UTR		0	0
hsa-miR-221-3p	NM_147161	ACOT11	AGCTACATTGTCTGCTGGGTTTC#GGCCTTGCCTGCAGCAATGTAGCTG#((((((((((.((((.((((...#.)))))))))))))))))).	2935	2960	1	-26.1	1	9.14772e-06	0.353	0	0	-6.9954	18	20	18	3UTR		0	0
hsa-miR-221-3p	NM_147196	TMIE	AGCTACATTGTCTGCTGGGTTTC#GAAATGGAACCCCCAGCCCAGCAGACATCAAGCTC#((((....(((((((((((((..#.)))))))))))))...)))).	1146	1181	1	-27.9	0	0.0114898	0.471	1.59702	1.39039	-13.8149	17	22	13	3UTR		0	0
hsa-miR-221-3p	NM_147202	FAM219A	AGCTACATTGTCTGCTGGGTTTC#GGCTCAGCAGTGCAATGGGCTG#((((.((((((((((((((((..#)))))))))).)))))))))).	1930	1952	1	-25.8	0	4.69679e-06	0.412	0	0	-8.05661	20	22	10	3UTR		0	0
hsa-miR-221-3p	NM_147223	NCOA1	AGCTACATTGTCTGCTGGGTTTC#AGGCCCAGCAGAAGAGCC#.(((......((((((((((((.#))))))))))))..))).	4947	4965	1	-21.9	0	0.00179105	0.412	0	0	-15.9695	15	18	12	3UTR		0	0
hsa-miR-221-3p	NM_148842	RCC1L	AGCTACATTGTCTGCTGGGTTTC#GGGGCCTGGAGAGACCCTCCCACCCAGCAGACCAGGAGATAGCTG#(((((..(((((((((((((...#.)))))))))))...))..))))).	1525	1570	1	-26.6	0	0.000465617	0.324	2.58313	2.26847	-7.38222	18	25	11	3UTR		0	0
hsa-miR-221-3p	NM_148903	GREB1	AGCTACATTGTCTGCTGGGTTTC#GAGCCCAGCAGGACATCTGCA#.((.....((((((((((((((.#))))))))))).)))...)).	1834	1855	1	-23.1	0	0.000160285	0.5	0	0	-16.7027	16	21	11	3UTR		0	0
hsa-miR-221-3p	NM_148904	OSBPL9	AGCTACATTGTCTGCTGGGTTTC#GAAGCCCTAAGGCAGTAGTA#.(((((..(((((...(((((((#)))))))..)))))))))).	3480	3500	1	-20.5	0	0.00288014	0.632	0	0	-9.47598	17	20	10	3UTR		0	0
hsa-miR-221-3p	NM_152230	IPMK	AGCTACATTGTCTGCTGGGTTTC#GAAATCTCTGTCCACCCAGCCTTGACAATGAGCC#.(((.(((((((.(((((((...#.)))))))...)))))))))).	1864	1898	1	-26	0	0.0296007	0.647	0	0	-9.20149	17	22	10	3UTR		0	0
hsa-miR-221-3p	NM_152240	ZMAT3	AGCTACATTGTCTGCTGGGTTTC#ACTTAGTGAATGGCAGTGTGGTTG#((((((((((((((((((((...#))))))))...)))))))))))).	6345	6369	1	-20.7	1	0.000654849	0.559	0	0	-3.93757	20	24	12	3UTR		0	0
hsa-miR-221-3p	NM_152244	SNX11	AGCTACATTGTCTGCTGGGTTTC#AGCAGACATGTGGCC#.((((((.((((((((.......#)))))))))))))).	1709	1724	1	-21.6	1	8.45114e-05	0.515	0	0	-6.10696	14	15	14	3UTR		0	0
hsa-miR-221-3p	NM_152261	TMEM263	AGCTACATTGTCTGCTGGGTTTC#AAGCTTTCATAAATACCAGCAGCAATTGTAAGCA#.(((((((((.(((((((..((.#.))..))))))))))).))).)).	2241	2275	1	-21.8	1	0.0137054	0.691	2.10899	2.88707	-6.6181	18	24	11	3UTR		0	0
hsa-miR-221-3p	NM_152264	SLC39A13	AGCTACATTGTCTGCTGGGTTTC#GAGGCAGAGAGGGCGAGTGGCTG#((((((.((((((.((..(((((#)))))..)).)))))))))))).	1271	1294	1	-20.3	0	0.000871165	0.382	0.47703	-0.248236	-6.3381	19	23	12	3UTR		0	0
hsa-miR-221-3p	NM_152267	RNF185	AGCTACATTGTCTGCTGGGTTTC#ATTCCTGGTGAGACATGTGGCTT#(((((((.(((((((((((....#.)))))).)))))))))))).	1454	1477	1	-22.1	1	0.00115003	0.559	0.831905	0.23098	-6.25121	18	21	12	3UTR		0	0
hsa-miR-221-3p	NM_152279	ZNF585B	AGCTACATTGTCTGCTGGGTTTC#CCCAACTTAGGACAATGTCAGCTG#(((((((((((((..((((....#)))).....))))))))).)))).	5345	5369	1	-21.3	1	0.0139322	0.515	0	0	-5.52986	17	24	9	3UTR		0	0
hsa-miR-221-3p	NM_152316	ARL14EP	AGCTACATTGTCTGCTGGGTTTC#CCCTGTGCATCTGTTAATTCAGTTCACGTACAGCAGAGCATGTAGTTA#((((((((..(((((((......#.)))))))..)))))))).	1460	1508	1	-22.8	1	4.20914e-05	0.603	0	0	-6.23647	15	19	8	3UTR		0	0
hsa-miR-221-3p	NM_152318	NOPCHAP1	AGCTACATTGTCTGCTGGGTTTC#CAGCAGGCAAGAGAGCTT#((((...((((((((((......#))))))))))...)))).	22499	22517	1	-21.6	0	0.000225695	0.529	0	0	-11.5013	14	18	10	3UTR		0	0
hsa-miR-221-3p	NM_152338	ZG16	AGCTACATTGTCTGCTGGGTTTC#GAGAATCAGCAGACAATGGCA#.((..(((((((((((((.((((#)))).))))))))))))))).	2040	2061	1	-24.5	0	0.00040109	0.441	0	0	-10.9444	19	21	15	3UTR		0	0
hsa-miR-221-3p	NM_152346	SLC43A2	AGCTACATTGTCTGCTGGGTTTC#GAACGCCCGGCAGGCAGGCGCTC#(((....((((((((((((((((#))).)))))))))))))..))).	2082	2105	1	-25.1	0	2.09054e-08	0.324	0	0	-14.5333	19	23	13	3UTR		0	0
hsa-miR-221-3p	NM_152367	MAB21L3	AGCTACATTGTCTGCTGGGTTTC#GAGGCCCACAAGGCAACATATTCTGTGTGGCA#.((((((((((((..((((((((#))))))))..))))).........))))))).	2994	3026	1	-24.6	1	0.00107335	0.515	0	0	-5.38561	20	32	8	3UTR		0	0
hsa-miR-221-3p	NM_152377	C1orf87	AGCTACATTGTCTGCTGGGTTTC#CCCAGCCTAAGTGTAGTG#.((((((((....((((((....#))))))...)))))))).	1816	1834	1	-20.5	1	0.000462319	0.456	4.26395	3.17155	-12.4965	14	18	8	3UTR		0	0
hsa-miR-221-3p	NM_152388	TMEM237	AGCTACATTGTCTGCTGGGTTTC#GACCCAGGAGGCATATAAACCTGAGCAGCTAGTGGCC#.(((((..(((((.(((((((..#))))))).)))))..................))))).	3393	3430	1	-22.7	0	0.000919591	0.515	0	0	-8.50749	17	37	7	3UTR		0	1
hsa-miR-221-3p	NM_152403	EGFLAM	AGCTACATTGTCTGCTGGGTTTC#GACCCAGCAGAATTCTCTGTGTAGG#..((((((..(((((((((((..#))))))))))).......)))))).	3425	3450	1	-24.9	1	0.000798928	0.529	0	0	-7.2559	17	25	11	3UTR		0	0
hsa-miR-221-3p	NM_152404	UGT3A1	AGCTACATTGTCTGCTGGGTTTC#GAAATCCATGTGTAAGGCTTTGTGGCTT#(((((((..((((((((((((((#)))))))).))...))))..))))))).	2385	2413	1	-23.5	1	0.000202241	0.574	3.57003	3.78681	-7.3076	21	28	8	3UTR		0	0
hsa-miR-221-3p	NM_152407	GRPEL2	AGCTACATTGTCTGCTGGGTTTC#TCCAGCAGACAATCAGATGTTGTTG#(((.(((((((((((((((....#))))))))))).....)))).))).	2364	2389	1	-21.8	0	5.4148e-05	0.618	0	0	-6.9696	18	25	11	3UTR		0	0
hsa-miR-221-3p	NM_152424	AMER1	AGCTACATTGTCTGCTGGGTTTC#GGGACCTGGTAGACAGCTTGTCATTTTCTGGCTT#(((((((((((((((((((((((#))))))))))))))))..)))........)))).	7395	7429	1	-23.5	1	0.00573137	0.603	0	0	-3.93757	23	34	16	3UTR		0	0
hsa-miR-221-3p	NM_152443	RDH12	AGCTACATTGTCTGCTGGGTTTC#GAGGCTCAGCTGAGGCAAGAAGAGCA#.(((...((((((((((((((((#))))))))))..))))))....))).	1609	1635	1	-23.6	0	0.000154865	0.471	0	0	-11.357	19	26	10	3UTR		0	0
hsa-miR-221-3p	NM_152457	ZNF597	AGCTACATTGTCTGCTGGGTTTC#GCCCAGCACACAAATCACATTGTGGTG#.((((((((((.((((((((...#)))))))).)))).......)))))).	2388	2415	1	-21.9	1	0.000326912	0.574	0	0	-7.14013	18	27	8	3UTR		0	0
hsa-miR-221-3p	NM_152459	C16orf89	AGCTACATTGTCTGCTGGGTTTC#CCCAGCAAACAGAGAGCC#.(((.(.((((.(((((((....#))))))).)))).)))).	1437	1455	1	-20.3	0	0.217088	0.426	0.709972	-0.0723013	-12.8029	15	18	7	3UTR		0	0
hsa-miR-221-3p	NM_152478	ZNF583	AGCTACATTGTCTGCTGGGTTTC#AAACTCGGCACACAATGTC#....(((((((.((((((((((.#)))))))))).))))))).	4423	4442	1	-20.8	0	0.0257542	0.676	0	0	-12.8934	17	19	10	3UTR		0	0
hsa-miR-221-3p	NM_152495	CNIH3	AGCTACATTGTCTGCTGGGTTTC#GATACGTGAGAAATAGACCCGGCAGGCAGTCAGACTGAATGGGAGCTG#((((..((((((((((((((((.#.)))))))))))))))).............)))).	1437	1485	1	-27.1	0	0.0120138	0.426	1.91076	1.51153	-9.95757	20	35	16	3UTR		0	0
hsa-miR-221-3p	NM_152496	MANEAL	AGCTACATTGTCTGCTGGGTTTC#GAAGCTTCCAGGACCCAGCTTTCCTTTTCTGGTGTGGCCTTGTAGCTA#(((((((..(((.(((((((((.#.)))))))))................)))..))))))).	1629	1677	1	-24.6	1	0.00123901	0.5	-0.0512756	-0.0886677	-8.59673	19	39	9	3UTR		0	0
hsa-miR-221-3p	NM_152499	CCDC24	AGCTACATTGTCTGCTGGGTTTC#AGGCCTGGCAGACAGAGGTCTCATTCCAGCC#.(((((.(((((((((((((((.#)))))))))))))))..))........))).	1351	1382	1	-22.3	0	0.000716446	0.397	0	0	-5.33701	20	31	15	3UTR		0	0
hsa-miR-221-3p	NM_152515	CKAP2L	AGCTACATTGTCTGCTGGGTTTC#GGACCTGAGCAGACAT#........((((((((((((((.#)))))).)))))))).	3520	3536	1	-18.8	0	0.00799055	0.632	1.80518	2.25968	-19.4239	14	16	8	3UTR		0	0
hsa-miR-221-3p	NM_152522	ARL6IP6	AGCTACATTGTCTGCTGGGTTTC#GAAGCCCAGTGGCAATCCTGCC#.((...((((((.((((((((((#))))))))))))))))...)).	3169	3191	1	-23.6	0	7.35757e-07	0.515	1.9497	2.20272	-14.1345	18	22	16	3UTR		0	0
hsa-miR-221-3p	NM_152523	CCNYL1	AGCTACATTGTCTGCTGGGTTTC#AGCCTCAGCCACACAAGTAGCTG#((((((.((((..((((((((..#)))).))))...)))))))))).	2135	2158	1	-20.5	0	8.95689e-05	0.456	0.241463	-0.0517658	-10.1172	18	23	10	3UTR		0	0
hsa-miR-221-3p	NM_152550	SH3RF2	AGCTACATTGTCTGCTGGGTTTC#GAAAAATTGTCGTGCCCACTTTATGCCCCAGCATGGAGTATGTGGCC#.(((((((..(((((((((....#.)))))))..))..))))))).	2663	2710	1	-23.7	1	4.10161e-08	0.471	0	0	-6.09222	16	22	7	3UTR		0	0
hsa-miR-221-3p	NM_152588	TMTC2	AGCTACATTGTCTGCTGGGTTTC#GCCCAGTAGAATTCATTGTAT#...((((.((((((((((((...#))))))))))...)).)))).	3969	3990	1	-19.9	0	0.0117896	0.721	0	0	-8.82818	16	21	10	3UTR		0	0
hsa-miR-221-3p	NM_152592	SYNE3	AGCTACATTGTCTGCTGGGTTTC#AGCCCCAGAAAGCAGACAATGG#.....((((((((((((((((..#))))).....))))))))))).	9577	9599	1	-22.8	0	0.00787464	0.515	0	0	-13.6656	16	22	11	3UTR		0	0
hsa-miR-221-3p	NM_152600	ZNF579	AGCTACATTGTCTGCTGGGTTTC#GGATATTCTACATCTTCACTGTCCAATATGATATCCAGCAGACACACGTGGCTA#((((((..((((((((((((.((#.)).))))))))))))...)))))).	2796	2850	1	-29.2	0	0.00554334	0.632	1.22117	1.37672	-7.7949	20	26	12	3UTR		0	0
hsa-miR-221-3p	NM_152601	ZNF709	AGCTACATTGTCTGCTGGGTTTC#GAAACCCTGCGAATGTAGGCAGTGTGGG#..(((((((((((((.(((((((#))))))).......))))))))))))).	2548	2576	1	-26.1	1	0.00357758	0.559	1.1613	-0.0940311	-5.19005	20	28	13	3UTR		0	0
hsa-miR-221-3p	NM_152604	ZNF383	AGCTACATTGTCTGCTGGGTTTC#AGACTGGCCAGGCATGGTGGCTC#((((((..((((((.(.(((((.#))))).).))))))..)))))).	5869	5892	1	-21.9	0	0.000135603	0.544	0	0	-8.53035	18	23	6	3UTR		0	0
hsa-miR-221-3p	NM_152608	SDE2	AGCTACATTGTCTGCTGGGTTTC#GAGACCAGCCTGGGCAATGTAT#...(((((((((((((.((((((#)))))))))..)))))))))).	3087	3109	1	-22.3	0	0.0137988	0.544	0	0	-6.51454	19	22	10	3UTR		0	0
hsa-miR-221-3p	NM_152617	RNF168	AGCTACATTGTCTGCTGGGTTTC#TCCAGATGAGGATGTGGCTG#(((((((((.((..(((((....#)))))..)).))))))))).	3804	3824	1	-22.2	1	0.00151145	0.471	0	0	-7.32605	16	20	9	3UTR		0	0
hsa-miR-221-3p	NM_152624	DCP2	AGCTACATTGTCTGCTGGGTTTC#GGGACCCAGCAGCTACTTTGGGTC#.(((.((..((((((((((((((#))))))))))))..))..))))).	2135	2159	1	-23.2	0	1.64322e-05	0.441	1.33841	1.23657	-11.2824	19	24	12	3UTR		0	0
hsa-miR-221-3p	NM_152629	GLIS3	AGCTACATTGTCTGCTGGGTTTC#CTCAGCAGGAAATCAATGTGGA#..(((((((((((((((((....#)))))))))....)))))))).	4892	4914	1	-22.1	1	0.00414985	0.471	0	0	-4.957	17	22	9	3UTR		0	0
hsa-miR-221-3p	NM_152630	TENT5D	AGCTACATTGTCTGCTGGGTTTC#ACCACAGCACAAGTGGCC#.(((((.((((..(((((((...#))).))))))))))))).	2894	2912	1	-18	0	0.00223326	0.721	0	0	-9.97295	16	18	13	3UTR		0	0
hsa-miR-221-3p	NM_152667	NANP	AGCTACATTGTCTGCTGGGTTTC#GAGCAGTTCTCCAGCAGAAATGATGTAGA#..(((((((.(((((((((....#.)))))))))...))))))).	2954	2983	1	-22.9	1	0.0344309	0.691	0	0	-6.19951	16	21	9	3UTR		0	0
hsa-miR-221-3p	NM_152686	DNAJC18	AGCTACATTGTCTGCTGGGTTTC#AAATTAGGCGGGCATGGTAGCA#.(((((..((((((((.(((((.#))))).))))))))..))))).	4366	4388	1	-22.9	0	1.00236e-06	0.529	0	0	-7.65065	18	22	8	3UTR		0	0
hsa-miR-221-3p	NM_152722	HEPACAM	AGCTACATTGTCTGCTGGGTTTC#GAGGCTGGGCCGCTGTGTAGCC#.(((((((.((..(((.((((((#)))))).))).)).))))))).	2433	2455	1	-22.1	1	5.64012e-07	0.485	0	0	-9.48565	18	22	7	3UTR		0	0
hsa-miR-221-3p	NM_152723	CCDC89	AGCTACATTGTCTGCTGGGTTTC#ACCCACTGTAGATAGTTAGGCTT#((((..((((((((((((((...#)))))..)))))))))..)))).	1581	1604	1	-20.3	0	0.00942567	0.647	0	0	-9.95757	18	23	9	3UTR		0	0
hsa-miR-221-3p	NM_152745	NXPH1	AGCTACATTGTCTGCTGGGTTTC#GCCTGGCAGACACCATGTAAGTTA#((((((((((((((((((((...#))))))))))))..))))).))).	2877	2901	1	-24	1	0.00194219	0.632	0	0	-3.93757	20	24	12	3UTR		1	1
hsa-miR-221-3p	NM_152785	GCSAM	AGCTACATTGTCTGCTGGGTTTC#CCATCAGACAATGTT#....((((((((((.(((.....#))).)))))))))).	1319	1334	1	-18.6	0	0.0947368	0.647	4.05125	3.19416	-10.282	13	15	10	3UTR		0	0
hsa-miR-221-3p	NM_152791	ZNF555	AGCTACATTGTCTGCTGGGTTTC#AGGCCTAGCAGGCTCAGAGTTA#((((.....(((((((((((((.#)))))))))))))....)))).	8415	8437	1	-22.3	0	0.012055	0.618	0	0	-14.8713	17	22	13	3UTR		0	0
hsa-miR-221-3p	NM_152866	MS4A1	AGCTACATTGTCTGCTGGGTTTC#GAACCCATTCCATTTATCTTTCTACAGGGCTGACATTGTGGCA#.((((((.((((.(((((((((.#))))))).....................)).)))).)))))).	1760	1803	1	-23.2	1	0.00114406	0.544	0	0	-7.39609	19	43	7	3UTR		0	0
hsa-miR-221-3p	NM_152897	SNX21	AGCTACATTGTCTGCTGGGTTTC#GGAACCCCAGTTGACAGTTTAAAAGCA#.(((..((((((.((((((((((#))))))).))).)))))).....))).	955	982	1	-20.6	0	0.031448	0.515	3.15767	4.21191	-11.1025	19	27	7	3UTR		0	0
hsa-miR-221-3p	NM_152900	MAGI3	AGCTACATTGTCTGCTGGGTTTC#ACCCAGCAGTCATGGGCA#.(((.((.((.(((((((((...#))))))))).))))))).	4791	4809	1	-22.9	0	0.000597862	0.603	0	0	-13.0508	16	18	9	3UTR		0	0
hsa-miR-221-3p	NM_152909	ZNF548	AGCTACATTGTCTGCTGGGTTTC#AACTCAGTAGAGCAATGCTTTGGAGATTAGCTT#(((((((((((((((((((((..#))))))))))).)))))..........))))).	4677	4710	1	-22.1	1	0.00516919	0.544	0	0	-3.93757	21	33	11	3UTR		0	0
hsa-miR-221-3p	NM_152913	TMEM130	AGCTACATTGTCTGCTGGGTTTC#GAACCCGGGAGGCGGAGCTT#((((...((((((.((((((((.#)))))))).)))))))))).	2526	2546	1	-22.4	0	3.32181e-05	0.353	0	0	-12.3581	18	20	10	3UTR		0	0
hsa-miR-221-3p	NM_152988	SPPL2B	AGCTACATTGTCTGCTGGGTTTC#GGACCCAGCAGCTAGGAGCTT#((((.(...(.(((((((((((.#))))))))))))...))))).	2792	2813	1	-22.7	0	1.94051e-06	0.412	0	0	-15.7951	17	21	12	3UTR		0	0
hsa-miR-221-3p	NM_152999	STEAP2	AGCTACATTGTCTGCTGGGTTTC#GAGACCCATGGCAGTCCATATGCCTCCCTATGCAGTGAAGGGCC#.(((.((((((((((((((((((#))))))))..)))).................))))))...))).	3151	3195	1	-21.6	0	0.000485832	0.485	0	0	-7.91236	21	44	8	3UTR		0	0
hsa-miR-221-3p	NM_153000	APCDD1	AGCTACATTGTCTGCTGGGTTTC#GCCACAGCATTCAGTGTGGCA#.(((((((((..((((((((...#))).)))))..))))))))).	3581	3602	1	-26	1	5.7566e-07	0.618	0.102906	0.116872	-9.9649	17	21	9	3UTR		0	0
hsa-miR-221-3p	NM_153042	KDM1B	AGCTACATTGTCTGCTGGGTTTC#GAATGCAGCACAGATAGTGTGGG#..(((((((((((((((.((((.#)))).)))))..)))))))))).	2675	2698	1	-22.5	1	7.7645e-05	0.603	-0.0967144	0.438553	-4.957	19	23	10	3UTR		0	0
hsa-miR-221-3p	NM_153217	TMEM174	AGCTACATTGTCTGCTGGGTTTC#GAAGGCATTGGTGGCTCAATTTTAACCCCAGCAGCCAATGG#.....(((((.((((((((....#.)))))))).))))).	1096	1137	1	-22.6	0	0.00466202	0.529	0.754252	0.333759	-16.4904	13	16	8	3UTR		0	0
hsa-miR-221-3p	NM_153234	LIX1	AGCTACATTGTCTGCTGGGTTTC#AAGCAACCAGTAGCTCAAATGTAGTA#.((((((((..(((((((((((.#))))..)))))))....)))))))).	1845	1871	1	-19.6	1	0.00104915	0.676	0	0	-7.86061	19	26	8	3UTR		0	0
hsa-miR-221-3p	NM_153262	SYT14	AGCTACATTGTCTGCTGGGTTTC#GCCCAGTAAACAAAATGTATGTC#.((((((((((.((((((((...#)))))))).)))..))))).)).	4752	4775	1	-18.6	1	0.0684015	0.735	1.35893	1.35229	-7.14013	18	23	8	3UTR		0	0
hsa-miR-221-3p	NM_153271	SNX33	AGCTACATTGTCTGCTGGGTTTC#CCAGCAGGCAGGAGGAGCTA#((((...(((((((((((.....#)))))))))))....)))).	4500	4520	1	-24.5	0	0.000186359	0.338	0	0	-11.5013	15	20	11	3UTR		0	0
hsa-miR-221-3p	NM_153371	LNX2	AGCTACATTGTCTGCTGGGTTTC#GAACCTGGTGGCATAATGAGTA#.(((.(((((((((((((((((.#))))))))))).))))))))).	4433	4455	1	-20.2	0	0.00104628	0.691	0	0	-7.91236	20	22	11	3UTR		0	0
hsa-miR-221-3p	NM_153607	CREBRF	AGCTACATTGTCTGCTGGGTTTC#AAGCTGTGCAGCTTTACATTTTAACCAGGGGACTCTGTGGCA#.((((((..((((.((((.....#.)))).))))..)))))).	5061	5103	1	-24.4	1	6.67794e-05	0.588	0	0	-8.02019	14	19	6	3UTR		0	0
hsa-miR-221-3p	NM_153620	HOXA1	AGCTACATTGTCTGCTGGGTTTC#GAAGCCCTGCAGAGCACAAACTTCAGAAACCCGGCTTCCTGTGCTA#(((.(((......((((((((((#.))))))))))....)))))).	1585	1631	1	-20.5	0	0.000974186	0.515	0	0	-19.0428	16	22	10	3UTR		0	0
hsa-miR-221-3p	NM_153634	CPNE8	AGCTACATTGTCTGCTGGGTTTC#GAGTTTAAGCCCGGCAGATGTGTCTCCTGGTTG#(((((((.((((((((((((((.#.))))))))))))))))).....)))).	2388	2421	1	-23.4	1	0.00245466	0.529	0	0	-6.25121	21	28	17	3UTR		1	1
hsa-miR-221-3p	NM_153638	PANK2	AGCTACATTGTCTGCTGGGTTTC#GGAGGCCAGCCTGGGCAACATAGTG#.((((..(((((((((((.((((#)))).)))))..))))))..)))).	7788	7813	1	-21	0	0.00917174	0.529	0	0	-7.23797	19	25	6	3UTR		0	0
hsa-miR-221-3p	NM_153698	PRXL2C	AGCTACATTGTCTGCTGGGTTTC#ACTCAGAGGAAGTGTGGCA#.((((((((.(((.((((((...#)))))).))))))))))).	1426	1445	1	-20.4	1	2.4875e-06	0.588	0.954704	1.93405	-5.89267	17	19	11	3UTR		0	0
hsa-miR-221-3p	NM_153836	CREG2	AGCTACATTGTCTGCTGGGTTTC#ACCCAGGACCTATGTAGTG#.(((((((.(((..((((((...#)))))))))..))))))).	3333	3352	1	-19.4	1	0.0666332	0.706	0.209843	0.192862	-6.99569	16	19	9	3UTR		0	0
hsa-miR-221-3p	NM_153840	ADGRF1	AGCTACATTGTCTGCTGGGTTTC#GGAACCCAGCATCAAGAAGTGGG#..((((.(((..(((((((((((#))))))))))).)))...)))).	4749	4772	1	-22.6	0	0.040552	0.456	-0.0177484	0.0154344	-12.6723	18	23	11	3UTR		0	0
hsa-miR-221-3p	NM_170665	ATP2A2	AGCTACATTGTCTGCTGGGTTTC#GAGCCAGCAGACATTGTCAGCA#.((((((.((((((((((.((..#)).)))))))))).))).))).	3979	4001	1	-27.6	1	0.00236188	0.662	0	0	-6.10696	18	22	10	3UTR	MIRT046967	0	0
hsa-miR-221-3p	NM_170731	BDNF	AGCTACATTGTCTGCTGGGTTTC#ATCCAGCAATTGTGTGGTC#.(((((((.((.((((((((...#)))))))))).))))))).	3826	3845	1	-19.5	1	0.00333539	0.574	0	0	-8.19652	17	19	10	3UTR		0	0
hsa-miR-221-3p	NM_170771	ALDH8A1	AGCTACATTGTCTGCTGGGTTTC#GAGCCCAGGCGGTTGAGGCTGCAGTGAGCC#.(((.(((((((((((((((((.#)))))))).)))........))))))))).	1903	1933	1	-22.4	0	4.82745e-06	0.412	1.04897	0.617488	-7.91236	20	30	9	3UTR		0	0
hsa-miR-221-3p	NM_170774	RASSF2	AGCTACATTGTCTGCTGGGTTTC#GAAGCCCAGAAGGGCTTCTGCAAGCTG#((((.((..((((.(((((((((#)))))))))..))))...))..)))).	2835	2862	1	-21.2	0	1.57288e-05	0.456	0	0	-12.2835	19	27	9	3UTR		0	0
hsa-miR-221-3p	NM_171998	RAB39B	AGCTACATTGTCTGCTGGGTTTC#AAATCCAGCAGAGGTGGCTG#((((((....((((((((((((.#)))))))))))).)))))).	3029	3049	1	-24.2	0	4.22801e-05	0.676	0	0	-10.0938	18	20	12	3UTR		0	0
hsa-miR-221-3p	NM_172005	WFDC13	AGCTACATTGTCTGCTGGGTTTC#GCCCCCGGCATGTAGCACCACCTGAGCCAGAAACTGCAGAGGACATGACAGTGTGGCA#.((((((((((((((((((((((#.)))))).)))....)).))))))))))).	962	1020	1	-24.3	1	0.000232403	0.588	0.497286	-0.127679	-3.79332	22	30	11	3UTR		0	0
hsa-miR-221-3p	NM_172107	KCNQ2	AGCTACATTGTCTGCTGGGTTTC#GCCCAGCAGACGTGGTA#.(((((...(((((((((((...#)))))))))))))))).	7503	7520	1	-26.1	0	0.000942103	0.353	3.03804	3.03112	-8.70704	16	17	16	3UTR		0	0
hsa-miR-221-3p	NM_172177	MRPL42	AGCTACATTGTCTGCTGGGTTTC#CCCAGCAGAGTGGCA#.(((((....(((((((((....#)))))))))))))).	9243	9258	1	-23.4	0	0.000854202	0.485	0	0	-9.94954	14	15	14	3UTR		0	0
hsa-miR-221-3p	NM_172249	CSF2RA	AGCTACATTGTCTGCTGGGTTTC#GAGACCCAGAGGGTGTAGG#..((((((..(((.(((((((((#)))))))))))))))))).	984	1003	1	-22.1	1	5.12312e-06	0.426	0	0	-8.11274	18	19	18	3UTR		0	0
hsa-miR-221-3p	NM_172347	KCNG4	AGCTACATTGTCTGCTGGGTTTC#GAAGCCCAGTTTGGGATGAGGAGCC#.(((...((((((((((((((((#))))))))))...))))))..))).	3315	3340	1	-22.4	0	0.000194398	0.441	0	0	-11.357	19	25	10	3UTR		0	0
hsa-miR-221-3p	NM_172370	DAOA	AGCTACATTGTCTGCTGGGTTTC#GAAGCAGATTCTTCCCAGCCAATCCTTCTGATGACAATGTAGTC#.(((((((((((.((((((....#.)))))).............))))))))))).	556	600	1	-24	1	0.00991448	0.515	1.81805	1.56758	-5.08246	17	32	11	3UTR		0	0
hsa-miR-221-3p	NM_173082	SHPRH	AGCTACATTGTCTGCTGGGTTTC#GAAACTTTCTTAGGACATGTAGCA#.((((((.(((((...(((((((#))))))).....))))))))))).	6934	6958	1	-20.3	1	0.17178	0.574	0	0	-7.9323	18	24	11	3UTR		0	0
hsa-miR-221-3p	NM_173090	CAPN3	AGCTACATTGTCTGCTGGGTTTC#GGACCCAGCAGCTACACCCCTACAGGCTT#((((....((((((((((((((.#)))))))))))..)))........)))).	845	874	1	-19.6	0	0.013248	0.441	3.89647	4.78461	-13.8149	18	29	11	3UTR		0	0
hsa-miR-221-3p	NM_173163	NFATC3	AGCTACATTGTCTGCTGGGTTTC#TTCAGCAGATCACTGTGGCC#.((((((.(((((((((((....#))))))))).)).)))))).	5354	5374	1	-22.6	1	0.000466402	0.574	0	0	-6.10696	17	20	9	3UTR		1	1
hsa-miR-221-3p	NM_173217	ST6GAL1	AGCTACATTGTCTGCTGGGTTTC#CCCAGCAGAATGATGC#.....((((((((((((((....#))))))))).))))).	1529	1545	1	-20.2	0	6.08457e-05	0.559	0.0887274	0.0708773	-13.6656	14	16	9	3UTR		0	0
hsa-miR-221-3p	NM_173355	UPP2	AGCTACATTGTCTGCTGGGTTTC#GGGATGGGTAGAGGATGACTGGCA#.((((((((.((((((..(((((#))))).)))))).))))..)))).	2119	2143	1	-18	1	0.0123092	0.544	0	0	-5.03583	19	24	6	3UTR		0	0
hsa-miR-221-3p	NM_173465	COL23A1	AGCTACATTGTCTGCTGGGTTTC#GGGGCCCAGCCTGGACTGACTGCTA#(((......((((((((((((((#))))))))))..)))).....))).	2525	2550	1	-22.2	0	0.0111783	0.441	0.959542	1.05568	-17.9033	17	25	10	3UTR		0	0
hsa-miR-221-3p	NM_173467	MCAT	AGCTACATTGTCTGCTGGGTTTC#GAACCCAGTTGGCCTTGGCA#.((((....(((.(((((((((.#))))))))).)))..)))).	1689	1709	1	-20.2	0	0.00354262	0.544	0	0	-11.8971	16	20	9	3UTR		0	0
hsa-miR-221-3p	NM_173485	TSHZ2	AGCTACATTGTCTGCTGGGTTTC#TCCAGGGTCTATGGACAATGTGGCA#.((((((((((((((((((....#)))))......))))))))))))).	7766	7791	1	-22.9	1	6.48573e-05	0.632	0	0	-3.79332	18	25	13	3UTR		0	0
hsa-miR-221-3p	NM_173493	PASD1	AGCTACATTGTCTGCTGGGTTTC#GAAGCCCAGAGAGAATGG#.....((((.(((.(((((((((#)))))))))))).)))).	2993	3011	1	-22.6	0	2.20398e-05	0.5	0	0	-15.7649	16	18	12	3UTR		0	0
hsa-miR-221-3p	NM_173495	PTCHD1	AGCTACATTGTCTGCTGGGTTTC#GAACCCGGGAGGTAGAAGTTGCAGTGAGCC#.(((.((((((((.((((((((.#)))))))).)).........))))))))).	8905	8935	1	-22	0	0.00843154	0.426	0	0	-8.7692	19	30	9	3UTR		1	0
hsa-miR-221-3p	NM_173509	FAM163A	AGCTACATTGTCTGCTGGGTTTC#GAGCCCGGCATTCTATGTAAGCA#.(((((((.(..((((((((((.#))))))))))..).))))).)).	1956	1979	1	-23.3	1	0.0113713	0.412	4.24824	1.40699	-11.0213	18	23	10	3UTR		0	0
hsa-miR-221-3p	NM_173536	GABRG1	AGCTACATTGTCTGCTGGGTTTC#GAACTGGCATTGAAGGTACCCAGTAGACTCTTAAGCC#.(((.....(((((((((((...#.))))))))))).....))).	4938	4975	1	-23	0	0.000728282	0.603	0	0	-14.727	14	21	11	3UTR		0	1
hsa-miR-221-3p	NM_173537	GTF2IRD2	AGCTACATTGTCTGCTGGGTTTC#GCCCAGCTGACAAAATGAGTTC#((((.(((((((.(((((((...#))))))).))))..))))))).	3465	3487	1	-21.3	0	0.00166941	0.662	0.0930721	0.621704	-9.34574	18	22	7	3UTR		0	0
hsa-miR-221-3p	NM_173564	NYAP1	AGCTACATTGTCTGCTGGGTTTC#GAATTTGGTAGTCAGTGTGGCC#.(((((((((.(((((((((((.#))))))))))).))))))))).	3349	3371	1	-24	1	0.000108636	0.603	0	0	-6.6181	20	22	11	3UTR		0	0
hsa-miR-221-3p	NM_173569	UBN2	AGCTACATTGTCTGCTGGGTTTC#CCCAGCAGAGGATTCAGGCA#.(((..(((.(((((((((....#))))))))).)))...))).	11872	11892	1	-23.4	0	0.000320567	0.529	0	0	-11.0558	15	20	9	3UTR	MIRT464592	1	1
hsa-miR-221-3p	NM_173593	B4GALNT3	AGCTACATTGTCTGCTGGGTTTC#GGGAGCTGGCGGGCAGGGGGCTT#((((...(((((((((((.((((#)))).)))))))))))..)))).	4155	4178	1	-22.9	0	0.000101906	0.309	0	0	-11.5013	19	23	11	3UTR		0	0
hsa-miR-221-3p	NM_173601	GXYLT1	AGCTACATTGTCTGCTGGGTTTC#ATCCAGCTGTAGAAAATGTGGTTT#(((((((((.((((((((((...#)))))))...))).))))))))).	2630	2654	1	-20.3	1	0.115473	0.691	0	0	-5.18008	19	24	9	3UTR		0	0
hsa-miR-221-3p	NM_173630	RTTN	AGCTACATTGTCTGCTGGGTTTC#GAAGCCAGCTGTGTGTAGCA#.(((((((.....(((((.(((.#))).)))))...))))))).	6766	6786	1	-21	1	1.938e-05	0.485	0	0	-13.5529	15	20	7	3UTR		0	0
hsa-miR-221-3p	NM_173642	RIMKLA	AGCTACATTGTCTGCTGGGTTTC#GAACCCAAACACTGGGGAATGTGGCC#.((((((((.((((.(((((((.#))))))).....)))).)))))))).	9605	9631	1	-20.6	1	2.2696e-05	0.603	0	0	-5.77128	19	26	8	3UTR		0	0
hsa-miR-221-3p	NM_173663	FAM153A	AGCTACATTGTCTGCTGGGTTTC#AGGCCAGCAGGCCCTCAGTAGGTCCTGGTGTCAAGCA#.(((((((((((((((((.((..#)).)))))))))..............)))))..))).	1589	1626	1	-20.2	1	1.88188e-06	0.368	0	0	-3.79332	19	37	9	3UTR		0	0
hsa-miR-221-3p	NM_173664	ARL10	AGCTACATTGTCTGCTGGGTTTC#GAACCCAGGAGGCAGAGCTT#((((...((((((.((((((((.#)))))))).)))))))))).	7728	7748	1	-23.9	0	0.00110501	0.382	0	0	-12.3581	18	20	10	3UTR		0	0
hsa-miR-221-3p	NM_173678	TCAF2	AGCTACATTGTCTGCTGGGTTTC#AGACCCCTCAGTCATGTAGCG#.((((((.((.(((..((((((.#))))))..))).)))))))).	2591	2612	1	-21.7	1	0.000861358	0.397	0	0	-9.90023	17	21	8	3UTR		0	0
hsa-miR-221-3p	NM_173680	ZNF775	AGCTACATTGTCTGCTGGGTTTC#GGAAGCCAGAGGCTGTGGCG#.((((((..((((.((((.((((#)))).)))))))))))))).	2163	2183	1	-22.1	1	1.93872e-05	0.412	0	0	-8.02019	18	20	14	3UTR		0	0
hsa-miR-221-3p	NM_173803	MPV17L	AGCTACATTGTCTGCTGGGTTTC#GAACCCGGGAGGCAGAGATTGCAGTGAGCTG#((((.((((((((.((((((((.#)))))))).))))).........))))))).	3021	3052	1	-23.7	0	0.000901802	0.426	0.0796375	-0.0212344	-8.91345	20	31	8	3UTR		0	0
hsa-miR-221-3p	NM_173808	NEGR1	AGCTACATTGTCTGCTGGGTTTC#GAACCCAGGAGGCAGAGGTTGCA#.((.((.((((((.((((((((.#)))))))).))))))..)).)).	11130	11153	1	-24.9	0	0.000108481	0.471	0	0	-9.22587	18	23	8	3UTR		0	0
hsa-miR-221-3p	NM_173844	MALT1	AGCTACATTGTCTGCTGGGTTTC#GAGTCACCATGCCCGGCCGGCAGTGTAT#...(((((((((.(((((((...#.))))))).))))))))).	8267	8295	1	-25.4	0	0.0076353	0.544	0	0	-7.80367	16	19	9	3UTR		0	0
hsa-miR-221-3p	NM_173855	MORN3	AGCTACATTGTCTGCTGGGTTTC#GAGACCAGCTTAGGCAACATAGCA#.((((..(((((((((.((((((#)))))))))..))))))..)))).	1364	1388	1	-21.3	0	0.00424477	0.574	0.885964	0.225206	-7.23797	19	24	9	3UTR		0	0
hsa-miR-221-3p	NM_173860	HOXC12	AGCTACATTGTCTGCTGGGTTTC#GACCCCAGCCCCAGCCCAGTAGACGCTGGGCTG#((((.((.(((((((((((((..#.))))))))))))).)))))).	2244	2277	1	-27.2	0	0.000393256	0.368	0.134061	0.0656202	-10.3702	19	22	13	3UTR		0	0
hsa-miR-221-3p	NM_174899	FBXO36	AGCTACATTGTCTGCTGGGTTTC#GAAATCCAGTGCAATCTGCTTCCCAGCAGATGAGGAGCC#.(((...((((((((((((....#.))))))))))))..))).	2132	2171	1	-23.9	0	0.00020118	0.515	0	0	-11.357	15	19	12	3UTR		0	0
hsa-miR-221-3p	NM_174909	TMEM167A	AGCTACATTGTCTGCTGGGTTTC#GACCACGGAATCCTGTTCTCTAACCCAAGGGGCAGTGTAGGTG#(.(((((((((((..((((((..#.))))))..))))))))))).).	2376	2419	1	-25.9	1	0.00195226	0.559	0	0	-6.69354	18	23	11	3UTR		0	1
hsa-miR-221-3p	NM_174912	FAAH2	AGCTACATTGTCTGCTGGGTTTC#GAAATCAAGCACCAGCAGACAAGCA#.(((....((((((((((((((.#.)))).))))))))))))).	1788	1813	1	-23.7	0	0.00739071	0.603	0	0	-13.6706	17	20	13	3UTR		0	0
hsa-miR-221-3p	NM_174926	TLCD5	AGCTACATTGTCTGCTGGGTTTC#AGACTCAGTGGACTCAGCA#.(((.....(((((((((((((.#)))))))))))))..))).	1411	1430	1	-19.3	0	0.000205729	0.647	0.497861	2.18095	-14.727	16	19	13	3UTR		0	0
hsa-miR-221-3p	NM_174931	GPATCH11	AGCTACATTGTCTGCTGGGTTTC#CCTAGGGATAGACAATTTAGCA#.((((.(((((((((((((....#)))))...)))))))).)))).	901	923	1	-19.5	0	0.00908218	0.691	0.691752	0.639201	-5.69428	17	22	8	3UTR		0	0
hsa-miR-221-3p	NM_174977	SEC14L4	AGCTACATTGTCTGCTGGGTTTC#ACCCAGGAGGCGGAGGTTGTAGTG#.((((((((((((.((((((...#)))))).))))))....)))))).	2075	2099	1	-23.5	1	6.27784e-06	0.412	0	0	-4.65016	18	24	6	3UTR		0	0
hsa-miR-221-3p	NM_174983	MFSD12	AGCTACATTGTCTGCTGGGTTTC#GGGCAGCAGGGCTGCCCGGCAGGCTTGGTGGACTC#((((((...(((((((((((...#.)))))))))))...)))).)).	2073	2108	1	-26.1	0	0.0037352	0.382	1.07965	1.38951	-8.85129	17	23	11	3UTR		0	0
hsa-miR-221-3p	NM_175066	DDX51	AGCTACATTGTCTGCTGGGTTTC#GAGACCCTCGCAGAAAAGTGTCACAGAGCA#.((((((((.(((((.(((((((#)))))))..)))))..))))).....))).	4169	4199	1	-23.2	1	0.00913415	0.471	0	0	-5.26888	20	30	7	3UTR		0	0
hsa-miR-221-3p	NM_175709	CBX7	AGCTACATTGTCTGCTGGGTTTC#GAAACCCTGGCCAGGCGAACGTGGG#..((((.((((((((((((((((#))))))).))).))))))..)))).	1748	1773	1	-22.8	0	7.39253e-07	0.426	0	0	-6.50069	20	25	7	3UTR		0	0
hsa-miR-221-3p	NM_175726	IL5RA	AGCTACATTGTCTGCTGGGTTTC#GAAGCAACCAGGAGACACATGTGCC#.((.(((((((((.(((((((((#)))))..)))).))))).)))))).	4801	4826	1	-22.4	0	0.00390516	0.515	0	0	-7.68219	20	25	6	3UTR		0	0
hsa-miR-221-3p	NM_175736	FMNL3	AGCTACATTGTCTGCTGGGTTTC#AAAGCTGGCAGGCAGAGTGGTC#.(((((.(((((((((((.(((.#))).))))))))))).))))).	7264	7286	1	-24.3	0	0.000708308	0.426	0	0	-5.33701	19	22	11	3UTR		0	0
hsa-miR-221-3p	NM_175902	OGFOD3	AGCTACATTGTCTGCTGGGTTTC#GGGACCCAGCAGGACGGGGCA#.(((...((((((((((((((((#)))))))))))).))))))).	1516	1537	1	-25.3	0	9.15003e-05	0.368	-0.0135779	-0.202888	-11.357	19	21	12	3UTR		0	0
hsa-miR-221-3p	NM_175920	LNPEP	AGCTACATTGTCTGCTGGGTTTC#GCCTAGGGGGCAATGGTAGA#..(((((((((((.((((((...#)))))).)))))))).))).	9735	9755	1	-23.3	1	0.000564594	0.515	0	0	-5.81384	17	20	8	3UTR		0	0
hsa-miR-221-3p	NM_175929	FGF14	AGCTACATTGTCTGCTGGGTTTC#CCCAGCAGGCAGTT#......(((((((((((((....#))))))))))))).	13009	13023	1	-23.1	0	0.000189374	0.559	0	0	-15.5666	13	14	13	3UTR		1	1
hsa-miR-221-3p	NM_176072	P2RY2	AGCTACATTGTCTGCTGGGTTTC#AGGCCCAGAGAGGAAGGTGGCTT#((((((.((.(((.((((((((.#))))))))))).))..)))))).	1966	1989	1	-23.5	0	0.000361344	0.5	0	0	-7.58061	19	23	11	3UTR		0	0
hsa-miR-221-3p	NM_176792	MRPL43	AGCTACATTGTCTGCTGGGTTTC#ATCCAGGCTGCAGACCCCACGCAGTGTCTCATACAGTGGAATGTGGCA#.((((((((.(((((.((((((.#.))))))...)))).............).)))))))).	739	787	1	-21.3	1	0.00830546	0.441	0.146624	0.129752	-5.26888	19	38	8	3UTR		0	0
hsa-miR-221-3p	NM_176818	GATC	AGCTACATTGTCTGCTGGGTTTC#GGCCCTGGTAGAAATTATGTAGTTT#((((((((..(((((((((((..#))))).))))))....)))))))).	2351	2376	1	-21.1	1	0.0124366	0.765	0	0	-6.23647	19	25	8	3UTR		0	0
hsa-miR-221-3p	NM_176821	NLRP10	AGCTACATTGTCTGCTGGGTTTC#GAGACCGAGACCATCCTGGCCAATGTGGTG#.(((((((((.(((((.((((((#)))))).)).)......)).))))))))).	3015	3045	1	-19.5	1	0.000561125	0.515	-1.2182	-0.0991149	-6.6181	20	30	9	3UTR		0	0
hsa-miR-221-3p	NM_176822	NLRP14	AGCTACATTGTCTGCTGGGTTTC#GCCCAGAGATAGTGCACTTGGCA#.((((((((((((.((((((...#))))))))))))))....)))).	3691	3714	1	-22.3	1	2.47696e-05	0.544	0.664519	-0.176813	-4.65016	18	23	14	3UTR		0	0
hsa-miR-221-3p	NM_176823	S100A7A	AGCTACATTGTCTGCTGGGTTTC#ACCCAGCACATAGTAGTA#.(((((..(((..(((((((...#))))))))))..))))).	2487	2505	1	-20	0	0.00951996	0.559	0	0	-12.2866	15	18	10	3UTR		0	0
hsa-miR-221-3p	NM_177402	SYT2	AGCTACATTGTCTGCTGGGTTTC#GAGTCCCTCAGTAGAGGATGAGATAGCA#.((((((((.(((((((((....#.))))))))).))))...)))).	4671	4699	1	-22.5	1	0.000685591	0.5	0	0	-5.03583	17	23	9	3UTR		0	0
hsa-miR-221-3p	NM_177422	AGO3	AGCTACATTGTCTGCTGGGTTTC#GAACCCGGTAGGCGGAGGTTGCA#.((.((.(((((((((((((((.#)))))))))))))))..)).)).	13380	13403	1	-25.5	0	0.000626845	0.412	0	0	-8.36903	19	23	15	3UTR		0	0
hsa-miR-221-3p	NM_177452	TRAPPC6B	AGCTACATTGTCTGCTGGGTTTC#AGCCTAGAGAGGGTGAGTG#.(((.((((.(((.(((((((..#)))))))))).))))))).	2587	2606	1	-18.1	0	0.000717835	0.559	4.36745	4.87223	-10.0117	17	19	10	3UTR		0	0
hsa-miR-221-3p	NM_177455	BHLHA15	AGCTACATTGTCTGCTGGGTTTC#AAGCCCGGCAGAGCCTAAGGCTG#((((......((((((((((((.#))))))))))))......)))).	1181	1204	1	-24.3	0	9.1895e-06	0.368	3.11045	2.56178	-16.1138	16	23	12	3UTR		0	0
hsa-miR-221-3p	NM_177524	MEST	AGCTACATTGTCTGCTGGGTTTC#CCCAGAGAGGCTTTCCAATGTAGCTC#(((((((((((((.(((((....#)))))))).......)))))))))).	2169	2195	1	-22.2	1	0.0158435	0.515	0.962492	0.446443	-4.79441	18	26	10	3UTR		0	0
hsa-miR-221-3p	NM_177952	PPM1A	AGCTACATTGTCTGCTGGGTTTC#CAGCAGACTGTGTGTGTTC#((((((((.((((((((......#)))))))).))))).))).	3895	3914	1	-20.2	1	0.000169134	0.559	0.725784	0.383002	-4.99396	16	19	8	3UTR		0	0
hsa-miR-221-3p	NM_177985	ARL5A	AGCTACATTGTCTGCTGGGTTTC#GAAAGCTAGCAGATTCTTGGCTT#(((((....(((((((((.((((#)))).)))))))))...))))).	1285	1308	1	-22.8	0	5.98461e-05	0.632	1.77877	1.13898	-10.7522	18	23	9	3UTR		0	0
hsa-miR-221-3p	NM_177999	ASB6	AGCTACATTGTCTGCTGGGTTTC#GAGGCCCAGGGAATCGGTTACTGATGTGGCC#.((((((((((((.(((((((((#)))))))))))).........))))))))).	3311	3342	1	-23	1	2.05386e-06	0.368	0	0	-4.65016	21	31	12	3UTR		0	0
hsa-miR-221-3p	NM_178122	STPG1	AGCTACATTGTCTGCTGGGTTTC#CCCAGCAGGCTTTGA#.....((..((((((((((....#))))))))))..)).	1931	1946	1	-22	0	0.0107806	0.515	0.363019	0.631823	-17.0356	12	15	10	3UTR		0	0
hsa-miR-221-3p	NM_178126	RETREG3	AGCTACATTGTCTGCTGGGTTTC#GAGCCAATAGTAAGAATGTGGCTG#(((((((((.(.((((((((((.#)))))..)))))).))))))))).	3045	3069	1	-19.4	1	0.00756945	0.515	0.835453	-0.180435	-8.52688	20	24	9	3UTR		0	0
hsa-miR-221-3p	NM_178129	P2RY8	AGCTACATTGTCTGCTGGGTTTC#AAGCCCAGCAGCGCACAGGGTGCTT#(((.((.(((((((((((((((.#)))))))))))...)))).))))).	1589	1614	1	-23.5	0	4.36347e-06	0.441	3.90713	4.25075	-8.51328	20	25	11	3UTR		0	0
hsa-miR-221-3p	NM_178152	DCX	AGCTACATTGTCTGCTGGGTTTC#GGAACCCAGTGGTGGTGGGGTAGCTCAGATGCCCCTAGACAAGCTTCAGATGTCTGTAGCTA#(((((((((((((((((((((((#))))))))))..........................))))))............))))))).	2969	3031	1	-25.2	1	0.00070156	0.544	0	0	-3.93757	23	62	10	3UTR		1	0
hsa-miR-221-3p	NM_178270	ATG4A	AGCTACATTGTCTGCTGGGTTTC#GAGGGCTGGGTTTGGCCTGCAGGCTGTAGCTT#(((((((..((((((.(((((..#.)))))))))))))))))).	1915	1947	1	-23	1	1.90485e-05	0.5	0	0	-7.54065	18	20	18	3UTR		0	0
hsa-miR-221-3p	NM_178432	CDK20	AGCTACATTGTCTGCTGGGTTTC#ACCCATCAGGACAGTGAGCTC#((((.(((((((((.(((((...#))))).))).)))))))))).	1363	1384	1	-22.2	0	0.00252346	0.456	0	0	-8.79206	18	21	10	3UTR		0	0
hsa-miR-221-3p	NM_178457	ZNF831	AGCTACATTGTCTGCTGGGTTTC#GAGACACAGCAGCAATGCAGAGCA#.(((.(((((.((((((.(((((#))))).)))))))))))...))).	6835	6859	1	-23.5	0	0.00306981	0.559	0	0	-10.7371	19	24	11	3UTR		0	0
hsa-miR-221-3p	NM_178471	GPR119	AGCTACATTGTCTGCTGGGTTTC#ACCTTGTAGGATGCAATGTAGG#..(((((((((((((.((((...#)))).))))...))))))))).	2869	2891	1	-19.6	1	0.00151896	0.632	2.65688	3.10079	-5.19005	17	22	9	3UTR		0	0
hsa-miR-221-3p	NM_178820	FBXO27	AGCTACATTGTCTGCTGGGTTTC#GAGCCCCAGAGTTCAAGACCAGCCTGGGCAATGTAGTA#.(((((((((((((((((..((.#.))..)))))..)))))))))))).	1877	1915	1	-25.4	1	0.000128591	0.529	0	0	-3.79332	19	25	12	3UTR		0	0
hsa-miR-221-3p	NM_178858	SFXN2	AGCTACATTGTCTGCTGGGTTTC#GAAACCTAGCCTTTATGTGGA#..((((((.....((((((((((#))))))))))....)))))).	5002	5023	1	-20.9	1	0.00701008	0.603	-0.447252	-0.169189	-14.7166	16	21	10	3UTR		0	0
hsa-miR-221-3p	NM_180989	GPR180	AGCTACATTGTCTGCTGGGTTTC#GCCCACTAGGGCCATTCTCCACAGTGTAGCC#.(((((((((((((.(((((...#))))).)))...........)))))))))).	4553	4584	1	-20.8	1	0.0417554	0.559	0	0	-4.52877	18	31	10	3UTR		0	0
hsa-miR-221-3p	NM_181340	DCAF4	AGCTACATTGTCTGCTGGGTTTC#GAAGCCCAGTGATGAGACGGTGAGATGGTTT#(((((((((((((((((((((((#))))))))))....))))))))...))))).	1832	1863	1	-25.2	1	0.00201267	0.456	2.81489	1.93297	-3.93757	23	31	10	3UTR		0	0
hsa-miR-221-3p	NM_181349	SMURF1	AGCTACATTGTCTGCTGGGTTTC#CCCAGCAGCCGGTTCTGGGTAGCA#.(((((((((.((((((((....#)))))))).)))).....))))).	3017	3041	1	-23.7	1	2.75357e-05	0.574	0	0	-6.6181	17	24	8	3UTR		0	0
hsa-miR-221-3p	NM_181358	HIPK1	AGCTACATTGTCTGCTGGGTTTC#GCCTAGCAGTGTGTGGCTT#((((((((...(((((((((...#))))))))).)))))))).	5573	5592	1	-25	1	0.00193504	0.632	0	0	-9.06125	17	19	9	3UTR		1	1
hsa-miR-221-3p	NM_181425	FXN	AGCTACATTGTCTGCTGGGTTTC#ACCCAGCAGTAAAATTGGCTC#(((((..((..(((((((((...#)))))))))..))..))))).	5381	5402	1	-22.5	0	0.0322901	0.574	0.438767	0.439337	-11.4495	16	21	9	3UTR		0	1
hsa-miR-221-3p	NM_181449	CD300E	AGCTACATTGTCTGCTGGGTTTC#GCCTAGCAGATGTAGCA#.((((((...((((((((((...#)))))))))))))))).	2789	2806	1	-24.9	1	0.00013179	0.515	3.73585	2.46747	-8.40586	16	17	16	3UTR		0	0
hsa-miR-221-3p	NM_181491	MED22	AGCTACATTGTCTGCTGGGTTTC#AACTCAGCAGACATGAGGCAGCATTTCCTCCACACTAGGGTGGCTG#((((((..(((((((((((((..#)))))))))))))..........................)))))).	1720	1766	1	-25.8	0	0.000101723	0.426	0	0	-7.7949	19	46	13	3UTR		0	0
hsa-miR-221-3p	NM_181609	KRTAP19-3	AGCTACATTGTCTGCTGGGTTTC#CCCAGCAACACAATGTGT#...((((((((.(((((((....#)))))))..)))))))).	310	328	1	-21	0	0.00288395	0.588	-0.217839	0.183581	-9.86134	15	18	8	3UTR		0	0
hsa-miR-221-3p	NM_181659	NCOA3	AGCTACATTGTCTGCTGGGTTTC#CCCAGCCTTCAGGTGTAGTA#.((((((((....((((((....#)))))).....)))))))).	4944	4964	1	-20.6	1	0.0059711	0.529	0	0	-12.4965	14	20	8	3UTR		0	0
hsa-miR-221-3p	NM_181690	AKT3	AGCTACATTGTCTGCTGGGTTTC#AAGCACCAGCAGGCAC#........((((((((((((((.#)))).)))))))))).	1652	1668	1	-20.4	0	0.0245674	0.471	1.98601	3.44751	-19.4239	14	16	10	3UTR	MIRT562674	0	0
hsa-miR-221-3p	NM_181708	BCDIN3D	AGCTACATTGTCTGCTGGGTTTC#GAACCCGGGAGGCGGAGCTT#((((...((((((.((((((((.#)))))))).)))))))))).	1882	1902	1	-22.4	0	2.70747e-05	0.353	0	0	-12.3581	18	20	10	3UTR		0	0
hsa-miR-221-3p	NM_181713	UBXN2A	AGCTACATTGTCTGCTGGGTTTC#GAGACCAGCCTGGTCAATGTGGTG#.(((((((((.(((((.((((((#)))))))))..)).))))))))).	3315	3339	1	-22.9	1	0.000157436	0.574	2.6001	3.06361	-6.6181	20	24	9	3UTR		0	0
hsa-miR-221-3p	NM_181745	FFAR4	AGCTACATTGTCTGCTGGGTTTC#GATGCCTCTTAAGCACCAGCCATGGCAGACAGTGTC#....((((((((((((.((((..#.))))..)))))))))))).	2116	2152	1	-23.2	0	0.000582346	0.5	0.82457	0.129306	-9.54656	16	20	12	3UTR		0	0
hsa-miR-221-3p	NM_181782	NCOA7	AGCTACATTGTCTGCTGGGTTTC#GAATCCGGGAAGCAGAGGTTGTAGTG#.((((((.(.((((((((((((.#))))))....)))))).).)))))).	4505	4531	1	-21.6	1	0.00617285	0.485	0	0	-7.34947	19	26	6	3UTR		0	0
hsa-miR-221-3p	NM_181825	NF2	AGCTACATTGTCTGCTGGGTTTC#AGGCTGAGCAGAGATGTGGTC#.((((((((.((((((.(((((.#))))).)))))))))))))).	2796	2817	1	-23.3	1	0.000170175	0.515	0	0	-5.03583	19	21	14	3UTR		0	0
hsa-miR-221-3p	NM_181845	ZNF283	AGCTACATTGTCTGCTGGGTTTC#GAACCCGGGAGGCAGAGCTT#((((...((((((.((((((((.#)))))))).)))))))))).	5302	5322	1	-23.2	0	0.000685253	0.382	0	0	-12.3581	18	20	10	3UTR		0	0
hsa-miR-221-3p	NM_181865	ACOT7	AGCTACATTGTCTGCTGGGTTTC#GAACCCAGCACCACTAATAAAGCTG#((((..(((((.((((((((((.#))))))))))..)).)))..)))).	1402	1427	1	-20	0	0.00103475	0.481	-0.426022	-0.177181	-13.3044	19	25	10	3UTR		0	0
hsa-miR-221-3p	NM_181900	STARD5	AGCTACATTGTCTGCTGGGTTTC#GAGGCAGGAATACCAGTGTCAGTGTAGCC#.(((((((((.(.(((((..(((#.)))..)))))).))))))))).	2576	2605	1	-24.6	1	0.00747434	0.544	3.30174	3.06594	-7.90723	18	23	9	3UTR		0	0
hsa-miR-221-3p	NM_182507	KRT80	AGCTACATTGTCTGCTGGGTTTC#GGTCCCTCCCAGTAGGCAGTAGTC#.(((((..(((((((((((....#.)))))))))))))))).	2134	2158	1	-24.1	0	0.00010488	0.368	0	0	-7.65065	16	18	16	3UTR		0	0
hsa-miR-221-3p	NM_182515	ZNF714	AGCTACATTGTCTGCTGGGTTTC#GAACCCAGGAGGCAGAGGTTGCA#.((.((.((((((.((((((((.#)))))))).))))))..)).)).	6730	6753	1	-24.9	0	1.98083e-05	0.441	0	0	-9.22587	18	23	8	3UTR		0	0
hsa-miR-221-3p	NM_182522	TAFA4	AGCTACATTGTCTGCTGGGTTTC#TGCAGCAGACATGTC#....(((.(((((((((.(....#).)))))))))))).	1863	1878	1	-17.5	0	0.00525658	0.559	1.59442	2.64189	-11.8602	13	15	12	3UTR		0	0
hsa-miR-221-3p	NM_182527	CABP7	AGCTACATTGTCTGCTGGGTTTC#GAGGCTGGGCAGATGGTCTCGGAGCCTCCATGGGGCGTAGCA#.(((((((((((((((.((((((#)))))).))))))))))...................))))).	2610	2652	1	-24.2	1	0.000252656	0.382	0	0	-3.79332	21	42	10	3UTR		0	0
hsa-miR-221-3p	NM_182531	ZNF778	AGCTACATTGTCTGCTGGGTTTC#AACCCGGCAGGCAGGAACTCACCCTGGAGCCCTATGCAGCA#.(((.((((((((((((((((..#)))))))))))))....................))).))).	2648	2689	1	-24.7	0	0.00190489	0.412	0	0	-7.91236	19	41	13	3UTR		0	0
hsa-miR-221-3p	NM_182539	TCTE1	AGCTACATTGTCTGCTGGGTTTC#GAGACCTAGCTGACTGATTCAGGCTG#((((..((((((.((((((((((#)))))))))).))).)))...)))).	2639	2665	1	-22.3	0	0.00022953	0.397	0	0	-11.2467	20	26	10	3UTR		0	0
hsa-miR-221-3p	NM_182546	VSTM2A	AGCTACATTGTCTGCTGGGTTTC#GAAAATTTGCCTAGGAGGCGAATGTGGG#..(((((((((((.((((((...#.)))))).)))).))))))).	2283	2311	1	-23.5	1	1.86751e-07	0.544	0.439269	0.392071	-5.81384	17	21	7	3UTR		0	0
hsa-miR-221-3p	NM_182554	C10orf53	AGCTACATTGTCTGCTGGGTTTC#CCCACAGGCAACCTGTGGCA#.(((((((((((((.((((....#)))))))))))..)))))).	663	683	1	-23.3	1	1.76905e-05	0.441	0	0	-4.52877	17	20	11	3UTR		0	0
hsa-miR-221-3p	NM_182569	GDPD1	AGCTACATTGTCTGCTGGGTTTC#GAGACCTTTTTCAGGTGTGTAGCA#.(((((((..((((..(((((((#)))))))....)))).))))))).	2662	2686	1	-21.2	1	0.000756009	0.662	0	0	-7.06072	18	24	7	3UTR		0	0
hsa-miR-221-3p	NM_182614	TMEM255B	AGCTACATTGTCTGCTGGGTTTC#GGGACCCAGCGGGAGGTAATTGAATCATGGTGGCTG#((((((..(((((((((((((((#)))))))))))))............))..)))))).	4611	4647	1	-28.1	0	0.0133219	0.456	0	0	-7.7949	21	36	13	3UTR		0	0
hsa-miR-221-3p	NM_182625	GEN1	AGCTACATTGTCTGCTGGGTTTC#GAATTTATAGCACCCGGCAGAGGGATTGGCA#.((((..((.((((((((((...#.)))))))))).))..)))).	8504	8535	1	-24.3	0	2.74836e-05	0.456	0.251648	-0.0546793	-8.48048	16	21	10	3UTR		0	0
hsa-miR-221-3p	NM_182663	RASSF5	AGCTACATTGTCTGCTGGGTTTC#GGACATCTCTGGCAGGTGCATTTGTGCCTGCCCAGCAGTTCCAGCTGTGGCA#.(((((((((.(((((((((...#.)))))))))...))).)))))).	1411	1463	1	-27.1	1	0.000154065	0.485	0	0	-6.6181	18	24	9	3UTR		0	0
hsa-miR-221-3p	NM_182715	SYPL1	AGCTACATTGTCTGCTGGGTTTC#GAGACCCAGCCTCTTTGTAAGTA#.((((((..(...((((((((((#))))))))))..)..)))).)).	1629	1652	1	-21.1	1	0.0323077	0.603	0	0	-14.6241	17	23	10	3UTR		0	0
hsa-miR-221-3p	NM_182898	CREB5	AGCTACATTGTCTGCTGGGTTTC#AAACCCAGTGTTTCCATAGGGGCACTTTTAGCC#.((((...((((((((((((((.#)))))))))..........)))))....)))).	3149	3182	1	-18.8	0	0.000222525	0.559	0.0627737	0.294452	-9.55161	18	33	9	3UTR		0	0
hsa-miR-221-3p	NM_182948	PRKACB	AGCTACATTGTCTGCTGGGTTTC#TTCAGATGGGCAGTGTTATGGCTA#(((((((((((((((((((....#))))).))))))))))...)))).	1619	1643	1	-18.7	1	6.39743e-05	0.618	3.82995	2.96277	-3.93757	19	24	10	3UTR		0	0
hsa-miR-221-3p	NM_183079	PRNP	AGCTACATTGTCTGCTGGGTTTC#ACCTAGCAGATATGTAT#...((((.((((((((((((...#)))))))))))))))).	2030	2047	1	-21.8	0	0.00208059	0.662	0.449032	0.589227	-8.82818	16	17	16	3UTR		0	0
hsa-miR-221-3p	NM_183238	ZNF605	AGCTACATTGTCTGCTGGGTTTC#GAGGCCCAGCAGAGGGCAGCA#.(((...((.(((((((((((((#))))))))))))).)).))).	5756	5777	1	-27.2	0	5.98499e-05	0.5	0	0	-12.5995	18	21	13	3UTR		0	0
hsa-miR-221-3p	NM_183397	PXMP4	AGCTACATTGTCTGCTGGGTTTC#GGACCCAGTAGCCACATGTGGCTA#((((((((((.(((((((((((.#))))))))))).)).)))))))).	1491	1515	1	-28.8	1	3.32624e-07	0.456	5.80595	5.68075	-6.76235	21	24	11	3UTR		0	0
hsa-miR-221-3p	NM_194247	HNRNPA3	AGCTACATTGTCTGCTGGGTTTC#AACTGCAGCAGAAATGTAGCA#.((((((((.(((((((((((..#)))).))))))))))))))).	2472	2493	1	-24.3	1	0.00171073	0.588	0.957032	1.27845	-5.03583	19	21	15	3UTR		1	0
hsa-miR-221-3p	NM_194286	SRRM4	AGCTACATTGTCTGCTGGGTTTC#GAGCCCAGCAGATCCCAGCTG#((((.....(((((((((((((.#)))))))))))))...)))).	2885	2906	1	-25	0	7.57262e-05	0.426	0.982512	1.08005	-14.8713	17	21	13	3UTR		0	0
hsa-miR-221-3p	NM_194358	RNF41	AGCTACATTGTCTGCTGGGTTTC#GAACCCGGGAGGCAGAGCTT#((((...((((((.((((((((.#)))))))).)))))))))).	4110	4130	1	-23.2	0	0.00132291	0.412	0	0	-12.3581	18	20	10	3UTR		0	0
hsa-miR-221-3p	NM_194429	CEP43	AGCTACATTGTCTGCTGGGTTTC#GAAGCCTGGATGGGCAACTTGGCTG#(((((..((((((((((((((((#))))))))).)))))))..))))).	8539	8564	1	-23.5	0	0.000169143	0.544	0	0	-7.38222	21	25	9	3UTR		0	0
hsa-miR-221-3p	NM_194439	RNF212	AGCTACATTGTCTGCTGGGTTTC#TCCAGCAGGCTGAGGGCA#.(((.....((((((((((....#))))))))))....))).	846	864	1	-21.3	0	1.39477e-05	0.397	3.15892	2.73715	-14.727	13	18	10	3UTR		0	0
hsa-miR-221-3p	NM_197965	SLC10A6	AGCTACATTGTCTGCTGGGTTTC#GGACTGGCCCCCTTCTTTTTCAGTGGCCAGTAAAGACAGTGTGCAGCTG#((((((((((((((((((.(...#.).)))))..)))))))))..)))).	1419	1468	1	-22.6	1	0.000696342	0.515	0	0	-3.93757	19	26	9	3UTR		0	0
hsa-miR-221-3p	NM_197970	BOLL	AGCTACATTGTCTGCTGGGTTTC#GCTCAGCAGCAGCAGCA#.(((...(((.(((((((((...#)))))))))))).))).	2361	2378	1	-19	0	0.00134796	0.574	4.75877	4.61735	-14.1818	15	17	12	3UTR		0	0
hsa-miR-221-3p	NM_198053	CD247	AGCTACATTGTCTGCTGGGTTTC#GAAGACCCAACACATGGGACCTATAACTGCCCAGCGGACAGTGGCA#.(((((..((((((((((((...#.))))))))))))))))).	1389	1435	1	-29.7	0	0.000318003	0.471	2.80134	2.96326	-7.65065	17	19	17	3UTR		0	0
hsa-miR-221-3p	NM_198074	OR2C3	AGCTACATTGTCTGCTGGGTTTC#ACCCAGCAGACCTGGCG#.((((....(((((((((((...#))))))))))).)))).	7856	7873	1	-24.1	0	0.000129734	0.529	0	0	-10.608	15	17	11	3UTR		0	0
hsa-miR-221-3p	NM_198186	ASTN2	AGCTACATTGTCTGCTGGGTTTC#GGGCCTAGCAGATGAAGCTT#((((...(((((((((((((((.#))))))))))))))))))).	1835	1855	1	-22.9	0	0.000536604	0.426	1.35055	2.23099	-11.5013	19	20	19	3UTR		0	0
hsa-miR-221-3p	NM_198276	TMEM17	AGCTACATTGTCTGCTGGGTTTC#GAACCCAGGAGGCAGAGCTT#((((...((((((.((((((((.#)))))))).)))))))))).	1327	1347	1	-23.9	0	0.00057259	0.441	3.99695	3.75765	-12.3581	18	20	10	3UTR		0	0
hsa-miR-221-3p	NM_198291	SRC	AGCTACATTGTCTGCTGGGTTTC#AGCTACGGCAGAATGTGGCTG#((((((((..(((((((((((..#)))).))))))))))))))).	4161	4182	1	-22.3	1	9.31068e-08	0.5	-0.698804	-0.382074	-6.23647	19	21	15	3UTR		0	0
hsa-miR-221-3p	NM_198321	GALNT10	AGCTACATTGTCTGCTGGGTTTC#AGCTCAGCAGAGGCTGTGGTA#.((((((.(.(((((((((((..#))))))))))).).)))))).	3182	3203	1	-25.6	1	5.08761e-05	0.412	-0.149864	-0.0729684	-7.34947	18	21	11	3UTR		0	0
hsa-miR-221-3p	NM_198391	FLRT3	AGCTACATTGTCTGCTGGGTTTC#GATAGCTGGCAGGCCCTAGGTAGCTT#((((((...(((((((((.(.((#)).).))))))))).....)))))).	4295	4321	1	-21.7	0	0.00038515	0.574	4.83087	5.01371	-8.85129	18	26	9	3UTR		0	0
hsa-miR-221-3p	NM_198402	HACD2	AGCTACATTGTCTGCTGGGTTTC#GAAGTCGTACCAGCTGAATAGCCCAGCTTGCAGTATAGTTA#(((((.(((((..((((((((..#.))))))))..))))).))))).	1148	1189	1	-23.4	0	0.000238329	0.559	0.0554146	0.085736	-10.4745	18	23	8	3UTR		0	0
hsa-miR-221-3p	NM_198407	GHSR	AGCTACATTGTCTGCTGGGTTTC#GAACACTAGCAAGCTGATTATGTAGTTA#((((((((.(((((((((((((.#)))).))))))....))).)))))))).	2960	2988	1	-20	1	0.0070466	0.692	1.15258	-0.13107	-4.99396	21	28	8	3UTR		0	0
hsa-miR-221-3p	NM_198435	AURKA	AGCTACATTGTCTGCTGGGTTTC#ACTCAGCAGGTGTGCC#.((.((((...(((((((((...#))))))))))))))).	1408	1424	1	-17.8	0	9.5629e-05	0.588	5.52381	4.12587	-11.949	15	16	15	3UTR		0	0
hsa-miR-221-3p	NM_198440	DERL3	AGCTACATTGTCTGCTGGGTTTC#CCCAGCTGGCAGTAGCC#.(((((..((((.((((((....#)))))).))))))))).	2785	2802	1	-23.1	0	9.56006e-08	0.353	0	0	-8.93978	15	17	9	3UTR		0	0
hsa-miR-221-3p	NM_198461	LONRF2	AGCTACATTGTCTGCTGGGTTTC#GAGGCCCAGCAGACCACACCGGGCC#.(((.....((((((((((((((#)))))))))))))).......))).	7020	7045	1	-27.6	0	2.37784e-05	0.426	0.15553	0.0319256	-14.727	17	25	14	3UTR		0	0
hsa-miR-221-3p	NM_198510	ITIH6	AGCTACATTGTCTGCTGGGTTTC#GAGACCCAAGGACATGGAAGCA#.(((.(..(((((..((((((((#)))))))).)))))..).))).	4063	4085	1	-23.1	0	0.00934109	0.412	2.43989	2.44896	-13.362	17	22	8	3UTR		0	0
hsa-miR-221-3p	NM_198511	LANCL3	AGCTACATTGTCTGCTGGGTTTC#GGGCCTAGTAGTCAGATCACAAGTGAGTGTGGCTA#((((((((((.(((((((((((.#))))))))))).))............)))))))).	5902	5937	1	-24.2	1	1.27799e-05	0.529	0	0	-6.76235	21	35	11	3UTR		0	0
hsa-miR-221-3p	NM_198562	C3orf62	AGCTACATTGTCTGCTGGGTTTC#GAAGCCTGGCAGACACCTAACCAAGTGATGTCATGTAT#...((((((((((((((((((((#))))))))))))))).................))))).	3092	3130	1	-24.3	0	0.000566653	0.5	0	0	-6.51454	20	38	15	3UTR		0	0
hsa-miR-221-3p	NM_198569	ADGRG6	AGCTACATTGTCTGCTGGGTTTC#GAAGCTATTTGCCTGGCTCCAGCAGATGATGAGA#..((.((((((((((((((((..#.))).))))))))))))))).	5657	5691	1	-23.5	0	0.00792147	0.588	0	0	-9.07604	18	21	15	3UTR		0	0
hsa-miR-221-3p	NM_198834	ACACA	AGCTACATTGTCTGCTGGGTTTC#AGCCCAGCACACAGTAGGCA#.(((..(((((.(((((((((..#))))))))).))))).))).	8181	8201	1	-22.6	0	0.0013279	0.515	0	0	-13.1601	17	20	9	3UTR		0	0
hsa-miR-221-3p	NM_198841	FAM120AOS	AGCTACATTGTCTGCTGGGTTTC#GCCTGAGGGGCGTTCCTTTTGGCAAAATGAGCAGGCAGTGTAGG#..((((((((((((((.(.....#.).)))))))))))))).	5333	5377	1	-23.6	1	0.00161151	0.5	0	0	-4.957	15	18	14	3UTR		0	0
hsa-miR-221-3p	NM_198925	SEMA4B	AGCTACATTGTCTGCTGGGTTTC#GCCAGTCAGCCGAGGATGTAGTTG#(((((((((.((.(((((((...#)))...)))).)).))))))))).	3285	3309	1	-21.7	1	0.000249268	0.382	-0.404465	0.195236	-6.46921	18	24	9	3UTR		0	0
hsa-miR-221-3p	NM_198990	NAPEPLD	AGCTACATTGTCTGCTGGGTTTC#AAGCCCTCTCCTTAGCTGAGCAGAGGAAGGGAAGGAGTGTGGCTA#(((((((((.((((((.((((..#.)))).)))))).)..........)))))))).	2267	2312	1	-23.2	1	0.00177619	0.574	0	0	-5.18008	19	33	8	3UTR		0	0
hsa-miR-221-3p	NM_198992	SYT10	AGCTACATTGTCTGCTGGGTTTC#AAACCCAGTCAGAAGCTC#((((......((((((((((((.#)))))))).)))))))).	2882	2900	1	-18.3	0	0.0328333	0.647	0	0	-16.1138	16	18	8	3UTR		1	1
hsa-miR-221-3p	NM_199044	NSUN4	AGCTACATTGTCTGCTGGGTTTC#GATCCCAGGAATTCTAGATCAGCTTGGACAATGTAGTG#.(((((((((((((((((.....#.)))))..)))))))))))).	3416	3454	1	-22.8	1	0.0160105	0.632	0	0	-3.79332	17	21	12	3UTR		1	0
hsa-miR-221-3p	NM_199050	C2CD2	AGCTACATTGTCTGCTGGGTTTC#TCCAGTAGACATGCTGGTC#.((((((.(((((((((((....#))))))))))))).)))).	3074	3093	1	-20.9	1	2.64812e-06	0.529	0	0	-6.10696	17	19	13	3UTR		0	0
hsa-miR-221-3p	NM_199076	CNNM2	AGCTACATTGTCTGCTGGGTTTC#GGGGTCCGGCAGAGAAAGACCGTGGAATAGCTGCGGTCTCGATGTGGCTG#(((((((((((((((((((((((#)))))))))))))..........................)))))))))).	5583	5633	1	-25.9	1	0.000178069	0.397	0	0	-3.93757	23	50	13	3UTR		0	0
hsa-miR-221-3p	NM_199351	ILDR2	AGCTACATTGTCTGCTGGGTTTC#GACCAAGCAGGCAAAAGGCTT#((((...(((((((((.((((..#)))).)))))))))..)))).	12330	12351	1	-21	0	0.000387553	0.559	0	0	-11.5013	17	21	9	3UTR		0	0
hsa-miR-221-3p	NM_199367	SPG7	AGCTACATTGTCTGCTGGGTTTC#GAAGCCCAGCGGTTCACACAGGCCTCCCTTCAACGTAGTC#.(((((.(((.((((((((((((#))))))))))))..................))).))))).	1985	2025	1	-23.9	0	0.0625549	0.397	0	0	-8.16179	20	40	12	3UTR		0	0
hsa-miR-221-3p	NM_199440	HSPD1	AGCTACATTGTCTGCTGGGTTTC#GAAGCCCAAGGCAGTGTTCCTC#((..(((((((((..((((((((#)))))))))))))))))..)).	1881	1903	1	-22.4	0	0.00494264	0.544	0	0	-10.1194	19	22	17	3UTR		0	0
hsa-miR-221-3p	NM_199454	PRDM16	AGCTACATTGTCTGCTGGGTTTC#GCCATGCAGAGATGTGGCC#.((((((((.(((((..(((...#)))..))))))))))))).	4766	4785	1	-22.8	1	7.76573e-06	0.368	0	0	-5.26888	16	19	13	3UTR	MIRT046957	0	0
hsa-miR-221-3p	NM_201453	CBWD3	AGCTACATTGTCTGCTGGGTTTC#CAGCATACATAAAATGTAGCA#.((((((((((.(((((......#))))).)))....))))))).	1362	1383	1	-18.4	1	0.00964794	0.75	0	0	-7.14013	15	21	7	3UTR		0	1
hsa-miR-221-3p	NM_201567	CDC25A	AGCTACATTGTCTGCTGGGTTTC#GAAAGCTAGGTGCTCTGTCACCCCCAGGAGGCGCTGTGGTA#.((((((.(((((.(((((....#.))))).))))).)))))).	2550	2591	1	-25.1	1	5.16474e-05	0.426	0	0	-6.9638	16	20	6	3UTR		0	0
hsa-miR-221-3p	NM_201595	GTF2A1	AGCTACATTGTCTGCTGGGTTTC#AAATTCAGCAGTGCTGCAGTGTTGCTT#(((.((((((((((((((((((.#)))))))))))....))))))).))).	3320	3347	1	-23.2	0	0.000328053	0.618	0	0	-6.9696	21	27	11	3UTR		0	0
hsa-miR-221-3p	NM_201628	KAZN	AGCTACATTGTCTGCTGGGTTTC#GGACCTGGGGACGATGTGGA#..(((((((((((.((((((((.#))))))))))))))))))).	5292	5312	1	-23.6	1	0.000422058	0.456	0	0	-5.81384	19	20	19	3UTR		0	0
hsa-miR-221-3p	NM_201651	SLC28A1	AGCTACATTGTCTGCTGGGTTTC#TCCAGGGGATTCTGATGTAGCC#.((((((((((((.(((((....#))))).))))...)))))))).	832	854	1	-22.6	1	0.000380822	0.529	0	0	-4.65016	17	22	8	3UTR		0	0
hsa-miR-221-3p	NM_203329	CD59	AGCTACATTGTCTGCTGGGTTTC#AAACAAGGTAGACAGTGTCTACCACCATAGTGGCCATACCAAAGAGGCTA#((((((((((((((((..((((.#))))..))))))))))))...........................)))).	5227	5277	1	-21.3	1	0.00219397	0.471	0	0	-3.93757	20	50	12	3UTR		0	0
hsa-miR-221-3p	NM_203341	SELENOF	AGCTACATTGTCTGCTGGGTTTC#GGAACACAGACAGTGTAGA#..((((((((((((....(((((#))))).)))))))))))).	410	429	1	-19.9	1	0.0057381	0.588	0	0	-5.9255	17	19	12	3UTR		0	0
hsa-miR-221-3p	NM_203343	EPB41	AGCTACATTGTCTGCTGGGTTTC#GAGCCCTCTGCTGAGAATGTAGTA#.((((((((.((.((.((((((.#))))))...)).)).)))))))).	3044	3068	1	-23	1	0.00147097	0.515	0	0	-6.55801	18	24	8	3UTR		0	0
hsa-miR-221-3p	NM_203371	FIBIN	AGCTACATTGTCTGCTGGGTTTC#ATCCTGCAGATTATGTGGA#..((((((.((((((.((((...#)))).)))))).)))))).	1402	1421	1	-20.6	1	0.00037673	0.574	0	0	-6.24644	16	19	6	3UTR		0	0
hsa-miR-221-3p	NM_203390	RBM12B	AGCTACATTGTCTGCTGGGTTTC#AAACCAGAGTCAGATTGAATGTAGCTT#((((((((((((((((.(((((.#)))))..)).)))))..))))))))).	7711	7738	1	-21.6	1	0.00823046	0.691	0	0	-3.93757	21	27	9	3UTR		0	0
hsa-miR-221-3p	NM_203391	GK	AGCTACATTGTCTGCTGGGTTTC#GACCCTCCAAGTAGACCTGTGGCTT#(((((((..((((((((((((..#)))))....))))))).))))))).	1835	1860	1	-23.3	1	0.00238638	0.574	0	0	-7.3076	19	25	7	3UTR		0	0
hsa-miR-221-3p	NM_203394	E2F7	AGCTACATTGTCTGCTGGGTTTC#AACCTAGTAATAATGTGGA#..(((((((((.(((((((((..#)))))))))))))))))).	3568	3587	1	-20.8	1	9.04415e-05	0.662	0	0	-8.3038	18	19	18	3UTR		0	0
hsa-miR-221-3p	NM_203395	IYD	AGCTACATTGTCTGCTGGGTTTC#GAGGTCCAGAAGAAATGTGGCTT#(((((((((.(((.(((((((((#))))))))).)))))))))))).	6001	6024	1	-22	1	7.35191e-05	0.544	0	0	-6.03692	21	23	12	3UTR		0	0
hsa-miR-221-3p	NM_203422	LRRN4CL	AGCTACATTGTCTGCTGGGTTTC#GACCCCCTTCTTTAAAGATGTAAAACCCGGCCGGGCGCGGTGGCTC#((((((..((((((((((((((.#.))))))))).)))))..)))))).	1621	1667	1	-27.2	0	4.06493e-06	0.426	0	0	-7.7949	20	25	9	3UTR		0	0
hsa-miR-221-3p	NM_203451	SERTM1	AGCTACATTGTCTGCTGGGTTTC#GAGTATGTCTGAACTCGGCGGGCGGGTGGCA#.(((((.(((((((((((((((.#.)))))))))))))))))))).	1849	1880	1	-28.7	0	9.03151e-06	0.412	0	0	-5.33701	20	22	20	3UTR		0	0
hsa-miR-221-3p	NM_205847	GMPPA	AGCTACATTGTCTGCTGGGTTTC#GCCGGGGAGCAATGTGGA#..((((((((.((.((.(((...#))).)).)))))))))).	1753	1771	1	-20.7	1	5.2492e-05	0.382	0	0	-8.63862	15	18	10	3UTR		0	0
hsa-miR-221-3p	NM_205861	DHDDS	AGCTACATTGTCTGCTGGGTTTC#GAAAGGTACACAGGGTGGAGTAGGGAGAAGCTGCCCCAGGAGGCGATGTAGTG#.((((((((((((.(((((....#.))))).)))))))))))).	2990	3043	1	-29.2	1	0.0211751	0.412	0	0	-4.65016	17	20	12	3UTR		0	0
hsa-miR-221-3p	NM_206831	DPH3	AGCTACATTGTCTGCTGGGTTTC#GGAGCAAAGCATACCAGTGTAGTA#.(((((((((..((((..(((((#)))))..))))...))))))))).	1089	1113	1	-20.9	1	0.000416088	0.559	-0.0557052	-0.190726	-9.9649	18	24	9	3UTR		0	0
hsa-miR-221-3p	NM_206853	QKI	AGCTACATTGTCTGCTGGGTTTC#GACACACCTGTGTAGGAGGCCAAGACTTGGCAGAGGATGTAGTC#.((((((((.((((((((((((.#.)))))))))))).)))))))).	4345	4389	1	-28.1	1	0.000169284	0.529	0	0	-5.03583	20	23	12	3UTR		1	0
hsa-miR-221-3p	NM_206895	SNORC	AGCTACATTGTCTGCTGGGTTTC#GGAGGCCAGCAGACCCCTTGGGGACAGCTTAATGTATCTG#((.(((((((((((((((.((((#)))).)))))))))................)))))).)).	1584	1624	1	-23.2	0	0.0183347	0.471	0	0	-5.49511	21	40	9	3UTR		0	0
hsa-miR-221-3p	NM_206909	PSD3	AGCTACATTGTCTGCTGGGTTTC#GAAGCTTAGGGGACAGTAAAGTGGTTG#(((((((((((((.(((((((((#))))))))).)))))))...)))))).	7780	7807	1	-25.1	1	0.000125585	0.574	0	0	-4.79441	22	27	9	3UTR		0	0
hsa-miR-221-3p	NM_206918	DEGS2	AGCTACATTGTCTGCTGGGTTTC#GGAGCCGGCCCTTGAGATCAGCCACTGGGTCCCAGCAGGCAGTGCCGGCTC#((((.((((((((((((((.(((#.))).))))))))))))))..)))).	2888	2939	1	-29.2	0	2.95368e-06	0.294	0	0	-8.05661	21	26	14	3UTR		0	0
hsa-miR-221-3p	NM_207015	NAALADL2	AGCTACATTGTCTGCTGGGTTTC#GAAGCTTAGCTAGAGAAGTGGA#..((((.((.(((((((((((((#)))))))))).))).)))))).	8085	8107	1	-20.7	0	0.00350867	0.618	0	0	-7.74319	19	22	10	3UTR		0	0
hsa-miR-221-3p	NM_207042	ENSA	AGCTACATTGTCTGCTGGGTTTC#GAGCTCTGTAGATAAATGCCTTGTTTCAGTGTGGTTG#(((((((((((((((.((((((.#)))))).)))))..............)))))))))).	979	1016	1	-20.1	1	0.000628045	0.574	0.606058	0.669058	-4.17062	21	37	10	3UTR		0	0
hsa-miR-221-3p	NM_207122	EXT2	AGCTACATTGTCTGCTGGGTTTC#GGCCTACAGCAGACAACAGCTG#((((...((((((((((((((..#))))..)))))))))).)))).	4961	4983	1	-22.5	0	0.0001011	0.662	0	0	-11.5013	18	22	10	3UTR		0	0
hsa-miR-221-3p	NM_207299	PLPPR1	AGCTACATTGTCTGCTGGGTTTC#GAGCTGCAGGAAGGACAATGTTGGTTA#(((((((((((((.((((((((.#))))).)))...))))))))).)))).	1817	1844	1	-18.6	1	0.0126252	0.662	0	0	-4.79441	21	27	9	3UTR		1	1
hsa-miR-221-3p	NM_207327	CDPF1	AGCTACATTGTCTGCTGGGTTTC#GGAGTCCAGCTTGGAGCAGCCACAGGCCCAGGGAGCTGTAGCA#.((((((...(((.((((((((.#.)))))))))))..)))))).	553	596	1	-21.9	1	0.000174863	0.397	0	0	-9.2627	17	21	11	3UTR		0	0
hsa-miR-221-3p	NM_207335	KBTBD12	AGCTACATTGTCTGCTGGGTTTC#GAAGCAACGCCACCCAGCAGCAGGGCTAGCTG#((((((.(((.(((((((((...#.)))))))))))).).))))).	2998	3030	1	-25.2	0	1.79042e-06	0.441	0	0	-8.30604	18	22	12	3UTR		0	0
hsa-miR-221-3p	NM_207359	GADL1	AGCTACATTGTCTGCTGGGTTTC#GGGATTCAGCAGACTTTCAGTGTAAATGCTT#(((((((((((((((((((((((#))))))))))))))....))))))...))).	2939	2970	1	-23.9	1	0.00223851	0.559	0	0	-3.93757	23	31	14	3UTR		0	0
hsa-miR-221-3p	NM_207393	IGFL3	AGCTACATTGTCTGCTGGGTTTC#GGAGCCCAGCTGGGGATGGCC#.((..((((.((.((((((((((#)))))))))).)).)))))).	552	573	1	-23.9	0	1.27591e-05	0.441	0	0	-13.476	18	21	10	3UTR		0	0
hsa-miR-221-3p	NM_207577	MAP6	AGCTACATTGTCTGCTGGGTTTC#GAGACCCAAGGGGGCGTAGATGTAGTG#.((((((((((((.(((((((((#)))))))).).))))...)))))))).	2266	2293	1	-25.8	1	1.98643e-07	0.485	0.043995	0.140209	-4.65016	21	27	8	3UTR		0	0
hsa-miR-221-3p	NM_207582	ERVFRD-1	AGCTACATTGTCTGCTGGGTTTC#GAGACCCAGTTGCTTGCAGTTTGGCC#.((((.(((((..((((((((((#)))))))))).....))))).)))).	3115	3141	1	-23.2	0	0.000176103	0.5	0	0	-10.3302	19	26	10	3UTR		0	0
hsa-miR-221-3p	NM_207660	ZC3H14	AGCTACATTGTCTGCTGGGTTTC#GAACCCAGGAGGCACAGGTTGTGGTGAGCTG#((((.((((((((.((((((((.#)))))))).))))).........))))))).	9369	9400	1	-24.4	0	0.000994894	0.456	0	0	-8.91345	20	31	8	3UTR		0	0
hsa-miR-221-3p	NM_212555	PATE2	AGCTACATTGTCTGCTGGGTTTC#TGATAATGTGGCAGGTGGTGTAGTA#.((((((((((((((((.(((..#.))).)))))))))))))))).	1183	1208	1	-20.8	1	0.00556436	0.647	0	0	-3.79332	19	22	16	3UTR		0	0
hsa-miR-221-3p	NM_212559	XKRX	AGCTACATTGTCTGCTGGGTTTC#CCCAGGAAACAGTCTGACTAATGTGGAACCTGCAACTGTCAGTGTGGCTG#((((((((((.((((.(((((((#.))))))))))...).)))))))))).	2392	2442	1	-24.4	1	9.8217e-05	0.529	0	0	-6.9954	21	27	10	3UTR		0	0
hsa-miR-221-3p	NM_213566	DFFA	AGCTACATTGTCTGCTGGGTTTC#GAAACCCGGCATTTCAGTGTAA#...(((((((..(((((((((((#)))))))))))...))))))).	2074	2096	1	-25.1	0	0.00652278	0.588	0	0	-12.6861	18	22	11	3UTR		0	0
hsa-miR-221-3p	NM_213568	SLC39A3	AGCTACATTGTCTGCTGGGTTTC#GATGCCTGGGGACATTGTGGTTG#(((((((.(((((.((((((.((#)).))))))))))).))))))).	2799	2822	1	-22.4	1	8.81363e-05	0.353	0	0	-7.10805	20	23	11	3UTR		0	0
hsa-miR-221-3p	NM_213621	HTR3A	AGCTACATTGTCTGCTGGGTTTC#AGCCCAGTGGAGGAGGGGGTA#.(((...((.(((((((((((..#))))))))))).))...))).	1759	1780	1	-21.6	0	0.000374045	0.412	0	0	-12.5995	16	21	11	3UTR		0	0
hsa-miR-221-3p	NM_213654	ARMC8	AGCTACATTGTCTGCTGGGTTTC#GGAGCCATAGCAGAAAGAGCA#.(((......(((((((((((((#)))))).)))))))...))).	2350	2371	1	-19.5	0	0.0639459	0.618	0.353433	0.439152	-15.9695	16	21	7	3UTR		0	0
hsa-miR-221-3p	NM_213657	KLRC1	AGCTACATTGTCTGCTGGGTTTC#AAACCCATGGAGACAGAAAGTAGA#..((((.((((((.((((((((.#))))))).).))))))...)))).	1314	1338	1	-21.2	0	0.0414305	0.544	-0.158056	-0.0678594	-7.35753	18	24	7	3UTR		0	0
hsa-miR-221-3p	XM_005245393	PRUNE1	AGCTACATTGTCTGCTGGGTTTC#GGACTCAGCCTCATGTAGCA#.((((((.((...(((((((((.#)))))))))..)))))))).	2539	2559	1	-20.4	1	0.0114367	0.485	0	0	-13.5677	17	20	9	3UTR		1	1
hsa-miR-221-3p	XM_005246337	METTL21A	AGCTACATTGTCTGCTGGGTTTC#AGCCTGGGGGACAAGAGCG#.(((.(.((((((.(((((((..#))))))).)))))))))).	1767	1786	1	-20.7	0	0.00120658	0.588	0	0	-10.3129	17	19	10	3UTR		0	0
hsa-miR-221-3p	XM_005246720	USP37	AGCTACATTGTCTGCTGGGTTTC#GAATCACTTGAACCCAGGAGGCAGAGGTTGCA#.((.((.((((((.((((((((.#.)))))))).))))))..)).)).	4984	5016	1	-25.3	0	0.000188318	0.485	0	0	-9.22587	18	24	8	3UTR		0	0
hsa-miR-221-3p	XM_005246966	PPIG	AGCTACATTGTCTGCTGGGTTTC#GCCTAGTGGAAGGTATGGAGCTA#((((.(((..((((((((((...#))))))))))....))).)))).	5402	5425	1	-19.8	0	0.00981357	0.647	0	0	-10.3555	17	23	10	3UTR		0	0
hsa-miR-221-3p	XM_005248299	IL7R	AGCTACATTGTCTGCTGGGTTTC#ACCTAGGGACAATGTGT#...((((((((((.((((((...#)))))))))))))))).	3899	3916	1	-20.3	0	0.0445649	0.662	0	0	-7.37138	16	17	16	3UTR		0	0
hsa-miR-221-3p	XM_005248551	WDR41	AGCTACATTGTCTGCTGGGTTTC#GAGGCCCAGTGCAGTAAGGCC#.(((..(((((..((((((((((#)))))))))))))))..))).	2651	2672	1	-22.1	0	9.12244e-06	0.544	0	0	-14.4493	18	21	15	3UTR		0	0
hsa-miR-221-3p	XM_005248979	MTCH1	AGCTACATTGTCTGCTGGGTTTC#GAGCTCTTGGGCCCAGCAGTCAGGGGTCCAGGCTT#((((((.(((.(((((((((((.#.))))))))))).)))..))...)))).	2585	2620	1	-24.4	0	0.000505886	0.368	0	0	-8.30604	20	28	11	3UTR		0	0
hsa-miR-221-3p	XM_005249759	OGDH	AGCTACATTGTCTGCTGGGTTTC#GGGCCCAGGCAGCACCTGGAGCCCACAGAGTCTGTGTGTAGCC#.(((((((..((((.((((((((#.))))))))))))......))))))).	3889	3932	1	-24.5	1	0.00134468	0.338	0	0	-6.82767	19	27	12	3UTR		0	0
hsa-miR-221-3p	XM_005251515	CBWD1	AGCTACATTGTCTGCTGGGTTTC#CAGCATACATAAAATGTAGCA#.((((((((((.(((((......#))))).)))....))))))).	1275	1296	1	-18.4	1	0.0097275	0.75	0	0	-7.14013	15	21	7	3UTR		0	1
hsa-miR-221-3p	XM_005252916	RHOG	AGCTACATTGTCTGCTGGGTTTC#GAGGCCTGCAGAGAAAGGGGCTT#((((.(.((.(((((.(((((((#)))))))))))).)).).)))).	1071	1094	1	-21.3	0	9.17373e-08	0.426	0	0	-11.0759	19	23	12	3UTR		0	0
hsa-miR-221-3p	XM_005253623	TCTN2	AGCTACATTGTCTGCTGGGTTTC#ACCTCAGCCTCTGGTGTAGCTG#((((((((((...(((((((...#))).))))...)))))))))).	2487	2509	1	-20.4	1	0.000116961	0.397	0	0	-11.3983	17	22	10	3UTR		0	0
hsa-miR-221-3p	XM_005253889	OAS3	AGCTACATTGTCTGCTGGGTTTC#GAGACCTGCTCTGCCAAGTTGTCCAGCAGCAGAGTGGCC#.(((((.(((.((((((((....#.))))))))))).))))).	5401	5440	1	-24	0	0.000349512	0.382	0	0	-8.16179	16	19	11	3UTR		0	0
hsa-miR-221-3p	XM_005254232	FAN1	AGCTACATTGTCTGCTGGGTTTC#GGAACCCAGCGGAAGTAGCA#.(((((....(((((((((((((#))))))))))))).))))).	3597	3617	1	-27.9	0	0.00741261	0.456	0	0	-9.94954	18	20	13	3UTR		0	0
hsa-miR-221-3p	XM_005254680	WDR76	AGCTACATTGTCTGCTGGGTTTC#GGAGCCTAGTAATCGGCGTGCCTTAGTGTGTTTATGTGGTA#.((((((((((((((((((((((#)))))))))))...))))...............))))))).	2010	2051	1	-20.6	1	0.000636734	0.632	0	0	-3.79332	22	41	11	3UTR		0	0
hsa-miR-221-3p	XM_005256248	ADGRG1	AGCTACATTGTCTGCTGGGTTTC#GCCCCTGCCTGGGACAGAAATGTGGCTC#(((((((((((((((.((((...#))))..))...)))))...)))))))).	2835	2863	1	-21	1	1.9807e-05	0.426	0	0	-4.17062	19	28	8	3UTR		0	0
hsa-miR-221-3p	XM_005258271	MBD1	AGCTACATTGTCTGCTGGGTTTC#GATCTAGCAGATACATGGCA#.((((...(((((((((((((..#)))))))))))))..)))).	3955	3975	1	-21.3	0	0.0127221	0.441	0	0	-9.55161	17	20	13	3UTR		0	0
hsa-miR-221-3p	XM_005258915	ZNF324B	AGCTACATTGTCTGCTGGGTTTC#ACCTGTGGAGACAGTGATAGCTT#(((((((((((((.((((((...#))))).).)))))))).))))).	2672	2695	1	-22.3	1	0.00246517	0.5	0	0	-4.79441	19	23	8	3UTR		0	0
hsa-miR-221-3p	XM_005258944	ZNF772	AGCTACATTGTCTGCTGGGTTTC#GAGCCCAGCCGATGTGGTTT#((((((((((...(((((((((.#))))))))))))))))))).	6060	6080	1	-24.8	1	0.000362585	0.529	0	0	-11.3983	19	20	19	3UTR		0	0
hsa-miR-221-3p	XM_005260908	OLIG2	AGCTACATTGTCTGCTGGGTTTC#GCCCCTCGCAGAGAGTGTATCA#.(.((((((.(((((.((((...#))))...))))).)))))).).	2589	2611	1	-20.9	0	0.000329748	0.559	0	0	-6.82642	16	22	6	3UTR		0	0
hsa-miR-221-3p	XM_005261160	AGPAT3	AGCTACATTGTCTGCTGGGTTTC#ACTCGGCGACAGTGTACCA#.(.(((((((((.(((((((...#)))))))))))))))).).	4213	4232	1	-21.4	0	0.00151645	0.456	0	0	-6.63999	17	19	16	3UTR		0	0
hsa-miR-221-3p	XM_005262769	PAQR3	AGCTACATTGTCTGCTGGGTTTC#AAACCTAAAATAAACCAAGCAGAGTAGCTG#((((((....((((((.(((((.#.))))).)))))))))))).	1115	1145	1	-21.3	0	0.000979745	0.588	0	0	-10.0938	17	20	12	3UTR		0	0
hsa-miR-221-3p	XM_005262774	THAP6	AGCTACATTGTCTGCTGGGTTTC#GAGACCCAGAGACTTTGA#.....((..((((.(((((((((#)))))))))))))..)).	929	947	1	-21.6	0	0.00838501	0.662	0	0	-17.8925	15	18	13	3UTR		0	0
hsa-miR-221-3p	XM_005264293	KCNK3	AGCTACATTGTCTGCTGGGTTTC#CCCAGCTGACAGTGG#.....(((((((.((((((....#)))))).))))))).	4318	4333	1	-22.7	0	2.40221e-05	0.412	0	0	-14.9547	13	15	7	3UTR		0	0
hsa-miR-221-3p	XM_005264383	TMEM214	AGCTACATTGTCTGCTGGGTTTC#GGGCCCAGCAGCATCTCAGCC#.(((....((.(((((((((((.#)))))))))))))....))).	1395	1416	1	-22.5	0	0.0078878	0.456	0	0	-16.4954	16	21	13	3UTR		0	0
hsa-miR-221-3p	XM_005264488	SFTPB	AGCTACATTGTCTGCTGGGTTTC#AAGCTCAGCTGGGGTTGTGCAAGCTA#(((((((.(.((.(((((((((.#))))))))).)).).)))...)))).	1900	1926	1	-19.2	1	0.0014786	0.544	0	0	-8.78285	19	26	9	3UTR		0	0
hsa-miR-221-3p	XM_005264850	LRRC3B	AGCTACATTGTCTGCTGGGTTTC#CCCAGCAGAATGAAGCTC#((((.(((..(((((((((....#)))))))))))).)))).	8082	8100	1	-22.7	0	0.000375285	0.574	0	0	-10.3555	16	18	12	3UTR		0	0
hsa-miR-221-3p	XM_005264867	METTL6	AGCTACATTGTCTGCTGGGTTTC#AGACACCAGCCTGGGCAACATAGCA#.((((..(((((((((((((((.#)))).)))))..))))))..)))).	1841	1866	1	-21.8	0	0.000700424	0.603	0	0	-7.23797	19	25	6	3UTR		0	0
hsa-miR-221-3p	XM_005266677	KDSR	AGCTACATTGTCTGCTGGGTTTC#GAACCCAGGAGGCAGAGGTTGCA#.((.((.((((((.((((((((.#)))))))).))))))..)).)).	4343	4366	1	-24.9	0	1.66672e-05	0.412	0	0	-9.22587	18	23	8	3UTR		1	0
hsa-miR-221-3p	XM_005268706	ANO6	AGCTACATTGTCTGCTGGGTTTC#TCTGCAGACAATGGTGGCTG#(((((((((((((((.(((....#))))))))))))).))))).	5419	5439	1	-22.8	1	6.53896e-05	0.471	0	0	-4.17062	18	20	13	3UTR		0	0
hsa-miR-221-3p	XM_005269005	DRAM1	AGCTACATTGTCTGCTGGGTTTC#GAAATCTGGCAATAAAAGGCAAATGTAAGCA#.((((((((((((((((((((((#)))))))))))......))))).)))).)).	2374	2405	1	-20.6	1	0.00517869	0.647	0	0	-3.79332	22	31	11	3UTR		0	0
hsa-miR-221-3p	XM_005269374	RUBCN	AGCTACATTGTCTGCTGGGTTTC#GAGACCAGCCTGGCCAATGTGGTG#.(((((((((((.(((.((((((#)))))))))..))).)))))))).	5271	5295	1	-22.2	1	0.00011567	0.544	0	0	-5.08246	20	24	9	3UTR		0	0
hsa-miR-221-3p	XM_005271505	ACAD8	AGCTACATTGTCTGCTGGGTTTC#GAAGCCCATGCTAACTCCTGGGCA#.(((.....((..((((((((((#)))))))).))..)).....))).	1302	1326	1	-19.4	0	0.000897763	0.529	0	0	-19.363	15	24	8	3UTR		0	0
hsa-miR-221-3p	XM_005277644	NPY4R2	AGCTACATTGTCTGCTGGGTTTC#GCTCCAGCAAGACAGTGAAAGGTA#.(((.(((((((((((((((...#)).)))))).)))))))...))).	3607	3631	1	-21.7	0	0.0105664	0.515	0	0	-7.91236	18	24	7	3UTR		0	0
hsa-miR-221-3p	XM_006710406	MEGF6	AGCTACATTGTCTGCTGGGTTTC#GAGGCCCCAGGGCAGACAATTTCACCAGCA#.(((..(((((((((((((((((#)))))))...))))))))))......))).	5718	5748	1	-24.1	0	0.0176743	0.426	0	0	-9.81332	20	30	10	3UTR		0	0
hsa-miR-221-3p	XM_006711224	ATF6	AGCTACATTGTCTGCTGGGTTTC#GAACCCGGGAGGCGGAGCTT#((((...((((((.((((((((.#)))))))).)))))))))).	2985	3005	1	-22.4	0	3.11192e-05	0.353	0	0	-12.3581	18	20	10	3UTR		0	0
hsa-miR-221-3p	XM_006712041	THNSL2	AGCTACATTGTCTGCTGGGTTTC#GGCCCGTGCAGCAGTGTCTGAGCTG#((((((((((.((((((((((..#)))))).))))))))))...)))).	3562	3587	1	-24	1	2.83502e-06	0.397	0	0	-6.76235	20	25	10	3UTR		0	0
hsa-miR-221-3p	XM_006712439	CCDC150	AGCTACATTGTCTGCTGGGTTTC#GAGCCCAGCAGCCGGGGCTGGCC#.(((((.(((.(((((((((((.#))))))))))).))).).)))).	2076	2099	1	-24.4	0	1.11732e-06	0.471	0	0	-8.16179	19	23	11	3UTR		0	0
hsa-miR-221-3p	XM_006712872	GCC2	AGCTACATTGTCTGCTGGGTTTC#AGACCCAGCAGCCAAGAGGAGGAGTGCACTTATGGAGCA#.(((.(((((.(((((((((((.#))))))))))).)).................))).))).	3911	3950	1	-22.1	0	0.000478624	0.529	0	0	-10.7371	19	39	11	3UTR		0	0
hsa-miR-221-3p	XM_006712875	TTLL4	AGCTACATTGTCTGCTGGGTTTC#GCCTGGCAGTTTTGTTGTGGCTG#(((((((....(((((((((...#)))))))))......))))))).	5638	5661	1	-22.7	1	1.14113e-07	0.426	0	0	-11.3749	16	23	9	3UTR		0	0
hsa-miR-221-3p	XM_006715043	DAAM2	AGCTACATTGTCTGCTGGGTTTC#GAGCCCAGCATGTGCGTTGGTTTGAGGGGGCGGGCGGTGTGTGTG#.(((((((((((((((((((((.#))))))))))......................))))))))).)).	5126	5171	1	-23.3	1	0.000156134	0.397	0	0	-3.79332	21	45	10	3UTR		0	0
hsa-miR-221-3p	XM_006715470	IFNGR1	AGCTACATTGTCTGCTGGGTTTC#CCCAGGGACCTTTGTAGCC#.((((((..((((.(((((....#)))))))))...)))))).	2283	2302	1	-20.8	1	0.0038672	0.5	0	0	-8.02019	15	19	9	3UTR		0	0
hsa-miR-221-3p	XM_006719078	LRP6	AGCTACATTGTCTGCTGGGTTTC#CCCAGTAGGCTTAGCTC#(((((....((((((((((....#)))))))))).))))).	5153	5170	1	-20.9	0	0.00229299	0.618	0	0	-10.7522	15	17	10	3UTR	MIRT046906	0	0
hsa-miR-221-3p	XM_006719294	MLXIP	AGCTACATTGTCTGCTGGGTTTC#GAGGCTCAGCAGCATGTTTGTGGCA#.((((((.(((((((((((((((#)))))))))))).)))..)))))).	6518	6543	1	-26.3	1	0.00157957	0.426	0	0	-6.10696	21	25	12	3UTR		0	0
hsa-miR-221-3p	XM_006720191	GPATCH2L	AGCTACATTGTCTGCTGGGTTTC#GAAACCAGCCCAGCAGACCTGTGAGTC#.(((.(((.((((((((((((..#.))))))))))))..)))))).	3055	3082	1	-26.8	0	0.000903861	0.412	0	0	-8.96875	18	22	12	3UTR		0	0
hsa-miR-221-3p	XM_006720953	ATF7IP2	AGCTACATTGTCTGCTGGGTTTC#GGGGCCCAATGGAGGCAAACTTGAGCA#.(((.((((((((.(((((((((#))))))))..).))))))...))))).	3288	3315	1	-20.3	0	0.0115386	0.603	0	0	-8.7692	20	27	8	3UTR		0	0
hsa-miR-221-3p	XM_006721051	GPRC5B	AGCTACATTGTCTGCTGGGTTTC#AGGCTCACTGGAAAATGTGGCTG#(((((((((.((((.(((((((.#))))))).)))).))))))))).	1583	1606	1	-20.3	1	0.0026765	0.559	0	0	-5.91553	20	23	9	3UTR		0	0
hsa-miR-221-3p	XM_006721656	CD300A	AGCTACATTGTCTGCTGGGTTTC#GGCTCCAGGAAAAGATGTGGCTC#(((((((((...(.(((((((..#))).)))).)...))))))))).	1564	1587	1	-19.4	1	8.55197e-05	0.471	0	0	-12.2085	17	23	9	3UTR		0	0
hsa-miR-221-3p	XM_006723213	ZNF793	AGCTACATTGTCTGCTGGGTTTC#AAACCCAATAGCAAAATGTGGCA#.((((((((..(((.(((((((.#))))))).)))...)))))))).	5658	5681	1	-21.5	1	0.0440232	0.632	0	0	-8.59606	18	23	8	3UTR		0	0
hsa-miR-221-3p	XM_006723784	KCNB1	AGCTACATTGTCTGCTGGGTTTC#GCCATGGTGGACAGTGAGCTC#((((.(((((((((((.(((...#)))..))))))))))))))).	9419	9440	1	-22.4	0	0.000139766	0.5	0	0	-8.05661	18	21	15	3UTR		0	0
hsa-miR-221-3p	XM_011510492	UBE2E3	AGCTACATTGTCTGCTGGGTTTC#AAACCTAGAAGGCTCAGTGGCTC#((((((...((((.((((((((.#)))))))).))))...)))))).	3260	3283	1	-21.9	0	0.00494197	0.647	0	0	-9.70813	18	23	8	3UTR		0	0
hsa-miR-221-3p	XM_011510549	AGAP1	AGCTACATTGTCTGCTGGGTTTC#GAAGCCTGGCAACGATGTAGCTT#(((((((((((.(((((((((((#)))))))))))))))))))))).	7915	7938	1	-30.9	1	0.00703677	0.397	0	0	-7.28438	22	23	22	3UTR	MIRT024193	0	0
hsa-miR-221-3p	XM_011511157	KIF5C	AGCTACATTGTCTGCTGGGTTTC#AATCTGACAGTAGCAGTGTAGA#..((((((((.((((((......#.)))))))))))))).	2971	2993	1	-20	1	0.00298932	0.647	0	0	-7.78178	14	16	14	3UTR		0	0
hsa-miR-221-3p	XM_011511872	TTC21B	AGCTACATTGTCTGCTGGGTTTC#TCCAGCAGAGGTTGCTGCTG#(((..((.(.(((((((((....#))))))))).).))..))).	4177	4197	1	-22	0	4.9743e-06	0.603	0	0	-14.6448	15	20	9	3UTR		0	0
hsa-miR-221-3p	XM_011512207	CHST10	AGCTACATTGTCTGCTGGGTTTC#AAACCCAGCGCCCAGGTAGCC#.(((((.(((..((((((((((.#))))))))))..)))))))).	2394	2415	1	-23.9	0	0.000927485	0.412	0	0	-11.5086	18	21	10	3UTR		0	0
hsa-miR-221-3p	XM_011512597	ATP11B	AGCTACATTGTCTGCTGGGTTTC#CCCAGTACAAGGCATATTTCAGGTGTGGCTG#(((((((((((((((((((....#))))))...)))))........)))))))).	4529	4560	1	-22.6	1	0.000209522	0.559	0	0	-3.93757	19	31	8	3UTR		1	0
hsa-miR-221-3p	XM_011514156	SEMA5A	AGCTACATTGTCTGCTGGGTTTC#AGCTCCAGGGACATGTAGCTT#(((((((.(((((.(((((((..#))).)))))))))))))))).	7225	7246	1	-22.2	1	0.000205491	0.515	0	0	-7.10805	19	21	16	3UTR		0	0
hsa-miR-221-3p	XM_011514455	GABBR1	AGCTACATTGTCTGCTGGGTTTC#GAGCCTAGCTGGACAGGTGGA#..((((.(((((((((((((((.#))))))))).)))))))))).	3009	3030	1	-23.7	0	8.92625e-05	0.412	0	0	-6.50069	19	21	10	3UTR		0	0
hsa-miR-221-3p	XM_011515456	C1GALT1	AGCTACATTGTCTGCTGGGTTTC#GAGGCTCAGAGACAAAGTAACTT#((.(((.((((((.(((((((((#))))))))))))))).))).)).	3732	3755	1	-20.8	0	0.00182325	0.632	0	0	-7.89564	20	23	15	3UTR		0	0
hsa-miR-221-3p	XM_011515528	SUGCT	AGCTACATTGTCTGCTGGGTTTC#CCTAGCAGGCAAGGAGA#..((...((((((((((((....#))))))))))))..)).	3342	3359	1	-20.6	0	0.000847936	0.662	0	0	-12.5207	14	17	12	3UTR		0	0
hsa-miR-221-3p	XM_011515572	STARD3NL	AGCTACATTGTCTGCTGGGTTTC#AAAAGAGGCAGGCAGTGGAGTC#.(((.(((((((((((.......#.))))))))))).))).	963	985	1	-19.4	0	0.000418473	0.515	0	0	-7.91236	14	17	11	3UTR		0	0
hsa-miR-221-3p	XM_011516020	OR2F1	AGCTACATTGTCTGCTGGGTTTC#CCAGCGGTCGTGTGGTC#.((((((.((.(((((((.....#))))))).)))))))).	3657	3674	1	-21.3	1	0.00013095	0.515	0	0	-8.93173	15	17	8	3UTR		0	0
hsa-miR-221-3p	XM_011517512	NKAIN3	AGCTACATTGTCTGCTGGGTTTC#GAAGGTGGACCTCAAACCCTGGCAGACAATTCCTGGTC#.((((.((((((((((((((((.#.)))))).))))))))))...)))).	5470	5508	1	-24.7	0	0.000506994	0.515	0	0	-5.69428	20	26	10	3UTR		0	0
hsa-miR-221-3p	XM_011518839	NIPSNAP3B	AGCTACATTGTCTGCTGGGTTTC#GGCAGGCAGTGGCAGCTT#((((.(((((((((((.......#)))))))))))..)))).	2359	2377	1	-21.3	0	0.000907672	0.588	0	0	-8.05661	15	18	11	3UTR		0	0
hsa-miR-221-3p	XM_011520769	ARNTL2	AGCTACATTGTCTGCTGGGTTTC#GGAACCTAGAACTGTGCTGTCCAGTGCAGTAGCCACTAGCCACATGTGGCTACTGAGCACTTGCAATGTGGCTA#(((((((((((.((((.(((...#.))).))))...))))))))))).	5356	5430	1	-24.5	1	6.80947e-05	0.559	0	0	-7.28438	18	24	11	3UTR		0	0
hsa-miR-221-3p	XM_011521378	CEP152	AGCTACATTGTCTGCTGGGTTTC#GGGGCTATTCTAAAGCTAGTCACTGAGCCAGCAGGCAGCTTGGCC#.((((..(((((((((((.((..#.)).)))))))))))..)))).	5983	6028	1	-25	0	3.8845e-07	0.471	0	0	-7.23797	17	22	11	3UTR		0	0
hsa-miR-221-3p	XM_011521985	TP53BP1	AGCTACATTGTCTGCTGGGTTTC#AAGCCGCAGATATTTATTTGTGTGTGGCTA#(((((((((((((((..(((((.#)))))))))))).........)))))))).	7961	7991	1	-21.1	1	0.000120898	0.618	0	0	-4.17062	20	30	12	3UTR		0	0
hsa-miR-221-3p	XM_011522424	ERCC4	AGCTACATTGTCTGCTGGGTTTC#GAACTCTGTAAGATGATGTGGA#..(((((((((((((.((((((.#)))))).))).)))))))))).	4985	5007	1	-19.5	1	0.0193894	0.647	0	0	-5.19005	19	22	10	3UTR		0	1
hsa-miR-221-3p	XM_011522547	RBFOX1	AGCTACATTGTCTGCTGGGTTTC#GGAGCCATGCTGATGATGTGGG#..((((((((((.((..((((((#))))))..)).)))))))))).	1375	1397	1	-23.3	1	7.43208e-05	0.515	0	0	-6.47918	18	22	10	3UTR		0	0
hsa-miR-221-3p	XM_011524490	SAMD14	AGCTACATTGTCTGCTGGGTTTC#GAGGCCAGTGGGCGCTGCAGCA#.(((.((.((((((((((.(((.#))).)))))))))).)).))).	1339	1361	1	-22	0	3.0245e-05	0.353	0	0	-10.226	18	22	10	3UTR		0	0
hsa-miR-221-3p	XM_011525213	CARD14	AGCTACATTGTCTGCTGGGTTTC#AGGCCCAGCGGACTCTGCCTTCCCCTGACCTGGCTT#(((((((..(((((((((((((.#)))))))))))))..)).............))))).	4156	4192	1	-25	1	0.00385855	0.382	0	0	-7.3076	20	36	13	3UTR		0	0
hsa-miR-221-3p	XM_011525881	FECH	AGCTACATTGTCTGCTGGGTTTC#CCGGTGGACCCCGTGGCG#.(((((...(((((((((.....#)))))))))...))))).	1285	1303	1	-21	0	5.50317e-05	0.353	0	0	-8.70704	14	18	9	3UTR		0	0
hsa-miR-221-3p	XM_011526987	PSG8	AGCTACATTGTCTGCTGGGTTTC#CTCAGGGGGAAATGTGGCTC#(((((((((.(((.(((((....#))))).))).))))))))).	1576	1596	1	-21.9	1	7.11963e-05	0.544	0	0	-6.03692	17	20	9	3UTR		0	0
hsa-miR-221-3p	XM_011527787	NIBAN3	AGCTACATTGTCTGCTGGGTTTC#GAGGCCAGCTTGGGCAATGTGGTG#.(((((((((((((((((.(((.#))).)))))..)))))))))))).	2713	2737	1	-26.5	1	0.00025021	0.588	0	0	-3.79332	20	24	12	3UTR		0	0
hsa-miR-221-3p	XM_011528853	OSER1	AGCTACATTGTCTGCTGGGTTTC#GGCAGACCTTGTGGCC#.((((((..(((((((.......#)))))))..)))))).	1238	1254	1	-21.2	1	0.000213247	0.574	0	0	-7.16335	13	16	7	3UTR		0	0
hsa-miR-221-3p	XM_011529286	SIRPG	AGCTACATTGTCTGCTGGGTTTC#GAGGCTCAGCTTGAGAGAATGAGCC#.(((.((((.(((((((((((((#))))))))))...))).))))))).	1339	1364	1	-23.8	0	0.000361222	0.485	0	0	-9.15487	20	25	10	3UTR		0	0
hsa-miR-221-3p	XM_011529447	HSF2BP	AGCTACATTGTCTGCTGGGTTTC#GCTCAGCAGACCATGA#.....(((.(((((((((((...#))))))))))).))).	1545	1561	1	-21.1	0	0.00371017	0.515	0	0	-14.722	14	16	11	3UTR		0	0
hsa-miR-221-3p	XM_011530017	KIAA0930	AGCTACATTGTCTGCTGGGTTTC#GAACCTAGTAGGCAGAGGTTGCA#.((.((.(((((((((((((((.#)))))))))))))))..)).)).	4318	4341	1	-24.7	0	9.54747e-05	0.5	0	0	-8.36903	19	23	15	3UTR		0	0
hsa-miR-221-3p	XM_011530867	UPRT	AGCTACATTGTCTGCTGGGTTTC#GAGGTTGGATACCTAGCAGCAAGTAGTA#.(((((.(((.(((((((((.((#.)).))))))))))))))))).	1776	1804	1	-24.6	0	0.00320058	0.559	0	0	-8.16179	19	22	17	3UTR		0	0
hsa-miR-221-3p	XM_011531353	WDR44	AGCTACATTGTCTGCTGGGTTTC#GAAACCCTGGGCTGATAGAGTAGA#..((((.(((((.((((((((((#)))))))..))).))))).)))).	3212	3236	1	-22.4	0	0.00150042	0.603	0	0	-7.78982	19	24	7	3UTR		0	0
hsa-miR-221-3p	XM_011531716	TMEM154	AGCTACATTGTCTGCTGGGTTTC#GGAAGCCAGAGGCTCCTGTAGCTC#(((((((..((((.((((.((((#)))).))))))))...))))))).	640	664	1	-23	1	8.19253e-07	0.426	0	0	-8.16444	19	24	8	3UTR		0	0
hsa-miR-221-3p	XM_011532483	STAMBP	AGCTACATTGTCTGCTGGGTTTC#CAGACAGTGTGGTTG#((((((((((((((.........#)))))))))))))).	1644	1659	1	-19.9	1	0.000557757	0.632	0	0	-4.90607	14	15	14	3UTR	MIRT024178	0	0
hsa-miR-221-3p	XM_011532871	MTIF2	AGCTACATTGTCTGCTGGGTTTC#CCCAGTAGGCAGGACCATAGG#..(((..((((((((((((....#)))))))))))).....))).	2904	2925	1	-20.1	0	0.00346786	0.618	0	0	-8.40165	15	21	12	3UTR		0	0
hsa-miR-221-3p	XM_011533041	PAPOLG	AGCTACATTGTCTGCTGGGTTTC#GAACTGTCAAACTTTGACCTGTAGATGCTGTAGCA#.((((((.(((((((.(((((..#.)))))))))))).)))))).	2309	2344	1	-22.2	1	0.00145828	0.618	0	0	-6.34001	18	21	12	3UTR		1	0
hsa-miR-221-3p	XM_011533705	MAP4	AGCTACATTGTCTGCTGGGTTTC#GGGCCCTGGAGGCGGTGCGGCA#.(((.((((((((.(.((((((.#)))))).).)))))))).))).	7866	7888	1	-23.9	0	0.000148949	0.309	0	0	-9.00225	18	22	8	3UTR		0	0
hsa-miR-221-3p	XM_011534593	RNF130	AGCTACATTGTCTGCTGGGTTTC#AACCACTGGCAAGTGACAGTGTGGCTC#(((((((((((((((((((((..#)))).).))))...)))))))))))).	5486	5513	1	-24.1	1	0.00468299	0.529	0	0	-3.93757	21	27	12	3UTR		0	0
hsa-miR-221-3p	XM_011536116	EPM2A	AGCTACATTGTCTGCTGGGTTTC#CCCAGCATCATGTAGTG#.((((((.((..(((((((....#))))))).)))))))).	1552	1569	1	-20.2	1	0.00338777	0.632	0	0	-12.2785	15	17	8	3UTR		0	0
hsa-miR-221-3p	XM_011536563	ATG14	AGCTACATTGTCTGCTGGGTTTC#GAGAACCAGCAGGCAATT#......((((((((((((.((((#)))).)))))))))))).	1708	1726	1	-22.3	0	0.0248603	0.691	0	0	-15.5666	16	18	12	3UTR		0	0
hsa-miR-221-3p	XM_011536677	POMT2	AGCTACATTGTCTGCTGGGTTTC#CCCAGTGGCTGCAGGTAGCTG#((((((.((((((((((((....#))))))))..)))))))))).	2821	2842	1	-23.1	0	2.31234e-05	0.353	0	0	-5.48126	18	21	10	3UTR		0	0
hsa-miR-221-3p	XM_011539977	TM9SF3	AGCTACATTGTCTGCTGGGTTTC#AGCCTTGGGGATAATGTGTGGAGCG#.((((((((((((.(.(((((..#))))).).)))))))))....))).	2028	2053	1	-19.8	1	0.00448245	0.515	0	0	-4.88321	18	25	9	3UTR		0	0
hsa-miR-221-3p	XM_011541489	ANKRD65	AGCTACATTGTCTGCTGGGTTTC#GGGAGAAAGTAGGGGATGTGGCTT#(((((((((.((((((...((((#))))...)))))).))))))))).	2610	2634	1	-22.6	1	0.00818011	0.382	0	0	-5.18008	19	24	9	3UTR		0	0
hsa-miR-221-3p	XM_011541812	AMIGO1	AGCTACATTGTCTGCTGGGTTTC#GGACCTAGCTGATTCTCAATGTATGCC#.(((((((((((.(((((((((.#))))))))).))....))))))).)).	2851	2878	1	-21.7	1	0.208906	0.544	0	0	-5.08246	20	27	9	3UTR		1	0
hsa-miR-221-3p	XM_011542232	ESPN	AGCTACATTGTCTGCTGGGTTTC#GGGGCTGCGGCTCCTCCTTGCGGCAGTGTGGCC#.(((((((((.((((.(((....#.))).))))))))))))).	4475	4508	1	-23.3	1	6.0719e-05	0.397	0	0	-6.85115	16	19	13	3UTR		0	0
hsa-miR-221-3p	XM_011542437	ZFYVE9	AGCTACATTGTCTGCTGGGTTTC#GCCCAGTGATGTTCTTTGTAGCA#.((((((..(((.(((((((...#))))))))))......)))))).	5656	5679	1	-19.8	1	0.0124724	0.574	0	0	-8.45248	16	23	10	3UTR		0	0
hsa-miR-221-3p	XM_011543002	PDZD3	AGCTACATTGTCTGCTGGGTTTC#GCTCCCTCCCTTCCTGCAGGCCCACCTGCCAGCAGAGGGTGTGGTTG#(((((((((.((((((((.....#.)))))))).))))))))).	2173	2220	1	-28.1	1	0.000397032	0.353	0	0	-5.18008	17	20	9	3UTR		0	0
hsa-miR-221-3p	XM_011543830	MTMR9	AGCTACATTGTCTGCTGGGTTTC#GAACCCGGGAGGCAGAGCTT#((((...((((((.((((((((.#)))))))).)))))))))).	6275	6295	1	-23.2	0	0.000542221	0.397	0	0	-12.3581	18	20	10	3UTR		0	0
hsa-miR-221-3p	XM_011544167	GNG4	AGCTACATTGTCTGCTGGGTTTC#GAGATCCACAGACATGTCACTGAGCTC#(((((((.((((((.((((((((#))))))))))))))))).....)))).	3497	3524	1	-21.6	1	0.00231344	0.485	0	0	-6.98666	21	27	17	3UTR		0	0
hsa-miR-221-3p	XM_011544385	LZTS1	AGCTACATTGTCTGCTGGGTTTC#AGACCTAGCAGGCTGTTCCATGTTCTATTTTTGACTGTAGCC#.((((((..(((((((((((((.#)))))))))))))......................)))))).	3777	3819	1	-25.2	1	0.00569815	0.5	0	0	-7.16335	19	42	13	3UTR		0	0
hsa-miR-221-3p	XM_011544512	NRG1	AGCTACATTGTCTGCTGGGTTTC#GCTCAGCAGACTACAGCTT#((((.....(((((((((((...#)))))))))))...)))).	5807	5826	1	-21.6	0	0.00039299	0.485	0	0	-14.8713	15	19	11	3UTR		1	1
hsa-miR-221-3p	XM_011544554	SLC25A37	AGCTACATTGTCTGCTGGGTTTC#CCCTGGGCAGAATGTAGCTT#((((((((..(((((((((....#)))..)))))))))))))).	3230	3250	1	-22	1	0.00163649	0.5	0	0	-6.23647	17	20	14	3UTR		1	0
hsa-miR-221-3p	XM_011544586	BIN3	AGCTACATTGTCTGCTGGGTTTC#CCCAGCAGGTAAGCAGTGTAGA#..(((((((((((((((((....#))))))))....))))))))).	1139	1161	1	-26.4	1	0.00374281	0.485	0	0	-4.957	17	22	9	3UTR		0	0
hsa-miR-221-3p	XM_011546079	LOC102723996	AGCTACATTGTCTGCTGGGTTTC#GCCCAGGAGAAGGGGTTCCCCGGGGACAGTGGGCTC#((((.((((((((.(((((....#.))))))))))))))))).	1699	1735	1	-22.5	0	0.000675246	0.279	0	0	-8.91345	17	19	17	3UTR		0	0
hsa-miR-221-3p	XM_016999990	TTC34	AGCTACATTGTCTGCTGGGTTTC#TCCAGCAGCTAATGTGAGCTA#((((((((((.((((((((....#)))))))).)))))).)))).	4241	4262	1	-24	1	0.000286473	0.618	0	0	-6.76235	18	21	8	3UTR		0	0
hsa-miR-221-3p	XM_017000617	EPS15	AGCTACATTGTCTGCTGGGTTTC#GACCTAGTGGACAAGCTG#((((....(((((((((((((..#))))))))))))))))).	3758	3776	1	-21.7	0	0.00675628	0.603	0	0	-13.8149	17	18	17	3UTR		0	0
hsa-miR-221-3p	XM_017000683	NTNG1	AGCTACATTGTCTGCTGGGTTTC#GACACCCCCACTCAGACAGTGTAC#...(((((((((((.((((....#.))))..))))))))))).	2157	2181	1	-21.3	0	0.0157392	0.544	0	0	-7.24999	15	19	11	3UTR		0	0
hsa-miR-221-3p	XM_017001002	NPHP4	AGCTACATTGTCTGCTGGGTTTC#GAGACTCAGCAGGCCGGGGGCA#.(((.....((((((((((((((#))))))))))))))....))).	3829	3851	1	-25.9	0	1.51338e-06	0.309	0	0	-14.727	17	22	14	3UTR		0	0
hsa-miR-221-3p	XM_017001275	LGALS8	AGCTACATTGTCTGCTGGGTTTC#GAGCCAGGGACAGTGCTGCTG#(((..((((((((.((((.((..#)).))))))))))))..))).	1197	1218	1	-21.7	0	0.000164034	0.397	0	0	-11.9455	17	21	12	3UTR		0	0
hsa-miR-221-3p	XM_017002215	TNFRSF1B	AGCTACATTGTCTGCTGGGTTTC#GATGCCCAGAGGGCCCAGGCAGGCCACCATATTCAGTGCTGTGGCC#.((((((..(((((((((((((.#.)))))))).)))))...............)))))).	2385	2431	1	-23.2	1	0.000138379	0.456	0	0	-7.16335	19	37	8	3UTR		0	0
hsa-miR-221-3p	XM_017002373	KIAA0319L	AGCTACATTGTCTGCTGGGTTTC#CAGCAGGAATGTAGCC#.((((((((.(((((((......#))))))))))))))).	5277	5293	1	-22.1	1	0.00157077	0.529	0	0	-5.03583	15	16	15	3UTR		0	0
hsa-miR-221-3p	XM_017003106	CEBPZOS	AGCTACATTGTCTGCTGGGTTTC#ACCATGAAAAGGTCTTTCAAAAATATTCCTATCAGCCAGGCATGGTGGCTC#((((((..((((((((((.....#.))))).)))))..)))))).	981	1032	1	-22	0	4.13216e-06	0.529	0	0	-7.7949	16	21	6	3UTR		0	0
hsa-miR-221-3p	XM_017003387	MTERF4	AGCTACATTGTCTGCTGGGTTTC#GAAACCTGGCTGGCTGTGAGTC#.(((.(((.(((.((((((((((#)))))))))).))).)))))).	4187	4209	1	-22.3	0	1.78174e-06	0.485	0	0	-10.2579	19	22	10	3UTR		0	0
hsa-miR-221-3p	XM_017005102	ING5	AGCTACATTGTCTGCTGGGTTTC#GACCCATCAGCACAGTGGGTA#.(((.(((((((((.((((((..#)))))).))).))))))))).	1277	1298	1	-20.5	0	3.76076e-05	0.368	0	0	-8.64781	18	21	9	3UTR		0	0
hsa-miR-221-3p	XM_017005753	C3orf22	AGCTACATTGTCTGCTGGGTTTC#TCCAGCAGGTTACAGTGTTGCA#.((.(((((((((((((((....#))))))))...))))))).)).	999	1021	1	-23.2	0	0.0161892	0.471	0	0	-6.82535	17	22	8	3UTR		0	0
hsa-miR-221-3p	XM_017006158	ERC2	AGCTACATTGTCTGCTGGGTTTC#GAAACTACCAGTGGGCATGTATTAGCC#.((((((.(((((((((((((((#)))))..)))))))))))))...))).	6215	6242	1	-21.3	1	0.000100152	0.544	0	0	-6.10696	21	27	13	3UTR		0	0
hsa-miR-221-3p	XM_017007486	OXNAD1	AGCTACATTGTCTGCTGGGTTTC#GGAGCCGAGCAGGTCAGGCAGGCCCTGCCGAGAATGTGGCC#.((((((((.((.((.((((((.#.)))))).)).)).)))))))).	1507	1548	1	-25.6	1	7.73916e-06	0.397	0	0	-6.55801	18	23	8	3UTR		0	0
hsa-miR-221-3p	XM_017008383	DDX60	AGCTACATTGTCTGCTGGGTTTC#GCCTACCGTCACCTATGACATTAGGGACAATGTGGTTT#(((((((((((((.(((((((..#.))).))))))))))))))))).	3956	3994	1	-19.9	1	0.00914616	0.632	0	0	-4.79441	20	23	17	3UTR		0	0
hsa-miR-221-3p	XM_017008527	REST	AGCTACATTGTCTGCTGGGTTTC#GACCTCAGCAGATGAAGTGA#...(((.((((((((((((((..#)))).)))))))))).))).	6696	6716	1	-20.9	0	0.0101759	0.618	0	0	-8.05823	17	20	10	3UTR		0	0
hsa-miR-221-3p	XM_017008655	CEP44	AGCTACATTGTCTGCTGGGTTTC#TCCGGCGTAACACTTTTTAAGACCAGTGTAACAGAAAGAGAATGTAGCC#.((((((((.(((.((((((((.#.))))).......)))..))).)))))))).	2372	2421	1	-20.5	1	0.0408392	0.618	0	0	-5.89267	19	31	8	3UTR		0	0
hsa-miR-221-3p	XM_017009746	RANBP17	AGCTACATTGTCTGCTGGGTTTC#AAACACAGGGGACAGTGTAT#...((((((((((.(((.((((.#)))).))).)))))))))).	2445	2465	1	-21.3	0	0.00444122	0.544	0	0	-7.37138	17	20	10	3UTR		0	0
hsa-miR-221-3p	XM_017010620	SIRT5	AGCTACATTGTCTGCTGGGTTTC#TGCAGTAATCAAGACAGTGTGGCA#.((((((((((((((((.(....#).)))).....)))))))))))).	2529	2553	1	-22.2	1	0.00137563	0.632	0	0	-3.79332	17	24	12	3UTR		0	0
hsa-miR-221-3p	XM_017010714	MOXD1	AGCTACATTGTCTGCTGGGTTTC#AGGCTGAGGAGAAAAAATGTAGCTG#(((((((((.(((.((.(((((.#))))).)).)))...))))))))).	2574	2599	1	-21.6	1	0.00336782	0.559	0	0	-6.03692	19	25	9	3UTR		0	0
hsa-miR-221-3p	XM_017011273	DEK	AGCTACATTGTCTGCTGGGTTTC#AGACCTGAACTCAGATTATGATGTGGCC#.((((((((((...((((((((.#.))))))))...)))))))))).	1477	1505	1	-21.5	1	0.000902184	0.529	0	0	-9.2861	18	23	10	3UTR		0	0
hsa-miR-221-3p	XM_017011306	OGFRL1	AGCTACATTGTCTGCTGGGTTTC#ACCCAGCAGATTGTGTT#....((((.(((((((((((...#))))))))))).)))).	6662	6679	1	-23.7	0	0.000265644	0.574	0	0	-10.603	15	17	11	3UTR		0	0
hsa-miR-221-3p	XM_017011367	TTBK1	AGCTACATTGTCTGCTGGGTTTC#GAGACCCAGCTTAGAAGCAGTGGCAGCTA#((((.((((((((((((((((((#))))))))))..))..))))))..)))).	3446	3475	1	-26.7	0	0.00126296	0.485	0	0	-8.05661	22	29	10	3UTR		0	0
hsa-miR-221-3p	XM_017011528	ZSCAN12	AGCTACATTGTCTGCTGGGTTTC#AACAAGTTGATAATGTAGCC#.(((((((((((.(((..(((..#))).))).))))))))))).	4270	4290	1	-19.1	1	0.00314016	0.603	0	0	-5.08246	17	20	11	3UTR		0	0
hsa-miR-221-3p	XM_017012433	PRKAR1B	AGCTACATTGTCTGCTGGGTTTC#GGGACTCCAGCAGGCC#.........((((((((((((((#))))).))))))))).	1504	1520	1	-20.8	0	2.36681e-06	0.412	0	0	-20.4803	14	16	9	3UTR		0	0
hsa-miR-221-3p	XM_017012594	CYREN	AGCTACATTGTCTGCTGGGTTTC#GAAGCCCAGGACCAGGCATGTGGA#..(((((.(((((((((((((((#)))))))))...))))))))))).	6406	6430	1	-26.2	0	0.000143596	0.5	0	0	-7.27064	20	24	11	3UTR		0	1
hsa-miR-221-3p	XM_017013350	TRIQK	AGCTACATTGTCTGCTGGGTTTC#ACCTAGCAATGCAGTATAGTA#.((((.(((((.((((((((...#))))))))..))))).)))).	590	611	1	-19.1	0	0.00111356	0.662	0	0	-9.04109	17	21	8	3UTR		0	0
hsa-miR-221-3p	XM_017013400	KCNQ3	AGCTACATTGTCTGCTGGGTTTC#AAACCATAGGCAGGCAGTCTAGCTT#(((((.((((((((((.(((((.#)))))...)))))))))).))))).	14875	14900	1	-24.2	0	9.16604e-05	0.544	0	0	-5.83853	20	25	10	3UTR		1	1
hsa-miR-221-3p	XM_017013603	NTAQ1	AGCTACATTGTCTGCTGGGTTTC#GAAGCCTGCAGGCTGTGGTTT#(((((((..((((((.(((((((#)))))))))))))))))))).	1796	1817	1	-23.7	1	0.000914638	0.515	0	0	-7.54065	20	21	20	3UTR		0	0
hsa-miR-221-3p	XM_017016189	IDE	AGCTACATTGTCTGCTGGGTTTC#GGGGCTCCATTTCTACTGTCAGATCAATGTGGTG#.((((((((((((((((((((((#))))).)))........).)))).))))))))).	4546	4580	1	-19.2	1	0.00107504	0.559	0	0	-3.79332	22	34	9	3UTR		0	0
hsa-miR-221-3p	XM_017017599	CRACR2B	AGCTACATTGTCTGCTGGGTTTC#GAGGCCAGGCGGGCGGGCAGCA#.(((.(.(((((((((.((((((#)))))).)))))))))).))).	1485	1507	1	-23	0	9.06759e-05	0.294	0	0	-9.45605	19	22	10	3UTR		0	0
hsa-miR-221-3p	XM_017017838	OVOL1	AGCTACATTGTCTGCTGGGTTTC#CCCAGTGGACATCAGAGTC#.(((....(((((((((((....#)))))))))))....))).	1182	1201	1	-20.8	0	0.000225078	0.397	0	0	-13.6706	14	19	11	3UTR		0	0
hsa-miR-221-3p	XM_017017873	CDON	AGCTACATTGTCTGCTGGGTTTC#GAACATACCTGACCCTGGGGGCGATGTGGA#..(((((((((((.(.(((((..#.))))).).))))))))))).	7694	7724	1	-25.6	1	0.000300044	0.353	0	0	-6.04689	17	21	11	3UTR		1	1
hsa-miR-221-3p	XM_017018188	STX3	AGCTACATTGTCTGCTGGGTTTC#GACTCAGCTAACAATCTAGCC#.((((.(((((..((((((((..#))))))))..))))).)))).	1014	1035	1	-21.7	0	0.00469101	0.456	0	0	-10.3302	17	21	8	3UTR		0	0
hsa-miR-221-3p	XM_017018221	TRPC6	AGCTACATTGTCTGCTGGGTTTC#GAAAATGGGTCCCAGCGGACAGGGGCTG#((((...((((((((((((.(((#.))).)))))))))))).)))).	3106	3134	1	-25.5	0	2.33603e-07	0.412	0	0	-11.5013	19	23	12	3UTR		0	0
hsa-miR-221-3p	XM_017018287	RIC3	AGCTACATTGTCTGCTGGGTTTC#GGACCTAGAGAGATTATGTGGTTT#((((((((.((((.((((((((.#))))))))..)))).)))))))).	6321	6345	1	-21.3	1	0.0126063	0.603	0	0	-5.8508	20	24	8	3UTR		0	0
hsa-miR-221-3p	XM_017020172	NAV3	AGCTACATTGTCTGCTGGGTTTC#AAACCTAAGACATGTGGCG#.((((((.(((((..(((((((.#)))))))))))))))))).	7213	7232	1	-20.4	1	0.000594826	0.588	0	0	-7.69925	18	19	18	3UTR		0	1
hsa-miR-221-3p	XM_017020424	LRRC63	AGCTACATTGTCTGCTGGGTTTC#AAAGCCAGCTTGCAGTGGGTTG#((((.((((((..(((((.(((.#))).)))))..)))))))))).	1978	2000	1	-20.2	0	0.000964863	0.588	0	0	-12.6925	18	22	10	3UTR		0	0
hsa-miR-221-3p	XM_017021421	EXD2	AGCTACATTGTCTGCTGGGTTTC#GAGGCGCAGTAAAATAGAGCCAGCAGCAAAGTAGA#..((((.(((.(((((((.(((.#.))).)))))))))).)))).	3655	3690	1	-22.6	0	0.00150755	0.515	0	0	-9.32546	17	21	10	3UTR		0	0
hsa-miR-221-3p	XM_017021677	TCL1A	AGCTACATTGTCTGCTGGGTTTC#GACCCAGTGTTGGGATATGTGCGCA#.((((((.(((((((((((((..#))))))))....))))))))).)).	665	690	1	-20.4	1	0.000183923	0.574	0	0	-6.10696	19	25	9	3UTR		0	0
hsa-miR-221-3p	XM_017022254	NTRK3	AGCTACATTGTCTGCTGGGTTTC#AAAAACAGCAGCAACAACAACAGTGTGGCTT#(((((((((((((((((..(((.#)))..))))))........))))))))))).	19117	19148	1	-23.1	1	0.000963162	0.662	0	0	-3.93757	20	31	11	3UTR		0	0
hsa-miR-221-3p	XM_017022419	DTWD1	AGCTACATTGTCTGCTGGGTTTC#ACAAAGCAGGCAATACTGAGCA#.(((..((((((((((..((...#))..))))))))))....))).	1695	1717	1	-18.7	0	0.00431626	0.662	0	0	-9.81332	15	22	10	3UTR		0	0
hsa-miR-221-3p	XM_017022581	SNX22	AGCTACATTGTCTGCTGGGTTTC#GAGGCCCAGTAGCTGGCAAAGTTTAGAAGCA#.(((((.((((((((((((((((#))))))))))))...)))).)).....))).	1675	1706	1	-23.1	0	0.00542907	0.471	0	0	-5.33701	21	31	12	3UTR		0	0
hsa-miR-221-3p	XM_017022734	ZNF592	AGCTACATTGTCTGCTGGGTTTC#GCCCAGCAGGATGTAGTG#.((((((((..(((((((((...#))))))))))))))))).	5414	5432	1	-25.7	1	0.000358099	0.368	0	0	-7.86061	17	18	17	3UTR		0	0
hsa-miR-221-3p	XM_017023242	ABCC1	AGCTACATTGTCTGCTGGGTTTC#CCTAGCAGAAAAATGTGTTA#(((.(((((.(((((((((....#)))))))))..)))))))).	5287	5307	1	-20.3	0	0.00306754	0.485	0	0	-8.2121	17	20	9	3UTR		0	0
hsa-miR-221-3p	XM_017023433	THUMPD1	AGCTACATTGTCTGCTGGGTTTC#GAGGCGGGAGGATGCTTGAACCCAGCAGTTTGAGGTTGCAGTGAGCTA#((((.(((((((((((((((((.#.))))))))))).........)))))))))).	1781	1829	1	-28.5	0	1.42878e-05	0.5	0	0	-8.05661	21	32	11	3UTR		0	0
hsa-miR-221-3p	XM_017024196	COX11	AGCTACATTGTCTGCTGGGTTTC#GAAGCCCAGGAAGAAGATGGCA#.((..((((.(((.(((((((((#)))))))))..))).)))))).	967	989	1	-20.4	0	0.0131783	0.559	0	0	-13.0437	18	22	9	3UTR		0	0
hsa-miR-221-3p	XM_017024578	SLFN14	AGCTACATTGTCTGCTGGGTTTC#GAGGCTTGAATCCAGGAGACATGTGGA#..(((((.(((((.((((((((.#.)))))))).)))))))))).	4530	4557	1	-24.7	0	0.000583795	0.588	0	0	-8.12748	18	21	10	3UTR		0	0
hsa-miR-221-3p	XM_017024817	VPS53	AGCTACATTGTCTGCTGGGTTTC#GAACCCAGGAGGCAGAGGCTG#((((...((((((.((((((((.#)))))))).)))))).)))).	6489	6510	1	-25	0	9.83547e-05	0.412	0	0	-12.3581	18	21	8	3UTR	MIRT046870	0	0
hsa-miR-221-3p	XM_017025749	SMAD2	AGCTACATTGTCTGCTGGGTTTC#GCCCGGCTGACAGTT#......((((((.(((((((...#))))))).)))))).	3977	3992	1	-19.9	0	0.000316117	0.5	0	0	-16.8557	13	15	7	3UTR		0	0
hsa-miR-221-3p	XM_017025780	MBP	AGCTACATTGTCTGCTGGGTTTC#AAGCCCAGCTATCAAACCACACCAGACATGTAT#...((((.((((((((((((((.#)))))))))..............))))))))).	2211	2244	1	-19.9	0	0.0252158	0.544	0	0	-8.82818	18	33	9	3UTR		0	0
hsa-miR-221-3p	XM_017026531	ZC3H4	AGCTACATTGTCTGCTGGGTTTC#ACTCAGGAGACAGTGAGAGTG#.(((.((((((((.((((((...#)))))).))))))))..))).	4270	4291	1	-22.5	0	0.0304171	0.5	0	0	-8.7692	17	21	8	3UTR		0	0
hsa-miR-221-3p	XM_017026688	ZNF875	AGCTACATTGTCTGCTGGGTTTC#GCCCAGGCAGATAGGGGTGGGTA#(.((((.(((((((((((((...#)))))).)))))))..)))).).	4541	4564	1	-23	0	0.000849348	0.456	0	0	-6.64494	18	23	7	3UTR		0	0
hsa-miR-221-3p	XM_017026761	ZNF233	AGCTACATTGTCTGCTGGGTTTC#GCCCGGCATACATGTAT#...((((.(((.((((((((...#)))))))).))))))).	841	858	1	-19.2	0	0.00150357	0.529	0	0	-12.175	15	17	8	3UTR		0	0
hsa-miR-221-3p	XM_017027156	ZSWIM4	AGCTACATTGTCTGCTGGGTTTC#GGAGCCCGGCTGGAGATGGGGGCA#.(((.((((.((.((((((((((#)))))))))).)).))))..))).	3202	3226	1	-24.1	0	0.000176998	0.368	0	0	-10.444	19	24	10	3UTR		1	0
hsa-miR-221-3p	XM_017027889	RIN2	AGCTACATTGTCTGCTGGGTTTC#GAAACCAAGTAATGTATAATGTGGCTT#((((((((((((((((.((((((#)))))).))))..).))))))))))).	4216	4243	1	-22.2	1	0.00201959	0.706	0	0	-3.93757	22	27	11	3UTR		0	0
hsa-miR-221-3p	XM_017028965	SYN3	AGCTACATTGTCTGCTGGGTTTC#AGACCAGGCAGGCAAAGGCC#.(((...(((((((((.(((((.#))))).))))))))).))).	2321	2341	1	-21.2	0	1.92624e-05	0.353	0	0	-11.357	17	20	9	3UTR		0	0
hsa-miR-221-3p	XM_017029791	ZFX	AGCTACATTGTCTGCTGGGTTTC#GGGACCCAGCAGTCTTTGTT#....(((..(.((((((((((((#)))))))))))).)..))).	6994	7014	1	-24.6	0	0.061397	0.544	0	0	-15.7414	16	20	12	3UTR		0	0
hsa-miR-221-3p	XM_017029837	APOO	AGCTACATTGTCTGCTGGGTTTC#GAATCCCTTCACCTAGAGATAATGTACAAGCC#.((((((((((((.((((((...#.)))))))))))))))...))).	880	912	1	-20.8	1	0.0794232	0.603	0	0	-4.65016	18	23	15	3UTR		0	0
hsa-miR-221-3p	XM_024446047	SMAD5	AGCTACATTGTCTGCTGGGTTTC#AAGCCACATCTAATGGCACAGATAGAGGATGTAGCTA#(((((((((.(((((((.(((..#.))).))).)))).))))))))).	5993	6030	1	-23.3	1	0.00507261	0.647	0	0	-5.18008	19	24	9	3UTR		0	0
hsa-miR-221-3p	XM_024446383	ANKS1A	AGCTACATTGTCTGCTGGGTTTC#GAGCCAGAGGCAGTGGGGGCTG#((((.((((((((.((((.((..#)).))))))))))))..)))).	4975	4997	1	-22.5	0	1.75661e-06	0.368	0	0	-8.91345	18	22	12	3UTR		0	0
hsa-miR-221-3p	XM_024447146	POTEA	AGCTACATTGTCTGCTGGGTTTC#GCCCAGCAGAGATCAGGTC#.(((....(.((((((((((...#)))))))))).)...))).	3499	3518	1	-20.8	0	0.00502054	0.529	0	0	-14.9131	14	19	10	3UTR		0	0
hsa-miR-221-3p	XM_024449346	IPO5	AGCTACATTGTCTGCTGGGTTTC#GAATTTCAGATGACAGTGTGGTC#.(((((((((((..(((((.(((#))).)))))..))))))))))).	5257	5280	1	-21.6	1	0.000232239	0.559	0	0	-5.9393	19	23	11	3UTR		0	1
hsa-miR-221-3p	XM_024449506	COCH	AGCTACATTGTCTGCTGGGTTTC#GAAACTCAGGAAAGAGGAGATAATGTGGA#..(((((((((((.(((((((((#))))))))).).......)))))))))).	1994	2023	1	-21.9	1	0.00703387	0.618	0	0	-5.81384	20	29	10	3UTR		0	0
hsa-miR-221-3p	XM_024450008	ISLR2	AGCTACATTGTCTGCTGGGTTTC#ACCCGCAGACGGTGGGCG#.(((.((((((((((.((((...#))))))))))))))))).	2645	2663	1	-25.1	0	7.63538e-07	0.405	0	0	-8.14541	17	18	17	3UTR		0	0
hsa-miR-221-3p	XM_024450656	ZNF652	AGCTACATTGTCTGCTGGGTTTC#GAACCCAGGAGGCGGAGCTT#((((...((((((.((((((((.#)))))))).)))))))))).	4900	4920	1	-23.1	0	0.00227665	0.471	0	0	-12.3581	18	20	10	3UTR	MIRT024148	1	1
hsa-miR-221-3p	XM_024450848	TNRC6C	AGCTACATTGTCTGCTGGGTTTC#GAATCCAGCAGGCCAATAGTGAAATGTGA#...(((((((((((((((((((.#))))))))))))).........)))))).	6921	6950	1	-22.2	0	0.00972439	0.603	0	0	-6.51454	19	29	13	3UTR		1	1
hsa-miR-221-3p	XM_024451337	RDH13	AGCTACATTGTCTGCTGGGTTTC#GAGCTGGGCAGACACACGGGCA#.(((....((((((((.(((((.#))))).))))))))....))).	1122	1144	1	-23.2	0	0.000294502	0.338	0	0	-13.6706	16	22	8	3UTR		0	0
hsa-miR-221-3p	XM_024451402	ZNF780B	AGCTACATTGTCTGCTGGGTTTC#GGAACTTAGTAAACCTACAGAAGTGTAGCC#.((((((((.((((.(((((((.#.))))))))))))))))))).	4673	4703	1	-22.5	1	0.000218801	0.559	0	0	-5.77128	19	21	19	3UTR		0	0
hsa-miR-221-3p	XM_024452193	PPIL2	AGCTACATTGTCTGCTGGGTTTC#GAACCCAGGAGGCAGAGCTT#((((...((((((.((((((((.#)))))))).)))))))))).	1443	1463	1	-23.9	0	0.000313833	0.397	0	0	-12.3581	18	20	10	3UTR		0	0
hsa-miR-221-3p	XM_024453020	HECW2	AGCTACATTGTCTGCTGGGTTTC#AAGCTCAGCTCACAGTGTAGTA#.((((((((((..(((((((((.#)))))))))..)))))))))).	7607	7629	1	-26.5	1	0.00364429	0.603	0	0	-8.42926	19	22	10	3UTR		0	0
hsa-miR-221-3p	XM_024453202	IL18R1	AGCTACATTGTCTGCTGGGTTTC#AGACTCAGCACTCCGTCAGTGTTGCC#.((.((((((.(((((((((((.#))))))))))....).)))))).)).	2958	2984	1	-21	0	0.000481387	0.618	0	0	-9.65012	19	26	10	3UTR		0	0
hsa-miR-221-3p	XM_024453388	TIGIT	AGCTACATTGTCTGCTGGGTTTC#ACCCCACAGAGAGGGGGCAATGGGCAGTGTGGCTG#((((((((((((((((...((((#.))))...))))...)))))))))))).	3830	3865	1	-24.1	1	0.000111138	0.456	0	0	-3.93757	20	28	12	3UTR		0	0
hsa-miR-221-3p	XM_024453460	NKIRAS1	AGCTACATTGTCTGCTGGGTTTC#AGACTCAAGCAATGTGGCTG#((((((((((.((..(((((((.#))))))))))))))))))).	2420	2440	1	-20.4	1	0.00191107	0.662	0	0	-8.35464	19	20	19	3UTR		0	0
hsa-miR-221-3p	XM_024453846	IQSEC1	AGCTACATTGTCTGCTGGGTTTC#GCCCGGCGGAGCCCCCGCTGCCTTCCCATGGTCCAGTGAGCTG#((((.(((((((((((((((...#)))))))))).......................))))))))).	4675	4718	1	-23.7	0	0.000616969	0.338	0	0	-8.05661	19	43	10	3UTR		0	0
hsa-miR-221-3p	NM_014240	LIMD1	AGCTACATTGTCTGCTGGGTTTC#GAGCCCAGAGATAGTGGGTA#.(((.((((((((.((((((((.#))))))))))))))))))).	10608	10628	1	-23.1	0	0.000557498	0.544	0	0	-8.7692	19	20	19	3UTR		0	0
hsa-miR-221-3p	NM_014249	NR2E3	AGCTACATTGTCTGCTGGGTTTC#ACCCAGCAGAAATGCCCACCGAAAGATATTGTAAGAATATTCATAGCA#.((((((((.((((((((((...#)))))))))))))).............................)))).	1524	1572	1	-21.5	1	0.0523889	0.662	0.0843302	-0.0654123	-5.03583	18	48	14	3UTR		0	0
hsa-miR-221-3p	NM_014254	RXYLT1	AGCTACATTGTCTGCTGGGTTTC#AGCCTAGTGATGACATATGTATTGCA#.(((((((((((.((((((((..#))))))))...)))).)))))..)).	1610	1636	1	-18.7	1	0.00835172	0.603	1.97293	2.05302	-5.08246	19	26	8	3UTR		0	0
hsa-miR-221-3p	NM_014309	RBFOX2	AGCTACATTGTCTGCTGGGTTTC#GAGATCTAGCAGATAAGTGGG#..((((.((((((((((((((((#)))))))))))))))))))).	4679	4700	1	-26.6	0	0.000217221	0.662	0.292558	0.885759	-6.50069	20	21	20	3UTR		0	0
hsa-miR-221-3p	NM_014324	AMACR	AGCTACATTGTCTGCTGGGTTTC#GAAGCCCAGAAGATAGTGAGGCA#.(((.((((((((.(((((((((#))))))))).)))))))).))).	3397	3420	1	-28.3	0	0.000442884	0.515	3.83536	4.26599	-8.7692	20	23	9	3UTR		0	0
hsa-miR-221-3p	NM_014329	EDC4	AGCTACATTGTCTGCTGGGTTTC#GAAGGCCAGCAGACAGGCCTAGGCTG#((((...(((((((((((.((((#)))).))))))))))).....)))).	4453	4479	1	-27.5	0	6.8379e-06	0.338	0.66507	0.68701	-11.5013	19	26	11	3UTR		0	0
hsa-miR-221-3p	NM_014331	SLC7A11	AGCTACATTGTCTGCTGGGTTTC#GAACCCGGGAGGCGGAGGTTGCA#.((.((.((((((.((((((((.#)))))))).))))))..)).)).	3326	3349	1	-23.4	0	3.24395e-06	0.426	0.293071	-0.0128262	-9.22587	18	23	8	3UTR		0	0
hsa-miR-221-3p	NM_014332	SMPX	AGCTACATTGTCTGCTGGGTTTC#GAGACTCTAGCAGAAATGGCC#.((((.....(((((((((((((#))))).))))))))..)))).	563	584	1	-20.1	0	0.00216273	0.588	2.50636	3.35379	-11.8505	17	21	8	3UTR		0	0
hsa-miR-221-3p	NM_014334	FRRS1L	AGCTACATTGTCTGCTGGGTTTC#GAGACCAGCCTGGCCAATGTGGTG#.(((((((((((.(((.((((((#)))))))))..))).)))))))).	1705	1729	1	-22.2	1	0.000264911	0.515	0.109662	-0.0574882	-5.08246	20	24	9	3UTR		1	0
hsa-miR-221-3p	NM_014358	CLEC4E	AGCTACATTGTCTGCTGGGTTTC#GCTCAGAATACCGGTGTGGCC#.(((((((((....((((((...#)))))).....))))))))).	1282	1303	1	-18.7	1	0.000307743	0.485	-0.0771082	-0.140225	-12.1109	15	21	9	3UTR		0	0
hsa-miR-221-3p	NM_014381	MLH3	AGCTACATTGTCTGCTGGGTTTC#GATTTGCCAGGCTGTCAGGGGCTCTGCCTCCAGGCCCAGTGTGGCAGTGTGGCC#.(((((((((((((((((((((.#.)))))))))).))))))))))).	5941	5995	1	-30.8	1	1.11947e-05	0.279	0.73201	0.468467	-3.79332	21	24	11	3UTR		0	0
hsa-miR-221-3p	NM_014421	DKK2	AGCTACATTGTCTGCTGGGTTTC#GGACTCCTGAAGTAGACAGAGTAGTG#.(((((.(((((((((((((((.#))))))....))))))))).))))).	2808	2834	1	-21.5	0	0.0010177	0.574	3.92145	2.8908	-5.33701	20	26	9	3UTR	MIRT003362	1	0
hsa-miR-221-3p	NM_014424	HSPB7	AGCTACATTGTCTGCTGGGTTTC#GGGACCAGCAGGACATATGGGCA#.(((.(((((((((((.((((((#))))))))))).))).)))))).	892	915	1	-20.6	0	0.00158644	0.441	0.474741	-0.0758209	-7.91236	20	23	11	3UTR		0	0
hsa-miR-221-3p	NM_014478	CRCP	AGCTACATTGTCTGCTGGGTTTC#CCCAGCAGGCCTGGCTTTGTGGTTA#(((((((..((((((((((....#)))))))))).......))))))).	659	684	1	-24.1	1	6.49387e-05	0.618	0	0	-7.3076	17	25	10	3UTR		0	0
hsa-miR-221-3p	NM_014482	BMP10	AGCTACATTGTCTGCTGGGTTTC#GAAGCCTAGCAGTGTTCTGGCA#.((((......((((((((((((#)))))))))))).....)))).	5261	5283	1	-23.1	0	0.000335921	0.618	0	0	-14.6753	16	22	12	3UTR		0	0
hsa-miR-221-3p	NM_014565	OR1A1	AGCTACATTGTCTGCTGGGTTTC#AACCAAAACAGCATGGTACTGGTACCAAAACAGACATGTAGCC#.((((((.((((((...(((...#.)))....)))))))))))).	2814	2857	1	-19.8	1	0.115558	0.559	0	0	-7.07546	15	21	12	3UTR		0	0
hsa-miR-221-3p	NM_014568	GALNT5	AGCTACATTGTCTGCTGGGTTTC#GAAACCCATATTCATTGTGGTA#.((((((.((..((.((((((((#))))))))))..)).)))))).	9807	9829	1	-20	1	0.000312571	0.676	0	0	-13.014	18	22	10	3UTR		0	0
hsa-miR-221-3p	NM_014571	HEYL	AGCTACATTGTCTGCTGGGTTTC#GACACCCAGTGGGACCAGTGTTGCC#.((.((((((((((((((((.((#)).))))))))))..)))))).)).	2252	2277	1	-23.5	0	0.000119486	0.456	0	0	-6.82535	20	25	10	3UTR		0	0
hsa-miR-221-3p	NM_014594	ZNF354C	AGCTACATTGTCTGCTGGGTTTC#TAGTAGATAATGTGGTA#.((((((((((((((((......#)))))))))))))))).	5180	5197	1	-22.1	1	0.0926739	0.691	0	0	-3.79332	16	17	16	3UTR		0	0
hsa-miR-221-3p	NM_014650	ZNF432	AGCTACATTGTCTGCTGGGTTTC#CCTAGCATACATGCATATAGGCAGTGTAGA#..(((((((((((((((((....#)))))))............)))))))))).	2707	2737	1	-22	1	0.0164075	0.515	0	0	-4.957	17	30	10	3UTR		0	0
hsa-miR-221-3p	NM_014654	SDC3	AGCTACATTGTCTGCTGGGTTTC#CAGTGACAGTGTGGCC#.(((((((((((.((((......#))))))))))))))).	2419	2435	1	-22	1	8.12293e-07	0.485	0	0	-5.08246	15	16	15	3UTR		0	0
hsa-miR-221-3p	NM_014683	ULK2	AGCTACATTGTCTGCTGGGTTTC#GCCCACCAGGCAGTCTGGCTT#(((((.((((((((.(((((...#))))).)))))))).))))).	8584	8605	1	-24.1	0	9.10129e-07	0.515	0	0	-6.57398	18	21	8	3UTR		0	0
hsa-miR-221-3p	NM_014692	SEC14L5	AGCTACATTGTCTGCTGGGTTTC#GGAGCACCAGCAGAATGGGGTC#.(((.(((..(((((((((((((#))))).))))))))))).))).	3722	3744	1	-21.8	0	0.000273584	0.5	0	0	-10.2113	19	22	11	3UTR		0	0
hsa-miR-221-3p	NM_014700	RAB11FIP3	AGCTACATTGTCTGCTGGGTTTC#AAGCATGGACTCCCAGGAGACAGTGTGGG#..(((((((((((.(((((..((#.))..))))).))))))))))).	4150	4179	1	-29.2	1	8.62822e-07	0.485	0	0	-5.81384	18	23	11	3UTR		0	0
hsa-miR-221-3p	NM_014702	KIAA0408	AGCTACATTGTCTGCTGGGTTTC#GAACCCGGGAGGCAGAGCTT#((((...((((((.((((((((.#)))))))).)))))))))).	6105	6125	1	-23.2	0	0.00274293	0.397	0	0	-12.3581	18	20	10	3UTR		0	0
hsa-miR-221-3p	NM_014728	FRMPD4	AGCTACATTGTCTGCTGGGTTTC#GCCCTATGTCAGACAGTGTGCTA#(((.(((((((((((.((((...#))))...).))))))))))))).	7604	7627	1	-23.1	0	0.00127763	0.691	0	0	-7.20265	18	23	13	3UTR		0	0
hsa-miR-221-3p	NM_014734	SUSD6	AGCTACATTGTCTGCTGGGTTTC#AGGCCTAGCAGGGAAGCAGCA#.(((.(.((.((((((((((((.#)))))))))))).))).))).	4700	4721	1	-22.4	0	0.000407119	0.5	0	0	-10.6986	18	21	12	3UTR		0	0
hsa-miR-221-3p	NM_014736	PCLAF	AGCTACATTGTCTGCTGGGTTTC#GGAGACCAGCCCAGGCAACATAGCG#.((((..(((((((((((..(((#)))..)))))..))))))..)))).	1083	1108	1	-21.3	0	0.003287	0.544	0	0	-7.23797	18	25	6	3UTR		0	0
hsa-miR-221-3p	NM_014754	PTDSS1	AGCTACATTGTCTGCTGGGTTTC#GGGGCCCAGTGCTCAATAGTAGA#..((((((((..(((((((((((#)))))))))))..)))).)))).	3033	3056	1	-21.8	1	0.0187315	0.412	0	0	-11.1286	19	23	11	3UTR		0	0
hsa-miR-221-3p	NM_014755	SERTAD2	AGCTACATTGTCTGCTGGGTTTC#AGCTCAGTAGAGCAGTGAGA#..((.((((((((((((((((..#))))))))))).))))))).	3344	3364	1	-21	0	0.00015741	0.618	0	0	-9.07604	18	20	11	3UTR		0	0
hsa-miR-221-3p	NM_014797	ZBTB24	AGCTACATTGTCTGCTGGGTTTC#GAGCCTCAGAGACTTTGTAGCC#.((((((..((((.((((((((.#))))).)))))))..)))))).	3461	3483	1	-24.2	1	0.000363423	0.662	0	0	-8.02019	18	22	7	3UTR		0	0
hsa-miR-221-3p	NM_014805	EPM2AIP1	AGCTACATTGTCTGCTGGGTTTC#ACCCGGCGGCAAAACTGGCTT#(((((..(((.(((((((((...#))))))))))))...))))).	6625	6646	1	-21.5	0	0.000716703	0.529	0	0	-10.207	17	21	12	3UTR		0	0
hsa-miR-221-3p	NM_014865	NCAPD2	AGCTACATTGTCTGCTGGGTTTC#GAACCCAGAGGCGGAGGTTGTAGTG#.((((((.(.((((((((((((.#)))))))...))))).).)))))).	4593	4618	1	-23.9	1	1.82456e-06	0.441	0	0	-7.34947	19	25	7	3UTR		0	0
hsa-miR-221-3p	NM_014880	CD302	AGCTACATTGTCTGCTGGGTTTC#AAACCTACACAGCATGTTACTGTGCTGAATACTGCAGACAATTGTAA#...((((((((((((.((..(((#.)))..))))))))))).))).	1809	1856	1	-18.5	0	0.0110648	0.691	0.168274	0.0736763	-6.74759	17	22	11	3UTR		0	0
hsa-miR-221-3p	NM_014929	FASTKD2	AGCTACATTGTCTGCTGGGTTTC#AACCTGGCAGATAAAAAGGCA#.(((...((((((((((((((..#))))))))))))))...))).	4158	4179	1	-22.7	0	0.00352128	0.632	0	0	-11.357	17	21	14	3UTR		0	0
hsa-miR-221-3p	NM_014932	NLGN1	AGCTACATTGTCTGCTGGGTTTC#AAACTCAGCAGATAAA#.......(((((((((((((((.#))))))))))))))).	8674	8690	1	-20.9	0	0.319882	0.662	0	0	-17.1102	15	16	15	3UTR		0	0
hsa-miR-221-3p	NM_014955	EEF1AKNMT	AGCTACATTGTCTGCTGGGTTTC#GAGACCTGGCAGACTAAAGTCTCTAGTGTTTGTTTGCTCACATTTGCTGAGTGACAGCTA#(((((((((((((((((((((((#))))))))))))))..........)))))..........................)))).	2745	2805	1	-23.6	1	6.75274e-05	0.529	0	0	-3.93757	23	60	14	3UTR		0	0
hsa-miR-221-3p	NM_014979	SV2C	AGCTACATTGTCTGCTGGGTTTC#AGCCTTCAGCAGGCAGTGCAGG#..((.((((((((((((((((..#))))..)))))))))))).)).	7477	7499	1	-23.4	0	0.000294056	0.632	0	0	-9.07604	18	22	12	3UTR		0	0
hsa-miR-221-3p	NM_015016	MAST3	AGCTACATTGTCTGCTGGGTTTC#ACCCAGCAGGAGTCGTGGCA#.((((((((.((((((((((...#))))))))))))).))))).	5594	5614	1	-25.6	1	1.04326e-05	0.382	0	0	-5.03583	18	20	13	3UTR		0	0
hsa-miR-221-3p	NM_015021	ZNF292	AGCTACATTGTCTGCTGGGTTTC#ACCCAGCTAATTTTGTAGTTT#(((((((..((..(((((((...#)))))))..))..))))))).	11669	11690	1	-21.3	1	0.00367242	0.559	0.297489	0.0357383	-11.9435	16	21	7	3UTR		0	0
hsa-miR-221-3p	NM_015024	XPO7	AGCTACATTGTCTGCTGGGTTTC#CCCAGCCCTCGAGGCAGTGTGTGTG#.((((((((((((((((((....#)))))).....)))))))))).)).	4345	4370	1	-22.5	1	0.00030238	0.574	2.47333	1.65029	-3.79332	18	25	10	3UTR		0	0
hsa-miR-221-3p	NM_015029	POP1	AGCTACATTGTCTGCTGGGTTTC#GGAGCCCTTTGTAGGACCAGTGTTCTTAGTAGCGCGCTTTGGGCAGTGTGGCTG#(((((((((((((((((((((((#))))))).......................))).......))))))))))))).	4059	4113	1	-25.8	1	9.03476e-06	0.471	0	0	-3.93757	23	54	13	3UTR		0	0
hsa-miR-221-3p	NM_015044	GGA2	AGCTACATTGTCTGCTGGGTTTC#AGGCCTGGTAGTCAGGTGGCTC#((((((.(((.(((((((((((.#))))))))))).))))))))).	4610	4632	1	-23.9	0	2.13718e-05	0.456	1.20015	1.08578	-8.30604	20	22	11	3UTR		1	0
hsa-miR-221-3p	NM_015071	ARHGAP26	AGCTACATTGTCTGCTGGGTTTC#CCCGGAGACAGCAGTGGCC#.(((((.((((((.(((((....#)))))))))))..))))).	7540	7559	1	-21.3	0	5.48128e-05	0.426	0	0	-6.19385	16	19	11	3UTR		0	0
hsa-miR-221-3p	NM_015088	TNRC6B	AGCTACATTGTCTGCTGGGTTTC#GACCTAGCAGTAGAGTGGAGCA#.(((.((((.(((((((((((..#)))))))))).).)))).))).	6348	6370	1	-24.3	0	0.000116606	0.515	0	0	-9.15487	18	22	10	3UTR		0	0
hsa-miR-221-3p	NM_015113	ZZEF1	AGCTACATTGTCTGCTGGGTTTC#GAAGCCCGCAGAGCAAAGGTGGA#..((((.((((((((.(((((((#)))))))))))).)))..)))).	11174	11197	1	-23.6	0	0.00208282	0.412	0	0	-6.73374	19	23	12	3UTR		0	0
hsa-miR-221-3p	NM_015116	LRCH1	AGCTACATTGTCTGCTGGGTTTC#GGGGCCCCGCAGAACTACAATGTAT#...((((((((((((.(((((((#))))))).)))))....))))))).	5098	5123	1	-22.9	0	0.156485	0.544	0	0	-6.74759	19	25	7	3UTR		0	0
hsa-miR-221-3p	NM_015123	FRMD4B	AGCTACATTGTCTGCTGGGTTTC#GAAGCTCAGGGCCAGGCATAGCGGCTC#((((.(..(((((((((((((((#)))))))))...))))))..).)))).	5399	5426	1	-21.7	0	0.000704503	0.441	0	0	-11.9139	20	27	9	3UTR		0	0
hsa-miR-221-3p	NM_015138	RTF1	AGCTACATTGTCTGCTGGGTTTC#GAAGCCAGCAGAGGTGTGTGTA#.(((((((..((((((((.(((.#))).)))))))).))))).)).	3639	3661	1	-22	1	0.0019696	0.588	0	0	-6.09222	18	22	8	3UTR		0	0
hsa-miR-221-3p	NM_015139	SLC35D1	AGCTACATTGTCTGCTGGGTTTC#AGGCCCTCAGCAAATGTGGCTA#(((((((((..(((..((((((.#)))))).)))..))))))))).	4897	4919	1	-22	1	0.00047465	0.559	0	0	-8.97335	18	22	9	3UTR		0	0
hsa-miR-221-3p	NM_015140	TTLL12	AGCTACATTGTCTGCTGGGTTTC#GCCCAGGCAGGCGAGAGCTA#((((.(.(((((((((((((...#)))))).)))))))))))).	3068	3088	1	-24	0	0.000978352	0.368	0	0	-9.6003	18	20	12	3UTR		0	0
hsa-miR-221-3p	NM_015143	METAP1	AGCTACATTGTCTGCTGGGTTTC#GAACCCAGGAGGTCAAGTGGGCTA#((((...((((((.((((((((.#)))))))).))).)))...)))).	2131	2155	1	-23.6	0	0.00154793	0.574	0	0	-12.3581	18	24	8	3UTR		0	0
hsa-miR-221-3p	NM_015174	ZFR2	AGCTACATTGTCTGCTGGGTTTC#GAGCCCAGCGGTTTAAGATCAGTCTGGGCAATATGGTG#.((((.((((((((((((((((.#)))))))))................))))))).)))).	3684	3722	1	-22.1	0	0.000542814	0.529	3.43826	2.20054	-5.69428	20	38	9	3UTR		0	0
hsa-miR-221-3p	NM_015176	FBXO28	AGCTACATTGTCTGCTGGGTTTC#AAACCCAGTCTTGACAGACTAGA#..(((..(((((.(((((((((.#)))))))))...)))))..))).	1451	1474	1	-18.6	0	0.000571728	0.647	0	0	-9.69078	17	23	9	3UTR	MIRT024194	1	1
hsa-miR-221-3p	NM_015191	SIK2	AGCTACATTGTCTGCTGGGTTTC#CCCAGTGCAGATAATGGGCTG#((((.((((((((((((((....#))))..)))))))))))))).	9018	9039	1	-23.9	0	7.66883e-06	0.485	0	0	-8.05661	18	21	14	3UTR		0	0
hsa-miR-221-3p	NM_015199	ANKRD28	AGCTACATTGTCTGCTGGGTTTC#TTCAGGAGATCTCTAAGTGTAGCTG#(((((((((((((.(((((....#))))).)))).....))))))))).	6514	6539	1	-19.9	1	0.00110558	0.662	0	0	-4.79441	18	25	9	3UTR	MIRT046912	0	0
hsa-miR-221-3p	NM_015247	CYLD	AGCTACATTGTCTGCTGGGTTTC#GAAGGTCCTCCTCCTCCCTGATTGTAGCATCCAGCAGTCTCTGTAGCC#.((((((..(.(((((((((...#.))))))))).)..)))))).	7989	8037	1	-25.7	1	7.31196e-05	0.515	0	0	-9.98812	16	21	9	3UTR		0	1
hsa-miR-221-3p	NM_015254	KIF13B	AGCTACATTGTCTGCTGGGTTTC#ACCCAGCAGCGGCCTCCTGTAGCA#.(((((((((.(((((((((...#)))))))))))).....)))))).	7428	7452	1	-25.2	1	0.000882536	0.368	0	0	-6.6181	18	24	12	3UTR		0	0
hsa-miR-221-3p	NM_015258	FKBP15	AGCTACATTGTCTGCTGGGTTTC#GGACCTGGGAGGCAGTGAGA#..((.((((((((.((((((((.#)))))))).)))))))))).	4847	4867	1	-22.4	0	2.46104e-06	0.559	0.331677	0.235632	-9.93288	18	20	10	3UTR		0	0
hsa-miR-221-3p	NM_015278	SASH1	AGCTACATTGTCTGCTGGGTTTC#GAAACCTGGAAAGGCAGTTCGGCTCAGGTAGCTA#(((((((((((((.(((((((((#)))))))))..))))))).........)))))).	6766	6800	1	-23.8	1	0.000144876	0.588	0	0	-4.79441	22	34	9	3UTR		0	0
hsa-miR-221-3p	NM_015305	ANGEL1	AGCTACATTGTCTGCTGGGTTTC#GCCTCAGCAGAAAGGTGGCC#.(((((....((((((((((...#))).)))))))...))))).	3243	3263	1	-22.9	0	3.59556e-05	0.529	3.32318	2.65989	-9.94954	15	20	7	3UTR		0	0
hsa-miR-221-3p	NM_015332	NUDCD3	AGCTACATTGTCTGCTGGGTTTC#GAAACCCAGGTACCTGTCAGGGAATGGGCTA#((((.((((.(((((((((((((#)))))))))........)))).)))))))).	6629	6660	1	-24.4	0	0.000848239	0.441	0.0871202	0.369477	-9.29912	21	31	9	3UTR		0	0
hsa-miR-221-3p	NM_015351	TTC9	AGCTACATTGTCTGCTGGGTTTC#CCCAAAGCAATTGGCCGTTTGTCCAGTGGCAGACAATGGTGGCTA#(((((((((((((((((((....#.))))...)))))))))).))))).	1857	1902	1	-24.8	1	0.00102423	0.471	0.513873	0.46036	-3.93757	19	25	10	3UTR		0	0
hsa-miR-221-3p	NM_015359	SLC39A14	AGCTACATTGTCTGCTGGGTTTC#GGAGCCCAGGGGCCATGTTTGCA#.((.((((.((((.(((((((((#))))))))))))).))))..)).	3090	3113	1	-23.3	0	4.3155e-05	0.441	0.252628	0.58468	-8.73858	19	23	13	3UTR		0	0
hsa-miR-221-3p	NM_015376	RASGRP3	AGCTACATTGTCTGCTGGGTTTC#GAAATACTGCAGATGATGTGAAGTTA#(((((((((((((((...(((((#)))))...)))))))))))..)))).	3915	3941	1	-19.6	1	0.00162872	0.603	0.423312	0.105601	-4.17062	20	26	11	3UTR		0	0
hsa-miR-221-3p	NM_015415	MPC2	AGCTACATTGTCTGCTGGGTTTC#CTCAGTAACTGATAATGTAGCA#.((((((((((((((((((....#)))))))...))))))))))).	1123	1145	1	-23.5	1	0.00206306	0.691	0.18878	0.0297522	-3.79332	18	22	11	3UTR		0	0
hsa-miR-221-3p	NM_015471	NSL1	AGCTACATTGTCTGCTGGGTTTC#GCCCAGAGACAAGGTGGA#..((((.((((((.((((((...#)))))))))))).)))).	12691	12709	1	-22.5	0	0.0005641	0.456	1.20518	2.28697	-7.35753	16	18	12	3UTR		0	0
hsa-miR-221-3p	NM_015545	PTCD1	AGCTACATTGTCTGCTGGGTTTC#GAACCCAGGAGGCGGAGGTTGTAGTG#.((((((((((((.((((((((.#)))))))).))))))....)))))).	5047	5073	1	-25.7	1	0.000815427	0.412	2.88082	1.31783	-4.65016	20	26	8	3UTR		0	0
hsa-miR-221-3p	NM_015589	SAMD4A	AGCTACATTGTCTGCTGGGTTTC#GAGAGCCAGCAAGCAAAATAGATGTGGCTG#(((((((((((.((((((.((((#)))).)))))).)))......)))))))).	6030	6060	1	-26.1	1	0.0010807	0.471	0	0	-7.28438	21	30	8	3UTR		0	0
hsa-miR-221-3p	NM_015617	PYGO1	AGCTACATTGTCTGCTGGGTTTC#GAAACTCAGTGGATAAGCA#.(((....(((((((((((((((#)))))))))))))))))).	6292	6311	1	-21.6	0	0.00679511	0.765	0.554929	0.149008	-13.6706	18	19	18	3UTR		0	0
hsa-miR-221-3p	NM_015642	ZBTB20	AGCTACATTGTCTGCTGGGTTTC#AGGGCCAGTGGGCAGTGATAGCA#.(((((((((((((((((.(((.#))).))))))))))))).)))).	20156	20179	1	-26.7	1	0.000468403	0.397	0.0840231	0.234074	-3.79332	20	23	13	3UTR		0	1
hsa-miR-221-3p	NM_015646	RAP1B	AGCTACATTGTCTGCTGGGTTTC#GAACCCAGGAGGCAGAGGGTGCAGTAGCTG#((((((.((((((.((((((((.#)))))))).))))))........)))))).	11205	11235	1	-26.1	0	1.96047e-05	0.426	0.165961	-0.00872439	-6.3381	20	30	8	3UTR		0	0
hsa-miR-221-3p	NM_015679	TRUB2	AGCTACATTGTCTGCTGGGTTTC#GAACCCAGGAGGTGGAGGTTGCAGTGAGCTG#((((.((((((((.((((((((.#)))))))).)).........)))))))))).	5106	5137	1	-24	0	8.81013e-05	0.5	2.6733	2.42836	-8.91345	20	31	10	3UTR		0	0
hsa-miR-221-3p	NM_015693	INTU	AGCTACATTGTCTGCTGGGTTTC#AGAGCCAGCAGGCAGAGAAGACTA#((((.(.(((((((((((.(((.#))).))))))))))).).)).)).	9001	9025	1	-22.8	0	0.00569399	0.5	0.304039	0.0401001	-9.6003	19	24	11	3UTR		0	0
hsa-miR-221-3p	NM_015694	ZNF777	AGCTACATTGTCTGCTGGGTTTC#ACTCAGAGGGGCGGTGTAGG#..(((((((((((.((((((...#))))))..))))))))))).	3066	3086	1	-22.1	1	2.36989e-05	0.426	0.244836	1.14081	-5.81384	17	20	11	3UTR		0	0
hsa-miR-221-3p	NM_015727	TACR1	AGCTACATTGTCTGCTGGGTTTC#AAACCCAGCTGTGAGACAAGAGGGACAAGTGGG#..((((.(((((((((((((((.#))))))))).............)))))))))).	1601	1634	1	-22.7	0	0.00871346	0.529	0.899601	0.0898545	-6.50069	19	33	10	3UTR		0	0
hsa-miR-221-3p	NM_015840	ADAR	AGCTACATTGTCTGCTGGGTTTC#GGAGCCTGCAGATAATGCCCAGCC#.(((.((((((((((.(((((((#)))))))))))))))))...))).	4383	4407	1	-24.8	0	0.0114258	0.441	2.63898	3.93505	-8.14541	20	24	17	3UTR		0	0
hsa-miR-221-3p	NM_015871	ZNF593	AGCTACATTGTCTGCTGGGTTTC#GCCCATGGACAGTGACGCA#.((..(((((((((.(((((...#))))))))))))))..)).	511	530	1	-20.4	0	0.00758287	0.397	1.37354	0.508572	-11.6798	16	19	14	3UTR		0	0
hsa-miR-221-3p	NM_015879	ST8SIA3	AGCTACATTGTCTGCTGGGTTTC#GAAAAATTGGCAGACAATGG#.....(((((((((((((.((((#))))..))))))))))))).	8763	8783	1	-19.8	0	0.019331	0.574	-0.0134188	0.0592653	-13.6656	17	20	13	3UTR		0	0
hsa-miR-221-3p	NM_015884	MBTPS2	AGCTACATTGTCTGCTGGGTTTC#GAGATGCAGCCCTGGGAAATTTGGGGAGTCAGCAGGCCAGTGTGAAGCTA#((((((((((((((((((.((((#.)))).))))))))).)))))..)))).	2881	2931	1	-25.8	1	0.00240499	0.5	0.155293	0.302623	-3.93757	22	28	9	3UTR		0	0
hsa-miR-221-3p	NM_015910	WDPCP	AGCTACATTGTCTGCTGGGTTTC#GAGCCCAGGAGTTCAAGGCTACAGTGAGCTG#((((.((((((((.((((((((.#)))))))).)).........)))))))))).	2969	3000	1	-23.7	0	3.51773e-05	0.441	4.30431	4.15315	-8.91345	20	31	10	3UTR		0	0
hsa-miR-221-3p	NM_015913	TXNDC12	AGCTACATTGTCTGCTGGGTTTC#GAAGCTGGTCTGCATGTTTGTGGATCCAGCGGAGAGTGGCA#.(((((..(.((((((((((((.#.)))))))))))).)))))).	774	815	1	-25	0	9.21295e-08	0.485	1.153	1.57833	-8.89315	18	21	12	3UTR		0	0
hsa-miR-221-3p	NM_015969	MRPS17	AGCTACATTGTCTGCTGGGTTTC#GCCTAGCAGTCTGTTGCA#.((.(((..(.(((((((((...#))))))))).)))).)).	692	710	1	-19.4	0	0.0026706	0.618	-0.0303522	0.00509922	-13.0201	15	18	9	3UTR		0	0
hsa-miR-221-3p	NM_016009	SH3GLB1	AGCTACATTGTCTGCTGGGTTTC#ACTCAGTAGAGCAGTGATTGGCA#.(((((((((((((((((((...#)))))))))).)))))..)))).	5074	5097	1	-22.8	1	0.0064187	0.559	0.199228	-0.169681	-3.79332	19	23	10	3UTR		0	0
hsa-miR-221-3p	NM_016039	RTRAF	AGCTACATTGTCTGCTGGGTTTC#GCCCAGCAGAGCAGTTTAGA#..(((.((((((((((((((...#)))))))))).)))).))).	4130	4150	1	-24.1	0	0.0281334	0.529	4.79937	1.69464	-6.85796	17	20	10	3UTR		0	0
hsa-miR-221-3p	NM_016072	GOLT1B	AGCTACATTGTCTGCTGGGTTTC#GAAACTCAGCCATCCTTAGAGAACTGTGGTG#.((((((((.(((((((((((((#)))))))))).......))).)).)))))).	844	875	1	-21.7	1	0.0114492	0.588	0.802779	0.956582	-5.03583	21	31	10	3UTR		0	0
hsa-miR-221-3p	NM_016079	CHMP3	AGCTACATTGTCTGCTGGGTTTC#ACCCAGATGAGACAGCTGTAGTA#.((((((((((((.((((((...#))))))...)))))).)))))).	1441	1464	1	-23.2	1	0.000442769	0.515	0.191504	0.0764903	-4.65016	18	23	6	3UTR		0	0
hsa-miR-221-3p	NM_016094	COMMD2	AGCTACATTGTCTGCTGGGTTTC#GAGCCTAGCAGGGAATAGGCTA#((((..(((.((((((((((((.#)))))))))))).))).)))).	2204	2226	1	-24.3	0	0.0012794	0.588	0.260783	0.432385	-11.2001	19	22	12	3UTR		0	0
hsa-miR-221-3p	NM_016132	MYEF2	AGCTACATTGTCTGCTGGGTTTC#GAAACTAATTGAAACTTTAGGGCAGACAATGTAA#...((((((((((((((((((((#.)))))))...))))))))))))).	5959	5993	1	-25.2	0	0.0119001	0.662	-0.15693	0.617025	-6.51454	20	25	13	3UTR		1	0
hsa-miR-221-3p	NM_016183	MRTO4	AGCTACATTGTCTGCTGGGTTTC#GAGCCCAGAAGTTTGAAACCAGCCTGGGCAATTCAGCA#.(((..((((((((((.((((((#.)))))))))..)))))))..))).	1284	1322	1	-20.5	0	0.000983746	0.588	-0.0138662	-0.0846886	-9.81332	19	25	9	3UTR		0	0
hsa-miR-221-3p	NM_016200	LSM8	AGCTACATTGTCTGCTGGGTTTC#GAATCCAGGAGTCAGGGTGGGTG#(.((((.(((.((.((((((((.#)))))))).)).))).)))).).	5635	5658	1	-20.6	0	0.00377079	0.544	0.107442	-0.0225925	-10.3266	18	23	8	3UTR		0	0
hsa-miR-221-3p	NM_016220	ZNF107	AGCTACATTGTCTGCTGGGTTTC#GAAACCCTGCAAATGTGAATAATGTGGCA#.((((((((((((((.(((((((#))))))).))).....)).))))))))).	3851	3880	1	-24.8	1	0.0079305	0.632	0	0	-4.02637	21	29	9	3UTR		0	0
hsa-miR-221-3p	NM_016231	NLK	AGCTACATTGTCTGCTGGGTTTC#GAGCCCAAGAAGACACTGGTGTGA#...((((((((((.((((((((.#))))))).).)))))...))))).	3392	3416	1	-17.5	0	0.0045055	0.603	4.02825	3.55694	-7.37138	18	24	7	3UTR		1	1
hsa-miR-221-3p	NM_016298	FBXO40	AGCTACATTGTCTGCTGGGTTTC#CCCAGCAGTCCTAGCAGTCCTCAAGCAAGTGGG#..((((.((((((((((((....#))))))))................)))))))).	4316	4349	1	-19.5	0	0.000176419	0.529	0.249477	0.248874	-6.50069	16	33	8	3UTR		0	0
hsa-miR-221-3p	NM_016305	SS18L2	AGCTACATTGTCTGCTGGGTTTC#ACCCAGCTTTGATGTGGTA#.((((((((....(((((((...#)))))))...)))))))).	1491	1510	1	-21.9	1	0.000762973	0.676	0	0	-12.4965	15	19	8	3UTR		0	0
hsa-miR-221-3p	NM_016308	CMPK1	AGCTACATTGTCTGCTGGGTTTC#GAGCCTGGCAGAATTGTCAGCTT#(((((((...((((((((((((.#))))))))))))..))).)))).	1482	1505	1	-22.4	1	9.97951e-05	0.485	0.940961	0.648502	-8.55011	19	23	12	3UTR		0	0
hsa-miR-221-3p	NM_016321	RHCG	AGCTACATTGTCTGCTGGGTTTC#GAGCTCTCCCAGGAGACAACTTAGCTG#(((((..((((((.(((((....#.))))).))))))..))))).	1784	1811	1	-25.3	0	0.000984978	0.441	4.13692	2.8912	-8.23906	16	21	6	3UTR		0	0
hsa-miR-221-3p	NM_016351	ADAM22	AGCTACATTGTCTGCTGGGTTTC#GAACAGAAGGGCAGACAGATTGAAAGATGTAGCA#.(((((((((((((((..((((.#)))).....)))))))).........))))))).	4814	4848	1	-21.4	1	0.125414	0.603	0	0	-3.79332	19	34	8	3UTR		1	1
hsa-miR-221-3p	NM_016390	SPOUT1	AGCTACATTGTCTGCTGGGTTTC#GAGCCTAGCGGGGAATGC#.....((((.((((((((((((.#)))))))))))).)))).	3546	3564	1	-22.7	0	0.000411889	0.412	1.44752	3.43264	-14.9081	16	18	12	3UTR		0	0
hsa-miR-221-3p	NM_016403	CWC15	AGCTACATTGTCTGCTGGGTTTC#ACCCCAGGCGTGTGTCTG#((.((((.((((((..((((...#)))))))))))))).)).	1275	1293	1	-15.1	0	9.50968e-08	0.441	5.87477	4.67365	-8.77725	16	18	14	3UTR		0	0
hsa-miR-221-3p	NM_016454	EMC4	AGCTACATTGTCTGCTGGGTTTC#CCTAGAAGGACAATGTGCA#.((.(((((((((.(((((....#)))))..))))))))))).	798	817	1	-21.4	0	0.00418969	0.559	0.796404	0.701337	-7.68219	16	19	11	3UTR		0	0
hsa-miR-221-3p	NM_016466	ANKRD39	AGCTACATTGTCTGCTGGGTTTC#GAAGCGAGGGAGTAGATTTGGTGTGGCTA#((((((((((((((((..(((((#))))).....)))))))..))))))))).	718	747	1	-22.4	1	0.00424316	0.544	2.67366	2.14375	-3.93757	21	29	9	3UTR		0	0
hsa-miR-221-3p	NM_016488	PPHLN1	AGCTACATTGTCTGCTGGGTTTC#GAATTCCACTCACTTCCTGGTCACTTCAGCAGCCCAGCGGCATTGAGCC#.(((.((.((.((((((((((..#.)))))))))))).))))).	2364	2413	1	-24.5	0	0.000121805	0.544	0.500791	0.633387	-13.0508	17	20	12	3UTR		0	0
hsa-miR-221-3p	NM_016530	RAB8B	AGCTACATTGTCTGCTGGGTTTC#AAGCTCCTGCAGATAAGTGGA#..((((.((((((((.((((((.#)))).)).)))))))))))).	4629	4650	1	-20.1	0	0.000507301	0.574	0	0	-6.73374	18	21	12	3UTR		0	0
hsa-miR-221-3p	NM_016538	SIRT7	AGCTACATTGTCTGCTGGGTTTC#GAATCCTCTCTGTACTGGATGTGCGGCAGAGGGGTGGCTC#((((((.((.(((((((.(..((#.))..).))))))).)))))))).	1630	1670	1	-21.1	0	3.47198e-05	0.441	0	0	-6.72377	18	24	8	3UTR		0	0
hsa-miR-221-3p	NM_016542	STK26	AGCTACATTGTCTGCTGGGTTTC#GAAGCATTTACAGGCAATGTACAGCA#.(((((((((((((....(((((#))))).....))))))))))..))).	2061	2087	1	-19.9	1	0.000261084	0.588	1.4915	1.32718	-4.76182	18	26	10	3UTR		0	0
hsa-miR-221-3p	NM_016571	LGSN	AGCTACATTGTCTGCTGGGTTTC#ACCCTTCCTGCTGAGTGGCCTACAGATAATGTGGCTA#((((((((((((((.((((((..#.)))))))))))))))))))).	3856	3893	1	-27.8	1	0.00292585	0.485	1.20984	0.240994	-4.67302	20	22	20	3UTR		0	0
hsa-miR-221-3p	NM_016577	RAB6B	AGCTACATTGTCTGCTGGGTTTC#CCCAGCAGTGTGTGGTTT#((((((((...((((((((....#)))))))).)))))))).	5286	5304	1	-23.4	1	0.00351196	0.456	1.64984	1.21223	-9.06125	16	18	8	3UTR		0	0
hsa-miR-221-3p	NM_016603	FAM13B	AGCTACATTGTCTGCTGGGTTTC#AACCCACCTCCAGATAATGTGA#...(((((((((((.((((((..#))))))....))))))))))).	4057	4079	1	-19.6	0	0.00909785	0.529	1.27924	2.83485	-7.24999	17	22	11	3UTR		0	0
hsa-miR-221-3p	NM_016604	KDM3B	AGCTACATTGTCTGCTGGGTTTC#ACCCAGAGCCAGTGTGGTC#.(((((((((.((.((((((...#)))))))).))))))))).	5493	5512	1	-22.9	1	0.00115027	0.441	3.45536	2.64867	-7.47494	17	19	9	3UTR		0	0
hsa-miR-221-3p	NM_016621	PHF21A	AGCTACATTGTCTGCTGGGTTTC#GAGACCAGCTGGCTTTGTAGTC#.((((((..(((.(((.((((((#))))))))).)))..)))))).	5739	5761	1	-23.4	1	3.79312e-05	0.441	4.53246	5.25152	-8.45248	18	22	9	3UTR	MIRT046927	0	0
hsa-miR-221-3p	NM_016641	GDE1	AGCTACATTGTCTGCTGGGTTTC#GAGACCCAGTGAGGATAAGCA#.(((..(((.((.((((((((((#)))))))))))).))).))).	1401	1422	1	-22.1	0	0.0201903	0.515	0.827672	0.978882	-12.345	18	21	12	3UTR		0	0
hsa-miR-221-3p	NM_016834	MAPT	AGCTACATTGTCTGCTGGGTTTC#GAAACTTGGTGTGTTCGTGGAGCCACAGGCAGACGATGTC#....(((((((((((((((((((#.)))))).))).)))))))))).	1749	1789	1	-25.3	0	3.15873e-05	0.441	-0.439986	-0.10593	-9.54656	19	23	10	3UTR		0	0
hsa-miR-221-3p	NM_016929	CLIC5	AGCTACATTGTCTGCTGGGTTTC#CTCAGCAACAGTGTGGTG#.((((((((((.(((((((....#))))))))))))))))).	3702	3720	1	-23.1	1	0.00045304	0.515	-0.0209608	-0.0362286	-7.14013	17	18	17	3UTR		0	0
hsa-miR-221-3p	NM_017425	SPA17	AGCTACATTGTCTGCTGGGTTTC#AGGTCAGTGGTAATGTAGCTA#((((((((((.(((((((.((..#)).))))))))))))))))).	3338	3359	1	-21.9	1	0.00182108	0.559	0	0	-6.76235	19	21	17	3UTR		0	0
hsa-miR-221-3p	NM_017437	CPSF2	AGCTACATTGTCTGCTGGGTTTC#GGGACCCAGTGGGCAGTAATTTAATCATGGTGGTGGTTA#(((((((((((((((((((((((#)))))))))))))))))...............)))))).	4487	4526	1	-27.3	1	0.000163655	0.515	0.028702	0.126392	-3.93757	23	39	17	3UTR		0	0
hsa-miR-221-3p	NM_017510	TMED9	AGCTACATTGTCTGCTGGGTTTC#ACTGAGCAGGTAGTGGGGCA#.(((.(((((((((((.(((...#))).))))))))))).))).	883	903	1	-21.3	0	0.00162275	0.426	0.439369	0.389478	-7.91236	17	20	11	3UTR		0	0
hsa-miR-221-3p	NM_017554	PARP14	AGCTACATTGTCTGCTGGGTTTC#TCCAGGAGCTGTGATGTGGCTG#((((((((((.((.(((((....#))))).))...)))))))))).	6169	6191	1	-20.7	1	0.00160389	0.382	0.167293	-0.0691819	-7.61919	17	22	10	3UTR		0	0
hsa-miR-221-3p	NM_017653	DYM	AGCTACATTGTCTGCTGGGTTTC#GAGCCCAGGAGGTAGAGGCTGCAGTGAGCTG#((((.((((((((.((((((((.#)))))))).)).........)))))))))).	9715	9746	1	-24	0	4.79942e-05	0.382	2.56118	1.24257	-8.91345	20	31	10	3UTR		0	0
hsa-miR-221-3p	NM_017673	SWT1	AGCTACATTGTCTGCTGGGTTTC#AGACCCAGGGTACAGTATTAGCA#.((((.(((((.(.((((((((.#)))))))).).)))))..)))).	3186	3209	1	-20.8	0	0.00448974	0.529	0.14509	0.0981362	-9.89793	18	23	8	3UTR		0	0
hsa-miR-221-3p	NM_017679	BCAS3	AGCTACATTGTCTGCTGGGTTTC#GACCCTGAGTGGACAGTCACAGCC#.(((..(((((((((((((((..#)))))..))))))))))...))).	3208	3232	1	-19.9	0	0.000114758	0.441	0.372239	0.359633	-9.81332	18	24	10	3UTR		0	0
hsa-miR-221-3p	NM_017691	LRRC49	AGCTACATTGTCTGCTGGGTTTC#GAGACTCTCTAGGCTAGTGTGTGCTG#((((((((((((((..(((((((#)))))))..))))).)))))).))).	4750	4776	1	-21.2	1	0.000549779	0.588	-0.13845	-0.0272207	-4.90607	21	26	7	3UTR		0	0
hsa-miR-221-3p	NM_017694	MFSD6	AGCTACATTGTCTGCTGGGTTTC#GAAACCTGGGGGGAGTGTGGA#..(((((((.(((.(((((((((#))))))))).)))))))))).	3957	3978	1	-22.7	1	0.00261977	0.559	-0.142688	0.0220505	-7.05635	19	21	10	3UTR		0	0
hsa-miR-221-3p	NM_017737	FNBP1L	AGCTACATTGTCTGCTGGGTTTC#GCTGCAGCTGCCGATGTAGCC#.(((((((((.(.(((((((...#))).)))).).))))))))).	2790	2811	1	-20.4	1	1.44028e-05	0.456	1.32763	1.92381	-7.90723	17	21	9	3UTR		0	0
hsa-miR-221-3p	NM_017754	UHRF1BP1	AGCTACATTGTCTGCTGGGTTTC#GAAATAGTCCAGCAGAGGAGTGTGGG#..(((((((.(((((((((((((#)))))...))))))))..))))))).	4985	5011	1	-23.5	1	0.00928399	0.456	0.350512	0.191696	-6.19951	20	26	8	3UTR		0	0
hsa-miR-221-3p	NM_017759	INO80D	AGCTACATTGTCTGCTGGGTTTC#GAACCCAGGAGAAATAGTGGCA#.(((((....(((.((((((((.#)))))))).)))....))))).	6413	6435	1	-24.6	0	0.0159309	0.603	0.592508	0.569275	-10.8064	16	22	8	3UTR		0	0
hsa-miR-221-3p	NM_017762	MTMR10	AGCTACATTGTCTGCTGGGTTTC#GGGACATGTGGTGACAGCAGTGGTGTGGCTG#((((((((((.((((((......#.)))))))))))))))).	4516	4547	1	-22.7	1	9.59894e-06	0.382	0	0	-6.76235	16	18	16	3UTR		0	0
hsa-miR-221-3p	NM_017765	SLC66A1	AGCTACATTGTCTGCTGGGTTTC#GGGCCTCTCAGGAGACAGTGAGGCTG#((((.((((((((.(((((....#.))))).)))))))).)))).	1349	1375	1	-24.9	0	3.39901e-06	0.368	0	0	-8.91345	17	21	8	3UTR		0	0
hsa-miR-221-3p	NM_017790	RGS3	AGCTACATTGTCTGCTGGGTTTC#GAGATGGGAAGGAGCTCAGTGGGCTGGAGGAATGGCGAGCAGGCCAGTGTGGCTG#(((((((((((((((((((((((#.)))))))))))))).....................))))))))).	2694	2749	1	-27	1	2.50079e-07	0.382	0	0	-3.93757	23	46	14	3UTR		0	0
hsa-miR-221-3p	NM_017791	FLVCR2	AGCTACATTGTCTGCTGGGTTTC#GAAGCCCAGTTCTAATAAGTGGCA#.(((((.((((..((((((((((#))))))))))....))))))))).	2349	2373	1	-23.4	0	0.00136084	0.456	0.0991186	0.41438	-9.97295	19	24	10	3UTR		0	0
hsa-miR-221-3p	NM_017807	OSGEP	AGCTACATTGTCTGCTGGGTTTC#GAGCCCAGCCTGGGCAAATAGCA#.((((..(((((((((((((((.#)))))))))..)))))).)))).	1721	1744	1	-24.5	0	0.000163042	0.574	4.07975	3.61578	-7.23797	19	23	9	3UTR		0	0
hsa-miR-221-3p	NM_017837	PIGV	AGCTACATTGTCTGCTGGGTTTC#GGAGCCCAGCTAGGTGGGTGCACCTGGCA#.((((((((.(((((((((((((#)))))))))).)))..))))....)))).	4136	4165	1	-23.2	1	8.19703e-06	0.441	0.370524	0.341254	-5.03583	21	29	10	3UTR		0	0
hsa-miR-221-3p	NM_017842	SLC48A1	AGCTACATTGTCTGCTGGGTTTC#GACCCCAGAACTGTGGCAGAAAATACACAGCAGGACGAGTGTGGTC#.((((((((((((((((.((...#.)).)))))).)).)))))))).	599	645	1	-20.6	1	0.000762028	0.426	0.54553	0.0508148	-3.79332	18	23	8	3UTR		0	0
hsa-miR-221-3p	NM_017879	ZNF416	AGCTACATTGTCTGCTGGGTTTC#GAAACTCCAAACCTGAGAAAAGCCTTAGACCTGCAGGGAATGTGCC#.((.(((((.(((((.((((((.#.))))))))))).))))))).	1997	2043	1	-21.8	0	0.00229482	0.559	0	0	-8.3009	18	21	11	3UTR		0	0
hsa-miR-221-3p	NM_017883	WDR13	AGCTACATTGTCTGCTGGGTTTC#GGGACCCAGCAGGAGACCCCTCTGAGCGCAGTGATGGG#..(((((((((((((((((((((#))))))))))))...............)))))).))).	3126	3164	1	-25.5	1	0.00472005	0.353	0	0	-4.957	21	38	12	3UTR		0	0
hsa-miR-221-3p	NM_017902	HIF1AN	AGCTACATTGTCTGCTGGGTTTC#GAAACATTTCTGCTGTAGTTGTTTACCTCCATCCTAGCTGGCAGTGTGGG#..((((((((((.((((((....#.)))))).)))))))))).	3866	3916	1	-25	1	2.05068e-05	0.471	0	0	-6.24613	16	19	10	3UTR		0	0
hsa-miR-221-3p	NM_017911	FAM118A	AGCTACATTGTCTGCTGGGTTTC#GAGCTTCTCTGACTGTGACCCGGCAGAGGCTTCTGTGGCG#.((((((.(.(((((((((((..#.))))))))))).)....)))))).	2564	2604	1	-27.2	1	0.000191529	0.382	0	0	-7.34947	18	25	11	3UTR		0	0
hsa-miR-221-3p	NM_017933	PID1	AGCTACATTGTCTGCTGGGTTTC#GGGCCCAGTTTTCAGGCATGTAGA#..(((((.((((((((((((((.#))))))))....))))))))))).	2600	2624	1	-22.8	0	0.0184547	0.5	0	0	-7.27064	19	24	11	3UTR		0	0
hsa-miR-221-3p	NM_017938	TMEM255A	AGCTACATTGTCTGCTGGGTTTC#ACCTCTGTATTCAGCAGAAGTGTGGTTG#(((((((((.((((((((((...#.))))))))))))))))))).	1481	1509	1	-23.3	1	0.000128461	0.559	0	0	-5.18008	19	21	19	3UTR		0	0
hsa-miR-221-3p	NM_017943	FBXO34	AGCTACATTGTCTGCTGGGTTTC#AATGCAGCTAGGATAGTGTTGCGGCTA#(((((((((((((((((.(((..#))).))))..)))))))))...)))).	2976	3003	1	-20.3	1	0.000151887	0.691	2.78349	1.35591	-3.93757	20	27	9	3UTR		0	0
hsa-miR-221-3p	NM_017946	FKBP14	AGCTACATTGTCTGCTGGGTTTC#AAACCTAGATAGTGTAGCC#.((((((((((((...((((((.#)))))))))))))))))).	3511	3530	1	-21.7	1	0.0253471	0.603	-0.0319602	0.118034	-5.61866	18	19	18	3UTR		0	0
hsa-miR-221-3p	NM_017994	TMEM248	AGCTACATTGTCTGCTGGGTTTC#GAGGGCCAGCAGAAGGTCAGCA#.(((((....((((((((.((((#)))).))))))))..)).))).	3862	3884	1	-22.7	0	0.00355926	0.5	0.389152	1.5645	-9.94954	17	22	8	3UTR	MIRT046867	0	0
hsa-miR-221-3p	NM_018013	SOBP	AGCTACATTGTCTGCTGGGTTTC#AGGGCCAGGACGGTGTGGCG#.(((((((((((..((((.(((.#))).))))))))))))))).	4600	4620	1	-22.8	1	8.74017e-07	0.309	0.0976331	1.42214	-5.9393	18	20	15	3UTR		0	0
hsa-miR-221-3p	NM_018061	PRPF38B	AGCTACATTGTCTGCTGGGTTTC#GATGTCAGTGCTAGGGCTAAAACTCAGTATTCTGACAGTGTAGTG#.(((((((((((((((((((((.#.))))))))))....))))))))))).	3470	3515	1	-26.2	1	0.000203565	0.559	0.162507	-0.0624734	-3.79332	21	27	11	3UTR		0	0
hsa-miR-221-3p	NM_018073	TRIM68	AGCTACATTGTCTGCTGGGTTTC#GAGGCCCAGTCAAATGAGCA#.(((.((((....((((((((((#))))))))))..))))))).	1908	1928	1	-21.3	0	0.0124584	0.515	1.02552	1.60871	-16.6156	17	20	10	3UTR		0	0
hsa-miR-221-3p	NM_018103	LRRC8D	AGCTACATTGTCTGCTGGGTTTC#GGAATGCAGTAGAGGTATGTGGA#..(((((((.(((((((.(((((#))))).))))))).).)))))).	3561	3584	1	-22.6	1	0.00543858	0.676	0.262505	0.0613263	-6.19951	19	23	7	3UTR		0	0
hsa-miR-221-3p	NM_018143	KLHL11	AGCTACATTGTCTGCTGGGTTTC#AACTCAGAGGAGATGTAGCA#.((((((((.(((.(((((((..#)))))))))).)))))))).	7259	7279	1	-21.7	1	0.00014285	0.603	2.48362	1.06562	-5.89267	18	20	10	3UTR		0	0
hsa-miR-221-3p	NM_018157	RIC8B	AGCTACATTGTCTGCTGGGTTTC#GATCCCTAGCAGAAGATTTAGCC#.((((.(((.(((((((((..((#))..))))))))).))).)))).	1941	1964	1	-22.4	0	0.0185923	0.529	0.407834	0.155857	-6.93679	18	23	9	3UTR		0	0
hsa-miR-221-3p	NM_018163	DNAJC17	AGCTACATTGTCTGCTGGGTTTC#GGAGCAAGGCAGACGGTGAGGCA#.(((.(((((((((((..(((((#)))))..))))))))))).))).	1438	1461	1	-27.2	0	0.00366857	0.397	0.251419	-0.115483	-7.91236	19	23	11	3UTR		0	0
hsa-miR-221-3p	NM_018183	SBNO1	AGCTACATTGTCTGCTGGGTTTC#GGGACTCAGCAGAATTTGTGTGTTG#(((((((...(((((((((((((#)))))))))))))...)))).))).	5762	5787	1	-24.1	1	0.000317814	0.544	2.59465	3.08165	-8.55011	20	25	13	3UTR		0	0
hsa-miR-221-3p	NM_018228	VRTN	AGCTACATTGTCTGCTGGGTTTC#GAGACCACCCTGGGCAATGTAGTG#.(((((((((((((...((((((#))))))....))))))))))))).	2880	2904	1	-23.2	1	0.000177981	0.574	0.176619	0.0695015	-4.76182	19	24	13	3UTR		0	0
hsa-miR-221-3p	NM_018256	WDR12	AGCTACATTGTCTGCTGGGTTTC#GAACCCGGGAGGCAGGGGTTGTAGTG#.((((((((((((.((((((((.#)))))))).))))))....)))))).	2488	2514	1	-25.8	1	9.58825e-06	0.426	0.111467	-0.0075037	-4.65016	20	26	8	3UTR		0	0
hsa-miR-221-3p	NM_018292	QRSL1	AGCTACATTGTCTGCTGGGTTTC#GAAACTTGGTAGATAGCAGAGCA#.(((...((((((((((((((((#))))))))))))))))...))).	2800	2823	1	-22.1	0	0.0151098	0.632	0.0910592	0.129018	-11.357	19	23	16	3UTR		0	0
hsa-miR-221-3p	NM_018302	C4orf19	AGCTACATTGTCTGCTGGGTTTC#AAGCTCAGCAGTTTTCACAGTAGAGCA#.(((..((((((((((((((((.#))))))))))).....)))))..))).	1678	1705	1	-21.9	0	0.00737883	0.515	0	0	-9.81332	19	27	11	3UTR		0	0
hsa-miR-221-3p	NM_018342	TMEM144	AGCTACATTGTCTGCTGGGTTTC#GAAATTAAGCCAGGCAGGGTGGCG#.(((((.(((((((((.((((((#)))))).))).)))))).))))).	2262	2286	1	-21.6	0	0.000129389	0.515	0	0	-5.33701	20	24	6	3UTR		0	0
hsa-miR-221-3p	NM_018347	AP5S1	AGCTACATTGTCTGCTGGGTTTC#AAGCCTTCAGGCAATGTGGA#..((((((((((((..((((((.#)))))).)))))))))))).	2361	2381	1	-23.7	1	3.90369e-05	0.441	0.175174	0.152357	-5.9255	18	20	12	3UTR		0	0
hsa-miR-221-3p	NM_018353	MIS18BP1	AGCTACATTGTCTGCTGGGTTTC#ACCATAAAGCAGACAGTGTTTGTA#.((.((((((((((((.......#.))))))))))))..)).	3690	3714	1	-20	0	0.000629415	0.676	0.737473	0.717849	-6.82535	14	18	12	3UTR		0	0
hsa-miR-221-3p	NM_018364	RSBN1	AGCTACATTGTCTGCTGGGTTTC#GCCTGGCGGACTATTTGCGTTGTGTGGCC#.(((((((.(((((((((((...#)))))))))))..........))))))).	6368	6397	1	-23.6	1	0.00702176	0.603	3.45999	2.90615	-4.84971	18	29	11	3UTR		0	0
hsa-miR-221-3p	NM_018373	SYNJ2BP	AGCTACATTGTCTGCTGGGTTTC#GAGCCCAGGAGACTGAGGTGCA#.((.((...((((.((((((((.#)))))))).))))....)))).	4341	4363	1	-22.9	0	1.28939e-05	0.456	0	0	-12.5959	16	22	8	3UTR		0	0
hsa-miR-221-3p	NM_018396	METTL2B	AGCTACATTGTCTGCTGGGTTTC#AGACCAGGCTGGGTAATGTAGCA#.(((((((((((((((.(((((.#))))).))).)))))))))))).	3556	3579	1	-22.7	1	0.00016308	0.603	0.0129843	-0.0133843	-3.79332	20	23	12	3UTR		0	0
hsa-miR-221-3p	NM_018400	SCN3B	AGCTACATTGTCTGCTGGGTTTC#GAACCCGGCAGTATGCATGATTGCC#.((.....((((((((((((((.#)))))))))))...))).....)).	3999	4024	1	-20.9	0	0.000986002	0.618	0.145769	0.12341	-16.7027	16	25	11	3UTR		0	0
hsa-miR-221-3p	NM_018401	STK32B	AGCTACATTGTCTGCTGGGTTTC#ACCCAGCAGGTCAGTTTTCTGTGCA#.((.((((((((((((((((...#)))))))))).))).....))))).	2971	2996	1	-21.5	0	0.000467553	0.574	0	0	-6.82535	18	25	10	3UTR		0	0
hsa-miR-221-3p	NM_018413	CHST11	AGCTACATTGTCTGCTGGGTTTC#GAGCATCCAGCTCGACAATTAGCA#.((((.((((((.((((((((((#))).)))))))..)))))))))).	2365	2389	1	-22.8	0	0.036782	0.588	0.473319	0.32573	-6.98341	20	24	10	3UTR		0	0
hsa-miR-221-3p	NM_018439	IMPACT	AGCTACATTGTCTGCTGGGTTTC#GAACCTGGTGTAGGGCAGGAGTATGTTGTGTAGTTA#((((((((((((((((((((((.#)))))))))...)))))..........)))))))).	1938	1974	1	-20.1	1	0.00593984	0.574	-0.32326	0.00447549	-3.93757	22	36	9	3UTR		0	0
hsa-miR-221-3p	NM_018440	PAG1	AGCTACATTGTCTGCTGGGTTTC#GCCCACACCAACAGTGTGGCA#.((((((((((.((.(((((...#)))))))...)))))))))).	2985	3006	1	-22.1	1	2.71611e-05	0.5	-0.0750618	-0.295361	-7.87558	17	21	10	3UTR		0	0
hsa-miR-221-3p	NM_018457	PRR13	AGCTACATTGTCTGCTGGGTTTC#GGAATTTAGTGGCAAATACATTCCCCAGCAGGCCTTTTGTTGGTTG#(((((((..((((((((((....#.))))))))))....))).)))).	920	966	1	-22.9	1	0.000128073	0.515	0.162126	0.178378	-7.3076	17	24	10	3UTR		0	0
hsa-miR-221-3p	NM_018538	ERMAP	AGCTACATTGTCTGCTGGGTTTC#GAGGTCCAGCTAGAAAAAGTGGCA#.(((((.((.(((((((((((((#)))))))))).))).)).))))).	2463	2487	1	-21.3	0	0.00133162	0.603	0.622086	-0.0430781	-6.57952	20	24	10	3UTR		0	0
hsa-miR-221-3p	NM_018566	YOD1	AGCTACATTGTCTGCTGGGTTTC#ACCCAGCAGCTTTAACTTGTAGA#..(((((..(((((((((((...#))))))))).....)).))))).	1527	1550	1	-20.6	0	0.00341666	0.632	0.354522	0.560501	-8.32703	16	23	9	3UTR	MIRT046938	1	0
hsa-miR-221-3p	NM_018569	AP1AR	AGCTACATTGTCTGCTGGGTTTC#AGCTAATGCAGACAATTTGAAAAGAGAGCAGAGAAATGGGGTAGCTG#(((((((((((((((..((((..#))))...)))))))))........................)))))).	4927	4974	1	-19.5	1	0.032908	0.559	0.0811386	0.154729	-4.17062	19	47	9	3UTR		0	0
hsa-miR-221-3p	NM_018655	LENEP	AGCTACATTGTCTGCTGGGTTTC#GGACCCCAGTAAGATTGTGGCA#.((((((..((((((((((.(((#))).))))))).))))))))).	467	489	1	-22.4	1	0.000709012	0.441	0.373362	0.226441	-7.16335	19	22	9	3UTR		0	0
hsa-miR-221-3p	NM_018660	ZNF395	AGCTACATTGTCTGCTGGGTTTC#AGACCTGGCAGTAGGGTCATGATGTTGGGAAGGGTGTAGTG#.((((((((.((((((((((((.#)))))))))))...................).)))))))).	3310	3351	1	-21.1	1	0.0139866	0.456	2.48522	2.61506	-5.03583	20	41	11	3UTR		0	0
hsa-miR-221-3p	NM_018662	DISC1	AGCTACATTGTCTGCTGGGTTTC#ACTCAGTAACAGTGTAGTA#.((((((((((.((((((((...#)))))))))))))))))).	3559	3578	1	-23.1	1	0.00176161	0.588	-0.26412	-0.908378	-7.14013	18	19	18	3UTR		0	0
hsa-miR-221-3p	NM_018708	FEM1A	AGCTACATTGTCTGCTGGGTTTC#AGCCCAGGCAGACGGGAGCA#.(((.(.((((((((((((((..#))))))).))))))))))).	3469	3489	1	-23.6	0	3.57616e-05	0.412	-0.641294	-0.878204	-9.45605	18	20	11	3UTR		0	0
hsa-miR-221-3p	NM_018711	SVOP	AGCTACATTGTCTGCTGGGTTTC#GAACCCAGGAGGCAGAGCTT#((((...((((((.((((((((.#)))))))).)))))))))).	4323	4343	1	-23.9	0	0.00222733	0.368	0.116025	0.0500697	-12.3581	18	20	10	3UTR		0	0
hsa-miR-221-3p	NM_018724	IL20	AGCTACATTGTCTGCTGGGTTTC#CCCAGTAGACTCCCCAGTC#.(((.....((((((((((....#)))))))))).....))).	1186	1205	1	-19.7	0	0.00372198	0.529	-0.414306	-0.0108821	-14.727	13	19	10	3UTR		0	0
hsa-miR-221-3p	NM_018834	MATR3	AGCTACATTGTCTGCTGGGTTTC#TCTAGTAGTCAATGTAT#...(((((((.((((((((....#)))))))).))))))).	3415	3432	1	-18.9	0	0.00093752	0.662	2.86125	2.57102	-9.33931	15	17	8	3UTR		0	0
hsa-miR-221-3p	NM_018890	RAC1	AGCTACATTGTCTGCTGGGTTTC#GCCCACGCGGACACACGCCTCCTGTAGTC#.((((((.((((((((((((...#))))).))))))).........)))))).	2101	2130	1	-22.1	1	0.00884338	0.456	0.767378	1.21177	-6.10696	18	29	7	3UTR		0	0
hsa-miR-221-3p	NM_018945	PDE7B	AGCTACATTGTCTGCTGGGTTTC#CCTGGCAGGTCATTGTAGTTA#(((((((.(((((((((((....#))))))))).)).))))))).	3221	3242	1	-23.4	1	0.00102481	0.603	0.63437	0.567159	-6.25121	18	21	9	3UTR		0	0
hsa-miR-221-3p	NM_018947	CYCS	AGCTACATTGTCTGCTGGGTTTC#GGACTTGGTGACTGTATAAAGTTAGTGGTATTCAGGGACAGTGTAGCA#.((((((((((((.((((((...#.)))))))))))))))))).	1938	1986	1	-24.6	1	0.011353	0.574	-0.0281531	-0.0356734	-4.65016	18	20	18	3UTR		0	0
hsa-miR-221-3p	NM_018984	SSH1	AGCTACATTGTCTGCTGGGTTTC#AAACCACTTCAGCAAATACAGTGTGGCA#.((((((((((.((((((((((.#)))))....)))))...)))))))))).	12031	12059	1	-23.8	1	0.00111878	0.588	5.03022	5.10303	-7.14013	20	28	10	3UTR		0	0
hsa-miR-221-3p	NM_019004	ANKIB1	AGCTACATTGTCTGCTGGGTTTC#GCTCCAGGGCAGTGTCAGCG#.(((((((((((..((((((...#)).)))))))))))).))).	4570	4590	1	-19	1	0.00334585	0.441	1.25544	1.15675	-5.9393	17	20	12	3UTR		1	1
hsa-miR-221-3p	NM_019007	ARMCX6	AGCTACATTGTCTGCTGGGTTTC#GAGCTTTGAGTAACTTCTTGGTTGTGCAGTCTGCAGGCAATGTTGGCA#.((((((((((((((.((.(...#.).)).))))))))))).))).	1428	1476	1	-22	1	4.62971e-05	0.515	2.36102	1.6543	-4.02637	17	22	11	3UTR		0	0
hsa-miR-221-3p	NM_019054	SHLD2	AGCTACATTGTCTGCTGGGTTTC#CCAGCAAACATGTAGCA#.((((((.(((.((((((.....#)))))).))))))))).	3224	3241	1	-22.5	1	0.018039	0.603	-0.211008	-0.140662	-9.45376	15	17	9	3UTR	MIRT057259	0	1
hsa-miR-221-3p	NM_019073	SPATA6	AGCTACATTGTCTGCTGGGTTTC#ATCTAGTAGACAGCCTGGCA#.((((..(((((((((((((...#)))))))))))))..)))).	3429	3449	1	-21.6	0	0.00488408	0.647	3.02135	2.91686	-7.23797	17	20	13	3UTR		0	0
hsa-miR-221-3p	NM_019090	MAP10	AGCTACATTGTCTGCTGGGTTTC#ATCTAGCACAATTCCTGGCATGTGGCTG#(((((((.((((((((((((...#))))))))........))))))))))).	3405	3433	1	-20.4	1	0.00348661	0.647	-0.0554015	0.0714496	-6.25121	19	28	11	3UTR		0	0
hsa-miR-221-3p	NM_019099	INKA2	AGCTACATTGTCTGCTGGGTTTC#GAAGCTCAGCAGATACTGG#.....((.(((((((((((((((#))))))))))))))).)).	5117	5136	1	-24.3	0	0.000989129	0.485	4.41822	2.77194	-15.9792	17	19	15	3UTR		0	0
hsa-miR-221-3p	NM_019114	EPB41L4B	AGCTACATTGTCTGCTGGGTTTC#GAACCCAAAGTAGGAAATGATAGCTT#(((((((((.((((((((((((.#)))))))..))))).)))).))))).	3947	3973	1	-21.5	1	0.00178317	0.706	0	0	-5.18008	21	26	7	3UTR		0	0
hsa-miR-221-3p	NM_019555	ARHGEF3	AGCTACATTGTCTGCTGGGTTTC#CCCAGCTCTTAGATGTGGTAGCTA#((((((..(((((((((((....#))))))....)))))..)))))).	2099	2123	1	-22.2	0	0.00409788	0.544	5.74086	2.92933	-7.7949	17	24	6	3UTR		0	0
hsa-miR-221-3p	NM_019600	FAM214A	AGCTACATTGTCTGCTGGGTTTC#TTAGCAGTGCAATGTGGACTA#((((((((((((((((((.....#))))))).))))))))).)).	4112	4133	1	-21	1	1.20557e-05	0.603	0.865474	0.846155	-3.93757	18	21	9	3UTR		1	1
hsa-miR-221-3p	NM_019845	RPRM	AGCTACATTGTCTGCTGGGTTTC#GAACTCAGCAGAAAGTGGCA#.(((((....((((((((((((.#))))))))))))..))))).	735	755	1	-24.8	0	0.00686922	0.456	0	0	-9.94954	17	20	12	3UTR		0	0
hsa-miR-221-3p	NM_019857	CTPS2	AGCTACATTGTCTGCTGGGTTTC#TCCAGAGGCAGCCTTTGGTACTTAAAATATCTGTAGCTG#(((((((((((((.(((((....#)))))))))))....................))))))).	2194	2233	1	-19.1	1	0.164623	0.588	3.03073	3.08916	-4.79441	18	39	11	3UTR		0	0
hsa-miR-221-3p	NM_019903	ADD3	AGCTACATTGTCTGCTGGGTTTC#TCAGATTGGGGGATGTAGCA#.((((((((.(((.((((.....#))))...))).)))))))).	2349	2369	1	-18.2	1	0.0180977	0.618	2.03475	2.07923	-5.89267	15	20	8	3UTR		0	0
hsa-miR-221-3p	NM_020120	UGGT1	AGCTACATTGTCTGCTGGGTTTC#GATACCCAGCAGTGCAGAGGCTAGCTG#((((((.(((((((((((((.((#)).))))))))).))))..).))))).	10281	10308	1	-25.9	0	6.56932e-05	0.471	0	0	-5.48126	21	27	9	3UTR		0	0
hsa-miR-221-3p	NM_020122	KCMF1	AGCTACATTGTCTGCTGGGTTTC#CTTGGCAGACAGTGCATGTAGCC#.((((((((((((((((((....#)))))))))))....))))))).	6546	6569	1	-23.8	1	7.30914e-05	0.515	0	0	-3.79332	18	23	11	3UTR		0	0
hsa-miR-221-3p	NM_020133	AGPAT4	AGCTACATTGTCTGCTGGGTTTC#GAGCCGAAAGAGAATGTGGCG#.((((((((.(((..(.(((((.#))))).).))).)))))))).	3717	3738	1	-21.4	1	0.0135537	0.515	0	0	-6.62812	17	21	8	3UTR		0	0
hsa-miR-221-3p	NM_020139	BDH2	AGCTACATTGTCTGCTGGGTTTC#CCAGCAGATATAGTTTCTG#((..((..((((((((((.....#))))))))))..))..)).	1186	1205	1	-19	0	0.000313509	0.515	-0.123581	-0.0024852	-12.3845	14	19	10	3UTR		0	0
hsa-miR-221-3p	NM_020141	TMEM167B	AGCTACATTGTCTGCTGGGTTTC#AAACCCTGTAGGCCAGGGTGGA#..((((...((((((.((((((.#)))))).))))))....)))).	2656	2678	1	-20	0	8.70084e-05	0.559	0	0	-10.1038	16	22	6	3UTR		0	0
hsa-miR-221-3p	NM_020162	DHX33	AGCTACATTGTCTGCTGGGTTTC#AGCCTGGCCGACAGTGTGA#...(((((((((.((((((((..#)))))))).))))))))).	4509	4528	1	-23.2	0	4.53973e-05	0.515	0	0	-7.80367	17	19	9	3UTR		0	0
hsa-miR-221-3p	NM_020188	CMC2	AGCTACATTGTCTGCTGGGTTTC#GAACCCGGGAGGCGGAGCTT#((((...((((((.((((((((.#)))))))).)))))))))).	9081	9101	1	-22.4	0	3.45288e-05	0.353	0	0	-12.3581	18	20	10	3UTR		0	0
hsa-miR-221-3p	NM_020202	NIT2	AGCTACATTGTCTGCTGGGTTTC#GGGACTGAGCCAGGCGCAGTAGCA#.(((((..((((((((.((((((#)))))).))).)))))..))))).	1675	1699	1	-23.7	0	2.3452e-05	0.456	-0.0949778	-0.108381	-7.65065	19	24	6	3UTR		0	0
hsa-miR-221-3p	NM_020205	OTUD7B	AGCTACATTGTCTGCTGGGTTTC#GAGACCCTGAGACAATGG#.....((((((((.(.(((((((#))))))).))))))))).	5777	5795	1	-21.7	0	0.00441339	0.618	0	0	-14.7555	16	18	9	3UTR		0	0
hsa-miR-221-3p	NM_020228	PRDM10	AGCTACATTGTCTGCTGGGTTTC#AGCCAGTGTGGATATTGTGGCC#.((((((.((((((((((.(...#).)))))..))))).)))))).	5888	5910	1	-20.6	1	0.000654523	0.574	4.2953	5.25436	-6.10696	17	22	6	3UTR		0	0
hsa-miR-221-3p	NM_020238	INCENP	AGCTACATTGTCTGCTGGGTTTC#GGGCCCAGCCCCACATGGCCTGCAGACAGTGCTCTGTAAATAGTTGTTTTAATTTAGCTG#(((((((((((((((.(((((..#.))))))))))))))).......................))))).	3131	3191	1	-23.1	1	0.00272526	0.676	0.537251	0.181201	-4.17062	20	45	15	3UTR		0	0
hsa-miR-221-3p	NM_020240	CDC42SE2	AGCTACATTGTCTGCTGGGTTTC#GAGACCCACAAGCACAATGA#.....((((((((..((((((((#))))))))..)).)))))).	1194	1214	1	-19.2	0	0.0407638	0.691	1.80404	0.643409	-15.2579	16	20	8	3UTR		0	0
hsa-miR-221-3p	NM_020245	TULP4	AGCTACATTGTCTGCTGGGTTTC#AAGCCCGGCAGGCCCAGGAGAGGGCGCTGACCTGTGGTC#.((((((..(((((((((((((.#)))))))))))))...................)))))).	6306	6345	1	-24.3	1	1.18139e-05	0.456	0.415003	0.245732	-7.16335	19	39	13	3UTR		0	0
hsa-miR-221-3p	NM_020248	CTNNBIP1	AGCTACATTGTCTGCTGGGTTTC#GCCCAGCAGAGGCGTACTA#((.(((..(.((((((((((...#)))))))))).).))))).	1552	1571	1	-20.7	0	0.000996379	0.309	0.0307717	-0.203642	-10.5949	16	19	10	3UTR		0	0
hsa-miR-221-3p	NM_020327	ACVR1B	AGCTACATTGTCTGCTGGGTTTC#GAAGCCTAGAAGCACGGCTGTGGGTG#(.(((((((((((.(((((((((#))))))))).)).)))).))))).).	2900	2926	1	-21	1	6.22409e-06	0.588	0.828221	1.41688	-5.95809	21	26	9	3UTR		0	0
hsa-miR-221-3p	NM_020385	REXO4	AGCTACATTGTCTGCTGGGTTTC#GAAACCTTTTCAGAATCATGGCAGAGGGGCGTGGCG#.(((((.((.(((((((((((((#)))))))............)))))).))..))))).	1528	1564	1	-23.1	0	3.70425e-06	0.441	3.67711	2.11683	-6.57952	20	36	7	3UTR		0	0
hsa-miR-221-3p	NM_020447	FAM219B	AGCTACATTGTCTGCTGGGTTTC#GGGACCTGGTGGGACAGTGCAGTG#.(((.((((((((((((((((((#)))))))))))).)))))).))).	2996	3020	1	-23.3	0	0.00382482	0.485	3.11044	2.20549	-7.91236	21	24	12	3UTR		0	0
hsa-miR-221-3p	NM_020469	ABO	AGCTACATTGTCTGCTGGGTTTC#CCCAACAGGCTGTGTGTGGCA#.(((((((.(((((.((((....#)))).)))))...))))))).	2817	2838	1	-22.9	1	8.09312e-06	0.412	0.0266734	-0.0936808	-5.58516	16	21	7	3UTR		0	0
hsa-miR-221-3p	NM_020549	CHAT	AGCTACATTGTCTGCTGGGTTTC#CCAGCAGCAGTAGCTA#((((((..((.(((((((.....#))))))))))))))).	4515	4531	1	-22	0	0.000146878	0.485	0.13302	0.150349	-10.6197	15	16	15	3UTR		0	0
hsa-miR-221-3p	NM_020640	DCUN1D1	AGCTACATTGTCTGCTGGGTTTC#GCTGTGCAGAAATCATAATGTAGCTT#(((((((((((((((..(((...#)))..))))).....)))))))))).	5156	5182	1	-19.7	1	0.0627426	0.618	0.55915	1.89683	-4.17062	18	26	10	3UTR		1	1
hsa-miR-221-3p	NM_020714	ZNF490	AGCTACATTGTCTGCTGGGTTTC#GGAATGGGGAAGAAGGACTTGGGCCCCAGCAGGCCTTTTGTGGCA#.((((((..((((((((((.(((#.))).))))))))))....)))))).	3362	3407	1	-28.1	1	3.06281e-05	0.456	-0.745255	-0.0217788	-7.16335	19	26	10	3UTR		0	0
hsa-miR-221-3p	NM_020715	PLEKHH1	AGCTACATTGTCTGCTGGGTTTC#AAACCCAGTACCACGCAATGTGCA#.((.(((((((.((((((((((.#))))))))))....))))))))).	5156	5180	1	-22.7	0	0.00484022	0.471	0.153567	-0.0823584	-10.1722	19	24	10	3UTR		0	0
hsa-miR-221-3p	NM_020717	SHROOM4	AGCTACATTGTCTGCTGGGTTTC#AGACCCAGCAACATAAGGACAAACAGTAGTC#.(((((.(((((((((((((((.#)))))))))).......)))))...))))).	12235	12266	1	-23.7	0	0.000685067	0.559	0	0	-5.33701	20	31	10	3UTR		0	0
hsa-miR-221-3p	NM_020726	NLN	AGCTACATTGTCTGCTGGGTTTC#GAAACTTCTGCAGGCAGCAGTGGCA#.(((((.((((((((.(((((((#)))))))..))))))))..))))).	5569	5594	1	-24.2	0	6.79069e-05	0.529	0.0466456	-0.0163207	-5.57006	20	25	8	3UTR		0	0
hsa-miR-221-3p	NM_020741	CFAP92	AGCTACATTGTCTGCTGGGTTTC#AGGCCCAGAGAGGGTAGCTA#((((((....(((.((((((((.#)))))))))))..)))))).	1463	1483	1	-22.2	0	4.40566e-05	0.5	-0.228307	-0.568209	-10.9506	17	20	11	3UTR		0	0
hsa-miR-221-3p	NM_020749	MTUS1	AGCTACATTGTCTGCTGGGTTTC#CCCATGAGTGGAAAATGTGGCTT#(((((((((.(((((((((....#))))...))))).))))))))).	2955	2978	1	-20.8	1	0.00265319	0.515	3.85289	2.94108	-5.18008	18	23	9	3UTR		0	0
hsa-miR-221-3p	NM_020755	SERINC1	AGCTACATTGTCTGCTGGGTTTC#GAAACCCTGTTTCTATAAAAAATAATCTGGGCTTTGTAGCA#.((((((..((((((.(((((((#))))))).))..................))))..)))))).	2292	2333	1	-23.1	1	0.00196273	0.559	5.51257	5.13502	-7.3964	19	41	7	3UTR		0	0
hsa-miR-221-3p	NM_020786	PDP2	AGCTACATTGTCTGCTGGGTTTC#GAACCCGGGAGGCGGAGGTTGCG#.((.((.((((((.((((((((.#)))))))).))))))..)).)).	3766	3789	1	-23.3	0	3.91636e-06	0.412	0.0395044	0.0484965	-9.22587	18	23	8	3UTR		0	0
hsa-miR-221-3p	NM_020839	WDR48	AGCTACATTGTCTGCTGGGTTTC#AAGCCCACACACTCTGTAGCTT#(((((((..((.((.(((((((.#))))))))).))..))))))).	2426	2448	1	-20.8	1	0.0174153	0.603	0.888378	1.22429	-11.3899	18	22	9	3UTR		0	0
hsa-miR-221-3p	NM_020840	FNIP2	AGCTACATTGTCTGCTGGGTTTC#AAACCCAAGAATCAATGTAGCC#.(((((((((..(..(((((((.#)))))))..)..))))))))).	4227	4249	1	-22.3	1	0.0798862	0.618	-0.0540801	0.0412551	-11.5572	17	22	9	3UTR		1	1
hsa-miR-221-3p	NM_020868	DPP10	AGCTACATTGTCTGCTGGGTTTC#GAGCAGCACGCTCAGAGACAGTGAACTAGCA#.((((((((((((.((((((...#.))))))))))))))...)))).	2645	2676	1	-22.4	1	0.000424052	0.529	0	0	-4.65016	18	23	14	3UTR		0	0
hsa-miR-221-3p	NM_020871	LRCH2	AGCTACATTGTCTGCTGGGTTTC#GAAAATACAGCAGAACCTCACTGTAGCA#.((((((.(((((((((..((((#))))...)))))))....)).)))))).	4320	4348	1	-20.9	1	0.000407259	0.676	0	0	-6.10696	19	28	7	3UTR		0	0
hsa-miR-221-3p	NM_020917	ZFP14	AGCTACATTGTCTGCTGGGTTTC#GAACCCAGGAGGCAGAGGTTGCG#.((.((.((((((.((((((((.#)))))))).))))))..)).)).	6110	6133	1	-24.8	0	0.000178379	0.426	2.07241	0.476663	-9.22587	18	23	8	3UTR		0	0
hsa-miR-221-3p	NM_020920	CHD8	AGCTACATTGTCTGCTGGGTTTC#CCTAGTCACCTCCATTAACCACAGACTATGTAGCG#.(((((((.(((((...((((..#.)))).))))).))))))).	7300	7335	1	-21.2	1	0.0232261	0.426	3.67633	3.08018	-5.81821	16	20	7	3UTR		1	0
hsa-miR-221-3p	NM_020960	GPR107	AGCTACATTGTCTGCTGGGTTTC#GAAAGCAAAGTCAAAACCCAGTTTAGGATGTAGCA#.((((((((.(..(((((((((.#.)))))))))..).)))))))).	2197	2232	1	-26.6	1	0.0103025	0.5	0.265504	-0.415446	-9.67177	18	23	9	3UTR	MIRT024176	0	0
hsa-miR-221-3p	NM_020961	METTL14	AGCTACATTGTCTGCTGGGTTTC#AACCTGGGAAGTGAGAATCAAGCAGGAGTGTGGCA#.((((((((.((((((.(((((.#.))))).)))))))))))))).	4287	4322	1	-23	1	0.00070917	0.5	-0.53575	-0.271044	-5.03583	19	22	14	3UTR		0	0
hsa-miR-221-3p	NM_020971	SPTBN4	AGCTACATTGTCTGCTGGGTTTC#GGGGCCCGGGGGTGTGGGGCGGTGTGGCG#.((((((((((((.(((((((((#))))))))).))......)))))))))).	8834	8863	1	-27.6	1	4.52324e-06	0.368	1.4101	1.49174	-4.65016	21	29	10	3UTR		0	0
hsa-miR-221-3p	NM_020974	SCUBE2	AGCTACATTGTCTGCTGGGTTTC#CCCAGCATCGTGGATGTAGACTG#(((((((((...(((((((....#))))))).....))))))).)).	3164	3187	1	-20.9	1	0.00284526	0.544	4.25761	4.25893	-11.3517	16	23	7	3UTR		0	0
hsa-miR-221-3p	NM_021044	DHH	AGCTACATTGTCTGCTGGGTTTC#GGAATCCAGGCAGGCAGGTGCC#.((.((.((((((((((((((((#))))))))).))))))))))).	2702	2724	1	-23.7	0	4.95121e-06	0.426	-0.357598	0.106386	-8.36903	20	22	11	3UTR		0	0
hsa-miR-221-3p	NM_021061	ZNF250	AGCTACATTGTCTGCTGGGTTTC#ACTCAGCAGACCTCATAGCTG#(((((....(((((((((((...#)))))))))))....))))).	2912	2933	1	-23.8	0	0.00120604	0.515	0.109954	0.0332855	-10.7522	16	21	11	3UTR		0	0
hsa-miR-221-3p	NM_021075	NDUFV3	AGCTACATTGTCTGCTGGGTTTC#GAACCCGGGAGGCAGAGCTT#((((...((((((.((((((((.#)))))))).)))))))))).	5408	5428	1	-23.2	0	0.00121588	0.441	-0.176275	-0.0412847	-12.3581	18	20	10	3UTR		0	0
hsa-miR-221-3p	NM_021078	KAT2A	AGCTACATTGTCTGCTGGGTTTC#GGGGCCCAGCCCCTCTAGAGTAGCTG#((((((.(((...((((((((((#)))))))))).....))).)))))).	2795	2821	1	-23.2	0	0.000537357	0.338	3.15229	2.30709	-12.942	19	26	10	3UTR		0	0
hsa-miR-221-3p	NM_021082	SLC15A2	AGCTACATTGTCTGCTGGGTTTC#GAACCCGGGAGGCAGAGGTTGCA#.((.((.((((((.((((((((.#)))))))).))))))..)).)).	4443	4466	1	-24.2	0	0.000323115	0.471	0.193559	-0.118945	-9.22587	18	23	8	3UTR		0	0
hsa-miR-221-3p	NM_021101	CLDN1	AGCTACATTGTCTGCTGGGTTTC#GGGATCCAGTGAGATAGAATACATGTAAGTGTGGTTT#(((((((((((((((((((((((#)))))))))).)))))............)))))))).	2631	2668	1	-21.6	1	0.000147342	0.647	2.97866	2.82203	-3.93757	23	37	10	3UTR		0	0
hsa-miR-221-3p	NM_021115	SEZ6L	AGCTACATTGTCTGCTGGGTTTC#GAGACATTCATCCAGAGACCATGTGGCA#.(((((((.((((.((((((...#.)))))))))).))))))).	3333	3361	1	-23.9	1	0.00188664	0.529	4.02686	1.0654	-5.70655	17	20	10	3UTR		0	0
hsa-miR-221-3p	NM_021182	HMHB1	AGCTACATTGTCTGCTGGGTTTC#GAAGCCCAGAGTTTTGGTGTGGA#..((((((((.((.(((((((((#)))))))))))...)))))))).	255	278	1	-21.1	1	0.00319988	0.515	-0.0525751	-0.160981	-8.63862	19	23	11	3UTR		0	0
hsa-miR-221-3p	NM_021203	SRPRB	AGCTACATTGTCTGCTGGGTTTC#GAGCCAAGCAGACAGTGGGTCTATTCTTCATTAGCTC#((((((((((((((((.(((((.#))))).)))))))))))..............))))).	1644	1681	1	-25.2	1	0.00572953	0.515	-0.00665128	-0.183113	-3.93757	21	37	11	3UTR		0	0
hsa-miR-221-3p	NM_021248	CDH22	AGCTACATTGTCTGCTGGGTTTC#GGAGCCCAGAGGTGCGGGATTCTGACCAACGGCATTAAAACTGAGGCGAGACCGGGCACGGTGTGGCTC#(((((((((((..(((.((((((#.)))))).)))))))))))))).	3315	3384	1	-27.6	1	3.23297e-06	0.382	-0.351784	0.195323	-8.57351	20	23	14	3UTR		0	0
hsa-miR-221-3p	NM_021615	CHST6	AGCTACATTGTCTGCTGGGTTTC#GAACCCAGGAGGCAGAGATTGCAGTGAGCTG#((((.((((((((.((((((((.#)))))))).))))).........))))))).	5527	5558	1	-24.4	0	0.000955964	0.426	0.345991	-0.0306055	-8.91345	20	31	8	3UTR		0	0
hsa-miR-221-3p	NM_021627	SENP2	AGCTACATTGTCTGCTGGGTTTC#AACTCATTTGTAAATTGGCGATGTAGCTG#(((((((((((((((((((((..#))))))...)))....)))))))))))).	5442	5471	1	-21.2	1	0.000373795	0.662	0.214996	0.200775	-3.93757	21	29	12	3UTR		0	0
hsa-miR-221-3p	NM_021634	RXFP1	AGCTACATTGTCTGCTGGGTTTC#CCTGGAAGTAGACAGTGCAGA#..((.((((((((((((((....#)))...))))))))))).)).	2678	2699	1	-18.4	0	0.0451325	0.618	0.287851	0.250716	-9.07604	16	21	11	3UTR		0	0
hsa-miR-221-3p	NM_021649	TICAM2	AGCTACATTGTCTGCTGGGTTTC#GATTCACAGCCCATTTGATAGTGTGGTA#.(((((((((((...((((((..#.))))))...))))))))))).	1765	1793	1	-22.9	1	0.0159757	0.5	-0.0464175	-0.0884149	-6.67474	17	22	11	3UTR		0	0
hsa-miR-221-3p	NM_021783	EDA2R	AGCTACATTGTCTGCTGGGTTTC#CTCAGCAGGGAGAAGGGCTG#((((...((.(((((((((....#))))))))).))...)))).	1622	1642	1	-19.9	0	2.19751e-05	0.5	0.00739246	0.162804	-12.7438	15	20	9	3UTR		0	0
hsa-miR-221-3p	NM_021813	BACH2	AGCTACATTGTCTGCTGGGTTTC#GAACTCAGCAGGCATTGGCTC#(((((...((((((((((((((.#)))))))))))))).))))).	4561	4582	1	-25.9	0	0.00487885	0.588	0	0	-9.69585	19	21	14	3UTR		0	0
hsa-miR-221-3p	NM_021928	SPCS3	AGCTACATTGTCTGCTGGGTTTC#GCCCAACTAGTACAATGTGGA#..((((((((((((.(((((...#)))))..))).))))))))).	2837	2858	1	-19.7	1	0.0214635	0.632	0	0	-5.69245	17	21	9	3UTR		0	0
hsa-miR-221-3p	NM_021931	DHX35	AGCTACATTGTCTGCTGGGTTTC#TCCAGCAGGCATGCAGTC#.(((.((.(((((((((((....#))))))))))))).))).	2419	2437	1	-21.7	0	2.52158e-05	0.426	0	0	-10.226	16	18	13	3UTR		0	0
hsa-miR-221-3p	NM_022048	CSNK1G1	AGCTACATTGTCTGCTGGGTTTC#CCCAGCAGGTCCATAGCA#.((((.....(((((((((....#)))))))))....)))).	3119	3137	1	-20.3	0	0.000107421	0.485	0	0	-11.8505	13	18	9	3UTR		0	0
hsa-miR-221-3p	NM_022067	VIPAS39	AGCTACATTGTCTGCTGGGTTTC#GAAGCTCAGATGCAGCAGTGCTGGA#..((((((((.((((((((((((#))))))))...))))))))).))).	2555	2580	1	-20.5	1	6.75849e-05	0.574	0.145039	-0.0764852	-7.78178	20	25	9	3UTR		0	0
hsa-miR-221-3p	NM_022072	NSUN3	AGCTACATTGTCTGCTGGGTTTC#ATCCAGCAGGCTATAAAGCA#.(((.....(((((((((((...#))))))))))).....))).	1814	1834	1	-21.9	0	0.000365892	0.647	0	0	-14.727	14	20	11	3UTR		0	0
hsa-miR-221-3p	NM_022098	XPNPEP3	AGCTACATTGTCTGCTGGGTTTC#GAAACCCAGGGTACAGAGTGAAAAGCAGACAGGCAGTGA#.....((((((((((((((((((#)))))))))....................))))))))).	3930	3969	1	-22.9	0	0.0276497	0.544	0.147378	-0.0668	-13.6656	18	39	9	3UTR		0	0
hsa-miR-221-3p	NM_022103	ZNF667	AGCTACATTGTCTGCTGGGTTTC#GAACCCAGGAGGCGGAGGTTGCA#.((.((.((((((.((((((((.#)))))))).))))))..)).)).	3374	3397	1	-24.1	0	7.72812e-05	0.426	0.468684	0.10601	-9.22587	18	23	8	3UTR		0	0
hsa-miR-221-3p	NM_022106	FAM217B	AGCTACATTGTCTGCTGGGTTTC#GAACCCGGGAGGCGGAGGTTGTGGTG#.((((((((((((.((((((((.#)))))))).))))))....)))))).	3828	3854	1	-24.7	1	0.00684353	0.412	5.725e-05	-0.133316	-4.65016	20	26	8	3UTR		0	0
hsa-miR-221-3p	NM_022121	PERP	AGCTACATTGTCTGCTGGGTTTC#GGACTAAGAGATTTCTGGCAGGTTCAGACACCCGGGGGACATGTGTGCAGTGTAGCTG#(((((((((((((.((((((.((#.)).)))))).)))))........)))))))).	2193	2251	1	-28.2	1	0.00153067	0.397	-0.0830478	0.271166	-4.79441	21	33	8	3UTR		0	0
hsa-miR-221-3p	NM_022171	TCTA	AGCTACATTGTCTGCTGGGTTTC#AGGCTCAACTGAGGATGTGGCTT#(((((((((.((.(.(((((((.#))))))).).)).))))))))).	1889	1912	1	-21.2	1	0.000129668	0.526	0	0	-7.20466	19	23	9	3UTR		0	0
hsa-miR-221-3p	NM_022334	ITGB1BP1	AGCTACATTGTCTGCTGGGTTTC#TCCGGCAGAGGTGTGGACTG#((((((((..(((((((((....#))))))))).)))))).)).	1527	1547	1	-22.4	1	0.000441261	0.426	0.676395	1.00454	-6.23647	17	20	9	3UTR		0	0
hsa-miR-221-3p	NM_022341	PDF	AGCTACATTGTCTGCTGGGTTTC#GAACCCAGGAGGCGGAGGTTACAGTGAGCTG#((((.((((((((.((((((((.#)))))))).))))).........))))))).	1724	1755	1	-23.7	0	0.000103891	0.456	0.136071	0.0760259	-8.91345	20	31	8	3UTR		0	0
hsa-miR-221-3p	NM_022347	TOR1AIP2	AGCTACATTGTCTGCTGGGTTTC#GGCCCATCCTCAGTGTGGCTG#((((((((((.....((((((..#))))))....)))))))))).	1879	1900	1	-21.3	1	0.000767457	0.515	0.026301	0.0725158	-12.9906	16	21	10	3UTR		0	0
hsa-miR-221-3p	NM_022350	ERAP2	AGCTACATTGTCTGCTGGGTTTC#ACTCGGCAGGCTGCAGCA#.(((.((..(((((((((((...#))))))))))))).))).	3222	3240	1	-21	0	5.73192e-05	0.397	-0.0626773	-0.201026	-11.2824	16	18	13	3UTR		0	0
hsa-miR-221-3p	NM_022372	MLST8	AGCTACATTGTCTGCTGGGTTTC#GGGACCCATGCAGCACCCAGGTCAGAGCA#.(((((...((((((((((((((#)))))))).)))).))....))...))).	1140	1169	1	-19.9	0	0.000491391	0.279	-0.485516	-0.0205354	-8.70704	19	29	8	3UTR		0	0
hsa-miR-221-3p	NM_022444	SLC13A1	AGCTACATTGTCTGCTGGGTTTC#ACATTGTAGACAGGTAGCA#.(((((.((((((((...((...#))...))))))))))))).	2987	3006	1	-18.8	0	0.000878662	0.632	4.99383	3.73518	-5.57006	15	19	13	3UTR		0	0
hsa-miR-221-3p	NM_022465	IKZF4	AGCTACATTGTCTGCTGGGTTTC#CCTCCTTGACAATGTAGCA#.(((((((((((....(((....#)))....))))))))))).	4155	4174	1	-20.8	1	0.000144326	0.574	1.70929	0.773992	-6.90779	14	19	11	3UTR		1	0
hsa-miR-221-3p	NM_022467	CHST8	AGCTACATTGTCTGCTGGGTTTC#GGAGCTCAGCCGACAGTTTTGATGAGCA#.(((.(((((((.((((((((((#)))))))))).))))......)))))).	2286	2314	1	-22.6	0	0.020734	0.368	0.447786	0.0856841	-9.20149	20	28	10	3UTR		0	0
hsa-miR-221-3p	NM_022497	MRPS25	AGCTACATTGTCTGCTGGGTTTC#GAAACTCAGCCAAGGAGACCTGACTTTATCTGAGACAGGAAGGCA#.(((...((((((((((((((((#))))))))))......................))))))...))).	1946	1991	1	-21.2	0	0.00566855	0.574	-0.0734566	-0.0450636	-11.357	19	45	10	3UTR		0	0
hsa-miR-221-3p	NM_022719	ESS2	AGCTACATTGTCTGCTGGGTTTC#GACCCAGCAGGAAGCACAAAAGACCGGCCAGTGTGCC#.((.(((((((((((((((((..#))))))))))).................)))))))).	2428	2465	1	-24	0	0.000608224	0.426	0.877337	0.503069	-6.82535	19	37	11	3UTR		0	0
hsa-miR-221-3p	NM_022725	FANCF	AGCTACATTGTCTGCTGGGTTTC#GAAGCCTAGCACAGTGTCCAGCA#.((((((((((..((((((((((#)))))))))))))))))..))).	3145	3168	1	-24.7	1	0.00632251	0.662	1.38178	1.23553	-8.42926	20	23	17	3UTR		0	0
hsa-miR-221-3p	NM_022746	MTARC1	AGCTACATTGTCTGCTGGGTTTC#ACCCTCGGTGGGCATCTCCTCTGTGTGGCA#.(((((((((((((((((((...#))))..))))))))........))))))).	3444	3474	1	-21.5	1	0.00267889	0.456	-0.193772	-0.19149	-3.79332	19	30	8	3UTR		0	0
hsa-miR-221-3p	NM_022755	IPPK	AGCTACATTGTCTGCTGGGTTTC#GGAACCAGGATAAGGGTGGCTTCTCCCAGCTGAGTAATGTGGCC#.(((((((((((.((((((....#.)))))).)).))))))))).	3920	3964	1	-25.2	1	8.42755e-05	0.426	3.84821	3.26732	-5.08246	17	21	9	3UTR		0	0
hsa-miR-221-3p	NM_022758	ILRUN	AGCTACATTGTCTGCTGGGTTTC#GAGCCCAGCAGGAGAGGATGGTAGG#..(((((((.((((((((((((.#))))))))))...)).)))).))).	3862	3887	1	-23.3	1	0.0032048	0.456	3.73553	5.11622	-6.19951	19	25	10	3UTR		0	0
hsa-miR-221-3p	NM_022761	C11orf1	AGCTACATTGTCTGCTGGGTTTC#AAGACCAGCCTGGCCAATGTGGTG#.(((((((((...((((((((..#.))))))))))))))))).	1541	1565	1	-20.5	1	0.00010886	0.559	0.176183	0.0687246	-11.254	17	19	17	3UTR		0	0
hsa-miR-221-3p	NM_022767	AEN	AGCTACATTGTCTGCTGGGTTTC#GGGCCCAGCAGGAGTAGGGAATGTGCC#.((.(((((.((((((((((((.#)))))))))))......).))))))).	1360	1387	1	-22.2	0	0.000312872	0.397	-0.152383	-0.222135	-8.06785	19	27	11	3UTR		0	0
hsa-miR-221-3p	NM_022780	RMND5A	AGCTACATTGTCTGCTGGGTTTC#TCCAGCAAGGCAGTTGTGGG#..(((((((((((((((((....#))))))).)))))).)))).	5439	5459	1	-21.9	1	0.000288196	0.544	0.766397	0.771491	-4.957	17	20	7	3UTR		0	0
hsa-miR-221-3p	NM_022785	EFCAB6	AGCTACATTGTCTGCTGGGTTTC#GCCCAGCGGGACGACAGCC#.(((...(((((((((((((...#))))))))).)))).))).	4803	4822	1	-22	0	0.000104419	0.441	0.0588856	0.325488	-11.357	16	19	9	3UTR		0	0
hsa-miR-221-3p	NM_022817	PER2	AGCTACATTGTCTGCTGGGTTTC#GAAGCCTAGTGGTTTGTGTGGCC#.(((((((...((((((((((((#))))))))))))...))))))).	4707	4730	1	-26.8	1	2.52526e-06	0.5	3.26169	2.62447	-8.917	19	23	12	3UTR		0	0
hsa-miR-221-3p	NM_022842	CDCP1	AGCTACATTGTCTGCTGGGTTTC#GGGGCCCAGCCTGAGGAACCCTGGCTC#(((((..((.((.((((((((((#))))))))))..)).))....))))).	5325	5352	1	-21.6	0	1.7942e-05	0.412	3.10818	1.73809	-9.91386	19	27	10	3UTR		0	0
hsa-miR-221-3p	NM_022901	LRRC19	AGCTACATTGTCTGCTGGGTTTC#ATTCAGTAGATAGAGCA#.(((...(((((((((((((...#)))))))))))))))).	2010	2027	1	-16.9	0	0.00483469	0.662	0.636151	0.300195	-11.357	16	17	16	3UTR		0	1
hsa-miR-221-3p	NM_022903	CCDC71	AGCTACATTGTCTGCTGGGTTTC#GAAACTAAGCCCAGCTGTCTGTGTGGCTA#((((((((.(.(.(((((((((.#.))))))))).).).)))))))).	1545	1574	1	-27.7	1	9.99574e-05	0.471	3.14243	3.92523	-9.10787	19	24	9	3UTR		0	0
hsa-miR-221-3p	NM_023000	ARID4A	AGCTACATTGTCTGCTGGGTTTC#GGAGCTCAGTGGGCAGTA#......(((((((((((((((((#))))))))))))))))).	5515	5533	1	-22.3	0	0.00100539	0.662	3.51691	2.96393	-15.5666	17	18	17	3UTR		0	0
hsa-miR-221-3p	NM_023037	FRY	AGCTACATTGTCTGCTGGGTTTC#ACCCAGCAGAGAACCACCGTGATGGTTT#(((((((((.((((((((((...#)))))))))).)......))).))))).	11063	11091	1	-21.5	1	0.000225872	0.603	0.45549	-0.19063	-5.18008	19	28	10	3UTR		1	1
hsa-miR-221-3p	NM_023067	FOXL2	AGCTACATTGTCTGCTGGGTTTC#GAAACCCGGCAGCGGCCGACCTAGGCGGTCTTGTGGCC#.(((((((((.((((((((((((#)))))))))))))))................)))))).	2710	2748	1	-26.9	1	2.45846e-05	0.309	0.048979	0.362573	-6.6181	21	38	15	3UTR		0	0
hsa-miR-221-3p	NM_023934	FUNDC2	AGCTACATTGTCTGCTGGGTTTC#GAAGCCCATCAGATACCAGTGCCATGCTT#(((..(((((((((.((((((((#)))))))).))))...)))))....))).	5964	5993	1	-21.4	0	0.0240808	0.426	0.187679	0.0603114	-11.8241	20	29	8	3UTR		0	0
hsa-miR-221-3p	NM_024009	GJB3	AGCTACATTGTCTGCTGGGTTTC#GGGACATGCAGGGCGGTGTGGCA#.((((((((((((((...(((((#)))))..))))).))))))))).	1441	1464	1	-23	1	0.000879936	0.353	-0.0547509	0.0227752	-4.02637	19	23	9	3UTR		0	0
hsa-miR-221-3p	NM_024025	DUSP26	AGCTACATTGTCTGCTGGGTTTC#GAGGCCCAGGTGGCAGGTAGCA#.(((((.(((((..(((((((((#)))))))))..)))))))))).	1134	1156	1	-27.5	0	0.00172755	0.338	3.67308	4.10542	-7.48298	19	22	10	3UTR		0	0
hsa-miR-221-3p	NM_024050	DDA1	AGCTACATTGTCTGCTGGGTTTC#AGACCCAGTAGTGTGATGTTGGTA#.(((((((((.(((((((((((.#)))))))))))..)))))).))).	618	642	1	-22.5	1	6.21469e-05	0.618	1.34086	1.52907	-6.6181	20	24	11	3UTR		0	0
hsa-miR-221-3p	NM_024056	TMEM106C	AGCTACATTGTCTGCTGGGTTTC#GAATCAGTGCCTAGCCTGTGCCCAGCAAATAGTTGGCA#.((((.(((((.((((((((...#.)))))))).))))))))).	1015	1053	1	-22.3	0	0.000230393	0.603	0.0734882	0.241356	-9.04109	17	20	9	3UTR		0	0
hsa-miR-221-3p	NM_024090	ELOVL6	AGCTACATTGTCTGCTGGGTTTC#GAATGTCCCAGTAGTCAAATGTAGTG#.(((((((((.((((((((....#.)))))))).))).)))))).	5291	5317	1	-24.1	1	0.0109938	0.618	3.63476	2.26074	-6.6181	17	21	8	3UTR		0	0
hsa-miR-221-3p	NM_024096	DCTPP1	AGCTACATTGTCTGCTGGGTTTC#GAGGCCCAGCAGCCTCTAGAAGGTAGCC#.(((((.((.(((((((((((((#)))))))))))).....).)).))))).	689	717	1	-26.2	0	0.000131389	0.471	1.58773	1.15645	-6.57952	20	28	12	3UTR		0	0
hsa-miR-221-3p	NM_024111	CHAC1	AGCTACATTGTCTGCTGGGTTTC#GGATCCCAGCAGGCTGGATGAGG#..((.((((((((((((((.(((#))).))))))))))..)))))).	1201	1224	1	-23.6	0	0.00602738	0.426	0.0896589	-0.0308852	-9.07604	19	23	10	3UTR		0	0
hsa-miR-221-3p	NM_024120	NDUFAF5	AGCTACATTGTCTGCTGGGTTTC#GAGCCCAGGAGGTCAAGGCTGCAGCA#.(((.((((((((.((((((((.#)))))))).))).)))...)).))).	4481	4507	1	-21.1	0	0.0165555	0.397	-0.092685	-0.00885727	-8.7692	19	26	8	3UTR		0	0
hsa-miR-221-3p	NM_024121	TMEM185B	AGCTACATTGTCTGCTGGGTTTC#GGAGCCCAGCCATGTAGGTAGAAGCAGCAGACGGTGAGG#..((.((((((((((((((((((#))))))))))..................)))))))))).	4828	4867	1	-24.2	0	0.000980377	0.324	5.03321	4.2667	-9.07604	20	39	10	3UTR		0	0
hsa-miR-221-3p	NM_024332	BRCC3	AGCTACATTGTCTGCTGGGTTTC#AGACCCAGCAGTTGTGCTC#(((.(((....(((((((((((.#))))))))))).)))))).	2250	2269	1	-21.2	0	0.000997341	0.632	0.2451	0.236182	-14.4069	17	19	11	3UTR		0	0
hsa-miR-221-3p	NM_024334	TMEM43	AGCTACATTGTCTGCTGGGTTTC#GGACCCCTCAAAGCAGGCACACCCAAAACACAAGTCTGTGGCTA#(((((((.((((((((((((((.#)))))).....)))))))).................))))))).	1849	1893	1	-23	1	0.000998558	0.544	-0.883702	-0.51807	-6.25121	21	44	8	3UTR		0	0
hsa-miR-221-3p	NM_024341	ZNF557	AGCTACATTGTCTGCTGGGTTTC#GGGATCAAGTAATTCTCCTGCCCCAGCCTCCAATGTAGCTG#((((((((((...((((((....#.))))))...)))))))))).	2234	2275	1	-26.6	1	5.79446e-05	0.471	-0.250433	-0.3562	-11.3983	16	21	10	3UTR		0	0
hsa-miR-221-3p	NM_024503	HIVEP3	AGCTACATTGTCTGCTGGGTTTC#CCCAGCAGGCAGGCC#.(((....(((((((((((....#)))))))))))))).	9100	9115	1	-22.9	0	0.000473127	0.471	1.30786	2.57868	-13.6706	14	15	14	3UTR		0	0
hsa-miR-221-3p	NM_024508	ZBED2	AGCTACATTGTCTGCTGGGTTTC#GACCCAGCAAGTGGAAGGACAAAGAACTGTGAGCC#.((((((((((((((((((((..#)))))))))........))))).....))).))).	2090	2125	1	-21	1	0.00193385	0.5	-0.374864	0.119555	-3.79332	20	35	9	3UTR		0	0
hsa-miR-221-3p	NM_024509	LRFN3	AGCTACATTGTCTGCTGGGTTTC#ATCCCCAGACAGTGATAGCA#.(((((((((((((..((((...#)))).))))))))).)))).	3526	3546	1	-21.1	1	0.000303623	0.456	-0.313985	-0.0203562	-4.76182	17	20	9	3UTR		0	0
hsa-miR-221-3p	NM_024518	ULBP3	AGCTACATTGTCTGCTGGGTTTC#GGAGTTCAAGCCTTAGCAAGCCCAGAGGCCCCCAGCAGATGATGAGG#..((.((((((((((((((....#.)))))))))))))))).	914	961	1	-25.4	0	0.00107043	0.426	0.164181	0.095167	-9.07604	16	18	16	3UTR		0	0
hsa-miR-221-3p	NM_024560	ACSS3	AGCTACATTGTCTGCTGGGTTTC#GGACCCAGCAGAATATGGCC#.((..(((..((((((((((((.#))))))))))))..))))).	3354	3374	1	-23.7	0	0.00451904	0.456	0	0	-13.2433	17	20	12	3UTR		0	0
hsa-miR-221-3p	NM_024569	MPZL1	AGCTACATTGTCTGCTGGGTTTC#GAGACAATAGCAGATCCTGTAGTA#.((((((..((((((((.(((((#)))))..))))))))..)))))).	1215	1239	1	-23.1	1	0.00471144	0.618	0.7452	0.621672	-7.16335	19	24	8	3UTR		0	1
hsa-miR-221-3p	NM_024577	SH3TC2	AGCTACATTGTCTGCTGGGTTTC#GAAACCCAGCCAAATATGTGGA#..((((((.....((((((((((#)))))))))).....)))))).	21038	21060	1	-23.7	1	0.0102649	0.603	-0.0795393	-0.136934	-14.7166	16	22	10	3UTR		0	0
hsa-miR-221-3p	NM_024584	CCDC121	AGCTACATTGTCTGCTGGGTTTC#AACTTAGCAGACAAAAGCA#.(((...((((((((((((((..#)))))))))))))).))).	1456	1475	1	-22.8	0	0.0176665	0.618	1.27616	0.184825	-11.357	17	19	14	3UTR		0	0
hsa-miR-221-3p	NM_024594	PANK3	AGCTACATTGTCTGCTGGGTTTC#ACTCAGCAGAGGCAATGTT#....((((((((((((((((...#)))))))))..))))))).	2741	2760	1	-20.7	0	0.0042855	0.618	0.24282	0.282371	-9.54656	16	19	9	3UTR	MIRT024196	1	1
hsa-miR-221-3p	NM_024604	RPAP3	AGCTACATTGTCTGCTGGGTTTC#CCCAGAGACATTTTCATGTAGTG#.((((((((((((.(((((....#)))))))))).....))))))).	3996	4019	1	-21	1	0.0185528	0.559	3.20664	3.28142	-4.65016	17	23	10	3UTR		0	0
hsa-miR-221-3p	NM_024611	ICE2	AGCTACATTGTCTGCTGGGTTTC#GCTTAGCAGATATTAGTTAGATGCATGAATGTGTAGGTA#(.((((((((((((((((((...#))))))))))))..................)))))).).	5920	5959	1	-20.3	1	0.00542413	0.676	2.13229	2.64865	-5.10125	19	39	12	3UTR		0	0
hsa-miR-221-3p	NM_024617	TUT7	AGCTACATTGTCTGCTGGGTTTC#AAGCCCTGCAGACATAGTACCTG#((.(((..(((((((.((((((.#)))))).)))))))..))).)).	5519	5542	1	-23.1	0	0.00120303	0.618	0.246978	0.422278	-9.58548	18	23	7	3UTR		0	0
hsa-miR-221-3p	NM_024621	VEPH1	AGCTACATTGTCTGCTGGGTTTC#GAGTATGCCCTCAGATAGTGTGGG#..((((((((((((..((((...#.)))).)))))))))))).	3169	3193	1	-23.3	1	1.12488e-05	0.544	2.67962	1.88552	-5.9255	16	19	12	3UTR		0	0
hsa-miR-221-3p	NM_024627	RTL10	AGCTACATTGTCTGCTGGGTTTC#GAACCCAGGAGGCAGAGGGTGTGGTG#.((((((((((((.((((((((.#)))))))).)))))....))))))).	3331	3357	1	-27	1	1.78263e-05	0.426	-0.0747111	-0.123264	-4.65016	20	26	8	3UTR		0	0
hsa-miR-221-3p	NM_024636	STEAP4	AGCTACATTGTCTGCTGGGTTTC#GGAGCTCAGTTTTGCTGGGAAAGTCTGGAAGACAGTGTCAGA#..(((((((((((((((((((((#))))))))))...................))))))))).)).	8561	8603	1	-21.5	1	0.00675429	0.559	3.47457	3.14184	-4.957	21	42	10	3UTR		0	0
hsa-miR-221-3p	NM_024654	NOL9	AGCTACATTGTCTGCTGGGTTTC#ACCCGGCTGGTGGCAGTGGCTT#((((((..((((.(((((((...#)))))))....)))))))))).	4668	4690	1	-20.6	0	2.79511e-05	0.441	2.34324	2.24065	-9.08403	17	22	10	3UTR		0	0
hsa-miR-221-3p	NM_024659	GTDC1	AGCTACATTGTCTGCTGGGTTTC#GGAGCAGGTGGCAATGTGGCA#.(((((((((((.(((..(((((#))))).)))))))))))))).	7700	7721	1	-22.5	1	0.000847913	0.397	0	0	-5.08246	19	21	14	3UTR		0	0
hsa-miR-221-3p	NM_024709	C1orf115	AGCTACATTGTCTGCTGGGTTTC#GGACCCAGTGGTCAATCCTGCA#.((...((((.(((((((((((.#))))))))))).))))...)).	669	691	1	-22.1	0	0.000718083	0.456	0.336147	-0.294286	-15.6701	17	22	11	3UTR		0	0
hsa-miR-221-3p	NM_024726	IQCA1	AGCTACATTGTCTGCTGGGTTTC#GAAGCCCTCAGGGGAAGGAACTTAGCAGTGTGCAGGTGAGCTG#((((...((((((((((((((((#.))))))))))))...))))...)))).	2799	2842	1	-23	0	8.77916e-05	0.426	4.12715	3.24765	-11.5013	20	28	12	3UTR		0	0
hsa-miR-221-3p	NM_024736	GSDMD	AGCTACATTGTCTGCTGGGTTTC#GGAGCCCAGTAGCCATGTGGCC#.(((((((.(.((((((((((((#))))))))))))).))))))).	1643	1665	1	-29.5	1	6.53353e-05	0.368	-0.26224	-0.700245	-7.67449	20	22	13	3UTR		0	0
hsa-miR-221-3p	NM_024782	NHEJ1	AGCTACATTGTCTGCTGGGTTTC#GGAACCCGGGAGGCAGAGGCTG#((((...((((((.(((((((((#))))))))).)))))).)))).	7090	7112	1	-26.2	0	5.00253e-05	0.368	1.01207	1.17126	-12.3581	19	22	9	3UTR		0	0
hsa-miR-221-3p	NM_024812	BAALC	AGCTACATTGTCTGCTGGGTTTC#GATCCAGAGACATGTGGCA#.((((((.(((((.(((((((..#)))))))))))))))))).	1503	1522	1	-24.2	1	0.000416763	0.412	-0.656167	-0.0290843	-6.9638	18	19	18	3UTR		0	0
hsa-miR-221-3p	NM_024825	PODNL1	AGCTACATTGTCTGCTGGGTTTC#GAGGCCCAGCAGAGCAGCTC#((((......(((((((((((((#)))))))))))))..)))).	2729	2749	1	-24.8	0	3.69881e-05	0.309	1.391	1.12627	-16.1138	17	20	13	3UTR		0	0
hsa-miR-221-3p	NM_024847	TMC7	AGCTACATTGTCTGCTGGGTTTC#GAGACCAGCCTGGTCAATGTGGCA#.(((((((((.(((((.((((((#)))))))))..)).))))))))).	3809	3833	1	-25.3	1	0.000161279	0.559	-0.11315	-0.0972383	-6.6181	20	24	9	3UTR		0	0
hsa-miR-221-3p	NM_024859	MAGIX	AGCTACATTGTCTGCTGGGTTTC#GAGCCTGGTGGAGGTGTGGTTC#((((((((..((((((((((((.#)))))))))))).)))))))).	2361	2383	1	-22.7	1	1.64744e-05	0.441	0	0	-6.23647	20	22	12	3UTR		0	0
hsa-miR-221-3p	NM_024873	TNIP3	AGCTACATTGTCTGCTGGGTTTC#GAGACTTGGCAGATGGATGATGCA#.((..((((.(((((((((((((#)))))))))))))..))))..)).	1414	1438	1	-22.2	0	0.0016558	0.574	2.09559	1.10009	-12.1869	19	24	13	3UTR		0	0
hsa-miR-221-3p	NM_024881	SLC35E1	AGCTACATTGTCTGCTGGGTTTC#CCCAGCCGGACAGTGCCCGCC#.((..((((((((((((((....#)))))).))))))))...)).	4547	4568	1	-23	0	6.86447e-05	0.397	0	0	-10.9444	16	21	8	3UTR		0	0
hsa-miR-221-3p	NM_024884	L2HGDH	AGCTACATTGTCTGCTGGGTTTC#GAAGCCAAGGCAGGTAGATTGTAGCC#.(((((((((((((((.((((((#))))))..)))))))))..)))))).	1839	1865	1	-23.5	1	0.00372937	0.456	0.0546378	0.0419212	-3.79332	21	26	9	3UTR		0	0
hsa-miR-221-3p	NM_024885	TAF7L	AGCTACATTGTCTGCTGGGTTTC#AAGGCCAGTATAAAAATGTAGTA#.((((((((...((((((.(((.#))).))))))....)))))))).	1595	1618	1	-19	1	0.0851922	0.603	1.6513	1.963	-11.2074	17	23	8	3UTR		0	0
hsa-miR-221-3p	NM_024936	ZCCHC4	AGCTACATTGTCTGCTGGGTTTC#TCCAGAGGTGTGCACCTTTCTGAGCTAGATAACAGGCAGGTGGCA#.(((((.(((((((((((.((..#.)).))))....)))))))))))).	1669	1714	1	-19.6	0	0.000639975	0.5	0.809944	0.936666	-5.33701	18	25	12	3UTR		0	0
hsa-miR-221-3p	NM_024939	ESRP2	AGCTACATTGTCTGCTGGGTTTC#GAACCCAGCAGACACCATGG#.....(((((((((((((((((.#))))))))))))))..))).	2990	3010	1	-26	0	0.000337845	0.5	2.91143	2.91997	-13.6656	17	20	14	3UTR		0	0
hsa-miR-221-3p	NM_024966	SEMA6D	AGCTACATTGTCTGCTGGGTTTC#GATGCTACATGCAGCAGACAGCTGTGAGCTT#(((((((((((((((((.((...#.)).)))))))))).))).)))).	2551	2582	1	-24.5	1	0.000144663	0.574	0.0503477	-0.148132	-3.93757	19	24	10	3UTR		1	1
hsa-miR-221-3p	NM_025103	IFT74	AGCTACATTGTCTGCTGGGTTTC#GAAATTCAGTAGATAAAACAGGTA#.(((...((((((((((((((((#))))))))))))))))....))).	3603	3627	1	-20	0	0.0485782	0.676	0.396931	0.256724	-11.357	19	24	16	3UTR		0	0
hsa-miR-221-3p	NM_025161	FAAP100	AGCTACATTGTCTGCTGGGTTTC#GAGGCCAGGAGGCAGTGCAGGGCA#.(((.((((((((.((((.(((.#))).)))).))))))))...))).	3001	3025	1	-24	0	0.00185161	0.324	-0.356424	0.902872	-8.7692	18	24	8	3UTR		0	0
hsa-miR-221-3p	NM_025180	CEP63	AGCTACATTGTCTGCTGGGTTTC#CCAGCTCAAGGGTGTGGCC#.((((((((....(((((.....#))))).....)))))))).	3615	3634	1	-19.7	1	1.1243e-05	0.485	0.00138837	-0.313091	-12.4965	13	19	8	3UTR		0	0
hsa-miR-221-3p	NM_001826	CKS1B	AGCTACATTGTCTGCTGGGTTTC#GAGCCACCACCACCATAGCCCAGCCAGATGAGTGCTC#(((.((.((((((((((((((..#.)))))))).))))))))))).	469	506	1	-22.3	0	0.000429219	0.426	-0.946895	-0.0315233	-8.51328	19	22	11	3UTR		0	0
hsa-miR-221-3p	NM_001859	SLC31A1	AGCTACATTGTCTGCTGGGTTTC#AGCCCTCCTGATGCAGTAGACAGTGCTATGCTG#(((((((((((((((((.(((..#.))).)))))))))))).)).))).	3863	3896	1	-24.3	1	2.66842e-05	0.544	0.247968	0.228271	-3.93757	20	25	12	3UTR		0	0
hsa-miR-221-3p	NM_001879	MASP1	AGCTACATTGTCTGCTGGGTTTC#GGGACCCAGCTCCATCAGACACTTGTCAAGCTA#(((((((.(((((((((((((((#))))))))))......)))))..)))..)))).	3803	3836	1	-24.8	1	0.0218982	0.529	2.92618	2.59957	-6.25121	22	33	10	3UTR		0	0
hsa-miR-221-3p	NM_001880	ATF2	AGCTACATTGTCTGCTGGGTTTC#ACCCAGTAGCAACTTCTGGCA#.((((..(((.(((((((((...#))))))))))))....)))).	3309	3330	1	-20.1	0	0.000338618	0.618	5.78569	5.88951	-10.0627	16	21	12	3UTR		0	0
hsa-miR-221-3p	NM_001884	HAPLN1	AGCTACATTGTCTGCTGGGTTTC#CCCAAACAGAAAATGTGGTTA#(((((((((.((((.((((....#))))..)))).))))))))).	2268	2289	1	-19.6	1	0.0426048	0.632	1.11458	1.64947	-5.91553	17	21	9	3UTR		0	0
hsa-miR-221-3p	NM_001894	CSNK1E	AGCTACATTGTCTGCTGGGTTTC#GAACAACAAAAAAACCCAGCACAAAACCGACGATGGAGTTT#((((.(((((((((((((((((.#.)))))))))).......))))))).)))).	1460	1501	1	-25.4	0	0.00123125	0.603	4.36519	3.68127	-8.05661	21	31	10	3UTR		0	0
hsa-miR-221-3p	NM_001895	CSNK2A1	AGCTACATTGTCTGCTGGGTTTC#GAGCCCAGGAGTTGGAGGCTGCAGTGAGCTA#((((.((((((((.((((((((.#)))))))).)).........)))))))))).	11210	11241	1	-24	0	5.97283e-05	0.456	3.11089	2.36686	-8.91345	20	31	10	3UTR		0	0
hsa-miR-221-3p	NM_001914	CYB5A	AGCTACATTGTCTGCTGGGTTTC#GAGGCAGGAGAATTGCTTGAACCCAGGAGGCAGAGGTTGTAGTG#.((((((((((((.((((((((.#.)))))))).))))))....)))))).	1280	1324	1	-26.9	1	0.00654628	0.456	0.311927	-0.00783958	-4.65016	20	27	8	3UTR		0	0
hsa-miR-221-3p	NM_001933	DLST	AGCTACATTGTCTGCTGGGTTTC#GAAACCCCTGGGGACCATGTGA#...(((((.((((.(.(((((((#)))))))..).)))).))))).	1737	1759	1	-21.2	0	5.838e-05	0.603	1.10303	0.443754	-8.66082	17	22	7	3UTR		0	0
hsa-miR-221-3p	NM_001938	DR1	AGCTACATTGTCTGCTGGGTTTC#AAACTCATGCAGATATGTGGA#..(((((.((((((((((((((.#))))))).)))))))))))).	8265	8286	1	-21.9	0	0.000813552	0.559	0.0892615	0.105328	-7.27064	19	21	12	3UTR		0	0
hsa-miR-221-3p	NM_001949	E2F3	AGCTACATTGTCTGCTGGGTTTC#GAACCAGGTCAGATGATGTAACAGCC#.(((((((((((((((.(((((.#))))).)).))))))))))...))).	2828	2854	1	-20.4	1	0.0531674	0.441	0.454114	0.510841	-3.79332	20	26	10	3UTR	MIRT024159	0	0
hsa-miR-221-3p	NM_001962	EFNA5	AGCTACATTGTCTGCTGGGTTTC#GAAAATAGCAAGAGTGTCCACACCAGTAGACAGTAAGCTT#((((..((((((((((((((...#.)).)))))))))))).)))).	3603	3643	1	-23	0	0.000917669	0.603	1.13581	1.62686	-9.95757	18	22	12	3UTR		0	0
hsa-miR-221-3p	NM_001966	EHHADH	AGCTACATTGTCTGCTGGGTTTC#GAGACCAGCCTGGGCAACATAGCA#.((((..(((((((((.((((((#)))))))))..))))))..)))).	3247	3271	1	-21.3	0	0.00486007	0.559	1.17192	1.39497	-7.23797	19	24	9	3UTR		0	0
hsa-miR-221-3p	NM_001982	ERBB3	AGCTACATTGTCTGCTGGGTTTC#GAAACCTAGCAGAGGAAAGTGTAA#...((((((.(((((((((((((#))))))))))))).)...))))).	4560	4584	1	-24.8	0	0.0745087	0.574	0.138422	0.21759	-7.75705	19	24	13	3UTR		1	0
hsa-miR-221-3p	NM_001990	EYA3	AGCTACATTGTCTGCTGGGTTTC#GCCTGGCCAGGCACTGTGGG#..(((((.((((((((((((...#))))))).))))).))))).	5023	5043	1	-22	0	9.27e-06	0.426	2.54476	2.84638	-7.27064	17	20	7	3UTR		0	0
hsa-miR-221-3p	NM_002003	FCN1	AGCTACATTGTCTGCTGGGTTTC#GGGCCAGCAGGCAGGACTCAGCAGTGGTGGCTC#((((((.....(((((((((((.#.)))))))))))..)))))).	2060	2093	1	-23.4	0	0.000198432	0.397	0	0	-12.9186	17	21	11	3UTR		0	0
hsa-miR-221-3p	NM_002023	FMOD	AGCTACATTGTCTGCTGGGTTTC#AGCCCAAAGAAGGAGGATGTGGTTA#(((((((((.(((..((((((..#)))))).....))).))))))))).	2304	2329	1	-21.3	1	0.00220203	0.485	0	0	-6.77237	18	25	9	3UTR		0	0
hsa-miR-221-3p	NM_002025	AFF2	AGCTACATTGTCTGCTGGGTTTC#AAACCCACTGGTTAGATGTTGTAGCA#.((((((.((((((((((((((.#)))))))...)).))))).)))))).	4927	4953	1	-21.2	1	0.000403821	0.691	0	0	-6.10696	20	26	7	3UTR		0	0
hsa-miR-221-3p	NM_002043	GABRR2	AGCTACATTGTCTGCTGGGTTTC#GAAGTTACACAGATAGCACTAATTTTGCCCAGCAATGACATGTAGCA#.((((((.((((((((((((...#.))))))))..)))))))))).	2356	2403	1	-28	1	0.000501011	0.559	0	0	-6.10696	18	22	10	3UTR		0	0
hsa-miR-221-3p	NM_002056	GFPT1	AGCTACATTGTCTGCTGGGTTTC#GAGACCTGGTCTTTACAAAAATTTTTTTGGCCGGACGCAGTGGCTC#((((((..(((((((((((((((#))))))))))......................)))))..)))))).	4389	4435	1	-21.5	0	0.000373765	0.5	0	0	-7.7949	21	46	10	3UTR		0	0
hsa-miR-221-3p	NM_002062	GLP1R	AGCTACATTGTCTGCTGGGTTTC#GGGGCCTGCCAAACTATCAGTAATTAGCCAGCCTAGACAATGTAGCA#.(((((((((((((((((.(...#.).)))))..)))))))))))).	6047	6094	1	-28.3	1	0.00860836	0.632	0	0	-3.79332	18	23	12	3UTR		0	0
hsa-miR-221-3p	NM_002065	GLUL	AGCTACATTGTCTGCTGGGTTTC#GAGACCGTTCTAGGCAATGTAGTG#.(((((((((((((...((((((#))))))....))))))))))))).	5492	5516	1	-24.7	1	0.00379797	0.574	0	0	-4.76182	19	24	13	3UTR		0	0
hsa-miR-221-3p	NM_002067	GNA11	AGCTACATTGTCTGCTGGGTTTC#CAGCAGATCCTGTGGCC#.((((((..((((((((......#))))))))..)))))).	3875	3892	1	-22	1	5.49896e-06	0.353	0	0	-7.16335	14	17	8	3UTR		0	0
hsa-miR-221-3p	NM_002072	GNAQ	AGCTACATTGTCTGCTGGGTTTC#ACCCTAGCAGCAGTGATGCA#.((..(((((.(((((((((...#)))).))))))))))..)).	4546	4566	1	-21.6	0	0.000823985	0.603	0	0	-13.7692	16	20	10	3UTR		0	0
hsa-miR-221-3p	NM_002077	GOLGA1	AGCTACATTGTCTGCTGGGTTTC#ATCTGGCAGGCACACCTGAGTCACCATGTAGCG#.(((((((((((((((((((...#)))))))))))).............))))))).	2951	2984	1	-23.4	1	0.000375828	0.426	0	0	-3.79332	19	33	12	3UTR		0	1
hsa-miR-221-3p	NM_002092	GRSF1	AGCTACATTGTCTGCTGGGTTTC#GAGGCCAAGGCAGGAGAATCGCTTGAACCTGGGAGGCAGAGGTTGTAGCG#.((((((((((((.((((((((.#.)))))))).))))))....)))))).	4231	4281	1	-25.6	1	5.97353e-05	0.441	0	0	-4.65016	20	27	8	3UTR		0	0
hsa-miR-221-3p	NM_002093	GSK3B	AGCTACATTGTCTGCTGGGTTTC#GAACCAGTACCCAGAAAGACAACTGTGAGCC#.((((((((((((.((((((...#.))))))..)))))).))).))).	4248	4279	1	-22.3	1	0.00870175	0.529	0	0	-4.65016	18	24	6	3UTR		0	0
hsa-miR-221-3p	NM_002098	GUCA1B	AGCTACATTGTCTGCTGGGTTTC#CTTGGCAGCACAGTGAGCA#.(((.((((((((((((((....#)))))))).))))))))).	1939	1958	1	-21.1	0	0.00328539	0.5	0	0	-7.91236	17	19	9	3UTR		0	0
hsa-miR-221-3p	NM_002102	GYPE	AGCTACATTGTCTGCTGGGTTTC#GATAAAGGCATGAGGATGTGGCC#.((((((((.((((((.......#.)))).)).)))))))).	291	314	1	-19.1	1	4.00912e-05	0.515	0	0	-5.03583	14	18	8	3UTR		0	0
hsa-miR-221-3p	NM_002121	HLA-DPB1	AGCTACATTGTCTGCTGGGTTTC#AAACCCGGCGGGCTTAGGACTCCCAGCTGAGTGTTGTA#.((.((((((((((((((((((.#)))))))))))))................))))).)).	3162	3200	1	-22.7	0	0.000328316	0.426	0	0	-6.82535	20	38	13	3UTR		0	0
hsa-miR-221-3p	NM_002133	HMOX1	AGCTACATTGTCTGCTGGGTTTC#TGCAGCAGAGCCTGGAAGACACCCTAATGTGGCA#.((((((((((((.((((((((.#.)))))))).))))).....))))))).	1204	1238	1	-23.7	1	0.00131668	0.456	0	0	-4.65016	20	28	8	3UTR		0	0
hsa-miR-221-3p	NM_002192	INHBA	AGCTACATTGTCTGCTGGGTTTC#GGAACCTGCAGAAACAGTGTGA#...((((((((((((.(((((((#))))))))))))..))))))).	4239	4261	1	-21.4	0	0.0200865	0.529	0	0	-6.74759	19	22	12	3UTR		0	0
hsa-miR-221-3p	NM_002208	ITGAE	AGCTACATTGTCTGCTGGGTTTC#GAGACCCAGCATCCTTTGCATTACTTTTTCCTTCAGGATGATCTAGAGCA#.(((..(((((((((((((((((#))))))))))).........................))))))....))).	3630	3680	1	-21.4	0	3.38851e-05	0.618	0	0	-9.81332	20	50	11	3UTR		0	0
hsa-miR-221-3p	NM_002223	ITPR2	AGCTACATTGTCTGCTGGGTTTC#GGGACCCAGTAGATTGGACGTAAGCA#.(((((...((((((((((((((#)))))))))))))).....))).)).	11810	11836	1	-24.7	0	0.0113624	0.588	0	0	-8.70704	19	26	14	3UTR		0	1
hsa-miR-221-3p	NM_002225	IVD	AGCTACATTGTCTGCTGGGTTTC#AGCCTGGAGACAATGTGGCA#.((((((((((((.(((((((..#))))))))))))))))))).	4208	4228	1	-27.5	1	0.0463582	0.471	0	0	-4.65016	19	20	19	3UTR		0	0
hsa-miR-221-3p	NM_002241	KCNJ10	AGCTACATTGTCTGCTGGGTTTC#CCCAGCAGCGTCCTGCCACTGTAGCG#.((((((.((.((((((((....#))))))))........)).)))))).	4352	4378	1	-22.2	1	0.00126413	0.588	0	0	-8.93173	16	26	8	3UTR		0	0
hsa-miR-221-3p	NM_002242	KCNJ13	AGCTACATTGTCTGCTGGGTTTC#ACCCAGCCAGTTATGCAGCTA#((((.(((...(((((((((...#))))))).))..))).)))).	1250	1271	1	-19.4	0	0.0176102	0.691	0.552955	0.793421	-13.1803	16	21	7	3UTR		0	0
hsa-miR-221-3p	NM_002251	KCNS1	AGCTACATTGTCTGCTGGGTTTC#GACCCAGAGGGCAATGAAAGCC#.(((.((((((((.(((((((..#))))))).))))))))..))).	2919	2941	1	-24.6	0	0.000583799	0.529	0	0	-8.7692	18	22	8	3UTR		0	0
hsa-miR-221-3p	NM_002253	KDR	AGCTACATTGTCTGCTGGGTTTC#CCAGCAGGAAGTAGCC#.(((((....((((((((.....#))))))))..))))).	4450	4466	1	-20.7	0	0.000956223	0.618	0	0	-9.94954	13	16	8	3UTR		1	1
hsa-miR-221-3p	NM_002260	KLRC2	AGCTACATTGTCTGCTGGGTTTC#AAACCCATGGAGACAGAAAGTAGA#..((((.((((((.((((((((.#))))))).).))))))...)))).	996	1020	1	-21.2	0	0.0256638	0.544	0	0	-7.35753	18	24	7	3UTR		0	0
hsa-miR-221-3p	NM_002264	KPNA1	AGCTACATTGTCTGCTGGGTTTC#GGATGTAAAGGCATCTGGTATCTGATGGACCAGCAGGTAGATGTGGTTG#(((((((((.((((((((...((#.))....))))))))..))))))))).	4703	4752	1	-23.6	1	0.00368593	0.559	0	0	-5.18008	19	27	9	3UTR		1	1
hsa-miR-221-3p	NM_002272	KRT4	AGCTACATTGTCTGCTGGGTTTC#ACCCGGCAGCACTTGGCC#.((((...((.(((((((((...#)))))))))))..)))).	2021	2039	1	-20.6	0	0.000489277	0.485	0	0	-12.3764	15	18	11	3UTR		0	0
hsa-miR-221-3p	NM_002285	AFF3	AGCTACATTGTCTGCTGGGTTTC#GAAGCACCAGGGGTATTGATGTAGCC#.(((((((((.((.(((((((((#))))).)))).))...))))))))).	9791	9817	1	-24	1	9.09752e-05	0.544	0	0	-7.47494	20	26	9	3UTR		0	0
hsa-miR-221-3p	NM_002313	ABLIM1	AGCTACATTGTCTGCTGGGTTTC#GGGACCTGGCTGGCAAATGACTTAGCTA#((((((((((((.((((((((((#)))))))))).))))).))...))))).	3039	3067	1	-23.4	1	0.0133421	0.618	0	0	-5.22671	22	28	10	3UTR	MIRT441688	0	0
hsa-miR-221-3p	NM_002318	LOXL2	AGCTACATTGTCTGCTGGGTTTC#GAGGCCCACAGACAGGTTGTCATCAGCTT#((((((((((((((.((((((((#)))))))))))))))..)))....)))).	2855	2884	1	-23.6	1	1.17897e-05	0.426	0	0	-4.67302	22	29	15	3UTR		0	0
hsa-miR-221-3p	NM_002334	LRP4	AGCTACATTGTCTGCTGGGTTTC#AGCCCAGCAGGTATGGGCA#.(((.(((..(((((((((((..#))))))))))).)))))).	6384	6403	1	-23.4	0	0.000349516	0.485	0	0	-10.2113	17	19	11	3UTR		0	0
hsa-miR-221-3p	NM_002340	LSS	AGCTACATTGTCTGCTGGGTTTC#GAGGCCCAGCCTGGTTTAGGGAACAAGAGTGACGTGAGGAGTAGCA#.(((((.((.((.((((((((((#)))))))))).........................)).))))))).	4298	4344	1	-22.8	0	0.000622174	0.471	0	0	-7.86865	19	46	10	3UTR		0	0
hsa-miR-221-3p	NM_002379	MATN1	AGCTACATTGTCTGCTGGGTTTC#GGGGCTAGAGGCAGTGTGGTTA#(((((((((((((.((((.(((.#))).))))))))))))))))).	1959	1981	1	-22.6	1	0.00365001	0.515	0.834361	1.03485	-4.79441	20	22	17	3UTR		0	0
hsa-miR-221-3p	NM_002383	MAZ	AGCTACATTGTCTGCTGGGTTTC#CCCTGGACAGTGGGCAGGGGTGGCA#.(((((.((((((((((......#.))))))))))..))))).	1846	1871	1	-21	0	5.59724e-07	0.353	0	0	-5.33701	15	19	10	3UTR		0	0
hsa-miR-221-3p	NM_002408	MGAT2	AGCTACATTGTCTGCTGGGTTTC#AAACCCAGCTTATGACAATGC#.....(((((((.(((((((((.#)))))))))....))))))).	2661	2682	1	-21.8	0	0.000152176	0.7	0.777846	0.26364	-14.9547	16	21	9	3UTR		0	0
hsa-miR-221-3p	NM_002439	MSH3	AGCTACATTGTCTGCTGGGTTTC#GAATTGGCCAGGCATGGTGGCTC#((((((..((((((.(.(((((.#))))).).))))))..)))))).	3943	3966	1	-19.8	0	3.08979e-06	0.529	0	0	-8.53035	18	23	6	3UTR		0	0
hsa-miR-221-3p	NM_002460	IRF4	AGCTACATTGTCTGCTGGGTTTC#ACTCAGTGGACAGTGCTGTTG#(((..(((((((((((((((...#)))))))))))))))..))).	4030	4051	1	-23.6	0	0.00100916	0.618	0	0	-11.0886	18	21	15	3UTR		0	0
hsa-miR-221-3p	NM_002474	MYH11	AGCTACATTGTCTGCTGGGTTTC#GAACAAAGCAAAACCCAGCAGACTGTACTTAGCA#.((((.((.(((((((((((((.#.))))))))))))).))...)))).	6104	6138	1	-28	0	0.00498246	0.618	0	0	-6.75067	19	25	13	3UTR		0	0
hsa-miR-221-3p	NM_002480	PPP1R12A	AGCTACATTGTCTGCTGGGTTTC#AACCCAGTGGACCATAATTGGCA#.((((.((.((((((((((((..#)))))))))))).))...)))).	3300	3323	1	-22.5	0	9.2845e-05	0.559	0	0	-6.75067	18	23	12	3UTR		0	0
hsa-miR-221-3p	NM_002499	NEO1	AGCTACATTGTCTGCTGGGTTTC#GAAGCCTGCAGAGAATGGAAGCA#.(((.((((.(((((.(((((((#)))))))))))).))))..))).	5471	5494	1	-25.2	0	0.000590512	0.574	0	0	-9.38792	19	23	12	3UTR		0	0
hsa-miR-221-3p	NM_002535	OAS2	AGCTACATTGTCTGCTGGGTTTC#GAAACCCAGCTCACAGGAGCTT#((((.(.((((..((((((((((#))))))))))..))))))))).	2248	2270	1	-24.3	0	7.00569e-06	0.471	0	0	-14.2362	19	22	10	3UTR		0	0
hsa-miR-221-3p	NM_002558	P2RX1	AGCTACATTGTCTGCTGGGTTTC#GAACTAGCCACATTTCAACTGCTCAGTAGATACGTGTGGTTA#((((((((((((((((((((...#.)))))))))))).)))))))).	1874	1916	1	-25.5	1	0.00463442	0.471	0	0	-3.93757	20	23	12	3UTR		0	0
hsa-miR-221-3p	NM_002562	P2RX7	AGCTACATTGTCTGCTGGGTTTC#GAACCCGGGAGGCAGAGGTTGTAGTG#.((((((((((((.((((((((.#)))))))).))))))....)))))).	2084	2110	1	-25.8	1	2.07375e-05	0.441	0	0	-4.65016	20	26	8	3UTR		0	0
hsa-miR-221-3p	NM_002579	PALM	AGCTACATTGTCTGCTGGGTTTC#GGGCCCAACCAGTGGACAATGGAGTC#.(((.(((((((((((((.....#.))))))))))))).))).	1978	2004	1	-23.7	0	0.000757091	0.338	0	0	-7.91236	16	19	13	3UTR		0	0
hsa-miR-221-3p	NM_002583	PAWR	AGCTACATTGTCTGCTGGGTTTC#AAACCCAGGAGACAGAGGTTGCG#.((.((.((((((.((((((((.#)))))))).))))))..)).)).	3571	3594	1	-25	0	0.000344972	0.471	0	0	-9.22587	18	23	8	3UTR		0	0
hsa-miR-221-3p	NM_002635	SLC25A3	AGCTACATTGTCTGCTGGGTTTC#GAACCCGGGAGGCAGAGGTTGCA#.((.((.((((((.((((((((.#)))))))).))))))..)).)).	5355	5378	1	-24.2	0	1.88623e-05	0.426	0	0	-9.22587	18	23	8	3UTR		0	0
hsa-miR-221-3p	NM_002689	POLA2	AGCTACATTGTCTGCTGGGTTTC#AGGCCCAGCAGGGAGGACTTGTGCA#.((.(((((.((((((((((((.#)))))))))))).))....))))).	2267	2292	1	-23.2	0	0.0138008	0.324	0	0	-8.06785	19	25	12	3UTR		0	0
hsa-miR-221-3p	NM_002704	PPBP	AGCTACATTGTCTGCTGGGTTTC#GGAGCCCAACAGAGAATATTTGCTC#(((...(((.((((.((((((((#)))))))).)))).)))....))).	854	879	1	-20.9	0	0.00712154	0.706	0.0792349	0.436098	-14.9675	18	25	8	3UTR		0	0
hsa-miR-221-3p	NM_002711	PPP1R3A	AGCTACATTGTCTGCTGGGTTTC#CTTAGCAGGCTATGAAGTTG#((((.(((.((((((((((....#)))))))))).))).)))).	3638	3658	1	-20	0	0.000127184	0.588	2.75686	3.37389	-9.113	17	20	10	3UTR		0	0
hsa-miR-221-3p	NM_002737	PRKCA	AGCTACATTGTCTGCTGGGTTTC#GAGCCTAGGAGACAAAAGGGCC#.(((...((((((.((((((((.#)))))))).))))))...))).	4739	4761	1	-23.4	0	0.0267505	0.441	0	0	-12.2138	17	22	8	3UTR		0	0
hsa-miR-221-3p	NM_002738	PRKCB	AGCTACATTGTCTGCTGGGTTTC#GGAGCCTAGCAGACTCAGGCCTGTGGG#..(((((..((((((((((((((#)))))))))))))).......))))).	3161	3188	1	-25.8	0	3.84488e-06	0.485	0	0	-8.32703	19	27	14	3UTR		0	0
hsa-miR-221-3p	NM_002745	MAPK1	AGCTACATTGTCTGCTGGGTTTC#GCAGACATTGTGGCA#.((((((.(((((((........#))))))).)))))).	4152	4167	1	-22.5	1	0.000172027	0.544	0	0	-6.34001	13	15	7	3UTR		0	0
hsa-miR-221-3p	NM_002764	PRPS1	AGCTACATTGTCTGCTGGGTTTC#AAATTCAGCAGAAGACCCGGCTTGCTCCAGTGTAGCTT#((((((((((...(((((((((.#.)))))))))......)))))))))).	1146	1184	1	-27	1	0.000720108	0.529	0	0	-11.3983	19	27	10	3UTR		0	0
hsa-miR-221-3p	NM_002776	KLK10	AGCTACATTGTCTGCTGGGTTTC#ATCCAGCCTGGACAAAAGAGCA#.(((...(((((((((((((...#)))))))..))))))...))).	2212	2234	1	-20.1	0	0.0044778	0.588	3.43953	1.6396	-11.357	16	22	7	3UTR		0	0
hsa-miR-221-3p	NM_002781	PSG5	AGCTACATTGTCTGCTGGGTTTC#GAAGACTGGCAGACAGTTGCTT#(((...((((((((((((..(((#)))..)))))))))))).))).	1167	1189	1	-21.5	0	0.000147151	0.618	0	0	-12.9896	18	22	12	3UTR		0	0
hsa-miR-221-3p	NM_002783	PSG7	AGCTACATTGTCTGCTGGGTTTC#CTCAGGAGGAAATGTGGCTC#(((((((((.(((.(((((....#))))).))).))))))))).	1821	1841	1	-21.9	1	5.09157e-05	0.559	0	0	-6.03692	17	20	9	3UTR		0	0
hsa-miR-221-3p	NM_002789	PSMA4	AGCTACATTGTCTGCTGGGTTTC#GACCCTAACAGCAGGCAAA#.......((((((((((((((..#)))))....))))))))).	3881	3900	1	-18.5	0	0.00349754	0.662	0	0	-17.1102	14	19	9	3UTR		0	0
hsa-miR-221-3p	NM_002799	PSMB7	AGCTACATTGTCTGCTGGGTTTC#GAGGCCCAGTAAGACACTCATGTGGCTA#(((((((((((((((((((((((#))))))))))).))))...)))))))).	899	927	1	-31.2	1	2.80455e-05	0.544	0	0	-3.93757	23	28	11	3UTR		0	0
hsa-miR-221-3p	NM_002826	QSOX1	AGCTACATTGTCTGCTGGGTTTC#GAAACCCCCATCTCTACTAAAATATTACACAGGCATTGTGGCA#.((((((.((((((..(((((((#)))))))......................)))))).)))))).	8143	8186	1	-23.8	1	0.000939875	0.529	0	0	-7.07546	19	43	7	3UTR		0	0
hsa-miR-221-3p	NM_002828	PTPN2	AGCTACATTGTCTGCTGGGTTTC#GAATCACTTGAACCCGGGAGGCAGAGGTTGCA#.((.((.((((((.((((((((.#.)))))))).))))))..)).)).	3231	3263	1	-24.6	0	1.99736e-05	0.412	0	0	-9.22587	18	24	8	3UTR		0	0
hsa-miR-221-3p	NM_002829	PTPN3	AGCTACATTGTCTGCTGGGTTTC#GAGACCGGACACCCACAGAGCTGTTGTCCTCCCAGCAACAAGATGGTGTGGTTA#(((((((((((((((((((....#.)))))))....)))))))))))).	3163	3217	1	-24.9	1	0.000296451	0.559	0	0	-3.93757	19	25	12	3UTR		1	0
hsa-miR-221-3p	NM_002843	PTPRJ	AGCTACATTGTCTGCTGGGTTTC#GGAATCGGGGGGATGGTGTGAGCA#.((((((((((((.((.((((((#)))))).)).))))))))).))).	7105	7129	1	-23.7	1	0.00158742	0.485	0	0	-4.65016	20	24	9	3UTR		0	0
hsa-miR-221-3p	NM_002855	NECTIN1	AGCTACATTGTCTGCTGGGTTTC#AGCCCAGCAGAGAGATGAGG#..((.((((.(((((((((((..#)))))))))))..)))))).	4725	4745	1	-23.4	0	0.00029327	0.456	0	0	-10.3185	17	20	11	3UTR		1	0
hsa-miR-221-3p	NM_002878	RAD51D	AGCTACATTGTCTGCTGGGTTTC#GAGCCCAGGAGGCAGAGGTTGCA#.((.((.((((((.((((((((.#)))))))).))))))..)).)).	3853	3876	1	-24.9	0	0.00039765	0.412	0.220616	0.131399	-9.22587	18	23	8	3UTR		0	0
hsa-miR-221-3p	NM_002884	RAP1A	AGCTACATTGTCTGCTGGGTTTC#GGACCCAGGGTGATACTACTTATGTAGTC#.((((((((((((.((((((((.#)))))))).).))))......))))))).	2108	2137	1	-20.9	1	4.33872e-05	0.618	0	0	-4.65016	20	29	8	3UTR		0	0
hsa-miR-221-3p	NM_002885	RAP1GAP	AGCTACATTGTCTGCTGGGTTTC#GAAACTGAGCAGATGAGGCC#.(((...(((((((((.((((((#)))))).)))))))))))).	2266	2286	1	-21.9	0	0.00114487	0.397	0	0	-11.357	18	20	12	3UTR		0	0
hsa-miR-221-3p	NM_002928	RGS16	AGCTACATTGTCTGCTGGGTTTC#ACCCAGGGCAGCCCCTTTGTGGCC#.((((((..(.(((((((((...#)))))..))))...)..)))))).	1999	2023	1	-20.1	1	0.000161465	0.456	0	0	-9.98812	16	24	6	3UTR		0	0
hsa-miR-221-3p	NM_002945	RPA1	AGCTACATTGTCTGCTGGGTTTC#GGAACCCAGGGGCAGTGC#.....((((((((.(((((((((#))))))))))))))))).	3887	3905	1	-23.7	0	0.00414279	0.338	0	0	-14.5224	17	18	17	3UTR		0	0
hsa-miR-221-3p	NM_002959	SORT1	AGCTACATTGTCTGCTGGGTTTC#AAACTCCCAGGCTTGATGTAGCA#.(((((((((((((..((((((.#)))))).)))))..)))))))).	5236	5259	1	-20.7	1	0.00116396	0.574	0	0	-4.76182	19	23	8	3UTR		0	0
hsa-miR-221-3p	NM_002960	S100A3	AGCTACATTGTCTGCTGGGTTTC#GAGGCTCAGCAGAGCGTGC#.....(((..(((((((((((((#)))))))))))))..))).	663	682	1	-23.3	0	2.40716e-06	0.382	0	0	-15.9645	16	19	13	3UTR		0	0
hsa-miR-221-3p	NM_002990	CCL22	AGCTACATTGTCTGCTGGGTTTC#GAACCCAGCCTGACAAA#.......(((((.(((((((((.#)))))))))..))))).	2635	2652	1	-20.5	0	0.061893	0.5	0.476239	-0.0538886	-18.3994	14	17	9	3UTR		0	0
hsa-miR-221-3p	NM_002997	SDC1	AGCTACATTGTCTGCTGGGTTTC#AGCCCAGTAGACCTTGTTACTT#((..(((..((((((((((((..#))))))))))))..)))..)).	1737	1759	1	-23.6	0	0.00409606	0.618	0.402413	0.484335	-11.8972	17	22	12	3UTR		0	0
hsa-miR-221-3p	NM_003012	SFRP1	AGCTACATTGTCTGCTGGGTTTC#GAGAGCCAGCAGCAAAAACTACATTTTGCAACTTGTTGGTGTGGA#..((((((((.(((((((.((((#)))).)))))))))........................)))))).	1599	1644	1	-21.7	1	0.00017137	0.603	-0.143073	-0.125105	-7.78178	19	45	9	3UTR		0	0
hsa-miR-221-3p	NM_003017	SRSF3	AGCTACATTGTCTGCTGGGTTTC#GCCCAGCGGAAGTGTGT#...((((((.((((((((((...#)))))))))))))))).	916	933	1	-22.8	0	0.000653391	0.676	1.12352	0.80674	-7.75705	16	17	16	3UTR		0	0
hsa-miR-221-3p	NM_003023	SH3BP2	AGCTACATTGTCTGCTGGGTTTC#GACCCAGCAGCATCAAGCC#.(((....((.((((((((((..#))))))))))))...))).	5817	5836	1	-22.1	0	0.00647039	0.368	-0.653802	-0.357598	-16.4954	15	19	12	3UTR		0	0
hsa-miR-221-3p	NM_003024	ITSN1	AGCTACATTGTCTGCTGGGTTTC#GAAAGGTCTCCCGGCAGGCTGTGGCA#.((((((..((((((((((....#.)))))))))))))))).	13173	13199	1	-27.3	1	1.37348e-05	0.485	0	0	-7.16335	16	18	16	3UTR		0	0
hsa-miR-221-3p	NM_003043	SLC6A6	AGCTACATTGTCTGCTGGGTTTC#GAGGCTCAGGGAGGCACTGTGAGCC#.((((((.(((((.(((((((((#)))))))))..))))).))).))).	4893	4918	1	-22.4	1	3.148e-06	0.529	0	0	-6.9638	20	25	9	3UTR		0	0
hsa-miR-221-3p	NM_003048	SLC9A2	AGCTACATTGTCTGCTGGGTTTC#GAGGCTCCAAGCAGACAAAGAAGAAAGTTTGTAGA#..(((((((((((((((((((((#))))).))).))))))))...........))))).	3731	3766	1	-23.3	1	0.004751	0.632	0.245634	0.150696	-4.957	21	35	8	3UTR		0	0
hsa-miR-221-3p	NM_003061	SLIT1	AGCTACATTGTCTGCTGGGTTTC#TCTAGCATGACTACTGTAGCTG#(((((((..((((((((((....#))))))).)))...))))))).	5566	5588	1	-21.5	1	0.00122218	0.529	4.56254	4.71312	-7.3076	17	22	7	3UTR		0	0
hsa-miR-221-3p	NM_003079	SMARCE1	AGCTACATTGTCTGCTGGGTTTC#AATGCAGTGACAGTGTGGA#..((((((((((.((((.(((..#))).)))))))))))))).	2465	2484	1	-20.9	1	1.26782e-05	0.618	-0.0375982	-0.44908	-6.24613	17	19	14	3UTR		0	0
hsa-miR-221-3p	NM_003099	SNX1	AGCTACATTGTCTGCTGGGTTTC#ACCCAGCCAGAGAATGTT#....(((((.((((((((((...#))))))).))).))))).	4859	4877	1	-21.7	0	0.00634953	0.559	-0.630302	0.0173251	-10.7891	15	18	7	3UTR		0	0
hsa-miR-221-3p	NM_003111	SP3	AGCTACATTGTCTGCTGGGTTTC#GAAACTCAGCAGAAATGGCGTTTGCAAAGGTACAGTGTGGTA#.((((((((((((((((((((((#)))))))))))))...................))))))))).	6275	6317	1	-28.5	1	0.0031491	0.5	0.436466	1.00939	-3.79332	22	42	13	3UTR		0	0
hsa-miR-221-3p	NM_003139	SRPRA	AGCTACATTGTCTGCTGGGTTTC#GCCTGGTAGACAAGTGCTA#(((.((.(((((((((((((...#)))))))))))))))))).	2830	2849	1	-22.9	0	0.00046736	0.559	4.77937	4.88997	-8.51328	18	19	18	3UTR		0	0
hsa-miR-221-3p	NM_003155	STC1	AGCTACATTGTCTGCTGGGTTTC#GAGCAATTGCAGCAGACCCAGCAGCAGCAGCA#.(((...(((.(((((((((((.#.)))))))))))))).))).	2898	2930	1	-24.1	0	0.00263199	0.426	3.63482	2.55689	-14.1818	17	20	14	3UTR		0	0
hsa-miR-221-3p	NM_003186	TAGLN	AGCTACATTGTCTGCTGGGTTTC#GAAGCCTACAGCCTTTCTCAGCCCAGGACAATGAGCTC#((((.(((((((..(((((((..#.)))))))))))))))))).	2718	2756	1	-23.7	0	0.000607234	0.485	0.851657	0.878649	-10.2026	18	20	18	3UTR		0	0
hsa-miR-221-3p	NM_003202	TCF7	AGCTACATTGTCTGCTGGGTTTC#GGAATCTCAGAGACAGGTGGCC#.(((((.((((((.(((((((((#)))))).)))))))))))))).	1574	1596	1	-22.2	0	0.000619028	0.397	0.73852	0.622742	-6.19385	20	22	14	3UTR		0	0
hsa-miR-221-3p	NM_003227	TFR2	AGCTACATTGTCTGCTGGGTTTC#GGAGCCCAGACCCCAGCACAGATATCCACACACCCCAGCCCTGCAGTGTAGCTG#(((((((((((..((((((....#.))))))...))))))))))).	2590	2644	1	-27.8	1	0.000150023	0.456	0.217511	0.945343	-8.57351	17	22	11	3UTR		0	0
hsa-miR-221-3p	NM_003249	THOP1	AGCTACATTGTCTGCTGGGTTTC#GGGCTCCAGCAGTGGGCTCAGAGGACAGTGTGGCA#.((((((((((((.((((((((.#.)))))))).)))))))))))).	4629	4664	1	-29.3	1	0.0152268	0.382	-0.583735	-0.440153	-4.65016	20	23	12	3UTR		0	0
hsa-miR-221-3p	NM_003253	TIAM1	AGCTACATTGTCTGCTGGGTTTC#CCCGGTGGGCGGTGTGTGTG#.((((((((((((((((((....#)))))))))))))))).)).	6307	6327	1	-24.3	1	3.68164e-06	0.412	2.16281	2.47644	-3.79332	18	20	16	3UTR	MIRT046873	0	0
hsa-miR-221-3p	NM_003274	TRAPPC10	AGCTACATTGTCTGCTGGGTTTC#CCCAGTGTAATGTAGCTT#((((((((((.(.((((((....#))))))))))))))))).	5778	5796	1	-21.9	1	0.000818891	0.485	-1.13259	-0.560693	-8.05148	17	18	17	3UTR		0	0
hsa-miR-221-3p	NM_003290	TPM4	AGCTACATTGTCTGCTGGGTTTC#CCCAGCAGCGTGTGGG#..(((((.((.((((((((....#))))))))))))))).	2222	2238	1	-22.3	0	7.21657e-07	0.529	0.654325	1.27887	-10.0954	15	16	15	3UTR		0	0
hsa-miR-221-3p	NM_003304	TRPC1	AGCTACATTGTCTGCTGGGTTTC#GAAGACCAGCAAATGTAGGCTG#(((((((((...((((((..(((#)))..))))))))))))).)).	3149	3171	1	-19.6	1	8.64522e-05	0.647	0.446644	0.372771	-11.3517	18	22	13	3UTR		0	0
hsa-miR-221-3p	NM_003344	UBE2H	AGCTACATTGTCTGCTGGGTTTC#GACCTGCTGGGGGAGGTTGTAGGAGTTTAGCAGATTTGAGTGTGGCTG#(((((((((((((((((((((((#.))))))))))))))...))))))))).	3330	3378	1	-24.6	1	0.00157159	0.5	0.624073	-0.0831727	-3.93757	23	28	14	3UTR		0	0
hsa-miR-221-3p	NM_003350	UBE2V2	AGCTACATTGTCTGCTGGGTTTC#GAAAGACAGCAGGGAACTGTAGCC#.((((((((.(((((((..((((#))))..))))))).)).)))))).	3659	3683	1	-24.7	1	5.04418e-05	0.574	-0.1042	0.00473693	-5.03583	19	24	7	3UTR		0	0
hsa-miR-221-3p	NM_003392	WNT5A	AGCTACATTGTCTGCTGGGTTTC#CCCAGCAGGGCTGCTAGCTT#(((((((...(((((((((....#)))))))))..)).))))).	1978	1998	1	-22.1	1	2.74372e-05	0.588	4.53257	3.39628	-8.55011	16	20	9	3UTR		0	0
hsa-miR-221-3p	NM_003403	YY1	AGCTACATTGTCTGCTGGGTTTC#AGGCCCAGCAGGTCCTGGCA#.((((.....((((((((((((.#))))))))))))...)))).	5255	5275	1	-22.1	0	5.37211e-05	0.441	-0.0180436	-0.482269	-11.8505	16	20	12	3UTR	MIRT046848	0	0
hsa-miR-221-3p	NM_003439	ZKSCAN1	AGCTACATTGTCTGCTGGGTTTC#AGCCTGGCAGGCAAGGCTA#((((...((((((((((((((..#)))))))))))))))))).	5067	5086	1	-24	0	0.000172833	0.544	0.698554	0.469022	-11.5013	18	19	18	3UTR		0	0
hsa-miR-221-3p	NM_003441	ZNF141	AGCTACATTGTCTGCTGGGTTTC#GAAGCCCTACACATGTGGCAGAATGTGGCA#.(((((((..(((((((((((((#))))))).........))))))))))))).	1933	1963	1	-25.3	1	0.00020788	0.544	-0.694968	-1.23526	-6.09222	20	30	13	3UTR		0	0
hsa-miR-221-3p	NM_003457	ZNF207	AGCTACATTGTCTGCTGGGTTTC#GAACCCGGGAGGCATAGCTT#(((((...(((((.((((((((.#)))))))).)))))))))).	4025	4045	1	-23.9	0	0.000547136	0.397	0	0	-10.5527	18	20	10	3UTR		0	0
hsa-miR-221-3p	NM_003458	BSN	AGCTACATTGTCTGCTGGGTTTC#GAGCCCTGTGCGGGGGAATGTGGCA#.((((((((.(((((.((((((.#))))))...)))))..)))))))).	13134	13159	1	-24.3	1	0.000945363	0.368	-0.0425939	0.724423	-5.26888	19	25	8	3UTR		0	0
hsa-miR-221-3p	NM_003468	FZD5	AGCTACATTGTCTGCTGGGTTTC#GGAACCCCAGAGCTAGGAAATGTAGTTG#(((((((((.(((((((((((((#)))))))...))).))).))))))))).	5925	5953	1	-23.2	1	0.000787397	0.574	6.23868	4.84283	-5.18008	22	28	9	3UTR		0	0
hsa-miR-221-3p	NM_003476	CSRP3	AGCTACATTGTCTGCTGGGTTTC#AAACTCAGAAATGACAATAAAGCGTGGCA#.(((((((((((..((((((((.#))))))))....)))))).....))))).	1232	1261	1	-19.9	1	0.0282302	0.639	1.08719	2.64827	-5.9393	19	29	8	3UTR		0	0
hsa-miR-221-3p	NM_003485	GPR68	AGCTACATTGTCTGCTGGGTTTC#GCCGCGGCTGCGATGTGGCC#.((((((((((..(((((((...#))).)))).)))))))))).	1596	1616	1	-23.6	1	2.40391e-07	0.324	2.03507	2.49648	-8.42926	17	20	10	3UTR		1	0
hsa-miR-221-3p	NM_003486	SLC7A5	AGCTACATTGTCTGCTGGGTTTC#CCTAGCTCACCAGGCCTGGCCTCTGGGCAGTGTGGCC#.(((((((((((((((((((((.#.)))))))))....)))))))))))).	2322	2359	1	-28.1	1	6.37089e-08	0.412	-0.758382	-0.775372	-3.79332	21	27	12	3UTR		0	0
hsa-miR-221-3p	NM_003559	PIP4K2B	AGCTACATTGTCTGCTGGGTTTC#GATACCCGGTAGACCCAGCA#.(((.....(((((((((((.((#)).)))))))))))..))).	1836	1856	1	-21.7	0	0.0169969	0.515	-0.184817	1.82453	-14.727	16	20	11	3UTR		0	0
hsa-miR-221-3p	NM_003582	DYRK3	AGCTACATTGTCTGCTGGGTTTC#AGCCAGCAGCAGTGTCAAGACAGCTG#((((((((((.(((((((.(...#).)))))))))))))......)))).	4968	4994	1	-22.4	1	6.79261e-05	0.529	0.145583	0.059364	-6.76235	18	26	13	3UTR	MIRT477807	0	0
hsa-miR-221-3p	NM_003593	FOXN1	AGCTACATTGTCTGCTGGGTTTC#GGCCCTGCGGGGTGTGGCC#.(((((((..(((((.(((((..#))))).)))))))))))).	3241	3260	1	-22.5	1	3.16615e-06	0.338	0	0	-6.32527	17	19	12	3UTR		0	0
hsa-miR-221-3p	NM_003595	TPST2	AGCTACATTGTCTGCTGGGTTTC#GAACCCAGGAGGCAGAGGTTGCA#.((.((.((((((.((((((((.#)))))))).))))))..)).)).	3965	3988	1	-24.9	0	0.000437565	0.485	0.17732	0.850499	-9.22587	18	23	8	3UTR		0	0
hsa-miR-221-3p	NM_003612	SEMA7A	AGCTACATTGTCTGCTGGGTTTC#AACCCAGTGGAGGATGCCAGGCC#.(((.((((.(((((((((((..#))))))))))).))))...))).	2159	2182	1	-24.8	0	5.52187e-05	0.353	2.25956	1.91404	-9.15487	18	23	11	3UTR		0	0
hsa-miR-221-3p	NM_003643	GCM1	AGCTACATTGTCTGCTGGGTTTC#GCCCGGCTGACAAGGCTT#((((...(((((.(((((((...#))))))).))))))))).	1986	2004	1	-21.7	0	0.000522621	0.559	0.947436	0.838456	-12.7904	16	18	9	3UTR		0	0
hsa-miR-221-3p	NM_003696	OR6A2	AGCTACATTGTCTGCTGGGTTTC#GGAACCATGTAGGCAAGGCA#.(((...((((((((..((((((#))))))..))))))))))).	1962	1982	1	-21	0	0.000741265	0.574	0	0	-11.5901	17	20	11	3UTR		0	0
hsa-miR-221-3p	NM_003728	UNC5C	AGCTACATTGTCTGCTGGGTTTC#ACTCTAGAGGCAGTGTGGTTG#(((((((((((((.((((((...#)).))))))))))))))))).	4069	4090	1	-21.9	1	8.12429e-05	0.5	0	0	-4.79441	19	21	17	3UTR		0	0
hsa-miR-221-3p	NM_003730	RNASET2	AGCTACATTGTCTGCTGGGTTTC#AGATGCGGACAATGTGGCA#.((((((((((((((........#.)))))))))))))).	5117	5136	1	-25	1	0.00109873	0.426	0	0	-4.02637	14	16	14	3UTR		0	0
hsa-miR-221-3p	NM_003759	SLC4A4	AGCTACATTGTCTGCTGGGTTTC#GAAGCCCAGTGGCACCAAATGGCTG#(((((....((((((((((((((#)))))))))))).))....))))).	6946	6971	1	-24	0	0.000290771	0.515	0.330637	0.311453	-10.7522	19	25	12	3UTR		1	1
hsa-miR-221-3p	NM_003761	VAMP8	AGCTACATTGTCTGCTGGGTTTC#GAGACCTAGAGGGCCCAGCATGTGGCTG#((((((((.((((.(((((((((#))))))))).)))).....)))))))).	603	631	1	-25.1	1	1.09534e-08	0.426	0.741392	0.802934	-5.8508	21	28	9	3UTR		0	0
hsa-miR-221-3p	NM_003805	CRADD	AGCTACATTGTCTGCTGGGTTTC#GAAAGGCCAGATTACTCAGCAGATCTCCCATGTTGGCTC#((((((((.(((((((((((...#.))))))))))).....)))).)))).	861	900	1	-21.3	1	0.0101054	0.603	0.0936454	0.136713	-4.99396	19	27	11	3UTR		0	0
hsa-miR-221-3p	NM_003812	ADAM23	AGCTACATTGTCTGCTGGGTTTC#GAGATTCAGTAGTCATTGTATGCA#.((((((.((.((((((((((((#)))))))))))).)).)))).)).	6271	6295	1	-23.7	1	0.00107774	0.662	2.13112	2.19212	-8.93173	20	24	12	3UTR		0	0
hsa-miR-221-3p	NM_003831	RIOK3	AGCTACATTGTCTGCTGGGTTTC#GAACCCGGGAGGCAGAGGTTGCA#.((.((.((((((.((((((((.#)))))))).))))))..)).)).	2862	2885	1	-24.2	0	8.70377e-06	0.412	0.0203527	-0.0121598	-9.22587	18	23	8	3UTR		0	0
hsa-miR-221-3p	NM_003851	CREG1	AGCTACATTGTCTGCTGGGTTTC#GAGATCCAGCAAACAGGTTCTG#((..((.((((.(((((((((((#))))))))))).)))))).)).	1862	1884	1	-19.7	0	0.000697263	0.721	0.196095	0.296884	-13.4176	19	22	11	3UTR		0	0
hsa-miR-221-3p	NM_003900	SQSTM1	AGCTACATTGTCTGCTGGGTTTC#GGACAAATTGCGCCCATTTAGAGGATGTGGCTG#(((((((((.((((.(((((...#.)))))..)))).))))))))).	2484	2517	1	-25.2	1	0.00257173	0.456	0	0	-5.91553	18	23	9	3UTR		0	0
hsa-miR-221-3p	NM_003901	SGPL1	AGCTACATTGTCTGCTGGGTTTC#GAATGAGGTCCAGGAACCCAGAGCCACCCAGCAGACACCACTGTGGCTT#(((((((.((((((((((((...#.))))))))))))....))))))).	4135	4184	1	-30.6	1	9.71064e-05	0.397	0.11874	0.00456346	-6.25121	19	25	12	3UTR		0	0
hsa-miR-221-3p	NM_003945	ATP6V0E1	AGCTACATTGTCTGCTGGGTTTC#AAACCCTGCCATGTAGCTT#(((((((.((...((.((((((.#)))))).))))))))))).	969	988	1	-18.1	1	0.0292743	0.588	0.253558	0.576958	-13.945	17	19	11	3UTR		0	0
hsa-miR-221-3p	NM_003979	GPRC5A	AGCTACATTGTCTGCTGGGTTTC#GAAACTGAGTGACATGTAAAAATGTGTAGCTA#((((((((((((.(((.((((((#)))))).))))))).........)))))))).	2797	2829	1	-23	1	0.0332686	0.603	0.138388	-0.146823	-5.22671	21	32	8	3UTR		0	0
hsa-miR-221-3p	NM_003983	SLC7A6	AGCTACATTGTCTGCTGGGTTTC#GAAACCTAACAGGATGTCAGCAGGGCAGTTAACTCTGGACTCAGAGCCCTCAAGGGCATGTGGCA#.((((((.(((((...((((((.#.))))))....))))))))))).	5620	5685	1	-23.1	1	6.15043e-05	0.485	0.25191	-0.0141719	-7.9323	17	23	11	3UTR		0	0
hsa-miR-221-3p	NM_004001	FCGR2B	AGCTACATTGTCTGCTGGGTTTC#GAAAGCCACAGACAATATGGTC#.((((.((((((((.(((.((((#)))).))))))))))).)))).	1185	1207	1	-22.1	0	0.00223803	0.5	0	0	-6.42973	19	22	11	3UTR		0	0
hsa-miR-221-3p	NM_004027	INPP4A	AGCTACATTGTCTGCTGGGTTTC#AAGCTGAGCAGACAGGGTAGG#..((((.(((((((((.(((((.#))))).))))))))).)))).	8830	8851	1	-25.1	0	0.0104927	0.529	0	0	-6.50069	18	21	9	3UTR		0	0
hsa-miR-221-3p	NM_004050	BCL2L2	AGCTACATTGTCTGCTGGGTTTC#GGAGCTGAGCAGGCTGGGCA#.(((.....(((((((.((((((#)))))).)))))))..))).	2568	2588	1	-22.1	0	1.49561e-05	0.397	1.15606	1.44078	-14.727	16	20	7	3UTR		0	0
hsa-miR-221-3p	NM_004091	E2F2	AGCTACATTGTCTGCTGGGTTTC#CCCAGCATCCAGGTGTTGTGTGGCTT#((((((((((..(((((((....#)))))))..))......)))))))).	4836	4862	1	-21.7	1	0.000707655	0.441	1.01098	0.839998	-10.1092	17	26	8	3UTR		1	0
hsa-miR-221-3p	NM_004097	EMX1	AGCTACATTGTCTGCTGGGTTTC#GCCTAGAGACTCTGGTGGCTT#((((((...((((.((((((...#))))))))))....)))))).	1927	1948	1	-20.9	0	0.00601628	0.441	0	0	-9.70813	16	21	10	3UTR		0	0
hsa-miR-221-3p	NM_004117	FKBP5	AGCTACATTGTCTGCTGGGTTTC#ACCCTTCAGCAATGATAATGAGCA#.(((.(((((((((((((((...#))))...))))..)))))))))).	2211	2235	1	-19.4	0	0.0101975	0.618	0	0	-7.91236	18	24	10	3UTR		0	0
hsa-miR-221-3p	NM_004120	GBP2	AGCTACATTGTCTGCTGGGTTTC#GAGGCTGCATGATCTGTGGGCACTAGCAGAGAAAGTGGTTG#((((((.((.((((((((((((.#.)))).)))))))).)).)))))).	2643	2684	1	-23.1	0	8.61443e-05	0.515	0	0	-6.72377	20	25	8	3UTR		0	0
hsa-miR-221-3p	NM_004133	HNF4G	AGCTACATTGTCTGCTGGGTTTC#GAAAACGAAAACAAAGTAAAATGACTGGCTTAGCAGATTCTTTGAAATGTAGCA#.((((((((((((((((((((..#.)))))))))))).......)))))))).	2778	2832	1	-25	1	0.00234661	0.588	0.269592	-0.207933	-3.79332	20	29	12	3UTR		0	0
hsa-miR-221-3p	NM_004136	IREB2	AGCTACATTGTCTGCTGGGTTTC#GCCCAGCTAATTTTTGTAGTTT#(((((((..((..(((((((...#)))))))..))...))))))).	4880	4902	1	-19.9	1	0.0214628	0.529	-0.264409	0.0662203	-11.9435	16	22	7	3UTR		0	0
hsa-miR-221-3p	NM_004139	LBP	AGCTACATTGTCTGCTGGGTTTC#GCCTAGCAGAGTGCTGGCA#.(((((((..((((((((((...#))))))))))))).)))).	1769	1788	1	-22.6	1	1.78842e-07	0.574	0.143583	0.230071	-6.09222	17	19	13	3UTR		0	0
hsa-miR-221-3p	NM_004147	DRG1	AGCTACATTGTCTGCTGGGTTTC#AGATCTGGTAGGCTGGTCAGCTA#((((((...(((((((((((((.#)))))))))))))..)).)))).	1370	1393	1	-19.5	0	0.000294803	0.559	0.960663	0.5867	-8.85129	19	23	13	3UTR		0	0
hsa-miR-221-3p	NM_004164	RBP2	AGCTACATTGTCTGCTGGGTTTC#GAAACCTAGCATTAAATGG#.....((((...(((((((((((#)))))))))))...)))).	638	657	1	-19.6	0	0.0102233	0.691	0.765995	1.38275	-21.0797	15	19	11	3UTR		0	1
hsa-miR-221-3p	NM_004198	CHRNA6	AGCTACATTGTCTGCTGGGTTTC#GGACTTTCTTGCACATTAGGAAGCAGAATATCCTCCAGTGTAGCA#.(((((((((((((((.......#.))))))........))))))))).	1975	2020	1	-20.1	1	2.82406e-06	0.544	0.964461	0.864037	-3.79332	15	25	9	3UTR		0	0
hsa-miR-221-3p	NM_004207	SLC16A3	AGCTACATTGTCTGCTGGGTTTC#GCCTGGCTGGCAGTGTGCG#.((.((((((((.(((((((...#))))))).)))))))))).	2314	2333	1	-23.7	0	9.15736e-07	0.368	-0.480913	-0.567826	-8.11448	17	19	10	3UTR		0	0
hsa-miR-221-3p	NM_004267	CHST2	AGCTACATTGTCTGCTGGGTTTC#GGAACAAGAGACAGTGTAGTTG#(((((((((((((.((..(((((#))))).))))))))))))))).	4085	4107	1	-22.4	1	0.0174955	0.632	0.936558	0.244717	-4.79441	20	22	15	3UTR		0	0
hsa-miR-221-3p	NM_004296	RGS6	AGCTACATTGTCTGCTGGGTTTC#AGACCCAGGGGCCATAAAGTAGCAAAGTAGCA#.(((((.((((((.((((((((.#)))))))).))..........)))).))))).	5234	5266	1	-23.3	0	0.0611536	0.5	0.180693	1.91829	-6.19385	19	32	8	3UTR		0	1
hsa-miR-221-3p	NM_004308	ARHGAP1	AGCTACATTGTCTGCTGGGTTTC#CCCAGCAGCGCAGTCTGGG#..(((.(((((((((((((....#)))))))).))))).))).	1969	1988	1	-21.8	0	1.12837e-07	0.368	0.596741	2.67669	-6.85796	16	19	8	3UTR		0	0
hsa-miR-221-3p	NM_004393	DAG1	AGCTACATTGTCTGCTGGGTTTC#GGGACTCCAAGAGGCAGTGGTGGCTG#(((((((((((((..((((((((#))))).)))..)))))))).))))).	3821	3847	1	-24.7	1	0.000247292	0.426	1.10386	1.30932	-5.52986	21	26	8	3UTR		0	0
hsa-miR-221-3p	NM_004453	ETFDH	AGCTACATTGTCTGCTGGGTTTC#GAACCCGGGAGGCAGAGGATGCA#.((..(.((((((.((((((((.#)))))))).)))))).)...)).	2938	2961	1	-23.4	0	6.8929e-05	0.382	0.307075	-0.0186097	-13.3449	17	23	8	3UTR		0	0
hsa-miR-221-3p	NM_004479	FUT7	AGCTACATTGTCTGCTGGGTTTC#GGGGCCCAGGAGACCACGGGGAGCA#.(((.(...((((.(((((((((#))))))))).))))....)..))).	1578	1603	1	-23	0	0.000229085	0.324	0	0	-13.6829	17	25	9	3UTR		0	0
hsa-miR-221-3p	NM_004491	ARHGAP35	AGCTACATTGTCTGCTGGGTTTC#GGACCCATTTGAGGACTGAACTAGGCAGGCAATGGCTC#(((..(((((((((((.(((((.#.))))).)))))))))))))).	5113	5151	1	-22.7	0	0.000513701	0.412	0	0	-11.0886	19	22	14	3UTR		0	0
hsa-miR-221-3p	NM_004514	FOXK2	AGCTACATTGTCTGCTGGGTTTC#GGACCCACCAGGCAGCGGAGACATGTGGA#..((((((((((((.(((((((.#))))))).))))))........)))))).	2522	2551	1	-21.4	1	0.00482224	0.485	1.382	1.25545	-5.69245	19	29	7	3UTR		0	0
hsa-miR-221-3p	NM_004536	NAIP	AGCTACATTGTCTGCTGGGTTTC#GAACCCGGGAGGCAGAGGTTGCA#.((.((.((((((.((((((((.#)))))))).))))))..)).)).	6335	6358	1	-24.2	0	1.41416e-06	0.412	0.0410176	0.095693	-9.22587	18	23	8	3UTR	MIRT005295	0	0
hsa-miR-221-3p	NM_004549	NDUFC2	AGCTACATTGTCTGCTGGGTTTC#GGACTCAGGAGCTAATACTGTCTACAGTGGAGCTT#((((.((((((((.((((((((.#)))))))).))............)))))).)))).	1166	1201	1	-19.6	0	0.000458276	0.574	-0.165042	0.283723	-8.91345	20	35	8	3UTR		0	0
hsa-miR-221-3p	NM_004663	RAB11A	AGCTACATTGTCTGCTGGGTTTC#CCAAGCGGTAGATTATGTGGCA#.(((((((.((((((((((....#))...)))))))).))))))).	1535	1557	1	-21	1	0.00415225	0.691	1.0901	0.810905	-4.84971	17	22	8	3UTR		0	0
hsa-miR-221-3p	NM_004703	RABEP1	AGCTACATTGTCTGCTGGGTTTC#GAGCTCATCAGTAACAGTATTCAGTTAGCAGACAGAAGTGTAGTA#.(((((((((((((((((.(...#.).))))))))))...))))))).	3197	3242	1	-22.5	1	0.00465648	0.735	1.93466	1.98714	-3.79332	18	24	10	3UTR		0	0
hsa-miR-221-3p	NM_004726	REPS2	AGCTACATTGTCTGCTGGGTTTC#ATCCAGCAGACATCAAAGCA#.(((....((((((((((((...#))))))))))))....))).	5183	5203	1	-24.1	0	0.180945	0.632	0.403069	0.141868	-13.6706	15	20	12	3UTR		0	0
hsa-miR-221-3p	NM_004734	DCLK1	AGCTACATTGTCTGCTGGGTTTC#AGGCCCATCAGATATTGTTGAAAGAAAGCA#.((((((.((((((.(((((((.#))))))).)))))).)))........))).	5841	5871	1	-20	1	0.00191145	0.632	3.80635	2.4965	-6.84241	19	30	7	3UTR		0	0
hsa-miR-221-3p	NM_004752	GCM2	AGCTACATTGTCTGCTGGGTTTC#AATCCAGGGGACATAATAGCA#.((((...(((((.(((((((..#))))))).)))))...)))).	1774	1795	1	-22.5	0	0.0573552	0.529	0	0	-10.4084	16	21	7	3UTR		0	0
hsa-miR-221-3p	NM_004755	RPS6KA5	AGCTACATTGTCTGCTGGGTTTC#GCCTTGTGGACAATGTGGG#..(((((((((((((.((((...#)))).))))))))))))).	2980	2999	1	-24.1	1	0.000558723	0.603	0	0	-5.19005	17	19	13	3UTR		0	0
hsa-miR-221-3p	NM_004767	GPR37L1	AGCTACATTGTCTGCTGGGTTTC#GAATCCAGCAGAGGAGCGAGGGCA#.(((...((.((((((((((((.#)))))))))))).)).....))).	5738	5762	1	-24	0	0.0006341	0.397	-0.940054	-0.676684	-12.5995	17	24	12	3UTR		0	0
hsa-miR-221-3p	NM_004780	TCEAL1	AGCTACATTGTCTGCTGGGTTTC#GACAATGTGGCA#.(((((((((((...........#))))))))))).	1156	1168	1	-18.1	1	0.025278	0.691	0.825636	0.588017	-6.90779	11	12	11	3UTR	MIRT005789	0	0
hsa-miR-221-3p	NM_004784	NDST3	AGCTACATTGTCTGCTGGGTTTC#GAAACAAGAAGCAAAATAAACATCACAATGTAGCA#.((((((((((.((((..(((((#)))))....))))...........)))))))))).	3305	3340	1	-19.6	1	0.0853203	0.691	0.740726	0.921378	-7.14013	19	35	10	3UTR		1	1
hsa-miR-221-3p	NM_004800	TM9SF2	AGCTACATTGTCTGCTGGGTTTC#CCAGGGGAATGTGGCTT#((((((((..(((.((((.....#)))).))))))))))).	2590	2607	1	-20.4	1	0.00210913	0.632	1.77915	2.21965	-7.09331	15	17	11	3UTR		0	0
hsa-miR-221-3p	NM_004818	DDX23	AGCTACATTGTCTGCTGGGTTTC#GAGACCTGGCACCATGAGGATTACAGACAGTGG#.....((((((((((((((((((#)))))))))))..............))))))).	2961	2994	1	-21.7	0	0.000582622	0.5	3.70995	2.92619	-13.6656	18	33	11	3UTR		0	0
hsa-miR-221-3p	NM_004820	CYP7B1	AGCTACATTGTCTGCTGGGTTTC#ACCCAGTGATGGACACTGTCAGCA#.((((((.((((((((((((...#)))))))...))))).))).))).	4043	4067	1	-22.5	1	4.1135e-06	0.544	0.117923	0.119464	-6.10696	18	24	7	3UTR		1	0
hsa-miR-221-3p	NM_004857	AKAP5	AGCTACATTGTCTGCTGGGTTTC#AACTCAAAAAATACATTGCATTTTCCCAATTTCAGCAGATAGTGTGCA#.((.(((((((((((((((....#.))))))))))))))))).	2178	2226	1	-24.1	0	0.000449087	0.676	0.60333	0.570191	-6.82535	17	19	17	3UTR		1	1
hsa-miR-221-3p	NM_004863	SPTLC2	AGCTACATTGTCTGCTGGGTTTC#GAACCCAGGAGGCGGAGGTTGCA#.((.((.((((((.((((((((.#)))))))).))))))..)).)).	3459	3482	1	-24.1	0	2.03776e-05	0.426	-0.078437	-0.0864498	-9.22587	18	23	8	3UTR		0	0
hsa-miR-221-3p	NM_004865	TBPL1	AGCTACATTGTCTGCTGGGTTTC#GAAACAGTGTCTCTGGCTCACCCAGGAGCCCTGATGTGGTA#.(((((((((.((.((((((...#.)))))).))...))))))))).	2028	2069	1	-22	1	0.000115383	0.471	-0.140639	0.0985197	-7.47494	17	23	9	3UTR		0	0
hsa-miR-221-3p	NM_004873	BAG5	AGCTACATTGTCTGCTGGGTTTC#GCCTCAGCCACCTGAGTAGCTGGGAGTACAGGCATGTGGCA#.((((((.((((((((.((((..#.)))).))....)))))))))))).	3515	3556	1	-20.2	1	0.000179546	0.529	3.56217	2.87893	-6.10696	18	25	12	3UTR		0	0
hsa-miR-221-3p	NM_004887	CXCL14	AGCTACATTGTCTGCTGGGTTTC#GAGCTTTATAAGCGCCCGGGAGGAACAATGAGCTT#((((.((((((((.((((((...#.)))))).))..)))))))))).	857	892	1	-23	0	0.0101924	0.515	0.728553	1.74272	-8.91345	18	23	10	3UTR		0	0
hsa-miR-221-3p	NM_004905	PRDX6	AGCTACATTGTCTGCTGGGTTTC#CCTAGTAGATAAGTGAAGAGCA#.(((.((((((((((((((....#)))))))))))).))...))).	1341	1363	1	-19.7	0	0.00936451	0.691	0.120627	0.18803	-7.91236	17	22	12	3UTR		0	0
hsa-miR-221-3p	NM_004914	RAB36	AGCTACATTGTCTGCTGGGTTTC#CCCAGCAGACAGATTGCA#.((....((((((((((((....#))))))))))))...)).	4570	4588	1	-24.3	0	0.0012546	0.5	0.268405	0.0710995	-14.389	14	18	12	3UTR		0	0
hsa-miR-221-3p	NM_004923	TESMIN	AGCTACATTGTCTGCTGGGTTTC#GAGACGCAGGCAATGGGGCC#.(((.((((((((((...(((((#))))))))))))))).))).	2254	2274	1	-22.3	0	3.00665e-07	0.353	0.776471	0.0383294	-8.14541	18	20	15	3UTR		0	0
hsa-miR-221-3p	NM_004927	MRPL49	AGCTACATTGTCTGCTGGGTTTC#CCCAAGGATAGTGCTGGCTT#(((((((((((((..((((....#)))).)))))))).))))).	1807	1827	1	-20.2	1	3.78177e-05	0.471	-0.0818509	-0.116773	-5.52986	17	20	8	3UTR		0	0
hsa-miR-221-3p	NM_004931	CD8B	AGCTACATTGTCTGCTGGGTTTC#GGCCGCAGCAGAATGAGGTGTGGTG#.(((((((..(((((((((((..#)))).))))))).....))))))).	2122	2147	1	-22.3	1	0.00423374	0.412	0.20548	0.0241517	-6.09222	18	25	7	3UTR		0	0
hsa-miR-221-3p	NM_004987	LIMS1	AGCTACATTGTCTGCTGGGTTTC#GAACCCAGGAGGCGGAGCTT#((((...((((((.((((((((.#)))))))).)))))))))).	3797	3817	1	-23.1	0	4.22592e-05	0.426	0	0	-12.3581	18	20	10	3UTR	MIRT024188	0	0
hsa-miR-221-3p	NM_004995	MMP14	AGCTACATTGTCTGCTGGGTTTC#GAGACCCAGTGGAGGGAGCA#.(((...((.(((((((((((((#))))))))))))).))))).	3372	3392	1	-23.9	0	0.000175607	0.324	0.337242	0.697731	-12.5995	18	20	13	3UTR		0	0
hsa-miR-221-3p	NM_005006	NDUFS1	AGCTACATTGTCTGCTGGGTTTC#AAACCCAGGAGACGGAGGTTGCA#.((.((.((((((.((((((((.#)))))))).))))))..)).)).	6968	6991	1	-24.3	0	8.23725e-05	0.471	0	0	-9.22587	18	23	8	3UTR	MIRT046974	0	0
hsa-miR-221-3p	NM_005015	OXA1L	AGCTACATTGTCTGCTGGGTTTC#GAACCCAGGAGGCAGAGCTT#((((...((((((.((((((((.#)))))))).)))))))))).	2171	2191	1	-23.9	0	0.00128227	0.397	0	0	-12.3581	18	20	10	3UTR		1	0
hsa-miR-221-3p	NM_005017	PCYT1A	AGCTACATTGTCTGCTGGGTTTC#GAACCCAGGAGGCGGAGGTTGCA#.((.((.((((((.((((((((.#)))))))).))))))..)).)).	3212	3235	1	-24.1	0	6.76686e-05	0.382	0.133748	0.297649	-9.22587	18	23	8	3UTR		0	0
hsa-miR-221-3p	NM_005036	PPARA	AGCTACATTGTCTGCTGGGTTTC#GACACTCAGCAGCGATGGTGAGCA#.(((.(((((.(((((((((.((#)).))))))))))))))...))).	4441	4465	1	-23.5	0	0.000186375	0.471	0	0	-10.7371	19	24	14	3UTR		0	0
hsa-miR-221-3p	NM_005063	SCD	AGCTACATTGTCTGCTGGGTTTC#AGCCTAGGGCAGACAATAGTAT#...((((((((((((((((((..#)))))..)))))))))).))).	3608	3630	1	-20.7	0	0.00208827	0.618	0.446688	0.254581	-6.51454	18	22	10	3UTR		0	0
hsa-miR-221-3p	NM_005082	TRIM25	AGCTACATTGTCTGCTGGGTTTC#AGACCCAGGTACTGGGGACTGTCTCAGTCCGTGTGGCA#.(((((((.(.(((((((((((.#))))))))................))).).))))))).	4400	4438	1	-22.3	1	0.00039653	0.544	-0.297907	0.00740105	-7.67449	19	38	8	3UTR		0	0
hsa-miR-221-3p	NM_005087	FXR1	AGCTACATTGTCTGCTGGGTTTC#GAATTTATACAGCTTTCAGTGTGGCA#.(((((((((...((((.((...#.)).))))...))))))))).	6874	6900	1	-19.3	1	0.00013334	0.706	-0.103669	-0.36046	-11.254	15	21	9	3UTR		0	0
hsa-miR-221-3p	NM_005099	ADAMTS4	AGCTACATTGTCTGCTGGGTTTC#AAACCCAGCAGAATGCCTAGA#..(((.....((((((((((((.#)))))))))))).....))).	4977	4998	1	-21.9	0	0.030291	0.632	0.1972	-0.0667039	-13.0142	15	21	12	3UTR		0	0
hsa-miR-221-3p	NM_005105	RBM8A	AGCTACATTGTCTGCTGGGTTTC#AGCTCAGTGGACCGTGTGGA#..((((((.((((((((((((..#)))))))))))).)))))).	2280	2300	1	-24.2	1	6.85191e-05	0.412	0.410281	0.132774	-6.01339	18	20	12	3UTR		0	0
hsa-miR-221-3p	NM_005109	OXSR1	AGCTACATTGTCTGCTGGGTTTC#GAACCCAGCAACAAACCTCCCGGCTA#((((...((((.((((((((((.#)))))))))))))).......)))).	2011	2037	1	-20	0	0.00768763	0.529	3.85088	2.04638	-14.8481	18	26	14	3UTR		0	0
hsa-miR-221-3p	NM_005114	HS3ST1	AGCTACATTGTCTGCTGGGTTTC#CCCAGCTATGTGACTGTAGCTA#(((((((..(((.((((((....#)))))).....)))))))))).	6305	6327	1	-21	1	0.0069312	0.544	2.9864	4.15584	-8.59673	16	22	10	3UTR		0	0
hsa-miR-221-3p	NM_005118	TNFSF15	AGCTACATTGTCTGCTGGGTTTC#GGCCAGTGCCAGACAGTAGCTA#((((((..((((((((((.(...#).))))...)))))))))))).	6018	6040	1	-20.1	0	0.0251483	0.544	1.30199	1.0979	-7.7949	17	22	12	3UTR		0	0
hsa-miR-221-3p	NM_005122	NR1I3	AGCTACATTGTCTGCTGGGTTTC#GGAGCCCAGTGGTTGCAATGA#.....((((((((((((((((((#))))))))))))..)))))).	1337	1358	1	-23.4	0	3.25436e-05	0.5	0.163595	-0.379441	-13.6656	18	21	12	3UTR		0	0
hsa-miR-221-3p	NM_005141	FGB	AGCTACATTGTCTGCTGGGTTTC#TCCAGTGGCAGTGGGCTG#((((.(((((((.((((((....#))))))))))))))))).	3228	3246	1	-20.8	0	1.47058e-06	0.529	0.074316	-0.0671975	-9.34574	17	18	17	3UTR		0	0
hsa-miR-221-3p	NM_005160	GRK3	AGCTACATTGTCTGCTGGGTTTC#GAACCCGGGAGGCAGAGCTT#((((...((((((.((((((((.#)))))))).)))))))))).	5850	5870	1	-23.2	0	0.00164834	0.397	0	0	-12.3581	18	20	10	3UTR		0	0
hsa-miR-221-3p	NM_005184	CALM3	AGCTACATTGTCTGCTGGGTTTC#GAGACCCAGCCAAGAGCTGAGGGTAAGGGCAGGTAGG#..((((.((((((((((((((((#))))))))))................)))))))))).	2018	2055	1	-24.8	0	0.00172289	0.426	1.24413	0.942752	-6.50069	20	37	10	3UTR		0	0
hsa-miR-221-3p	NM_005189	CBX2	AGCTACATTGTCTGCTGGGTTTC#GAGTCCGCCAGCAGGCATGGGGCTA#((((.((.((((((((((.....#.)))))))))))).)))).	3326	3351	1	-24.5	0	4.77857e-05	0.412	-0.632339	-0.623506	-10.3702	16	19	12	3UTR		0	0
hsa-miR-221-3p	NM_005191	CD80	AGCTACATTGTCTGCTGGGTTTC#ATTCTACAGCAGATACTTTGTCAGCA#.((((((.(((((((((......#.)))))))))...))).))).	2670	2696	1	-19.2	1	0.000418623	0.632	0.062507	0.273143	-6.10696	15	21	9	3UTR		0	0
hsa-miR-221-3p	NM_005207	CRKL	AGCTACATTGTCTGCTGGGTTTC#AAGCCTCAGCTCATAGTGAACACAGCAGACCTAGAAATGTAGCA#.((((((((((((((((.((((.#.)))).)))))))).....)))))))).	3151	3195	1	-26.3	1	0.0254039	0.559	0.0198973	-0.031227	-3.79332	20	28	8	3UTR		1	1
hsa-miR-221-3p	NM_005230	ELK3	AGCTACATTGTCTGCTGGGTTTC#CCAGTGGGCAATATGAAAGCA#.(((..((((((((((((.....#)))))))))))).....))).	2058	2079	1	-18.8	0	0.000393615	0.706	1.7119	2.10075	-9.81332	15	21	12	3UTR		0	0
hsa-miR-221-3p	NM_005234	NR2F6	AGCTACATTGTCTGCTGGGTTTC#GGGGCTGCTCCAGTGGGCAGGGGTAGCTA#((((((.(((((((((((((...#.)).)))))))))))..)))))).	2261	2290	1	-25.8	0	0.00363914	0.324	0	0	-5.48126	19	24	11	3UTR		0	0
hsa-miR-221-3p	NM_005235	ERBB4	AGCTACATTGTCTGCTGGGTTTC#ACCTGGCAGATACTCAGAAATGTAGTTT#((((((((((((((((((((...#)))))))))))).......)))))))).	5252	5280	1	-23.2	1	0.000255867	0.647	0	0	-3.93757	20	28	12	3UTR	MIRT053704	1	1
hsa-miR-221-3p	NM_005242	F2RL1	AGCTACATTGTCTGCTGGGTTTC#GAAACCCAGTAACTTGCAAAAAGTAGACTT#((((((.((((.(((((((((((#)))))))))))....))))...)))).)).	1614	1644	1	-20.8	0	0.0110003	0.588	-0.0565358	0.0711932	-8.82806	21	30	11	3UTR		0	0
hsa-miR-221-3p	NM_005262	GFER	AGCTACATTGTCTGCTGGGTTTC#GGAGCCAGGGGATGGCATGGAGTGATGTGGCTT#(((((((((((((.((((.(((.#))).)))).))))..........))))))))).	1582	1615	1	-22.5	1	0.00117687	0.397	0.00534413	-0.0610731	-4.79441	20	33	9	3UTR		0	0
hsa-miR-221-3p	NM_005308	GRK5	AGCTACATTGTCTGCTGGGTTTC#AGCCTGGTGGGCGATGGGCC#.(((.((((((((((((((((..#))))))))))))))))))).	2949	2969	1	-24.2	0	1.38507e-05	0.412	0	0	-7.91236	19	20	19	3UTR		0	0
hsa-miR-221-3p	NM_005313	PDIA3	AGCTACATTGTCTGCTGGGTTTC#GCCCTGTCAAGGGTGTGGCA#.((((((((.(..((.((((...#)))).))..).)))))))).	2380	2400	1	-19.3	1	4.75479e-06	0.5	0	0	-9.90481	15	20	8	3UTR		0	0
hsa-miR-221-3p	NM_005315	GSC2	AGCTACATTGTCTGCTGGGTTTC#AGGCCCTGCAGGGAATGGGGCC#.(((.((((.(((((.((((((.#)))))).))))).)))).))).	1765	1787	1	-24.5	0	1.73286e-07	0.471	0	0	-9.38792	18	22	6	3UTR		0	0
hsa-miR-221-3p	NM_005318	H1-0	AGCTACATTGTCTGCTGGGTTTC#CCCAGTCAGCTAGGATGTAGCC#.((((((((.(((((((((....#))))).)))..).)))))))).	1575	1597	1	-23	1	6.95833e-05	0.515	0.0705439	0.0764053	-5.03583	17	22	8	3UTR		0	0
hsa-miR-221-3p	NM_005324	H3-3B	AGCTACATTGTCTGCTGGGTTTC#GAAGCCCACAGGTGTAGA#..((((((...(((.((((((((#))))))))))))))))).	1945	1963	1	-20.3	1	0.0083573	0.529	2.95099	3.18758	-10.8161	17	18	17	3UTR		0	0
hsa-miR-221-3p	NM_005461	MAFB	AGCTACATTGTCTGCTGGGTTTC#GAGAGGGACTCTGGCGTCCCGGCAGGCGAGAGGCG#.(((...((((((((((((....#.))))))))))))..))).	1792	1827	1	-25	0	1.46655e-05	0.368	0.586057	0.751644	-11.357	15	19	12	3UTR		0	0
hsa-miR-221-3p	NM_005472	KCNE3	AGCTACATTGTCTGCTGGGTTTC#GAAACAGCTGAGTATCGTAGTTTCATATATGGTTCCAGCTAATACATGCAATGTGGCTG#(((((((((((..((((((....#.))))))........))))))))))).	2452	2511	1	-22.5	1	0.00082536	0.618	3.37105	3.20211	-8.57351	17	27	11	3UTR		0	0
hsa-miR-221-3p	NM_005479	FRAT1	AGCTACATTGTCTGCTGGGTTTC#GAAACCGAGTAGAAAATGTGA#...((((((.((((((.((((((#)))))).)))))).)))))).	2276	2297	1	-23	0	0.335195	0.515	1.33628	1.196	-7.75705	18	21	6	3UTR		0	0
hsa-miR-221-3p	NM_005491	MAMLD1	AGCTACATTGTCTGCTGGGTTTC#GAGGCGCAGAGACAGTGTGTGAGCC#.((((((((((((.(((.(((((#))))).))))))))))))...))).	4365	4390	1	-24.3	1	2.67113e-05	0.397	1.61004	1.82754	-4.65016	20	25	12	3UTR		0	0
hsa-miR-221-3p	NM_005504	BCAT1	AGCTACATTGTCTGCTGGGTTTC#GAGGCAGAGGCAGGCAGTAGCA#.(((((..((((((((..(((((#)))))...))))))))))))).	4541	4563	1	-23.2	0	0.0174228	0.574	-0.729986	-0.104729	-7.65065	18	22	13	3UTR		0	0
hsa-miR-221-3p	NM_005551	KLK2	AGCTACATTGTCTGCTGGGTTTC#GAATGCAGCTGACCCAGCTGATAGAGGAAGTAGCC#.(((((.((.(((((((((((..#.))))))))....))).)).))))).	2683	2718	1	-24.8	0	0.00755542	0.412	-0.0531503	-0.00618409	-6.57952	18	26	8	3UTR		0	0
hsa-miR-221-3p	NM_005552	KLC1	AGCTACATTGTCTGCTGGGTTTC#CCCAGTAGCATTTGCTGTGTAGTC#.(((((((.((((((((((....#)))))))).....)).))))))).	2446	2470	1	-21.6	1	0.000392287	0.544	0.37799	1.46961	-4.84971	17	24	8	3UTR		0	1
hsa-miR-221-3p	NM_005595	NFIA	AGCTACATTGTCTGCTGGGTTTC#GAAAGCTAGTTGTTCCGCAGATAGGAGTAGTC#.(((((.((((((((.(((....#.)))))))))))..))))).	3760	3792	1	-18.8	0	0.00394959	0.544	3.27174	3.55222	-5.57006	16	20	11	3UTR		0	0
hsa-miR-221-3p	NM_005638	VAMP7	AGCTACATTGTCTGCTGGGTTTC#GGAACCACAGTGGATATGCTAGCA#.((((((.(((((((((((((((#)))))).))))))))))).)))).	1632	1656	1	-24	1	0.00291319	0.544	0.263095	0.219768	-6.10696	21	24	11	3UTR		0	0
hsa-miR-221-3p	NM_005658	TRAF1	AGCTACATTGTCTGCTGGGTTTC#GAAACCCAGTCACTGTGAGCTC#((((.(((.((..((((((((((#)))))))))).)).))))))).	2556	2578	1	-22.3	0	0.0268085	0.426	0	0	-13.7489	19	22	10	3UTR		0	0
hsa-miR-221-3p	NM_005662	VDAC3	AGCTACATTGTCTGCTGGGTTTC#GAAGTGTTATTAAATGTGTTCCTCAGCGACAGTGTAGCG#.(((((((((((.((((((....#.))))))))))))))))).	1175	1214	1	-27.9	1	0.00111397	0.529	1.33891	1.93688	-5.08246	17	19	17	3UTR		0	0
hsa-miR-221-3p	NM_005708	GPC6	AGCTACATTGTCTGCTGGGTTTC#ACCCTGCATGGATGTGGTC#.((((((((...(((.((((...#)))).)))..)))))))).	4896	4915	1	-18.6	1	0.000855175	0.603	0	0	-11.4405	15	19	8	3UTR		0	0
hsa-miR-221-3p	NM_005775	SORBS3	AGCTACATTGTCTGCTGGGTTTC#AATTGGGCAGCTGTGTGGCA#.(((((((.(.(((((.((((..#)))).)))))).))))))).	3130	3150	1	-20.9	1	0.000532542	0.412	0.417487	-0.0988574	-7.67449	17	20	7	3UTR		0	0
hsa-miR-221-3p	NM_005796	NUTF2	AGCTACATTGTCTGCTGGGTTTC#GACTTCTGGATGGTATAAACCTAGTGGCAATGTAGCA#.(((((((((((.(((((((((.#.)))))))))))))))))))).	1702	1739	1	-29.2	1	0.00260059	0.574	0.632537	0.460713	-5.08246	20	22	20	3UTR		0	0
hsa-miR-221-3p	NM_005801	EIF1	AGCTACATTGTCTGCTGGGTTTC#GAGCCACCATGCCCAGCAGGTCAACTGTTTTTGCAAGCA#.(((((((((((((((((((...#.)))))))))).))).))).......))).	1747	1786	1	-23	1	0.00516094	0.515	0.00833575	0.0638681	-3.79332	19	30	10	3UTR		1	0
hsa-miR-221-3p	NM_005811	GDF11	AGCTACATTGTCTGCTGGGTTTC#CCCAGCTGGACAGTGCCTAGA#..(((((((((((((((((....#)))))).))))))))..))).	3167	3188	1	-22.6	1	0.00341355	0.456	1.44468	1.14261	-4.957	17	21	8	3UTR		0	0
hsa-miR-221-3p	NM_005822	RCAN2	AGCTACATTGTCTGCTGGGTTTC#GAATGCAGCAGCAGCTGAGCA#.(((.(((((.((((((.((((.#)))).))))))))).))))).	1894	1915	1	-19.9	0	3.16036e-05	0.544	0.392685	1.65704	-10.7371	18	21	9	3UTR		0	0
hsa-miR-221-3p	NM_005828	DCAF7	AGCTACATTGTCTGCTGGGTTTC#GAGCCCTTGGGGCAGGCAGTTTGGG#..(((.((((((((((((((((.#))))))....)))))))))).))).	2677	2702	1	-22.8	0	0.00629769	0.456	0.487375	-0.0615038	-6.85796	19	25	10	3UTR		1	1
hsa-miR-221-3p	NM_005857	ZMPSTE24	AGCTACATTGTCTGCTGGGTTTC#ACTCAGCAGAGATGGCC#.((((...(.((((((((((...#)))))))))).))))).	2261	2278	1	-19.5	0	0.00338815	0.647	0.419234	0.380822	-10.7941	15	17	10	3UTR		0	0
hsa-miR-221-3p	NM_005871	SMNDC1	AGCTACATTGTCTGCTGGGTTTC#GATGTATAGCCCTGTATACAGTGTAGA#..(((((((((.(((.(((((..#.))))).))).))))))))).	1637	1664	1	-22.1	1	0.00171655	0.676	-0.684306	0.172257	-8.53685	17	21	9	3UTR		0	0
hsa-miR-221-3p	NM_005897	IPP	AGCTACATTGTCTGCTGGGTTTC#TCCAGCAGGCAGTATGCA#.((...(((((((((((((....#)))))))))))))..)).	2760	2778	1	-22.6	0	0.00219309	0.559	3.21056	4.41301	-12.8453	15	18	13	3UTR		0	0
hsa-miR-221-3p	NM_005902	SMAD3	AGCTACATTGTCTGCTGGGTTTC#GAGGCCCAGTGCATATGCAATGTAT#...((((((((.(((((((((((#))))))))))).....)))))))).	2569	2594	1	-21.6	0	0.000877764	0.603	0.600284	0.250375	-9.86134	19	25	11	3UTR		0	0
hsa-miR-221-3p	NM_005933	KMT2A	AGCTACATTGTCTGCTGGGTTTC#GGAGCCCAGCACTGTGGCC#.((((((.....(((((((((((#))))))))))).)))))).	14245	14264	1	-24.1	1	4.76253e-05	0.456	1.98137	1.56906	-14.5774	17	19	11	3UTR		1	1
hsa-miR-221-3p	NM_005962	MXI1	AGCTACATTGTCTGCTGGGTTTC#AAACTCAGCCTGGGACAGTTTATCATGAAGCCTGTGGA#..((((((((((((((((((((.#)))))))))...))))))..............))))).	1385	1423	1	-18.8	1	0.000323698	0.676	1.83265	1.02877	-4.957	20	38	9	3UTR		0	0
hsa-miR-221-3p	NM_005983	SKP2	AGCTACATTGTCTGCTGGGTTTC#GAATCAATATAGGATTTGAAGGCCCAGCAGACAGTT#......((((((((((((((((.#.)))))))))))))))).	2058	2094	1	-26.9	0	0.0411048	0.632	0.368323	-0.0115493	-15.5666	16	18	16	3UTR		0	0
hsa-miR-221-3p	NM_006018	HCAR3	AGCTACATTGTCTGCTGGGTTTC#GAAACTGTGGCAGATGAGTGGG#..((((.(((((((((.((((((#))))))..))))))))))))).	1298	1320	1	-21.3	0	0.00222648	0.5	0.995778	0.748347	-6.50069	19	22	13	3UTR		0	0
hsa-miR-221-3p	NM_006067	EMC8	AGCTACATTGTCTGCTGGGTTTC#GGGGCAAAAGCAGACATCTCTGGTAGCA#.(((((..((((((((..(((((#)))))...))))))))......))))).	1516	1544	1	-22.1	0	0.00196278	0.471	4.07028	4.14251	-7.65065	18	28	8	3UTR		0	0
hsa-miR-221-3p	NM_006068	TLR6	AGCTACATTGTCTGCTGGGTTTC#GAACCTGGGAGACAGAGGCTGTAGTG#.((((((((((((.((((((((.#)))))))).))))))....)))))).	4699	4725	1	-23.5	1	0.000121881	0.456	0.671522	1.68031	-4.65016	20	26	8	3UTR		0	0
hsa-miR-221-3p	NM_006078	CACNG2	AGCTACATTGTCTGCTGGGTTTC#GGGGCCCAGCGGGTTCAACAATGACACTGCA#.((..((((((((((((((((((#)))))))))))).....)))))).....)).	3289	3320	1	-24.1	0	0.0120039	0.515	0.967468	0.909609	-10.9444	20	31	12	3UTR		0	0
hsa-miR-221-3p	NM_006090	CEPT1	AGCTACATTGTCTGCTGGGTTTC#AGCATGCAGAATAATGTGGTA#.((((((((((((((..(.(...#).)..))))).))))))))).	2013	2034	1	-18.4	1	0.000691571	0.662	2.65461	2.07998	-4.02637	16	21	9	3UTR		0	0
hsa-miR-221-3p	NM_006091	CORO2B	AGCTACATTGTCTGCTGGGTTTC#ACCCAGCAGGTCAACAATGGGCC#.(((.(((((((((((((((...#)))))))))....))))))))).	2478	2501	1	-24.6	0	0.000152396	0.471	0.406237	0.356801	-7.91236	18	23	9	3UTR		0	0
hsa-miR-221-3p	NM_006100	ST3GAL6	AGCTACATTGTCTGCTGGGTTTC#AGCCATAGGCTGCAGTGTGGCTG#(((((((((((..(((.((((..#))))...))).))))))))))).	3264	3287	1	-21.9	1	8.91261e-06	0.559	-0.253926	-0.147617	-8.57351	18	23	11	3UTR		0	0
hsa-miR-221-3p	NM_006134	TMEM50B	AGCTACATTGTCTGCTGGGTTTC#GAACCCGGGGGGCAGAGGTTGTAGTG#.((((((((((((.((((((((.#)))))))).))))))....)))))).	1176	1202	1	-25.8	1	0.00021253	0.412	0.552145	-0.070542	-4.65016	20	26	8	3UTR		0	0
hsa-miR-221-3p	NM_006257	PRKCQ	AGCTACATTGTCTGCTGGGTTTC#ATTCTCAGCAGACTCCAGTATTGGCA#.(((((...((((((((((....#.))))))))))....))...))).	2928	2954	1	-19.5	0	0.0028645	0.529	0	0	-8.70704	15	24	10	3UTR		0	0
hsa-miR-221-3p	NM_006275	SRSF6	AGCTACATTGTCTGCTGGGTTTC#ACCCAGTAGTCAGTCCCCTTTGTAGTTA#((((((((((.(((((((((...#))))))))).))).......))))))).	2208	2236	1	-22.8	1	0.0235612	0.618	0.261362	0.44996	-6.76235	19	28	9	3UTR		0	0
hsa-miR-221-3p	NM_006294	UQCRB	AGCTACATTGTCTGCTGGGTTTC#GGGCCTCTGATAATGTGGCTG#((((((((((((....((((((.#))))))..)))))))))))).	5674	5695	1	-21	1	9.22051e-05	0.559	0.225196	-0.126299	-7.05204	18	21	12	3UTR		0	0
hsa-miR-221-3p	NM_006329	FBLN5	AGCTACATTGTCTGCTGGGTTTC#GGGAGCTGGCGGGGAACCCTGGGAGTAGCTA#((((((.((.((((((((.((((#)))).)))))))).))........)))))).	2228	2259	1	-19.7	0	0.000854829	0.441	0.404643	0.466335	-6.72377	20	31	8	3UTR		0	0
hsa-miR-221-3p	NM_006346	PIBF1	AGCTACATTGTCTGCTGGGTTTC#AAGCCCAGTAATGGTGGTCAGATACCATGTAGA#..((((((((((((((((((((.#))))))))..........))))))..)))))).	2938	2971	1	-20.7	1	0.000195884	0.603	0.0512789	0.0952691	-4.957	20	33	8	3UTR		0	0
hsa-miR-221-3p	NM_006370	VTI1B	AGCTACATTGTCTGCTGGGTTTC#TCTGGCAGGCTGTGGCG#.((((((..((((((((((....#)))))))))))))))).	3221	3238	1	-21.9	1	0.000264173	0.515	-0.379087	0.290573	-7.16335	16	17	16	3UTR		0	0
hsa-miR-221-3p	NM_006399	BATF	AGCTACATTGTCTGCTGGGTTTC#GAGACCCGGAGACAGAGGCC#.(((...((((((.(((((((((#))))))))))))))).))).	681	701	1	-23.3	0	1.29143e-05	0.382	-0.178053	0.129856	-12.2138	18	20	15	3UTR		0	0
hsa-miR-221-3p	NM_006434	SORBS1	AGCTACATTGTCTGCTGGGTTTC#ACCTTCAGGACAGTGCAGCTG#((((.((((((((...((((...#))))...)))))))).)))).	3040	3061	1	-20.8	0	0.000736755	0.603	1.56048	0.644407	-9.88195	16	21	8	3UTR		0	0
hsa-miR-221-3p	NM_006458	TRIM3	AGCTACATTGTCTGCTGGGTTTC#AGACCTGGCAGCACTGAATGTGGGCTG#((((((((((((((((((((((.#))))))))))).))..))))))).)).	2668	2695	1	-23.2	1	0.000112521	0.309	1.32887	2.56021	-3.93757	22	27	11	3UTR		0	0
hsa-miR-221-3p	NM_006476	ATP5MG	AGCTACATTGTCTGCTGGGTTTC#AACCCTAAATACACGTCTGTTTAGCCCGCAATTGGAAAGGATATATGTGGCA#.((((((((((((((.(((((..#.)))))))).........)))).))))))).	548	600	1	-19.7	1	0.0100783	0.588	0.300193	0.0744331	-4.02637	19	31	8	3UTR		0	0
hsa-miR-221-3p	NM_006511	RSC1A1	AGCTACATTGTCTGCTGGGTTTC#GAAACCTGCAAGCAGAATGTTGAGCC#.(((.((...(((((((((((((#)))))))...))))))....))))).	2114	2140	1	-20.1	0	0.00317987	0.676	2.28832	1.25623	-12.5249	18	26	7	3UTR		0	0
hsa-miR-221-3p	NM_006539	CACNG3	AGCTACATTGTCTGCTGGGTTTC#GAGCCCCGAAGCAGCTAATGTAATAAGCA#.(((((((((.(((((((((((.#))))))...))))).))))))....))).	1852	1881	1	-21	1	0.0169984	0.588	1.45964	1.99037	-6.6181	20	29	6	3UTR		0	0
hsa-miR-221-3p	NM_006545	NPRL2	AGCTACATTGTCTGCTGGGTTTC#GAGACCCAGCAGTGAATGAAATAGCC#.((((((((..((((((((((((#))))))))))))..))))...)))).	1417	1443	1	-28.1	1	0.0251233	0.382	-0.114671	1.38096	-7.86061	20	26	12	3UTR		0	0
hsa-miR-221-3p	NM_006581	FUT9	AGCTACATTGTCTGCTGGGTTTC#AATCTAGAGATTTTGTAGCA#.((((((..((((.(((((((..#)))))))))))..)))))).	6101	6121	1	-19.9	1	0.000363967	0.676	-0.0546558	0.249356	-8.02019	17	20	11	3UTR		0	0
hsa-miR-221-3p	NM_006599	NFAT5	AGCTACATTGTCTGCTGGGTTTC#GAAACCCATTGAGGCAATGGCGTC#.((..((((((((..((((((((#))))))))...))))))))..)).	7248	7272	1	-22.7	0	3.6863e-06	0.559	3.42051	2.40837	-12.5367	18	24	8	3UTR		1	0
hsa-miR-221-3p	NM_006620	HBS1L	AGCTACATTGTCTGCTGGGTTTC#AACCTCTAGGATAATGTGGCTT#(((((((((((((...(((((..#)))))...))))))))))))).	4815	4837	1	-23	1	0.000296597	0.632	1.34019	0.604457	-5.76291	18	22	13	3UTR		0	0
hsa-miR-221-3p	NM_006624	ZMYND11	AGCTACATTGTCTGCTGGGTTTC#ACCCAGTAGCCCCATTTCATACAATGTACCTA#((.(((((((((((((((((...#)))))))))...........)))))))).)).	3667	3699	1	-21.6	0	0.17203	0.618	0.151017	0.949541	-5.49511	19	32	9	3UTR		0	0
hsa-miR-221-3p	NM_006676	USP20	AGCTACATTGTCTGCTGGGTTTC#CCCAGCAGCAGCAGTGCAGAGCC#.(((.((((((((((((((....#))))))))..))))))...))).	3933	3956	1	-23.8	0	0.00125691	0.353	-0.333969	-0.558011	-7.91236	17	23	8	3UTR		0	0
hsa-miR-221-3p	NM_006690	MMP24	AGCTACATTGTCTGCTGGGTTTC#GGAACCCAGCACCCTCTGTGGG#..(((((..(..(((((((((((#)))))))))))..)..))))).	2342	2364	1	-24.2	0	1.13395e-05	0.368	0	0	-14.4986	17	22	11	3UTR		0	0
hsa-miR-221-3p	NM_006695	RUNDC3A	AGCTACATTGTCTGCTGGGTTTC#GACCCTAGATCTTCTTTGAGACAAGGCAGGCTGTGGCC#.((((((..(((((((..(((((#.)))))..))))))))))))).	1601	1639	1	-24.9	1	5.25207e-06	0.5	0	0	-7.16335	18	22	13	3UTR		0	0
hsa-miR-221-3p	NM_006713	SUB1	AGCTACATTGTCTGCTGGGTTTC#GATGAAGCAGACAGATTGAGGCACAGATTTTAGTGGCTTTGTGGCA#.(((((((((((((((..(((..#)))..))))))))).........................)))))).	1558	1604	1	-18.9	1	0.00069734	0.559	0.67565	0.593223	-3.79332	18	46	9	3UTR		0	0
hsa-miR-221-3p	NM_006725	CD6	AGCTACATTGTCTGCTGGGTTTC#GGGGCCCAGTCTCCATGGGGGCAAGGAGCA#.(((...((((((((((((((((#))))))))))........))))))..))).	2994	3024	1	-22.2	0	3.91667e-05	0.426	0	0	-11.357	19	30	10	3UTR		0	0
hsa-miR-221-3p	NM_006729	DIAPH2	AGCTACATTGTCTGCTGGGTTTC#ACCCAGGCTGCAGTGTAGTG#.((((((((((...((((((...#))))))...)))))))))).	7502	7522	1	-23.6	1	5.16509e-05	0.485	0	0	-9.2861	16	20	10	3UTR		0	0
hsa-miR-221-3p	NM_006731	FKTN	AGCTACATTGTCTGCTGGGTTTC#GGAGCTTGGCAGATTTTCCTCTGACACCAGAGAACAATAGTAGTC#.((((((((((((((((((((((#))))))))))))).....................)))).))))).	2969	3014	1	-20.7	1	0.0011772	0.559	0.340888	0.289108	-3.79332	22	45	13	3UTR		0	1
hsa-miR-221-3p	NM_006750	SNTB2	AGCTACATTGTCTGCTGGGTTTC#GAACCCAGGAGGCAGAAGTTGCAGTGAGCTG#((((.((((((((.((((((((.#)))))))).))))).........))))))).	7557	7588	1	-24.4	0	0.00144007	0.441	0	0	-8.91345	20	31	8	3UTR		0	0
hsa-miR-221-3p	NM_006769	LMO4	AGCTACATTGTCTGCTGGGTTTC#GAGATCTGACTAGCAGCAAAGTGTAGCA#.((((((((..(((((((.....#.)))))))...)))))))).	4616	4644	1	-22.7	1	0.000297205	0.529	0	0	-7.86061	15	20	8	3UTR		0	0
hsa-miR-221-3p	NM_006802	SF3A3	AGCTACATTGTCTGCTGGGTTTC#GAGACCCTGTCTCATTAAAAAAAAAAAAAAGGCATGGTGGCA#.(((((..(((((((.(((((((#))))))).))...................)))))..))))).	2206	2248	1	-22.9	0	0.00687542	0.544	0	0	-7.8837	19	42	7	3UTR		0	0
hsa-miR-221-3p	NM_006809	TOMM34	AGCTACATTGTCTGCTGGGTTTC#GAAACCCAGCATGCCCCAAGTGAGCTC#((((.((((((.(((((((((((#))))))))))).))....)))))))).	1072	1099	1	-25	0	0.0033197	0.382	2.65244	3.27047	-11.4034	21	27	11	3UTR		0	0
hsa-miR-221-3p	NM_006823	PKIA	AGCTACATTGTCTGCTGGGTTTC#GAAACCTGTAGTAGCAGTAGTAGTA#.(((((((((.((((((((((((#)))))))..))))))))).))))).	3739	3764	1	-22.2	1	0.0196903	0.618	0.419457	0.401022	-6.6181	21	25	9	3UTR		1	0
hsa-miR-221-3p	NM_006886	ATP5F1E	AGCTACATTGTCTGCTGGGTTTC#AAACCAGTAGTATAATAAACTTCCTGCCTCCAGCAGTGCTGGGTAGCTG#((((((...((((((((((....#.)))))))).))...)))))).	2030	2079	1	-23.7	0	1.95354e-07	0.471	0	0	-8.85129	16	22	8	3UTR		0	0
hsa-miR-221-3p	NM_006888	CALM1	AGCTACATTGTCTGCTGGGTTTC#GAAGCTGGGTGGACTCTTAGTGGTC#.(((((...(((((((.((((((#)))))).))))))).....))))).	2921	2946	1	-21.2	0	1.6347e-05	0.515	1.01259	-0.0115111	-8.70704	18	25	7	3UTR		0	1
hsa-miR-221-3p	NM_006909	RASGRF2	AGCTACATTGTCTGCTGGGTTTC#CCCAGAGGATTCCAGACAGTGGCTGGCTG#(((((((((((((((((((....#))))).......)))))))))..))))).	4769	4798	1	-23.2	1	3.42661e-05	0.412	0	0	-3.93757	19	29	9	3UTR		0	0
hsa-miR-221-3p	NM_006918	SC5D	AGCTACATTGTCTGCTGGGTTTC#GGGACTCAGCAGACAC#........(((((((((((((((#))))))))))))))).	4264	4280	1	-23.7	0	0.000974565	0.5	-0.310189	0.0606088	-19.4239	15	16	15	3UTR		0	0
hsa-miR-221-3p	NM_006920	SCN1A	AGCTACATTGTCTGCTGGGTTTC#GAAATCCAGCCCCTAGACCAAGTAGA#..((((...((((((((((((((#))))))))))....))))...)))).	7167	7193	1	-21.4	0	0.0144468	0.574	4.72059	5.17429	-9.87071	18	26	10	3UTR		0	0
hsa-miR-221-3p	NM_006933	SLC5A3	AGCTACATTGTCTGCTGGGTTTC#GAGCCTGGCCAGGGTCATGTAGCC#.(((((((..((((((((((((.#))))))))).)))...))))))).	5871	5895	1	-22.3	1	7.92371e-05	0.529	0.384656	0.164619	-6.09222	19	24	9	3UTR		0	0
hsa-miR-221-3p	NM_006965	ZNF24	AGCTACATTGTCTGCTGGGTTTC#GATATCTGCCCAGTAGCCACTGAGCA#.(((.((.((.(((((((((...#.))))))))).)).))))).	3895	3921	1	-22.2	0	7.40304e-05	0.544	2.36902	0.929519	-13.0508	16	20	9	3UTR		0	0
hsa-miR-221-3p	NM_006977	ZBTB25	AGCTACATTGTCTGCTGGGTTTC#GAACCCGGGAGGCAGAGGTTGCA#.((.((.((((((.((((((((.#)))))))).))))))..)).)).	5039	5062	1	-24.2	0	6.75951e-05	0.397	0.345567	0.144174	-9.22587	18	23	8	3UTR		0	0
hsa-miR-221-3p	NM_006989	RASA4	AGCTACATTGTCTGCTGGGTTTC#GAGACCAGCCTGGGCAACGTGGCG#.(((((.(((((((((.((((((#)))))))))..)))))).))))).	5247	5271	1	-24.2	0	4.98116e-05	0.5	0.786427	2.09553	-5.33701	20	24	9	3UTR		0	0
hsa-miR-221-3p	NM_006990	WASF2	AGCTACATTGTCTGCTGGGTTTC#ACCCAGCACAGCAAATGGTTGTAGTA#.((((((((((.((((((((...#))))))))..)))).....)))))).	3387	3413	1	-21.5	1	0.000482509	0.485	-0.00681274	0.249805	-7.14013	18	26	8	3UTR		1	0
hsa-miR-221-3p	NM_007042	RPP14	AGCTACATTGTCTGCTGGGTTTC#GAGACCGCGCTGAACTTAGGAGGGCCTTCACACAGACTGATGTGGCTA#((((((((((((((..((((((.#.)))))).....))))).))))))))).	801	849	1	-22.9	1	0.000611198	0.529	2.86566	2.01221	-4.90607	20	28	9	3UTR		0	0
hsa-miR-221-3p	NM_007043	KRR1	AGCTACATTGTCTGCTGGGTTTC#AAATCTAGTAGAAAAATGGTCAGCC#.(((.((((.((((((((((((.#))))))))))))..))))...))).	9184	9209	1	-18.4	0	0.0272125	0.735	3.74855	3.67598	-9.15487	19	25	12	3UTR		0	0
hsa-miR-221-3p	NM_007067	KAT7	AGCTACATTGTCTGCTGGGTTTC#GCCCAGCCAAGTAACTTTTAACAGTGTGGTA#.(((((((((((((((((((...#)))))))..)).........)))))))))).	6735	6766	1	-22.4	1	0.0465666	0.574	0.134899	0.148009	-3.79332	19	31	10	3UTR		0	0
hsa-miR-221-3p	NM_007088	CALB2	AGCTACATTGTCTGCTGGGTTTC#ACCTTGCCAATGGTGTAGCTG#(((((((((((..((.((((...#)))).))..))))))))))).	1195	1216	1	-20.2	1	0.00011883	0.456	0.566125	0.0406915	-8.80656	17	21	11	3UTR		0	0
hsa-miR-221-3p	NM_007137	ZNF81	AGCTACATTGTCTGCTGGGTTTC#AAGCACCATAGACTTGGTGGCTT#((((((...(((((.(((((((.#)))).))))))))...)))))).	5122	5145	1	-19.5	0	0.00447441	0.647	0.32652	0.253039	-9.58674	18	23	8	3UTR		0	0
hsa-miR-221-3p	NM_007145	ZNF146	AGCTACATTGTCTGCTGGGTTTC#GAAACCTGCAGCAGAGATAATGGTG#.((((...(.(((((((((((((#))))))..))))))).)...)))).	2094	2119	1	-20.5	0	0.00298601	0.588	-0.375835	0.212359	-10.7941	18	25	7	3UTR		0	0
hsa-miR-221-3p	NM_007173	PRSS23	AGCTACATTGTCTGCTGGGTTTC#GAACAGGCTGTATTTCCTCCCAGCAAACAGTTGTGGCC#.((((((((((.(((((((....#.))))))).))))).))))).	2112	2150	1	-25.3	1	0.000595294	0.574	0.424507	0.678101	-7.14013	17	21	7	3UTR		0	0
hsa-miR-221-3p	NM_007186	CEP250	AGCTACATTGTCTGCTGGGTTTC#GAACCCAGGAGGCAGAGGTTGCA#.((.((.((((((.((((((((.#)))))))).))))))..)).)).	15105	15128	1	-24.9	0	0.000100371	0.426	-0.075671	0.0491543	-9.22587	18	23	8	3UTR		0	0
hsa-miR-221-3p	NM_007210	GALNT6	AGCTACATTGTCTGCTGGGTTTC#GAAATCCTAGCACTTTGGGAAGACAATGTGGG#..(((((((((((((((((((((#)))).))))))).........)))))))))).	2520	2552	1	-24.7	1	0.0156304	0.5	0.00779229	-0.0859771	-4.957	21	32	10	3UTR		0	0
hsa-miR-221-3p	NM_007218	RNF139	AGCTACATTGTCTGCTGGGTTTC#GAAACTTGAGTAGCAGTGTAATTGAGCTG#((((((((((.((((((((((((#))))))).))))))))))).....)))).	2741	2770	1	-20.6	1	0.000537659	0.603	0.291642	0.0720441	-6.76235	22	29	11	3UTR		0	0
hsa-miR-221-3p	NM_007236	CHP1	AGCTACATTGTCTGCTGGGTTTC#ACCAGATGTAGACTGTAGCC#.((((((..((((((..(((...#)))....)))))))))))).	1044	1064	1	-18.2	1	0.0117424	0.441	0.118732	0.556695	-7.3964	15	20	12	3UTR		0	0
hsa-miR-221-3p	NM_007253	CYP4F8	AGCTACATTGTCTGCTGGGTTTC#GCCCAGGCCGGAGTGCAGTGGCTC#((((((....((((((((((...#))))))..)))).....)))))).	2188	2212	1	-19.6	0	1.48095e-05	0.382	-0.074823	0.109671	-10.0938	16	24	6	3UTR		0	0
hsa-miR-221-3p	NM_007255	B4GALT7	AGCTACATTGTCTGCTGGGTTTC#GGGCCCAGCTCTGACAGGATGTGGA#..((((((((((.(((((((((.#)))))))))...))))..)))))).	1135	1160	1	-23.6	1	0.00278561	0.368	-0.372895	-0.0428645	-6.24613	19	25	9	3UTR		0	0
hsa-miR-221-3p	NM_007260	LYPLA2	AGCTACATTGTCTGCTGGGTTTC#AGGCCTCTGGGGGCAGGTGGCA#.(((((.((((((.(.((((((.#))))))..).))))))))))).	952	974	1	-21	0	4.06664e-05	0.324	0.174278	0.607632	-6.4269	18	22	11	3UTR		0	0
hsa-miR-221-3p	NM_007326	CYB5R3	AGCTACATTGTCTGCTGGGTTTC#CCCAGAGGCAAACCAGCTG#((((...((((((.(((((....#)))))))))))...)))).	2589	2608	1	-19.4	0	0.00755041	0.456	0	0	-12.3581	15	19	11	3UTR		0	0
hsa-miR-221-3p	NM_007365	PADI2	AGCTACATTGTCTGCTGGGTTTC#CCCATGTGCAGACAGTGTGTCTT#((.((((((((((((((((....#))))...)))))))))))).)).	3947	3970	1	-23.6	0	0.000405584	0.515	3.17876	2.58364	-5.49511	18	23	12	3UTR		0	0
hsa-miR-221-3p	NM_012125	CHRM5	AGCTACATTGTCTGCTGGGTTTC#GAGAACCAGCAGGAGAATGTAC#...((((((.((((((((.((((#)))).))))))).).)))))).	3089	3111	1	-21.2	0	0.00307118	0.544	-0.213435	0.534897	-7.75705	18	22	7	3UTR		0	0
hsa-miR-221-3p	NM_012142	CCNDBP1	AGCTACATTGTCTGCTGGGTTTC#GAGCCCAGCTTGATCAATGTAA#...(((((((((.(((((((((.#)))))))))..)).))))))).	2915	2937	1	-23.6	0	0.000688958	0.632	-0.703346	0.1813	-7.80367	18	22	9	3UTR		0	0
hsa-miR-221-3p	NM_012154	AGO2	AGCTACATTGTCTGCTGGGTTTC#GGGACCCAGCTTTCTTTACAATGTGGA#..(((((((((..((((((((((#)))))))))).......))))))))).	12401	12428	1	-25.1	1	0.0114422	0.574	5.7203	5.32138	-9.59293	19	27	10	3UTR	MIRT559694	0	0
hsa-miR-221-3p	NM_012158	FBXL3	AGCTACATTGTCTGCTGGGTTTC#GGAACAGAAGGGAGGCAGTGTTTAGCTT#(((((((((((((.((..(((((#)))))....)).)))))))))..)))).	2254	2282	1	-21.1	1	0.000814776	0.647	5.73285	5.61918	-4.79441	20	28	9	3UTR		0	0
hsa-miR-221-3p	NM_012194	KIAA1549L	AGCTACATTGTCTGCTGGGTTTC#AGGCCCAGTTAGCACAATGTCTTGCTC#(((.((((((((((((((((((.#))))))))).)).)))))))...))).	11628	11655	1	-23	0	0.00172855	0.632	0.321396	0.490928	-6.9696	21	27	9	3UTR		0	1
hsa-miR-221-3p	NM_012199	AGO1	AGCTACATTGTCTGCTGGGTTTC#AGCCCTGCAGACAAAAGCTG#((((...((((((((.(((((..#))))).)))))))).)))).	3146	3166	1	-24.1	0	4.81513e-05	0.559	1.20789	2.53454	-11.7343	17	20	8	3UTR		0	0
hsa-miR-221-3p	NM_012218	ILF3	AGCTACATTGTCTGCTGGGTTTC#CCAGCAGTGCAATGGGCA#.(((.(((((((((((((.....#))))))).))))))))).	3482	3500	1	-23.4	0	0.000402825	0.412	0	0	-7.91236	16	18	9	3UTR		0	0
hsa-miR-221-3p	NM_012232	CAVIN1	AGCTACATTGTCTGCTGGGTTTC#GAGCCCAGGAGTTTGAGGCTGCAGTGAGCTA#((((.((((((((.((((((((.#)))))))).)).........)))))))))).	2852	2883	1	-24	0	4.49776e-05	0.397	2.34443	2.14747	-8.91345	20	31	10	3UTR		0	0
hsa-miR-221-3p	NM_012236	SCMH1	AGCTACATTGTCTGCTGGGTTTC#GAGGCCCTCTGCAGATAGGCGTGGCC#.(((((.((((((((.(((((((#)))))))...))))))))..))))).	3006	3032	1	-27	0	1.20143e-06	0.382	1.58856	2.15531	-5.57006	20	26	8	3UTR		0	0
hsa-miR-221-3p	NM_012266	DNAJB5	AGCTACATTGTCTGCTGGGTTTC#GAAGCCCAAGCAGGCCCTCAGTATAAGCTG#((((((...((((((((((((((#)))))))).)))))).....))...)))).	2426	2456	1	-23.2	0	0.0001108	0.441	0.374692	0.0128872	-8.85129	20	30	8	3UTR		0	0
hsa-miR-221-3p	NM_012281	KCND2	AGCTACATTGTCTGCTGGGTTTC#ACCCTTAAAATATTTCAGCAGACATGTCTGCA#.((.(((.(((((((((((....#.))))))))))))))..)).	4871	4903	1	-20.8	0	2.33215e-05	0.676	0.967442	1.72331	-9.13898	16	20	14	3UTR		0	0
hsa-miR-221-3p	NM_012316	KPNA6	AGCTACATTGTCTGCTGGGTTTC#GGAACCTTCATAAAGCAGGTCAGCGTGGCC#.(((((.((((((((((((((((#)))))))......)))))).))).))))).	3046	3076	1	-23.6	0	1.04391e-06	0.456	0	0	-5.33701	21	30	7	3UTR	MIRT046883	0	0
hsa-miR-221-3p	NM_012323	MAFF	AGCTACATTGTCTGCTGGGTTTC#GATCACTTAAGCCCAGAAGGCAGAGGTTGTAGTG#.((((((.(.((((((((((((.#.)))))))....))))).).)))))).	2152	2186	1	-24.2	1	0.000351482	0.441	0.138538	-0.00325049	-7.34947	19	27	7	3UTR		0	0
hsa-miR-221-3p	NM_012375	OR52A1	AGCTACATTGTCTGCTGGGTTTC#GGACTTAGCAGATATCCATGGCTG#(((((...((((((((((((((.#))))))))))))))....))))).	3082	3106	1	-22.9	0	0.000540466	0.588	0	0	-9.69585	19	24	14	3UTR		0	0
hsa-miR-221-3p	NM_012385	NUPR1	AGCTACATTGTCTGCTGGGTTTC#AGCCCAGCACAGACCTGGTGTGTTGGCTT#(((((((((((((((((((((..#)))))))))..)))..)))))...)))).	4950	4979	1	-22.1	1	0.000132509	0.441	0.726691	1.0076	-3.93757	21	29	9	3UTR		0	0
hsa-miR-221-3p	NM_012401	PLXNB2	AGCTACATTGTCTGCTGGGTTTC#GCCCAGCGTCTAGACTGTAGCA#.((((((..(((((((((((...#)))))))....)))))))))).	5827	5849	1	-24.1	1	0.0046282	0.353	1.73279	2.22247	-7.16335	17	22	10	3UTR		0	0
hsa-miR-221-3p	NM_012431	SEMA3E	AGCTACATTGTCTGCTGGGTTTC#ACTCAGCTGATTGTAGCA#.((((((..(((.(((((((...#))))))).))))))))).	6877	6895	1	-21.1	1	0.000287563	0.706	1.43952	1.1648	-8.45248	16	18	9	3UTR		0	0
hsa-miR-221-3p	NM_012471	TRPC5	AGCTACATTGTCTGCTGGGTTTC#GAAACTTAGATGGTGATAGTGTAGTA#.(((((((((((..(((((((((#))))))))).....))))))))))).	9488	9514	1	-23	1	0.150713	0.618	0	0	-5.9393	20	26	11	3UTR		0	0
hsa-miR-221-3p	NM_012474	UCK2	AGCTACATTGTCTGCTGGGTTTC#GAACTCGGCAGGCTGAGGAGCA#.(((.....(((((((((((((.#))))))))))))).....))).	4328	4350	1	-23.8	0	1.06214e-05	0.441	-0.211066	-0.228236	-14.727	16	22	13	3UTR		0	0
hsa-miR-221-3p	NM_013236	ATXN10	AGCTACATTGTCTGCTGGGTTTC#GAACTCTGGCAGGCGGTTGAAGTAGTTT#((((((((((((((((((((((.#)))).))))))))))))....)))))).	2061	2089	1	-22.4	1	0.00248394	0.588	0	0	-3.93757	22	28	12	3UTR		0	0
hsa-miR-221-3p	NM_013240	N6AMT1	AGCTACATTGTCTGCTGGGTTTC#GGTCATATGATCCAGCAGATCCAGTGGTG#.(((((...((((((((((((..#.))))))))))))...))))).	1525	1554	1	-24.1	0	0.000137015	0.471	0.149041	0.0209556	-8.70704	17	22	12	3UTR		0	0
hsa-miR-221-3p	NM_013246	CLCF1	AGCTACATTGTCTGCTGGGTTTC#AGACCCAGGAGTCTCCAAAGCACAGAGTGGCA#.(((((.((((((.((((((((.#)))))))).))..........)))).))))).	1340	1372	1	-23	0	0.0159588	0.441	2.78159	3.3229	-6.19385	19	32	8	3UTR		0	0
hsa-miR-221-3p	NM_013253	DKK3	AGCTACATTGTCTGCTGGGTTTC#AAACCGAGCAGGGCTGTGTGA#...(((((.(((((((.(((((.#))))).)))))).).))))).	2367	2388	1	-20.2	0	0.000361641	0.529	2.92338	2.05385	-7.57093	17	21	6	3UTR		0	0
hsa-miR-221-3p	NM_013269	CLEC2D	AGCTACATTGTCTGCTGGGTTTC#AAGCCCAGTAGACTTTGTCCCAGGCC#.((((((..(((((((((((((.#)))))))))))))..)))....))).	4781	4807	1	-26.6	1	0.0105309	0.544	0.0612922	0.104334	-7.16335	19	26	13	3UTR		0	0
hsa-miR-221-3p	NM_013272	SLCO3A1	AGCTACATTGTCTGCTGGGTTTC#GAGACAACAGGGGATAATGTGA#...((((((((((.(((.(((((#)))))..))).)))))))))).	3573	3595	1	-21.6	0	0.000858466	0.662	1.03059	1.19849	-7.37138	18	22	10	3UTR		0	0
hsa-miR-221-3p	NM_013286	RBM15B	AGCTACATTGTCTGCTGGGTTTC#GAAGGTACTGCGGACAGTGTGGG#..(((((((((((((..(.((((#)))).)...))))))))))))).	4160	4183	1	-22.4	1	0.00018492	0.485	-0.975943	-0.461522	-5.19005	18	23	13	3UTR		0	0
hsa-miR-221-3p	NM_013309	SLC30A4	AGCTACATTGTCTGCTGGGTTTC#GAAACCCAGTAGATGTTTGTTGAATTGAACTGAAAATTTATGTGGCC#.((((((((((((((((((((((#)))))))))))))))........................))))))).	3589	3636	1	-28.3	1	0.000386911	0.603	0.436259	0.178341	-3.79332	22	47	15	3UTR		0	0
hsa-miR-221-3p	NM_013332	HILPDA	AGCTACATTGTCTGCTGGGTTTC#GGAGTCCCATTCCTAGCAGACAAGCTGAGCA#.(((...((((((((((((....#.))))))))))))....))).	464	495	1	-25	0	0.00500384	0.5	0.0810709	0.107401	-11.357	15	21	12	3UTR		0	0
hsa-miR-221-3p	NM_013333	EPN1	AGCTACATTGTCTGCTGGGTTTC#GAACCCAGGAGGCGGAGGTTGTAGTG#.((((((((((((.((((((((.#)))))))).))))))....)))))).	7975	8001	1	-25.7	1	2.04924e-06	0.426	0	0	-4.65016	20	26	8	3UTR		0	0
hsa-miR-221-3p	NM_013339	ALG6	AGCTACATTGTCTGCTGGGTTTC#GCCCAAATGTCAGCATCTTGGCTGGCTGGTGTAGCTT#((((((((((((.((((((....#.)))))).))).))))))))).	3137	3174	1	-20.3	1	0.000166723	0.662	1.62904	0.660418	-5.22671	18	22	9	3UTR		1	0
hsa-miR-221-3p	NM_013345	GPR132	AGCTACATTGTCTGCTGGGTTTC#GGAGCCCAGAGAGCATGTGGCA#.(((((((..(((.(((((((((#))))))))))))..))))))).	2276	2298	1	-28.1	1	0.00231342	0.353	1.16897	1.44868	-6.94906	19	22	12	3UTR		0	0
hsa-miR-221-3p	NM_013375	ABT1	AGCTACATTGTCTGCTGGGTTTC#AAGCCTAGTAGAGAACCAGTGCA#.((.((.((.((((((((((((.#)))))))))))).))...)))).	1876	1899	1	-20	0	0.00630423	0.5	0.0919558	-0.292324	-9.61154	18	23	12	3UTR		0	0
hsa-miR-221-3p	NM_013410	AK4	AGCTACATTGTCTGCTGGGTTTC#GCCTGGTTTCCAGACTTGGTGGCC#.(((((...(((((((((((...#))))))....)))))...))))).	2199	2223	1	-19.5	0	0.000274994	0.574	0.602178	0.28015	-8.70704	16	24	6	3UTR		0	0
hsa-miR-221-3p	NM_014045	LRP10	AGCTACATTGTCTGCTGGGTTTC#GGAACCCAGCCCCTAGTGAGCA#.(((.(((((...((((((((((#))))))))))...)))))))).	4038	4060	1	-24	0	0.00684873	0.456	0.0638701	0.0822347	-15.3731	18	22	10	3UTR		0	1
hsa-miR-221-3p	NM_014117	C16orf72	AGCTACATTGTCTGCTGGGTTTC#GAAGCTCAGCAGTAGAAGCG#.(((...((..((((((((((((#))))))))))))..))))).	3518	3538	1	-21.9	0	0.00620904	0.574	-0.186033	0.0772701	-15.4243	17	20	12	3UTR		0	0
hsa-miR-221-3p	NM_014184	CNIH4	AGCTACATTGTCTGCTGGGTTTC#GAAACCTTATAAGCCATTTTCCCCAGGTACAATGTAGTTC#(((((((((((...(((((....#.)))))..))))))))))).	1031	1071	1	-21.8	1	0.0015615	0.647	0.718683	0.71192	-9.43035	16	20	11	3UTR		0	0
hsa-miR-221-3p	NM_014211	GABRP	AGCTACATTGTCTGCTGGGTTTC#GAAAACAAACTGCTTGACCCAGGAACAAGTGGCTT#((((((.((((.(.(((((((..#.))))))).))))))))))).	2586	2621	1	-22.6	0	0.000220099	0.603	-0.0550668	0.337924	-9.6849	18	21	11	3UTR		0	0
hsa-miR-221-3p	NM_014212	HOXC11	AGCTACATTGTCTGCTGGGTTTC#GAGGCCAAGACTTTGATTTAAAAGAAAACACACCTCGGCGACAATGTCTTGCTG#(((.((((((((.(((((((...#.))).))))))))))))...))).	1291	1345	1	-22.2	0	0.0060658	0.485	1.73605	1.06791	-8.25873	18	24	12	3UTR		0	0
hsa-miR-221-3p	NM_014217	KCNK2	AGCTACATTGTCTGCTGGGTTTC#AGGCCTCAGAATGAATGAGAATTGTTTCTGGTAACAATGTAGCTT#(((((((((((.(((((((....#.)))))))))))))))))).	2097	2142	1	-21.1	1	0.00832714	0.632	2.19546	2.21745	-7.28438	18	20	18	3UTR		1	1
hsa-miR-221-3p	NM_001321177	MAP3K19	AGCTACATTGTCTGCTGGGTTTC#GATGCCTCCTTTACCAGACCACTTCTCAGAAAATGCAGCAGACTTTGTGCGCA#.((((((..((((((((.((((.#.)))).))))))))..)))).)).	4177	4230	1	-25.5	1	0.000472759	0.515	0	0	-7.16335	18	24	8	3UTR		0	0
hsa-miR-221-3p	NM_001321196	SLC27A5	AGCTACATTGTCTGCTGGGTTTC#GAAATGACAGTGGGCCCTGTAGCA#.((((((..((((((((.(((((#)))))..))))))))..)))))).	1984	2008	1	-22.8	1	0.000344663	0.5	0	0	-7.16335	19	24	8	3UTR		0	0
hsa-miR-221-3p	NM_001321220	NEK11	AGCTACATTGTCTGCTGGGTTTC#AGCCCAGAAGCCAGACATGCCTGTCTTAGCTG#(((((((.(((((((((((((..#)))))))....)))))))).......))))).	2609	2641	1	-20.1	1	0.000104834	0.471	3.30578	2.68816	-6.25121	20	32	8	3UTR		0	0
hsa-miR-221-3p	NM_001321344	TMEM182	AGCTACATTGTCTGCTGGGTTTC#GAAGCCTCCATCGCAGGGGAGCTCGGCAGGGTATGTGAGCTT#((((((((..(((((((((((((#.)))))))))))))..)))).)))).	1958	2000	1	-25.9	1	4.10957e-05	0.412	0.364656	0.527963	-6.23647	21	26	13	3UTR		0	0
hsa-miR-221-3p	NM_001321561	KIAA0100	AGCTACATTGTCTGCTGGGTTTC#CTCGGTGCTCAGTGTAGTG#.(((((((((..(((((((....#)))))))..))))))))).	1534	1553	1	-18.7	1	0.00331664	0.662	0	0	-9.9649	16	19	9	3UTR		0	0
hsa-miR-221-3p	NM_001321635	NIPAL2	AGCTACATTGTCTGCTGGGTTTC#AACCCAGTGGTCAAACCTGAGCTT#((((.(((((.((((((((((..#)))))))))).)))...)))))).	2349	2373	1	-21	0	0.00324619	0.515	1.37224	1.27565	-10.8814	19	24	10	3UTR		0	0
hsa-miR-221-3p	NM_001321757	CDIN1	AGCTACATTGTCTGCTGGGTTTC#GAGACCCAGCATTGCATTACCATCGTGGAATAATCTAGCG#.((((.(((((((((((((((((#)))))))))))................)).)))).)))).	1150	1190	1	-22.1	0	0.00131881	0.544	2.72342	3.18031	-5.69428	21	40	11	3UTR		0	0
hsa-miR-221-3p	NM_001322225	VLDLR	AGCTACATTGTCTGCTGGGTTTC#GACAAGGTGGTTCTGTTTAGAAGCAGCAGGCAATGTAGTTA#((((((((((((((((..(((((#.))))))))))))))))))))).	7555	7596	1	-28	1	0.0115752	0.544	0	0	-3.93757	21	23	21	3UTR		0	0
hsa-miR-221-3p	NM_001322477	HPS1	AGCTACATTGTCTGCTGGGTTTC#GAAGCCCAGGGGTCCTGTTTGTAAAACAACGGTGGCA#.(((((.((((((.(((((((((#))))))))).)).............))))..))))).	2559	2596	1	-24.4	0	0.00102339	0.412	0.496096	0.0878828	-6.19385	20	37	9	3UTR		0	0
hsa-miR-221-3p	NM_001322862	NIPAL3	AGCTACATTGTCTGCTGGGTTTC#GAGCCCAGAGAGCCAAGGCTACAGTGAGCC#.(((.((((((((.((((((((.#)))))))))))..........)))))))).	4005	4035	1	-19.7	0	8.0643e-06	0.412	0	0	-8.7692	19	30	11	3UTR		0	0
hsa-miR-221-3p	NM_001324039	UROS	AGCTACATTGTCTGCTGGGTTTC#GGAAGCCACAGACAGTTGTTCCAGCTT#((((((((((((((.(((.((((#)))).))))))))))).))...)))).	1336	1363	1	-21.2	1	0.00146611	0.441	0	0	-4.67302	21	27	11	3UTR		0	0
hsa-miR-221-3p	NM_001329237	NEK9	AGCTACATTGTCTGCTGGGTTTC#GAACCCGGGAGGCGGAGCTT#((((...((((((.((((((((.#)))))))).)))))))))).	6927	6947	1	-22.4	0	3.69963e-05	0.382	0	0	-12.3581	18	20	10	3UTR		0	0
hsa-miR-221-3p	NM_001329974	ZNF208	AGCTACATTGTCTGCTGGGTTTC#GGGGCCCGTAGACACCGTGAGG#..((.((((((((((.(((((((#))))))))))))))..))))).	1019	1041	1	-20.2	0	0.000589938	0.338	0	0	-9.30909	19	22	14	3UTR		0	0
hsa-miR-221-3p	NM_001329984	SRGAP2C	AGCTACATTGTCTGCTGGGTTTC#GAGGCCAGGAGTTCAAGACCAGCCTGGACAATGTGGTG#.(((((((((((((((((..((.#.))..)))))..)))))))))))).	5041	5079	1	-25.2	1	0.000210974	0.544	0	0	-3.79332	19	25	12	3UTR		0	0
hsa-miR-221-3p	NM_001330	CTF1	AGCTACATTGTCTGCTGGGTTTC#CCCAGCAGATCTGTGGA#..(((((..((((((((((....#)))))))))).))))).	1544	1561	1	-23.7	0	0.000147653	0.5	0	0	-8.32703	15	17	10	3UTR		0	0
hsa-miR-221-3p	NM_001330196	ASB1	AGCTACATTGTCTGCTGGGTTTC#AGCAGGCAGGCAGTGTCTGGCC#.(((((((((((((((..(((..#))).))))))))))))..))).	2182	2204	1	-21.5	1	9.71623e-07	0.485	0	0	-3.79332	18	22	12	3UTR		0	0
hsa-miR-221-3p	NM_001330321	ANAPC15	AGCTACATTGTCTGCTGGGTTTC#ACCCAGGCTCAGGCAATCCTCCCACCTCAGCATTTCCAGTAGCTG#((((((((((((((((((((...#))))))...)))))))).....................)))))).	869	914	1	-22.7	1	1.76868e-05	0.426	0	0	-3.93757	20	45	8	3UTR		0	0
hsa-miR-221-3p	NM_001330332	CD70	AGCTACATTGTCTGCTGGGTTTC#GCCTGGCCAGGCACAGTGGCTC#((((((..((((((((((((...#))))))).)))))..)))))).	1735	1757	1	-23.7	0	9.27727e-05	0.529	0	0	-7.7949	18	22	7	3UTR		0	0
hsa-miR-221-3p	NM_001330350	UBIAD1	AGCTACATTGTCTGCTGGGTTTC#AGCCTGGCCAATGTGGCA#.(((((((((...((((((((..#))))))))))))))))).	4362	4380	1	-22.4	1	0.00017059	0.588	0	0	-11.254	17	18	17	3UTR		0	0
[truncated: 441 more rows]
