# Supplementary material for: Clinical significance and immune characteristics analysis of miR-221-3p and its key target genes related to epithelial-mesenchymal transition in breast cancer
Source: Aging (Albany NY). 2024 Jan 6;16(1):322–47. doi: 10.18632/aging.205370 (PMC10817385; doi:10.18632/aging.205370)
Supplement: Supplementary Table 2 [file aging-16-205370-s003.xlsx]

## Sheet: Supplement Table 2
Supplementary Table 2. EMT-related genes obtained from the dbEMT 2.0 database (n=1184).
TGFB1
SNAI1
ZEB1
CDH1
TWIST1
CTNNB1
STAT3
SNAI2
HIF1A
AKT1
MIR200C
ZEB2
SMAD3
EGFR
MIR200B
SMAD2
MIR200A
NOTCH1
MIR21
ILK
GSK3B
NFKB1
IL6
HMGA2
CXCR4
TP53
EGF
MTDH
MAPK1
CD44
BMI1
PTEN
MTOR
VIM
RAC1
MMP9
MMP2
GLI1
MET
SMAD4
KLF4
WNT5A
MYC
SMAD7
SIRT1
CTGF
CCR7
PROM1
TGFB2
PIK3CA
MIR34A
RHOA
AR
CD274
FOXM1
YAP1
SRC
MIR30A
MIR205
MALAT1
JAK2
WWTR1
CDH2
TNF
CXCL12
RELA
MAPK3
MIR221
MIR145
CXCL8
HGF
FN1
TWIST2
TP63
NANOG
VEGFA
SP1
S100A4
PTK2
MAPK7
MUC1
HMGB1
EZH2
ESR1
HOTAIR
CAV1
SOX2
BMP7
BMP4
SHH
PTGS2
POU5F1
PRRX1
KRAS
ID1
H19
FGFR1
POSTN
FOXQ1
MTA1
GRHL2
TRPS1
ADAM17
T
AURKA
BMP2
CCL18
CCL2
ROCK1
MIR429
ESRP1
PPARG
NTRK2
EPCAM
MIR93
MIR204
MIR203A
MIR186
MIR155
MIR148A
LOXL2
LGALS1
JUN
ITGB1
HDAC1
GREM1
KDM1A
AGER
NUMB
WNT1
EZR
TLR4
TCF3
STK11
UCA1
CCL21
CCL20
LEF1
PAX2
DDR2
YBX1
MCAM
MIR26B
MIR23A
MIR214
MIR19A
MIR150
MIR141
MIR124-1
MIR101-1
LOX
LCN2
IL17A
IL1B
IGF1R
IGF1
HSF1
HNF4A
FOXA1
FOXC2
ERBB2
EGR1
KLF8
NES
LINC-ROR
MIR300
NUAK1
DCLK1
CLDN1
RUNX2
TET1
TP73
THBD
TGM2
TGFBR3
TGFBR2
TGFB3
STIM1
SRF
BRCA1
SPARC
SOX9
SOX4
FSCN1
SIX1
SDC1
SATB1
BCL2L1
OVOL2
MKL1
NDRG2
EIF5A2
PARD3
PRKCI
AXL
FBXW7
TRIM33
PAK1
OSM
ROR2
NOTCH2
MSX2
MMP14
MIR9-1
MIR30C2
MIR30C1
MIR29C
MIR29B1
MIR26A1
MIR137
MIR130B
MIR10B
MIR106B
MIR106A
MIRLET7A
LEP
L1CAM
RHOC
CYR61
BIRC5
HSPA5
HOXA13
ANXA2
PDCD4
GATA3
ALK
FLOT2
FOXO3
FOXC1
FGFR2
FGF2
AKT2
EPAS1
DNMT1
DAB2
CUX1
CTNND1
CTBP1
MAPK14
NLRP3
CYTOR
AGR2
NDRG1
CDKN1B
CD24
TNFSF15
GDF15
TP53INP1
TM4SF5
WNT3A
WISP2
NRP1
ACTL6A
CUL4A
FZD7
FOSL1
ADAM12
PDGFD
VASH2
TBL1XR1
TNFAIP8L
YWHAG
YY1
XBP1
WT1
VDR
CCR2
MIR655
NR2C2
TIMP2
TGFBR1
TGFA
TERT
MIR630
MIR590
TCF4
BSG
SPRR2A
SPP1
SKIL
SMURF2
SFRP2
CXCL5
CCL5
BDNF
BCL2
RB1
PTPN11
MIR491
MIR485
CEMIP
SALL4
TMPRSS4
MAPK8
PRKCA
MEG3
TUG1
SEMA4C
PIN1
PGF
SERPINF1
GOLM1
PAWR
MIR375
MIR361
NODAL
ATM
MUC4
MMP7
FOXO4
MAP3K4
MAP3K3
MDM2
MIR96
MIR31
MIR222
MIR218-1
MIR181A1
MIR194-1
MIR185
MIR182
MIR181A2
MIR17
MIR143
MIR130A
MIR128-1
MIR10A
JUNB
ITGA5
IGFBP7
HSPB1
HSPA4
HOXB7
FOXA2
HMOX1
HDGF
HAS2
SENP1
RGCC
NEAT1
GPC3
USP22
FOXO1
DKK1
EFEMP1
VWCE
F2R
ELF5
EPHA2
EDN1
JAG1
DLX2
CTSL
PARP1
CRKL
FERMT2
TXNIP
SPRY2
ADAM10
TRIM28
NAMPT
MIR1271
HDAC6
ZBTB33
CDC42
HS3ST3B1
SETDB1
HDAC4
UBE3C
BAG3
MAGED1
CD36
ABCG2
NTN1
ADIPOQ
RNF8
ACVR1
CCNA2
SQSTM1
SPHK1
HDAC3
WISP3
NRP2
RUNX3
STC2
RUNX1
TNFSF11
BHLHE40
LGR5
HAVCR2
AFAP1L2
DYRK2
PITPNM3
AXIN2
AXIN1
NCOA3
ACTN4
ESRP2
PEAK1
CA9
YWHAZ
KDM6A
TUFT1
TPBG
TP53BP2
TLE1
TIMP1
TIAM1
TGFB1I1
TEAD1
TCF21
MIR616
MIR612
MAP3K7
STAT5B
STAT5A
STAT1
BRAF
SRI
SPOCK1
SOX5
BMP6
SKP2
SIM2
SDC2
CCL19
CEACAM1
RPS6KB1
ALX4
RNH1
CCND1
KDM5A
ACTA2
RAF1
PTX3
CIP2A
MTA3
MIR506
MIR497
MIR494
MIR489
PTHLH
PBXIP1
PAK5
CTNNBIP1
KLK6
PRSS8
PROP1
MAP2K1
ERBIN
BTBD7
PRKAA1
TRIM62
RNF111
IL17RD
PLAUR
PKD1
CDK14
PFN2
SUFU
IL23A
MAGEC2
HOOK1
PDCD1
CRIM1
EGFL7
PCBP1
F11R
SERPINE1
FURIN
PEBP1
P2RY2
NFKBIA
NF1
NCL
CEACAM6
MIR196B
MIR373
MIR135B
ZFAS1
MMP3
MMP1
ASCL1
MGAT3
MDK
MCL1
MIR34C
MIR33A
MIR30D
MIR301A
MIR27A
MIR24-1
MIR224
MIR223
MIR218-2
MIR206
MIR20A
MIR199A1
MIR193A
MIR191
MIR187
MIR183
MIR16-1
MIR15B
MIR15A
MIR153-1
MIR146A
MIR135A1
MIR134
MIR132
MIR124-3
MIR124-2
MIR122
MIR101-2
MIR100
LMNA
LGALS3
LASP1
LAMA5
KIT
CD82
JARID2
ITGB4
ITGA3
ITGA2
AQP5
AQP3
IL11
CXCR2
MACC1
TNC
HES1
PRMT1
HRAS
HOXB9
HOXA10
HMGB3
HIC1
HDAC2
H2AFX
GSN
UHRF1
CPS1-IT1
HIPK2
GRN
GPR32
ANG
GLI2
GJB1
NOX1
LRIG1
SLC39A6
FZD2
FUT4
BRD4
SIRT3
DICER1
SATB2
BOP1
EPB41L3
KDM4B
FGF9
FGF1
ETV4
ESRRA
ESR2
ERG
EPS8
EPO
EPHB2
GKN2
TET3
AHR
E2F1
HBEGF
DLX4
DAB2IP
PAQR3
CTSZ
GLIPR2
SLC30A7
RBFOX3
CSNK2B
CRYAB
LINC0026
CRK
CREB1
CLDN7
CLDN4
CLU
UHRF2
EHMT2
PROKR1
WASF3
CFTR
KHDRBS1
TRIM16
CEBPB
CEBPA
HOXB13
TACC3
CDX2
FAM3C
CDKN2A
CDK5
NPTN-IT1
SPRY4-IT1
ZEB2-AS1
MIR1236
MIR675
FGF19
RBM8A
MRC2
GAB2
CD151
HDAC9
SEMA3E
VGLL4
CD63
MICAL2
ISG15
PITPNM1
CXCL14
ONECUT2
ROCK2
RASAL2
EIF2AK3
MAP4K4
QKI
HAND1
CYP7B1
MUC16
FOXP2
ZFYVE9
SLC9A3R1
KL
LHX2
IGSF8
NREP
CD14
NOG
LRRFIP1
MARVELD3
ARHGEF2
SMC3
LATS1
NMI
AOC4P
PSTPIP1
SOCS3
HS6ST2
CCNG2
CDKL2
BTRC
CCND2
TIMELESS
NR1I2
KAT2B
INPP4B
SCEL
TNFRSF11
TNFSF10
TNFSF12
CBR1
EED
ABCC3
CBLB
EIF3I
IRS2
SCIN
IKBKG
PIK3R3
AJUBA
PPM1D
GEMIN2
USMG5
SEMA7A
LOXL3
HINT2
SPZ1
TEAD2
FOXN1
CUL3
KAT8
SPOP
MARVELD1
ITCH
YPEL3
CAPZA1
CAPNS1
SMC1A
USP9X
VANGL1
TRIM11
WNT5B
IFT88
SETD7
PTP4A2
MED28
ELL3
NUBPL
FBXO11
MICALL2
LIN28A
TRPM8
DDR1
ZYX
ZNF217
PCGF2
ZNF143
MIR802
MIR454
MZF1
ZFP36
WNT11
WNT6
VTN
VSNL1
VHL
VCP
UCP2
UCHL3
TYRO3
TYMS
TXN
TUFM
C5AR1
PHLDA2
TSC2
TSC1
MIR663A
TRPC5
ACTG2
TP53BP1
TNXB
TNS1
TLN1
TLE4
TJP1
TIMP3
NR2F2
TFCP2
TDGF1
MIR92B
MIR646
MIR639
MIR638
TCF7
MIR573
TBX3
TBX2
TAZ
KLF5
ST14
SREBF1
SOX3
SON
SOD2
MIR487B
STK33
SLIT3
SLC2A1
SKP1
SKI
ST8SIA1
ST6GAL1
SIAH2
SIAH1
SHC1
CPEB1
AKTIP
SFTPC
SOX17
SEMA4A
ELSPBP1
GOLPH3
CX3CL1
CCL25
CCL22
CCL3
SERPINB4
ATXN1
SALL1
S100P
S100A9
S100A8
S100A6
S100A2
ROS1
RORC
EXOC4
BCL6
RGS3
RDX
HAS2-AS1
RBP2
SENP2
NTN4
RASA1
PRUNE1
CXCL16
PTPRZ1
NKX3-2
PTPN14
PTPN6
SCUBE2
EPB41L5
PTN
STIM2
MTUS1
MKL2
MIR522
MIR517C
MIR520G
MIR452
RAB22A
CAMK1D
TBX20
POGLUT1
PROX1
AJAP1
PRKCQ
HDAC8
PAG1
KDM3A
FOXJ2
PRKCE
PRKAA2
FERMT1
MIR449A
LGR4
BRF2
IMP3
PTPA
PPP1R8
GIPC2
POMC
ERRFI1
MBD3
PLS3
PLAGL2
PLA2G4A
PIK3R1
SERPINI1
ABCB1
STK26
WWOX
UIMC1
CYB5R1
PDGFRB
ACKR4
PDGFB
LIMA1
PRRX2
PDE4A
UBR5
PLAC8
TFDP3
PCSK1
ING4
ANGPTL4
PCMT1
GMNN
PCDH9
PBX3
PARD6A
NEUROG3
IL22
PRDX1
DUXAP9
OPRM1
MIR424
MIR382
MIR381
NUCB2
ROR1
NTRK3
NPPA
NOV
NOTCH4
NOTCH3
NME1
NKX6-1
NFIL3
NFIC
MYL2
MYD88
MYCN
MYBL2
MYB
TRIM37
MUC2
MST1R
MSN
MIR345
MIR331
MIR326
MMP19
MMP13
MMP11
MMP8
MLLT3
ASCL2
MITF
CXCL9
MEF2D
MDM4
ART1
SMAD9
ARRB1
MIR7-1
MIR30E
MIR30B
MIR302A
MIR29A
MIR26A2
MIR25
MIR24-2
MIR23B
MIR217
MIR216A
MIR211
MIR208A
MIR199A2
MIR190A
MIR181B1
MIR153-2
MIR152
MIR149
MIR144
MIR136
MIR129-1
MIR125B1
MIRLET7G
MIRLET7D
MIRLET7B
LYN
LTBP1
LRP6
LMNB1
LIMS1
LIF
LGALS9
LAMC2
USP17L9P
RHOG
NANOGP8
KRT19
RHOB
KMT5A
KRT18
KRT17
KRT8
KRT7
KIF5B
KDR
KCNN4
KCNH1
JAK3
JAG2
ITGB6
ITGB3
IRS1
IRF6
AQP9
ITGA6
FOXK2
IL18
IL6R
IL4
FAS
IGFBP3
MCRIP1
IRGM
NANOS3
IDH2
IDH1
ID2
IRF8
RAB43
HTN1
HSP90AA1
HSPB2
BIRC2
HRG
HPGD
HOXD9
APBB1
HOXA9
HNRNPAB
NR4A1
HK2
HIP1
EHD2
ANXA5
H2AFZ
ANXA1
REPIN1
OLA1
CARD10
GSK3A
BRD7
TBK1
FHOD1
GRIN1
ANPEP
TUSC7
LAMA1
CAVIN1
GPI
GOLGA2
GLRX
GLS
EML4
GLO1
GLS2
AGO2
DKK3
BBC3
LYPD3
GJB2
AMHR2
GH1
GATA6
GATA1
GAPDH
SIN3A
LETMD1
BRMS1
ARMC8
TXN2
SPDEF
FSCN2
CBY1
CERS6
NR5A2
FSHR
IL27
ZMYND8
CCNDBP1
PADI4
MMD
SCRIB
SUZ12
NCSTN
ARHGEF12
NEDD4L
FMR1
EXOC7
FLT1
FLNA
KDM6B
PLXND1
PEG10
SNW1
ALDOB
CEP164
FKBP5
PHLDA1
XRN2
FHL2
FHL1
SCUBE3
FCN2
ZEB1-AS1
FBP1
FASN
FBLN1
ALDH1A1
F3
F2RL2
F2
ETV1
ETS2
ETS1
ESRRB
ALAD
ERN1
ERF
EPHB3
EPHA8
EPHA4
EP300
ENO1
ENG
EMP3
FBXO45
RPL22L1
ELK3
ELK1
CYP4Z1
ELAVL1
EIF5A
EIF4G1
EIF4E
EIF2S1
RMST
EFNB2
EEF1D
EDNRA
ECT2
DVL2
AGTR1
DNMT3B
DDX5
DAPK1
CYP3A5
PEBP4
ZNF746
CYP1B1
CMTM8
CSPG4
VCAN
CSK
CSF2
CRP
CRMP1
FOXR2
CREBBP
ADM
KLF6
COL8A2
COL8A1
KLF17
CNTN1
MSI2
CCR6
CCR5
CLK2
LRG1
CKS2
BATF2
CTHRC1
CIRBP
MGLL
VSIG4
EGLN3
PKP3
RASSF1
FSTL1
PTP4A3
BVES
FOXN3
PIM2
EHD1
PPARGC1A
PGRMC1
HPSE
CCR9
MTHFD2
KDM5B
GNA13
LEFTY1
PDPN
CXCL13
FBLN5
CEACAM5
FST
MAD2L2
TAB1
RACK1
PAK4
CDKN1A
SPRY1
MSLN
PSME3
LINC01186
CDK3
G3BP1
TRAP1
CDH13
CDH11
NR1H3
MICA
OCLN
DNAJB6
MIR1181
CDH5
FRAT1
PDCD6IP
HDAC5
MIR124-2HG
MIR875
MIR888
