# Supplementary material for: Clinical significance and immune characteristics analysis of miR-221-3p and its key target genes related to epithelial-mesenchymal transition in breast cancer
Source: Aging (Albany NY). 2024 Jan 6;16(1):322–47. doi: 10.18632/aging.205370 (PMC10817385; doi:10.18632/aging.205370)
Supplement: Supplementary Table 3 [file aging-16-205370-s004.xlsx]

## Sheet: Supplement Table 3
Supplementary Table 3. Differentially expressed genes (n=2401).
id	logFC	AveExpr	t	P.Value	adj.P.Val	B
CA4	-3.98693	0.897901	-46.3608	5.83174e-271	1.00224e-266	610.018
VEGFD	-4.47733	1.45874	-45.8148	5.54644e-267	4.76606e-263	600.882
C1QTNF9	-1.35921	0.374058	-43.2819	2.2823e-248	1.30746e-244	558.129
CPA1	-1.4647	0.303743	-42.5706	4.26219e-243	1.83125e-239	546.022
HSD17B13	-2.5113	0.590477	-42.489	1.71924e-242	5.90936e-239	544.63
GLYAT	-3.39764	0.715079	-42.0005	7.36086e-239	2.1084e-235	536.288
CD300LG	-4.52049	1.44603	-40.7979	6.92976e-230	1.70136e-226	515.675
HEPACAM	-2.08446	0.413874	-40.7544	1.46738e-229	3.1523e-226	514.926
TSLP	-1.74893	0.565902	-38.9351	6.61022e-216	1.26226e-212	483.56
SCARA5	-4.68418	1.68191	-37.6711	2.24011e-206	3.84985e-203	461.666
LVRN	-2.24051	0.571967	-37.5963	8.22649e-206	1.28528e-202	460.368
LYVE1	-4.16382	2.08695	-37.4825	5.95204e-205	8.52432e-202	458.393
MYOC	-3.33074	0.581899	-37.3308	8.33582e-204	1.102e-200	455.76
ACVR1C	-3.13035	1.00515	-37.0114	2.16079e-201	2.65253e-198	450.214
ABCA10	-2.43547	0.982475	-36.9656	4.79737e-201	5.49651e-198	449.418
HIF3A	-2.19271	0.608552	-36.6714	8.05426e-199	8.65129e-196	444.307
SLC2A4	-2.93676	1.25577	-36.6463	1.2464e-198	1.26004e-195	443.871
MYOM1	-2.55124	1.44019	-36.6278	1.72095e-198	1.64313e-195	443.549
RDH5	-2.2779	0.842325	-36.4065	8.12537e-197	7.34961e-194	439.703
ASPA	-2.1637	0.937648	-36.2078	2.59366e-195	2.22874e-192	436.247
NKAPL	-1.63211	0.87172	-36.0433	4.5618e-194	3.73329e-191	433.386
ADH1A	-1.40978	0.28189	-36.0234	6.4473e-194	5.03651e-191	433.041
ANGPT4	-1.44882	0.483623	-35.7853	4.0933e-192	3.05859e-189	428.899
ALDH1L1	-2.53204	0.73275	-35.672	2.95095e-191	2.11312e-188	426.928
ADRA1A	-1.49014	0.320978	-35.4896	7.10621e-190	4.88509e-187	423.754
ARHGAP20	-2.28164	1.30784	-35.3702	5.69822e-189	3.76652e-186	421.676
SLC17A7	-1.50872	0.655136	-35.1408	3.11385e-187	1.98202e-184	417.684
KLB	-2.85632	1.15908	-34.471	3.68887e-182	2.26418e-179	406.027
LRRC2	-1.50407	0.611461	-34.2939	8.09305e-181	4.79611e-178	402.946
ATOH8	-2.36035	1.04488	-34.0382	6.98511e-179	4.00154e-176	398.497
GPAM	-3.39459	3.54026	-33.9287	4.71666e-178	2.61486e-175	396.591
TMEM132C	-3.59259	1.27957	-33.7916	5.1461e-177	2.76378e-174	394.207
CCL14	-1.59103	0.49571	-33.7708	7.40019e-177	3.85393e-174	393.844
AQP7	-4.09373	1.52636	-33.4645	1.54022e-174	7.78535e-172	388.518
ABCA9	-2.87183	1.47499	-33.297	2.85635e-173	1.36359e-170	385.604
CRHBP	-1.93591	0.850432	-33.2813	3.75471e-173	1.74401e-170	385.331
KCNIP2	-3.91663	2.00668	-33.1483	3.80822e-172	1.72232e-169	383.019
BTNL9	-3.67205	2.36033	-33.1102	7.3982e-172	3.26014e-169	382.357
CCDC178	-1.23585	0.447465	-33.0487	2.15887e-171	9.2756e-169	381.288
ITIH5	-3.63092	2.51929	-32.8796	4.10064e-170	1.71887e-167	378.35
NAALAD2	-1.38987	0.751786	-32.814	1.28646e-169	5.14165e-167	377.209
GPR146	-1.5407	0.959909	-32.757	3.46832e-169	1.3547e-166	376.22
PAMR1	-3.53232	2.6681	-32.6591	1.90528e-168	7.27649e-166	374.52
C14orf180	-2.53287	0.61795	-32.6235	3.54443e-168	1.32423e-165	373.9
LEP	-5.53978	1.8455	-32.5566	1.13533e-167	4.15144e-165	372.739
TMEM252	-1.27828	0.410645	-32.5344	1.67168e-167	5.98531e-165	372.353
ABCB5	-1.28551	0.329831	-32.5043	2.82104e-167	9.89438e-165	371.83
SMYD1	-3.02871	0.779853	-32.457	6.41799e-167	2.20599e-164	371.01
MASP1	-1.20495	0.312294	-32.4394	8.72889e-167	2.94147e-164	370.703
PDE2A	-2.7735	2.31064	-32.3796	2.47034e-166	8.16447e-164	369.665
TNMD	-3.45064	1.21792	-32.374	2.72044e-166	8.82143e-164	369.569
CLEC3B	-3.55898	3.54829	-31.897	1.08802e-162	3.46274e-160	361.293
NIPSNAP3B	-2.00817	1.60645	-31.8859	1.32018e-162	4.1252e-160	361.1
TNXB	-3.62844	2.12019	-31.8797	1.46912e-162	4.50862e-160	360.993
ACSM5	-2.28808	1.26235	-31.7654	1.07035e-161	3.22718e-159	359.012
LDLRAD2	-1.21734	0.611258	-31.7504	1.38894e-161	4.11557e-159	358.752
APOB	-1.44965	0.247574	-31.7373	1.74314e-161	5.07756e-159	358.525
NPR1	-3.08673	2.99793	-31.7105	2.77759e-161	7.95595e-159	358.06
ANGPTL7	-2.88875	0.748655	-31.682	4.5533e-161	1.28284e-158	357.567
ATP1A2	-3.60664	1.48433	-31.6516	7.7255e-161	2.14146e-158	357.039
CAVIN2	-4.23764	3.12476	-31.536	5.74797e-160	1.56801e-157	355.037
KY	-1.50283	0.427987	-31.4075	5.34625e-159	1.43564e-156	352.811
PRRG3	-1.81651	0.695693	-31.3829	8.18366e-159	2.16376e-156	352.387
HPSE2	-2.38337	0.783007	-31.3353	1.86808e-158	4.86437e-156	351.563
SCN4A	-2.03918	0.939877	-31.3164	2.59593e-158	6.65875e-156	351.235
MMP11	5.36109	6.96701	31.2583	7.10678e-158	1.79613e-155	350.23
MAP1LC3C	-2.71486	1.29012	-31.2418	9.45431e-158	2.35481e-155	349.945
ADAMTS5	-3.03335	2.60865	-31.0615	2.15387e-156	5.28805e-154	346.826
KLHL31	-2.20985	1.24984	-30.9844	8.19014e-156	1.98248e-153	345.493
CAV1	-3.2814	6.12418	-30.908	3.07903e-155	7.34948e-153	344.172
SLC19A3	-3.75604	1.47695	-30.8721	5.72827e-155	1.34858e-152	343.552
ALDH1A2	-2.15595	1.10267	-30.7001	1.12583e-153	2.61467e-151	340.58
FHL1	-4.15105	4.4146	-30.6682	1.95598e-153	4.48207e-151	340.029
ABCD2	-2.21839	0.939363	-30.5712	1.04705e-152	2.36771e-150	338.355
FRMD1	-1.16951	0.293861	-30.5461	1.6174e-152	3.60994e-150	337.921
ADH4	-1.28164	0.300638	-30.5195	2.56238e-152	5.64579e-150	337.462
ABCA8	-3.33667	1.68567	-30.4762	5.41762e-152	1.17857e-149	336.715
DMD	-2.88942	1.92296	-30.4735	5.67054e-152	1.21817e-149	336.669
ANKRD53	-1.64817	1.10276	-30.4387	1.03511e-151	2.16944e-149	336.069
SLC7A10	-2.8402	0.934826	-30.1884	7.81778e-150	1.61875e-147	331.754
HSPB7	-3.74555	2.22411	-30.1074	3.16619e-149	6.40166e-147	330.358
NEK2	3.42667	4.32409	30.1052	3.28608e-149	6.56681e-147	330.321
TMEM220	-2.09663	2.084	-29.9493	4.84201e-148	9.56492e-146	327.637
PYGM	-1.86428	0.918575	-29.7693	1.07908e-146	2.10739e-144	324.539
GDF10	-2.90167	1.26775	-29.7255	2.29511e-146	4.43188e-144	323.786
FAM13A	-2.11053	2.53949	-29.6147	1.54578e-145	2.95176e-143	321.883
GIPC2	-2.18856	1.39287	-29.5943	2.19732e-145	4.14979e-143	321.532
SPX	-2.40704	0.622406	-29.5762	2.99766e-145	5.59975e-143	321.222
SCN3A	-1.21392	0.408765	-29.5703	3.3213e-145	6.13762e-143	321.12
COL6A6	-2.27905	1.01734	-29.4644	2.05433e-144	3.71639e-142	319.302
HSPB6	-3.73099	2.22881	-29.4411	3.06731e-144	5.49113e-142	318.902
PAFAH1B3	2.4613	6.46008	29.3428	1.66183e-143	2.94435e-141	317.216
PCK1	-3.27978	1.02133	-29.3048	3.19682e-143	5.60618e-141	316.563
NMUR1	-1.80908	0.798779	-29.3007	3.42903e-143	5.95266e-141	316.493
CAV2	-2.78944	4.00666	-29.2651	6.31972e-143	1.08611e-140	315.883
IGSF10	-2.51139	1.24876	-29.2579	7.16095e-143	1.2185e-140	315.758
EBF1	-2.6495	2.9001	-29.2194	1.38585e-142	2.33501e-140	315.1
KLHL29	-2.05629	1.34298	-29.2108	1.60845e-142	2.68377e-140	314.951
MME	-3.72074	3.11476	-29.17	3.23833e-142	5.35133e-140	314.253
COL10A1	5.43776	5.78124	28.9923	6.83626e-141	1.11893e-138	311.21
ADCYAP1R1	-1.97675	1.0978	-28.6791	1.46771e-138	2.37962e-136	305.852
DACT2	-1.69376	0.549495	-28.6013	5.55369e-138	8.92016e-136	304.524
SLC16A7	-2.23602	1.50936	-28.5587	1.15135e-137	1.83214e-135	303.797
KLF15	-2.74162	1.77205	-28.5382	1.63565e-137	2.57892e-135	303.447
CHL1	-2.82869	1.62988	-28.5074	2.76736e-137	4.32363e-135	302.922
CLCA4	-1.70651	0.474484	-28.4915	3.63508e-137	5.62816e-135	302.65
TNS1	-2.72313	5.12966	-28.4161	1.3199e-136	2.00742e-134	301.363
GPIHBP1	-3.40242	2.45188	-28.3984	1.78499e-136	2.69096e-134	301.062
CAPN11	-1.95111	1.20994	-28.3829	2.32416e-136	3.4733e-134	300.799
LRRN4CL	-3.00021	2.08695	-28.3597	3.45469e-136	5.11831e-134	300.403
ADH1C	-3.44239	1.66607	-28.3507	4.02904e-136	5.91821e-134	300.25
B3GALT1	-1.28296	0.386553	-28.282	1.30438e-135	1.89976e-133	299.077
ASF1B	2.77523	5.14657	28.2359	2.86319e-135	4.10057e-133	298.293
PALMD	-2.71393	3.57013	-28.1341	1.62665e-134	2.31039e-132	296.56
COL25A1	-1.30479	0.535991	-28.1184	2.1266e-134	2.99572e-132	296.292
LEPR	-2.61886	2.1815	-28.0382	8.34169e-134	1.15613e-131	294.929
MAMDC2	-3.1199	2.36306	-28.0025	1.5327e-133	2.10727e-131	294.322
LPL	-4.4996	4.628	-27.9252	5.72392e-133	7.80725e-131	293.007
SYNE3	-2.21017	1.93437	-27.8852	1.13101e-132	1.53052e-130	292.327
SGK2	-1.78705	0.931106	-27.8592	1.76058e-132	2.36385e-130	291.886
UBE2C	3.75653	5.89122	27.8387	2.49387e-132	3.32245e-130	291.538
ACADL	-2.14363	0.722945	-27.7923	5.4884e-132	7.25567e-130	290.751
PPARG	-2.85262	2.94474	-27.7663	8.54263e-132	1.12071e-129	290.31
STARD9	-1.58881	1.37115	-27.7618	9.22668e-132	1.20129e-129	290.233
GRIA4	-1.90694	0.564027	-27.7275	1.65372e-131	2.1369e-129	289.651
HCAR2	-2.62039	1.86028	-27.7202	1.87039e-131	2.39884e-129	289.528
CLDN19	-2.31794	0.770805	-27.6939	2.92825e-131	3.72778e-129	289.081
DEFB132	-2.62795	0.928846	-27.6843	3.44364e-131	4.35165e-129	288.919
GSN	-2.36333	7.13877	-27.6359	7.84177e-131	9.83713e-129	288.098
FAM180B	-1.95037	0.684179	-27.5498	3.38699e-130	4.21803e-128	286.638
CKS2	2.49146	7.13393	27.5401	3.99394e-130	4.93812e-128	286.474
PAK5	-1.49553	0.475022	-27.5302	4.72001e-130	5.79415e-128	286.307
ADRB2	-2.65502	2.42745	-27.5279	4.91353e-130	5.98892e-128	286.267
STAB2	-1.12064	0.393375	-27.5167	5.93415e-130	7.182e-128	286.079
IGFBP6	-3.12085	4.60777	-27.5078	6.90015e-130	8.29272e-128	285.928
AOC3	-3.47022	4.64181	-27.504	7.36633e-130	8.79151e-128	285.863
ANGPTL8	-1.9497	0.653686	-27.5033	7.44847e-130	8.82824e-128	285.852
MAB21L1	-2.15222	1.33733	-27.4974	8.24014e-130	9.69966e-128	285.751
ABCA6	-2.02971	1.38516	-27.4446	2.01629e-129	2.35728e-127	284.858
BMX	-2.11337	1.35939	-27.4131	3.4422e-129	3.99714e-127	284.325
EBF3	-2.12381	1.75111	-27.3981	4.43734e-129	5.11813e-127	284.071
ITPRIPL1	-1.98843	1.43297	-27.3931	4.83536e-129	5.54004e-127	283.986
SCN2B	-1.81716	0.775596	-27.32	1.66752e-128	1.89788e-126	282.75
INSYN2B	-2.60449	1.04611	-27.3181	1.72252e-128	1.94758e-126	282.718
KL	-1.91118	1.25628	-27.25	5.46184e-128	6.09527e-126	281.567
CXCL2	-3.75683	2.37695	-27.2359	6.9336e-128	7.6878e-126	281.329
ACACB	-3.00209	3.007	-27.2285	7.86656e-128	8.66633e-126	281.203
DMGDH	-1.50497	1.00659	-27.1974	1.33182e-127	1.44865e-125	280.677
ITGA7	-3.08616	3.01223	-27.1905	1.49636e-127	1.61738e-125	280.561
MYZAP	-2.41936	1.85645	-27.1557	2.69394e-127	2.89363e-125	279.974
FREM1	-2.28697	1.30529	-27.1319	4.02812e-127	4.29983e-125	279.573
ANGPTL1	-2.77736	1.92832	-27.0886	8.38559e-127	8.89598e-125	278.842
PGAP4	-1.64542	1.37566	-27.0722	1.10589e-126	1.166e-124	278.565
FAM13C	-1.54473	1.09238	-27.063	1.29277e-126	1.35473e-124	278.41
UBE2T	2.77907	5.13512	26.9988	3.82927e-126	3.98847e-124	277.326
SORBS1	-3.15605	4.14105	-26.965	6.76888e-126	7.00783e-124	276.758
SIK2	-2.0666	4.17056	-26.9389	1.05258e-125	1.08321e-123	276.317
TK1	2.88035	6.41374	26.9175	1.51131e-125	1.53689e-123	275.956
GPBAR1	-1.51659	0.969978	-26.911	1.68515e-125	1.70359e-123	275.848
LGI4	-1.84379	1.66821	-26.7327	3.41237e-124	3.42953e-122	272.847
GPD1	-5.33162	3.17437	-26.679	8.43845e-124	8.43158e-122	271.943
GNAI1	-1.78499	1.60031	-26.6578	1.20444e-123	1.19651e-121	271.588
TRARG1	-5.00333	2.28174	-26.6428	1.55055e-123	1.53148e-121	271.336
AKR1C1	-3.19877	1.73625	-26.6148	2.48696e-123	2.44233e-121	270.865
AVPR2	-2.14329	1.32474	-26.6025	3.05618e-123	2.9843e-121	270.659
CHRDL1	-4.67795	3.3745	-26.5702	5.2628e-123	5.10997e-121	270.117
SPRY2	-2.64846	3.76568	-26.5447	8.09233e-123	7.81319e-121	269.688
LIPE	-3.83218	3.39621	-26.5324	9.95439e-123	9.55733e-121	269.481
PDE1C	-2.05378	0.998172	-26.5006	1.6992e-122	1.62236e-120	268.948
KIF4A	2.96327	3.88867	26.4996	1.72738e-122	1.64015e-120	268.931
SYN2	-2.25618	1.24	-26.4714	2.77592e-122	2.60694e-120	268.458
KCNB1	-1.76248	0.712897	-26.4301	5.55195e-122	5.18564e-120	267.766
TPX2	3.17033	5.61546	26.3594	1.82077e-121	1.69144e-119	266.581
RYR3	-1.05637	0.525747	-26.2813	6.75598e-121	6.17597e-119	265.273
ADH1B	-5.25537	2.79538	-26.2594	9.76583e-121	8.88019e-119	264.906
VIT	-2.89673	1.83216	-26.1946	2.89366e-120	2.61739e-118	263.822
PCOLCE2	-3.98545	2.16136	-26.1637	4.85805e-120	4.37122e-118	263.305
FMO2	-3.75596	3.01665	-26.1457	6.56879e-120	5.87975e-118	263.004
PAK3	-1.84751	0.958234	-26.0927	1.59556e-119	1.42079e-117	262.119
TMEM100	-2.88028	1.65229	-26.0567	2.91256e-119	2.58017e-117	261.518
CIDEC	-5.42461	2.77394	-26.0497	3.27958e-119	2.8904e-117	261.4
OXTR	-4.0246	3.00151	-26.0411	3.78523e-119	3.31903e-117	261.257
PYCR1	2.39469	6.04688	25.978	1.08847e-118	9.4957e-117	260.203
CDO1	-3.43447	2.85177	-25.965	1.35078e-118	1.17245e-116	259.988
LGALS12	-3.7078	1.81377	-25.9438	1.9254e-118	1.66281e-116	259.634
PPP1R12B	-1.97478	3.2642	-25.9381	2.11991e-118	1.82164e-116	259.538
LDB2	-2.02991	3.22538	-25.8838	5.25022e-118	4.48907e-116	258.633
SVEP1	-2.94485	2.76698	-25.8478	9.57875e-118	8.14953e-116	258.033
HLF	-2.99117	2.17402	-25.7979	2.20423e-117	1.8661e-115	257.202
CORO2B	-2.033	2.06871	-25.7545	4.55111e-117	3.83409e-115	256.479
RERGL	-3.15548	1.62287	-25.7518	4.75647e-117	3.98754e-115	256.435
RBP4	-4.93562	3.36435	-25.6965	1.19583e-116	9.88053e-115	255.515
RELN	-2.07918	0.856757	-25.6751	1.70884e-116	1.40517e-114	255.159
MICU3	-1.66192	1.30433	-25.6586	2.25142e-116	1.84252e-114	254.884
SCN4B	-2.6328	2.58117	-25.6304	3.60376e-116	2.93527e-114	254.414
PTTG1	2.70964	4.85241	25.5883	7.26292e-116	5.88776e-114	253.715
PLIN1	-5.4897	3.70792	-25.5762	8.87377e-116	7.15984e-114	253.515
SPC25	2.22265	3.5752	25.5749	9.07263e-116	7.28609e-114	253.493
KCNJ16	-1.87457	0.485146	-25.5445	1.50603e-115	1.20384e-113	252.988
DNASE1L3	-2.10976	1.23195	-25.5227	2.16372e-115	1.72156e-113	252.626
ADAM33	-2.59728	1.84131	-25.4836	4.14763e-115	3.28485e-113	251.977
GNAL	-1.74465	1.49242	-25.4701	5.19194e-115	4.09306e-113	251.753
PKMYT1	2.63169	3.12217	25.4686	5.32108e-115	4.17571e-113	251.728
CIDEA	-4.22365	1.87428	-25.4682	5.35414e-115	4.18256e-113	251.722
CA3	-3.08023	1.56066	-25.4545	6.72466e-115	5.20586e-113	251.495
GLP2R	-1.03995	0.269521	-25.4109	1.38867e-114	1.07021e-112	250.771
RSPO3	-2.13381	1.60448	-25.4041	1.5534e-114	1.19182e-112	250.66
IQGAP3	2.85723	3.85276	25.3858	2.10517e-114	1.60797e-112	250.356
RBMS3	-1.8792	1.91305	-25.3768	2.44858e-114	1.862e-112	250.206
PFKFB1	-2.41811	1.66538	-25.3532	3.62207e-114	2.74224e-112	249.815
CDK1	2.70535	4.85693	25.3523	3.67309e-114	2.76867e-112	249.801
TSHZ2	-2.48466	2.32053	-25.3142	6.92219e-114	5.17238e-112	249.169
CD36	-4.46713	4.07119	-25.2807	1.20535e-113	8.96756e-112	248.616
DENND2A	-1.87281	2.07235	-25.226	2.99047e-113	2.21527e-111	247.709
NPY2R	-2.51974	0.584737	-25.2122	3.75755e-113	2.77155e-111	247.481
MYH11	-3.6227	3.25664	-25.2084	4.00173e-113	2.93905e-111	247.419
CNTNAP3	-1.25109	0.550258	-25.2057	4.18583e-113	3.06118e-111	247.374
PRRT4	-1.91979	0.828062	-25.2019	4.45891e-113	3.24707e-111	247.311
PLIN4	-5.30259	3.88493	-25.1574	9.32058e-113	6.7304e-111	246.575
CES1	-3.77951	3.21329	-25.1312	1.43749e-112	1.03367e-110	246.143
UHRF1	2.54571	3.51926	25.1239	1.62357e-112	1.16261e-110	246.021
F10	-2.08105	1.82035	-25.1056	2.19494e-112	1.56524e-110	245.721
GYG2	-3.22629	3.84175	-25.0336	7.23486e-112	5.13795e-110	244.531
C2orf88	-2.09955	1.44523	-25.0111	1.04871e-111	7.41693e-110	244.16
TIMP4	-4.24398	2.92299	-24.9978	1.30779e-111	9.21133e-110	243.94
ECRG4	-3.98371	2.26464	-24.9772	1.83731e-111	1.28881e-109	243.601
CFL2	-1.71105	3.73619	-24.9013	6.43977e-111	4.49894e-109	242.35
ZWINT	2.37572	5.56645	24.8826	8.76295e-111	6.09717e-109	242.043
MLXIPL	-2.49878	1.48276	-24.854	1.40596e-110	9.74306e-109	241.571
SAMD5	-2.69986	1.72298	-24.8455	1.61796e-110	1.11672e-108	241.431
USHBP1	-1.3757	1.3471	-24.8239	2.30829e-110	1.58681e-108	241.076
ANGPTL5	-1.09434	0.309884	-24.8138	2.72913e-110	1.86864e-108	240.909
ZBTB16	-3.27189	1.89733	-24.7915	3.9431e-110	2.68913e-108	240.542
LMOD1	-2.80996	4.0062	-24.7754	5.14254e-110	3.49327e-108	240.277
MMP27	-1.14122	0.484073	-24.7424	8.85259e-110	5.98979e-108	239.735
GPLD1	-1.55924	1.03801	-24.7082	1.55594e-109	1.04864e-107	239.173
TMOD1	-2.20714	1.44008	-24.6908	2.07003e-109	1.38967e-107	238.888
GSTM5	-2.60568	1.46156	-24.6886	2.14828e-109	1.43659e-107	238.851
C8orf88	-1.57701	1.16687	-24.6613	3.36441e-109	2.24111e-107	238.403
OVCH2	-1.73615	0.612155	-24.6528	3.87032e-109	2.56816e-107	238.264
CDKN3	2.32586	3.90716	24.6365	5.06535e-109	3.34819e-107	237.995
SLC50A1	1.78135	6.95865	24.6272	5.90211e-109	3.88635e-107	237.843
CCNB1	2.30166	5.83433	24.6156	7.13925e-109	4.68302e-107	237.653
KIF20A	2.84077	4.22817	24.5794	1.2942e-108	8.45706e-107	237.06
BIRC5	3.15539	4.72002	24.5299	2.92383e-108	1.90337e-106	236.247
CD34	-1.99877	4.76507	-24.5261	3.10783e-108	2.01552e-106	236.186
SYNM	-3.88745	3.93629	-24.5247	3.18454e-108	2.0575e-106	236.161
FAM162B	-1.74609	1.69542	-24.5236	3.23931e-108	2.08505e-106	236.144
LIFR	-2.66607	3.40104	-24.5085	4.15087e-108	2.66182e-106	235.897
HBB	-4.05915	3.87144	-24.4992	4.84136e-108	3.09307e-106	235.743
RNF150	-2.49359	2.11264	-24.4548	1.00266e-107	6.38211e-106	235.017
SLC22A3	-2.25277	1.45977	-24.4536	1.02302e-107	6.48767e-106	234.997
KIFC1	2.7115	4.82963	24.3914	2.83607e-107	1.79194e-105	233.98
HAS3	-2.8001	2.08087	-24.373	3.84102e-107	2.41801e-105	233.677
CCDC69	-2.58643	3.97024	-24.3631	4.51489e-107	2.83186e-105	233.516
MTURN	-2.2896	4.43794	-24.3472	5.86148e-107	3.6631e-105	233.256
TACR1	-2.43564	1.47075	-24.3299	7.77988e-107	4.84438e-105	232.973
PLXNA4	-2.27168	1.62209	-24.3213	8.96077e-107	5.55956e-105	232.832
LIMS2	-1.95773	3.06084	-24.2586	2.502e-106	1.54674e-104	231.808
ANGPT1	-2.13131	1.57529	-24.2075	5.76957e-106	3.55397e-104	230.975
GNG11	-2.08487	4.85474	-24.2042	6.08734e-106	3.73632e-104	230.921
FGF2	-2.82751	2.1308	-24.2034	6.17348e-106	3.77571e-104	230.907
HOXA5	-2.67593	2.63588	-24.1863	8.16184e-106	4.95652e-104	230.629
RGS6	-1.21394	0.576002	-24.1806	8.95686e-106	5.42016e-104	230.536
PGM5	-2.43015	2.00603	-24.1699	1.06666e-105	6.43145e-104	230.362
PHYHIP	-1.76687	1.23877	-24.1697	1.07029e-105	6.43145e-104	230.358
CCDC167	1.74868	6.41663	24.1627	1.19971e-105	7.18408e-104	230.244
SHE	-1.79018	2.01487	-24.1567	1.32419e-105	7.90193e-104	230.146
SPC24	2.3244	3.41962	24.1527	1.41399e-105	8.40862e-104	230.081
GALNT15	-2.85669	2.66559	-24.1367	1.83589e-105	1.08798e-103	229.82
POC1A	1.77998	4.09695	24.1243	2.25003e-105	1.32883e-103	229.617
PNMA8C	-1.11708	0.353403	-24.0887	4.02237e-105	2.36741e-103	229.038
CENPM	2.28108	3.77292	24.0723	5.2548e-105	3.08222e-103	228.771
HJURP	2.54683	3.38926	24.06	6.42897e-105	3.7581e-103	228.57
SNCA	-1.15573	0.928864	-24.0501	7.55838e-105	4.38846e-103	228.408
DSC1	-1.15737	0.451377	-24.0484	7.76471e-105	4.49307e-103	228.382
CEP55	2.74226	4.1157	24.0384	9.14374e-105	5.2733e-103	228.219
PLPP3	-1.91702	5.02088	-24.0279	1.08448e-104	6.23339e-103	228.048
CKMT2	-1.81996	1.58105	-24.0227	1.18182e-104	6.77025e-103	227.963
GPX3	-3.3627	5.94368	-23.9894	2.03199e-104	1.16019e-102	227.422
LRRTM2	-1.01465	0.441492	-23.9889	2.04813e-104	1.16554e-102	227.414
PDE11A	-1.03991	0.569928	-23.9742	2.60416e-104	1.47707e-102	227.175
ENPP2	-2.87095	3.90165	-23.9663	2.96484e-104	1.67611e-102	227.045
LRRC70	-1.0283	0.697875	-23.9495	3.89315e-104	2.18652e-102	226.773
CEP112	-1.42477	1.82127	-23.946	4.125e-104	2.30919e-102	226.716
HS3ST4	-1.82193	0.500889	-23.9433	4.31007e-104	2.40496e-102	226.672
ANXA1	-2.58327	6.71327	-23.9124	7.13192e-104	3.96664e-102	226.17
PPP1R1A	-3.8652	2.74895	-23.9072	7.76323e-104	4.30383e-102	226.085
FAM107A	-3.1308	2.31953	-23.8917	9.98776e-104	5.51928e-102	225.834
NUF2	2.71611	3.64797	23.8896	1.03357e-103	5.69324e-102	225.799
DIPK2B	-1.9535	3.51652	-23.8831	1.14836e-103	6.30534e-102	225.694
PLAC9	-2.96536	3.5739	-23.8525	1.89168e-103	1.03536e-101	225.197
PBK	2.77597	4.03476	23.7833	5.82707e-103	3.17918e-101	224.074
ADGRD2	-1.68834	0.375356	-23.7812	6.02672e-103	3.2777e-101	224.041
TOP2A	3.27254	5.70313	23.7232	1.54733e-102	8.38878e-101	223.1
DTL	2.49322	4.03351	23.7128	1.83192e-102	9.90046e-101	222.932
MMRN1	-3.03877	1.98962	-23.6662	3.90322e-102	2.10284e-100	222.177
MEOX2	-2.85677	2.6605	-23.6373	6.241e-102	3.35181e-100	221.709
RRM2	2.7174	3.90357	23.6299	7.03678e-102	3.76742e-100	221.589
ANKRD29	-2.18655	1.77602	-23.6117	9.45151e-102	5.04452e-100	221.295
HCAR3	-1.02087	0.656263	-23.5974	1.19173e-101	6.34089e-100	221.064
HOXA6	-1.68806	0.905487	-23.5609	2.15065e-101	1.14078e-99	220.475
PDE3B	-2.31425	1.58533	-23.5242	3.8995e-101	2.06205e-99	219.882
PDK4	-3.74283	4.76726	-23.4923	6.53083e-101	3.44291e-99	219.367
ADIPOQ	-5.29475	3.00261	-23.4661	9.9849e-101	5.23172e-99	218.944
TAL1	-1.42151	1.43148	-23.4638	1.03607e-100	5.41215e-99	218.907
NTRK2	-3.54079	2.90245	-23.4538	1.21857e-100	6.34617e-99	218.745
CDC20	3.03654	5.34559	23.4345	1.66448e-100	8.61617e-99	218.434
HBA2	-3.452	2.48537	-23.3996	2.92574e-100	1.50996e-98	217.871
PPP1R14A	-2.71154	2.90469	-23.3889	3.47548e-100	1.78831e-98	217.7
CENPF	2.73618	4.56835	23.3809	3.95517e-100	2.02906e-98	217.571
JAM2	-2.10564	3.31986	-23.3699	4.72665e-100	2.41763e-98	217.393
TMEM255A	-1.92672	1.77948	-23.3618	5.39231e-100	2.74992e-98	217.262
ACSS2	-1.42165	4.98381	-23.3384	7.85943e-100	3.99622e-98	216.886
CDC25C	2.04609	2.51345	23.334	8.43959e-100	4.27855e-98	216.815
GPRASP1	-1.93858	2.15825	-23.3167	1.11612e-99	5.64164e-98	216.536
NR3C2	-2.1678	2.23427	-23.3103	1.23817e-99	6.24025e-98	216.432
HOXA2	-1.50188	0.854495	-23.303	1.39291e-99	6.99956e-98	216.315
SEMA3G	-2.72603	4.00957	-23.3024	1.40566e-99	7.04304e-98	216.306
RHOXF1	-1.27675	0.719643	-23.2989	1.48707e-99	7.42928e-98	216.25
SPTBN1	-1.80046	5.84295	-23.2962	1.55436e-99	7.74295e-98	216.206
CCDC3	-2.4278	4.00169	-23.2719	2.29874e-99	1.13851e-97	215.815
FZD4	-2.22477	4.43553	-23.2604	2.76832e-99	1.36714e-97	215.63
RNF186	-1.29446	0.371989	-23.249	3.32278e-99	1.63625e-97	215.448
AKR1C2	-3.52942	2.07494	-23.2337	4.25639e-99	2.09001e-97	215.201
SLC35G2	-1.49025	1.81902	-23.2312	4.42979e-99	2.16896e-97	215.161
GPR17	-1.25511	0.599552	-23.2236	5.00633e-99	2.44428e-97	215.039
ODF3L1	-1.391	0.931999	-23.2203	5.28233e-99	2.57173e-97	214.985
NNAT	-2.78092	2.10859	-23.2154	5.71226e-99	2.77319e-97	214.907
FAM149A	-1.60029	1.62226	-23.2145	5.7955e-99	2.80567e-97	214.893
MYMX	-2.10365	1.35942	-23.2023	7.06277e-99	3.40957e-97	214.696
TRDN	-1.27107	0.278439	-23.1978	7.58164e-99	3.64981e-97	214.625
BHMT2	-2.38484	2.25108	-23.149	1.664e-98	7.98812e-97	213.841
CAT	-1.74108	6.44904	-23.1432	1.8282e-98	8.74414e-97	213.747
TACC3	1.94451	4.0925	23.1431	1.83166e-98	8.74414e-97	213.745
TEDC2	1.96668	2.98892	23.1227	2.54139e-98	1.20987e-96	213.419
NMT2	-1.68086	3.18066	-23.1157	2.84433e-98	1.35035e-96	213.306
DLGAP5	2.5586	3.66585	23.1115	3.04139e-98	1.43993e-96	213.239
PCLAF	1.93231	2.49102	23.105	3.38046e-98	1.59606e-96	213.134
BICDL1	2.22289	3.66611	23.0969	3.84993e-98	1.81274e-96	213.004
TDRD10	-1.40865	0.999335	-23.0844	4.70704e-98	2.21025e-96	212.804
LMNB1	2.28719	5.52785	23.0607	6.88089e-98	3.22221e-96	212.425
GGTA1	-1.96052	2.67962	-23.0373	1.00243e-97	4.68147e-96	212.05
AURKA	2.49789	4.43159	23.0216	1.29036e-97	6.00977e-96	211.798
P2RY12	-2.06374	1.53552	-22.9966	1.92809e-97	8.95573e-96	211.397
HMMR	2.27891	3.29761	22.9845	2.34142e-97	1.08463e-95	211.204
CDCA8	2.46576	4.56945	22.9812	2.46676e-97	1.13962e-95	211.152
HSD17B6	2.02882	2.83359	22.9627	3.32059e-97	1.52996e-95	210.855
NACC1	1.38017	5.90765	22.9581	3.57372e-97	1.64219e-95	210.782
FHL5	-2.1219	1.8335	-22.9363	5.07371e-97	2.32525e-95	210.432
TROAP	2.39961	3.1494	22.9298	5.63236e-97	2.57441e-95	210.328
DST	-2.48543	3.88495	-22.9233	6.25124e-97	2.8497e-95	210.224
CASQ2	-2.2249	1.59598	-22.9221	6.37357e-97	2.89778e-95	210.205
CNN1	-3.34863	4.40834	-22.9012	8.89743e-97	4.0346e-95	209.872
RNASE7	-1.85339	0.834609	-22.9003	9.03097e-97	4.08437e-95	209.857
GHR	-2.79978	3.19477	-22.8804	1.24177e-96	5.60133e-95	209.54
MATN2	-3.10542	3.81164	-22.8687	1.49812e-96	6.73998e-95	209.353
TSPAN7	-2.53027	3.13849	-22.8618	1.67371e-96	7.51028e-95	209.242
ROBO4	-1.67832	3.31829	-22.8329	2.65805e-96	1.18652e-94	208.781
PLK1	2.52057	3.67161	22.8312	2.73111e-96	1.21598e-94	208.754
CPED1	-2.39139	2.52807	-22.8255	2.99074e-96	1.32814e-94	208.663
CACHD1	-2.21186	2.989	-22.823	3.11362e-96	1.37914e-94	208.623
MRAS	-2.2201	4.27288	-22.8163	3.46888e-96	1.53255e-94	208.515
MELK	2.76329	3.9472	22.8107	3.79483e-96	1.67225e-94	208.426
PID1	-2.31323	2.62403	-22.7863	5.60631e-96	2.46419e-94	208.036
SCN3B	-1.1341	0.584606	-22.7854	5.68192e-96	2.49106e-94	208.023
MOCS1	-1.78102	3.50333	-22.784	5.81257e-96	2.54185e-94	208
C10orf90	-1.40806	0.465472	-22.7176	1.68045e-95	7.33001e-94	206.942
LHFPL6	-2.10008	4.81366	-22.7012	2.18318e-95	9.49878e-94	206.68
PEAR1	-1.8909	2.51889	-22.6761	3.26009e-95	1.41485e-93	206.281
EDNRB	-2.19475	2.86593	-22.6649	3.89597e-95	1.68655e-93	206.103
PRKN	-1.04792	0.889335	-22.6439	5.45263e-95	2.3545e-93	205.768
TGFBR2	-2.28152	5.72355	-22.6064	9.91607e-95	4.27112e-93	205.171
ST6GALNAC3	-1.21684	1.21241	-22.596	1.17007e-94	5.01465e-93	205.006
TMEM37	-2.40024	3.9273	-22.5625	1.99471e-94	8.50646e-93	204.474
APCDD1	-2.30581	3.61734	-22.5585	2.12609e-94	9.04432e-93	204.41
RXRG	-1.2033	0.559144	-22.526	3.56559e-94	1.51304e-92	203.895
TCEAL5	-2.15709	1.06936	-22.5236	3.70506e-94	1.56835e-92	203.857
CCNB2	2.49705	4.45854	22.512	4.45888e-94	1.88281e-92	203.672
BUB1	2.42651	3.49206	22.5051	4.97237e-94	2.09449e-92	203.563
TCEAL7	-2.15297	2.59049	-22.5024	5.1937e-94	2.18237e-92	203.52
INMT	-2.34284	2.13488	-22.4845	6.91067e-94	2.89675e-92	203.235
IGF1	-1.52865	1.02714	-22.4745	8.09562e-94	3.38519e-92	203.077
SRPX	-2.68367	4.7196	-22.4732	8.26749e-94	3.44867e-92	203.056
KIF2C	2.56536	4.05075	22.4428	1.34123e-93	5.5812e-92	202.573
G0S2	-3.96675	4.96332	-22.4171	2.01512e-93	8.36517e-92	202.167
CCM2L	-1.35196	1.88888	-22.4139	2.12212e-93	8.78812e-92	202.116
CREB5	-1.6868	1.5843	-22.3966	2.79232e-93	1.15081e-91	201.842
FABP4	-5.8556	5.55699	-22.337	7.19145e-93	2.94969e-91	200.899
S100B	-3.90373	3.1177	-22.3162	1.00035e-92	4.09333e-91	200.57
DMRT2	-1.45303	0.8313	-22.3017	1.25875e-92	5.13845e-91	200.34
BGN	2.32565	9.64554	22.2724	2.00185e-92	8.15256e-91	199.878
PREX2	-1.84009	1.85913	-22.2412	3.28386e-92	1.33419e-90	199.384
RMI2	2.06928	3.71763	22.2106	5.3303e-92	2.16053e-90	198.901
CDCA5	2.46257	4.17956	22.1996	6.34691e-92	2.56654e-90	198.727
NRG2	-1.77782	0.924239	-22.1981	6.49196e-92	2.61903e-90	198.704
CLDN11	-2.61005	2.45806	-22.1858	7.89902e-92	3.17922e-90	198.509
MKI67	2.6784	4.27252	22.1818	8.40962e-92	3.37682e-90	198.446
NDRG2	-2.53752	5.08945	-22.1792	8.76052e-92	3.50952e-90	198.406
MGARP	-1.14766	0.691539	-22.1764	9.16427e-92	3.66273e-90	198.361
ADGRD1	-1.35477	0.849288	-22.1672	1.05962e-91	4.22521e-90	198.216
SSTR1	-1.19225	0.540826	-22.1651	1.09554e-91	4.35831e-90	198.183
PDZD2	-2.21134	2.58302	-22.1629	1.13389e-91	4.50047e-90	198.148
SLC7A3	-1.96254	0.789251	-22.1385	1.66782e-91	6.60443e-90	197.763
CDC14B	-1.62503	2.3819	-22.1374	1.69741e-91	6.70612e-90	197.746
EZH2	1.90675	4.07292	22.1109	2.57945e-91	1.01675e-89	197.329
PI16	-4.22326	2.76103	-22.0989	3.1166e-91	1.22567e-89	197.14
PALM2AKAP2	-1.84102	3.98374	-22.0699	4.92583e-91	1.93277e-89	196.683
PLPP1	-1.77545	5.35261	-22.0668	5.17315e-91	2.02519e-89	196.635
KCNMB1	-2.29901	2.18367	-22.0554	6.19522e-91	2.4198e-89	196.455
SLC35A2	1.24102	5.61463	22.0408	7.79925e-91	3.03941e-89	196.225
METTL7A	-1.83262	5.94171	-22.0207	1.0708e-90	4.16351e-89	195.909
EEPD1	-1.53854	3.20389	-22.0202	1.0789e-90	4.18555e-89	195.902
JPT1	1.95376	6.50532	22.0195	1.09221e-90	4.22764e-89	195.889
FAM126A	-1.838	2.37871	-22.011	1.24799e-90	4.81976e-89	195.756
MTARC1	-1.90324	2.40834	-21.985	1.88131e-90	7.24939e-89	195.347
KCNAB1	-1.40362	1.65504	-21.9588	2.84237e-90	1.09282e-88	194.935
NDC80	2.34316	3.5277	21.9563	2.95351e-90	1.13301e-88	194.897
MAOA	-3.4702	3.48932	-21.9533	3.10043e-90	1.18672e-88	194.849
EBF2	-1.58365	1.54513	-21.9527	3.12948e-90	1.19518e-88	194.84
XPNPEP2	-1.69988	1.02467	-21.9368	4.01977e-90	1.53179e-88	194.59
CCN4	2.67991	3.87501	21.9257	4.78725e-90	1.82021e-88	194.416
FOXO1	-1.73861	3.85169	-21.924	4.91154e-90	1.86335e-88	194.39
GFUS	1.65653	6.55607	21.8709	1.13395e-89	4.29253e-88	193.556
TF	-2.41071	1.1562	-21.8622	1.29975e-89	4.90933e-88	193.42
ATP6V0B	1.29448	7.11967	21.8548	1.45902e-89	5.49884e-88	193.304
RASSF9	-1.76019	1.56275	-21.8441	1.72595e-89	6.49064e-88	193.137
EGFLAM	-1.6747	2.76545	-21.8193	2.55015e-89	9.54832e-88	192.747
IQANK1	2.11439	5.01872	21.7942	3.78188e-89	1.40988e-87	192.354
ANLN	2.65189	4.10562	21.7899	4.04453e-89	1.50453e-87	192.288
SH3D19	-1.84774	4.83854	-21.7848	4.38246e-89	1.62672e-87	192.208
SKA3	2.18516	3.22729	21.781	4.6502e-89	1.72238e-87	192.148
MYCT1	-1.85064	3.52858	-21.7738	5.20892e-89	1.92104e-87	192.035
HOXA7	-1.65707	0.971717	-21.7631	6.1654e-89	2.26892e-87	191.867
CLIC5	-1.65566	1.64096	-21.7615	6.3183e-89	2.32022e-87	191.843
KLHL13	-2.58021	2.11894	-21.7569	6.79177e-89	2.48877e-87	191.771
ALDH1A1	-2.69235	4.66188	-21.7532	7.19504e-89	2.63094e-87	191.713
FAM110D	-1.87008	2.00544	-21.7521	7.31968e-89	2.67083e-87	191.696
GYPC	-1.85506	4.2612	-21.7389	9.00286e-89	3.2711e-87	191.49
ANK2	-1.765	1.75532	-21.7351	9.56361e-89	3.46751e-87	191.429
IL33	-3.33932	3.3114	-21.7229	1.15675e-88	4.18523e-87	191.24
AQP1	-2.34339	6.76458	-21.7197	1.21782e-88	4.39695e-87	191.188
TPM3	1.199	6.77254	21.7014	1.62233e-88	5.84514e-87	190.902
WASF3	-1.8526	2.10674	-21.7007	1.63885e-88	5.89232e-87	190.892
CRYAB	-3.80812	4.85103	-21.6738	2.49789e-88	8.96214e-87	190.472
DTX1	-1.96542	2.422	-21.6559	3.3085e-88	1.17722e-86	190.192
DDR2	-2.32257	4.01629	-21.6282	5.10501e-88	1.8127e-86	189.759
JPH2	-2.1347	1.55494	-21.6234	5.50092e-88	1.94925e-86	189.685
KIF11	2.1357	4.36445	21.5918	9.01714e-88	3.18865e-86	189.192
NRN1	-2.30141	4.18562	-21.5865	9.78805e-88	3.45416e-86	189.11
CTXN1	2.63749	5.54497	21.5797	1.08887e-87	3.8347e-86	189.004
CSRNP3	-1.41972	0.927039	-21.5653	1.36504e-87	4.79744e-86	188.778
PLSCR4	-2.13709	4.10911	-21.5433	1.92428e-87	6.74912e-86	188.436
INHBA	2.73098	4.45537	21.5422	1.95612e-87	6.84683e-86	188.42
SPHKAP	-1.3394	0.343392	-21.4886	4.52002e-87	1.57889e-85	187.584
TXNIP	-2.09474	9.0531	-21.4644	6.59679e-87	2.29964e-85	187.207
COMP	4.03616	5.98493	21.4382	9.91602e-87	3.44973e-85	186.801
PPP4C	1.26078	7.17239	21.4286	1.15129e-86	3.98912e-85	186.652
PROS1	-2.12533	3.85023	-21.4155	1.41311e-86	4.87664e-85	186.448
LSM4	1.30246	6.75331	21.4149	1.42706e-86	4.91493e-85	186.438
MACROH2A1	1.04895	5.30003	21.4079	1.58958e-86	5.46372e-85	186.33
SLIT3	-2.38926	3.43427	-21.4047	1.67048e-86	5.73032e-85	186.281
CLDN5	-2.61341	3.23224	-21.3914	2.05628e-86	7.0397e-85	186.074
TMEM88	-1.87769	2.84554	-21.3798	2.46445e-86	8.4203e-85	185.893
CYYR1	-2.05997	4.32231	-21.356	3.56719e-86	1.21638e-84	185.524
UBE2S	2.02437	4.44227	21.3412	4.49098e-86	1.52836e-84	185.295
AKAP6	-1.03887	0.757676	-21.3391	4.64436e-86	1.57743e-84	185.261
FOXM1	2.67395	4.11562	21.3296	5.38246e-86	1.82452e-84	185.114
CMA1	-2.32687	1.3783	-21.3217	6.08449e-86	2.05843e-84	184.992
EPHB1	-2.03655	1.4298	-21.3131	6.95794e-86	2.3493e-84	184.858
DPT	-3.1759	4.16733	-21.295	9.20919e-86	3.10331e-84	184.579
IQSEC3	-1.14107	0.722935	-21.2934	9.44087e-86	3.17516e-84	184.554
GIMAP8	-1.81386	3.57324	-21.2865	1.05103e-85	3.52792e-84	184.447
TNNT3	-2.24421	1.20588	-21.2798	1.16619e-85	3.90685e-84	184.343
CLEC1A	-1.3684	1.96327	-21.27	1.35806e-85	4.5408e-84	184.191
ARF1	1.02223	9.44504	21.2684	1.3931e-85	4.64883e-84	184.166
CDCA3	2.11473	3.03363	21.2683	1.39579e-85	4.64883e-84	184.164
CKAP2L	2.06797	2.60608	21.2646	1.47649e-85	4.90812e-84	184.108
MEOX1	-2.8877	2.59404	-21.2278	2.61696e-85	8.68245e-84	183.537
RECQL4	2.14217	3.92689	21.2224	2.84513e-85	9.42127e-84	183.454
MCAM	-1.82384	5.73094	-21.2139	3.24726e-85	1.07322e-83	183.322
AOC2	-1.38229	1.18597	-21.2087	3.51861e-85	1.16067e-83	183.242
PAQR4	2.03793	3.98757	21.2083	3.54235e-85	1.16626e-83	183.235
AURKB	2.5323	3.79157	21.2003	4.00616e-85	1.31644e-83	183.113
RUSC1	1.37869	5.32002	21.183	5.2429e-85	1.71955e-83	182.844
RUNX1T1	-1.36897	1.3994	-21.1766	5.78483e-85	1.89368e-83	182.746
ITM2A	-2.71551	4.93241	-21.1712	6.29023e-85	2.05521e-83	182.663
CDKN1C	-2.13924	4.19798	-21.1586	7.6454e-85	2.49324e-83	182.468
FAM83H	1.87765	6.16116	21.1303	1.18512e-84	3.85748e-83	182.031
SPAG5	2.15818	3.94189	21.1298	1.19447e-84	3.88055e-83	182.023
NUAK2	1.7641	3.39378	21.1151	1.5014e-84	4.86849e-83	181.795
KIF18B	2.25224	2.80856	21.1131	1.54665e-84	5.0058e-83	181.766
KLF4	-2.46515	4.69527	-21.0929	2.11426e-84	6.83001e-83	181.454
KANK1	-1.83126	3.69202	-21.0784	2.64619e-84	8.53237e-83	181.23
CENPU	1.99809	4.33067	21.0431	4.56628e-84	1.46959e-82	180.686
NSG1	-2.12638	1.30803	-21.0116	7.42936e-84	2.38656e-82	180.201
GTSE1	2.13578	3.09727	21.0092	7.71086e-84	2.47237e-82	180.164
SOX17	-1.84942	2.528	-21.007	7.978e-84	2.55326e-82	180.13
SYNPO2	-2.48507	3.12308	-20.9754	1.2997e-83	4.15178e-82	179.643
NUDT7	-1.21233	1.53563	-20.9683	1.44974e-83	4.6225e-82	179.534
RAD51	1.89856	3.24908	20.9537	1.81856e-83	5.78773e-82	179.308
ROBO3	-1.48762	1.5647	-20.9217	2.97596e-83	9.45377e-82	178.817
F8	-1.51866	2.83041	-20.9141	3.34455e-83	1.06051e-81	178.701
FOSB	-3.99781	4.24649	-20.9102	3.55162e-83	1.12409e-81	178.641
HTR2A	-1.04542	0.430862	-20.9065	3.76125e-83	1.18825e-81	178.584
EXO1	2.34395	3.16825	20.8978	4.29895e-83	1.35315e-81	178.451
LRFN5	-1.10345	0.651252	-20.8932	4.6186e-83	1.4511e-81	178.379
EFCAB1	-1.32595	0.593401	-20.8688	6.72002e-83	2.10707e-81	178.005
CDK5	1.27288	4.81108	20.8687	6.73096e-83	2.10707e-81	178.003
EMCN	-1.97135	3.54667	-20.8489	9.12873e-83	2.85248e-81	177.7
KIF23	2.02552	3.57703	20.8448	9.72588e-83	3.03356e-81	177.637
EPAS1	-1.85749	6.20594	-20.8331	1.16524e-82	3.62786e-81	177.456
AADAC	-1.87336	0.578118	-20.7885	2.31154e-82	7.17077e-81	176.773
AKAP12	-2.48605	3.73146	-20.7882	2.32214e-82	7.1907e-81	176.769
PER1	-2.14227	4.1662	-20.7794	2.65969e-82	8.22112e-81	176.633
CCNF	1.49021	3.72207	20.779	2.67727e-82	8.26061e-81	176.627
MYBL2	3.21052	5.20208	20.7784	2.70163e-82	8.32082e-81	176.618
MMD	-2.03423	4.43566	-20.7628	3.43018e-82	1.05458e-80	176.38
SAA2	-3.09666	2.03651	-20.7285	5.80919e-82	1.77962e-80	175.855
FAM89A	-2.08583	2.80832	-20.7249	6.14455e-82	1.87901e-80	175.799
H2AX	1.72138	6.14101	20.7002	8.97083e-82	2.73841e-80	175.421
GINS1	1.94873	3.74047	20.698	9.27716e-82	2.8269e-80	175.388
SMIM10L2A	-1.92682	1.5881	-20.6831	1.16648e-81	3.54817e-80	175.159
MMRN2	-1.86959	4.59747	-20.6781	1.25908e-81	3.82307e-80	175.083
SOX7	-1.64154	2.4224	-20.6763	1.2936e-81	3.92096e-80	175.056
FGF1	-2.19205	3.32782	-20.6498	1.94192e-81	5.87567e-80	174.651
S1PR1	-2.01295	3.99641	-20.6491	1.96489e-81	5.93471e-80	174.64
CCNA2	2.36756	4.26416	20.6438	2.13029e-81	6.42302e-80	174.559
ADCY4	-1.62763	2.37756	-20.6262	2.78842e-81	8.3926e-80	174.291
FGFBP2	-2.56649	1.33555	-20.6187	3.1287e-81	9.40032e-80	174.176
BUB1B	2.1632	3.31555	20.6129	3.41807e-81	1.02518e-79	174.088
ASPM	2.3336	2.97273	20.5949	4.50247e-81	1.34807e-79	173.813
LTBP4	-1.86667	4.43737	-20.5569	8.04591e-81	2.40064e-79	173.234
HBA1	-1.13148	0.340544	-20.5534	8.48959e-81	2.52863e-79	173.181
ABCB1	-1.80936	1.81341	-20.5317	1.18357e-80	3.51916e-79	172.849
FAM83D	2.68838	4.08144	20.5215	1.38328e-80	4.10588e-79	172.694
CD209	-1.8558	1.49352	-20.5119	1.60159e-80	4.74567e-79	172.548
TGFBR3	-3.04757	4.03055	-20.4942	2.09789e-80	6.20558e-79	172.279
RABIF	1.09885	4.81994	20.4719	2.95038e-80	8.71223e-79	171.939
PROX1	-1.5875	0.971829	-20.4563	3.74214e-80	1.10124e-78	171.702
ACO1	-1.48374	4.6121	-20.4455	4.40954e-80	1.29542e-78	171.538
MYLK	-2.3976	4.01979	-20.4206	6.44947e-80	1.88826e-78	171.159
SH3BGRL2	-2.0923	3.84011	-20.4179	6.72066e-80	1.96431e-78	171.118
SEMA3D	-1.91835	1.48655	-20.4065	7.99538e-80	2.33291e-78	170.945
GPC3	-3.40771	4.19116	-20.3982	9.07114e-80	2.63784e-78	170.819
CHST9	-1.6317	0.789484	-20.3932	9.77983e-80	2.83912e-78	170.744
WDR62	1.61833	2.24808	20.3887	1.04768e-79	3.03633e-78	170.675
CRB3	1.71528	4.87281	20.3554	1.73923e-79	5.03205e-78	170.17
ARHGEF15	-1.6588	3.27178	-20.348	1.94713e-79	5.62411e-78	170.057
TRIM11	1.18446	3.70849	20.3126	3.33725e-79	9.62316e-78	169.52
MRGPRF	-1.90961	2.29301	-20.3014	3.95232e-79	1.13777e-77	169.351
NUP210	1.89804	5.57399	20.2946	4.38241e-79	1.25947e-77	169.248
CCDC50	-1.18895	4.72044	-20.2808	5.40566e-79	1.55095e-77	169.039
TMTC1	-2.46663	2.60466	-20.2461	9.15681e-79	2.6141e-77	168.514
SLC25A27	-2.00547	1.97844	-20.2392	1.01738e-78	2.8996e-77	168.409
BMP2	-1.84474	1.52846	-20.2378	1.03894e-78	2.95615e-77	168.388
TLCD1	1.97106	4.49922	20.2282	1.20223e-78	3.41512e-77	168.242
SOX12	1.65141	5.19862	20.2137	1.49582e-78	4.22816e-77	168.025
TRIM59	1.35926	2.53783	20.2136	1.50009e-78	4.23325e-77	168.022
MARCKSL1	1.61831	9.51318	20.2122	1.53099e-78	4.31337e-77	168.001
PIK3C2G	-2.41311	1.44842	-20.2113	1.552e-78	4.3654e-77	167.988
CLMP	-2.23558	4.34138	-20.2006	1.82671e-78	5.12972e-77	167.825
TP53AIP1	-1.41027	0.793855	-20.1996	1.85267e-78	5.19411e-77	167.811
LILRB5	-1.67215	1.35994	-20.1959	1.96044e-78	5.48731e-77	167.755
SKA1	2.14825	2.9316	20.1813	2.44633e-78	6.83621e-77	167.534
KIT	-3.27881	3.98168	-20.1647	3.1439e-78	8.77128e-77	167.284
TMEM178A	-1.80126	1.74818	-20.1604	3.35765e-78	9.35244e-77	167.218
PTH1R	-1.75434	1.70247	-20.1451	4.23188e-78	1.17495e-76	166.988
HOXA3	-1.51612	1.30462	-20.1423	4.41772e-78	1.22456e-76	166.945
GABARAPL1	-1.46625	5.26232	-20.1332	5.07003e-78	1.40312e-76	166.808
RUNDC3B	-1.22945	1.25994	-20.1317	5.18358e-78	1.43223e-76	166.786
GFAP	-1.07553	0.43383	-20.128	5.48336e-78	1.51263e-76	166.729
NCAPG	2.16268	3.21236	20.1214	6.05599e-78	1.66792e-76	166.63
IL11RA	-1.45519	2.78893	-20.1138	6.79823e-78	1.86935e-76	166.515
WDR86	-1.82801	1.67076	-20.0962	8.86296e-78	2.43321e-76	166.251
COL11A1	4.18116	4.83399	20.0927	9.35413e-78	2.56396e-76	166.197
POLR3K	1.39209	5.50461	20.0817	1.10482e-77	3.01389e-76	166.031
CYRIA	-1.63525	3.15125	-20.0729	1.26121e-77	3.43506e-76	165.899
ADGRF5	-1.77137	4.306	-20.0714	1.29021e-77	3.50847e-76	165.876
SLC52A2	1.60595	5.62447	20.0589	1.55745e-77	4.2285e-76	165.689
ESM1	2.14548	3.35617	20.0517	1.7372e-77	4.70908e-76	165.58
ADGRL3	-1.35356	0.714036	-20.0479	1.83986e-77	4.97949e-76	165.523
CAVIN1	-1.89526	7.94752	-20.0315	2.35748e-77	6.37038e-76	165.276
CCT3	1.16149	8.52546	20.0182	2.88183e-77	7.77507e-76	165.075
TMEM273	-1.68824	2.70512	-19.9979	3.91523e-77	1.05466e-75	164.77
NCAPH	1.92808	2.97424	19.9944	4.12272e-77	1.10881e-75	164.718
CFL1	1.02063	8.50826	19.9905	4.37438e-77	1.17466e-75	164.659
E2F1	2.16489	4.43989	19.9573	7.21674e-77	1.93188e-75	164.16
MAP7D3	-1.61663	2.44139	-19.9447	8.72346e-77	2.33159e-75	163.971
RGN	-2.03023	1.51128	-19.9426	8.99844e-77	2.40136e-75	163.94
NAT8L	-2.59898	2.44226	-19.9269	1.13985e-76	3.03712e-75	163.705
THSD1	-1.36442	2.64044	-19.9117	1.43365e-76	3.81404e-75	163.476
PRR19	1.16239	2.07074	19.9031	1.63211e-76	4.33531e-75	163.347
ERG	-1.57426	3.01046	-19.8928	1.90436e-76	5.05066e-75	163.193
MAML2	-2.05994	3.53077	-19.8631	2.97932e-76	7.88946e-75	162.747
DGAT2	-2.68157	3.33339	-19.85	3.62651e-76	9.5885e-75	162.551
KIF22	1.34541	5.30633	19.8439	3.97169e-76	1.0485e-74	162.46
NTF4	-1.50294	0.811669	-19.8324	4.72042e-76	1.24425e-74	162.288
AKR1C3	-2.45667	3.6688	-19.8192	5.75542e-76	1.51474e-74	162.09
DYNC2I2	1.51681	6.7191	19.8181	5.85804e-76	1.53939e-74	162.073
CX3CL1	-2.81582	4.90708	-19.8132	6.30336e-76	1.65389e-74	162
SBK1	2.09238	4.41787	19.812	6.41486e-76	1.68058e-74	161.982
SOBP	-1.35628	1.55783	-19.81	6.61233e-76	1.72967e-74	161.952
SDS	2.01427	3.44128	19.808	6.81248e-76	1.77932e-74	161.922
MEIS2	-1.43749	1.79281	-19.7947	8.32303e-76	2.17056e-74	161.723
PLEKHM3	-1.38034	2.34064	-19.7908	8.81665e-76	2.2958e-74	161.665
CTHRC1	2.45403	7.04488	19.7892	9.03414e-76	2.34888e-74	161.641
LAGE3	1.68948	6.39287	19.7497	1.63382e-75	4.23512e-74	161.05
GPRIN1	1.84108	2.72629	19.7356	2.01773e-75	5.22239e-74	160.84
EDN3	-2.49774	1.0477	-19.7335	2.08135e-75	5.37896e-74	160.809
NAXE	1.23884	7.65526	19.702	3.33959e-75	8.61775e-74	160.338
ADAMTS1	-2.45016	4.43616	-19.6976	3.56448e-75	9.18429e-74	160.273
CDH23	-1.22481	1.14736	-19.6968	3.6088e-75	9.28455e-74	160.26
H2AZ1	1.33751	7.59238	19.6941	3.75536e-75	9.64719e-74	160.221
NRG1	-1.55605	0.911948	-19.687	4.17766e-75	1.0716e-73	160.114
COX7A1	-2.29247	5.08832	-19.6559	6.64748e-75	1.70259e-73	159.651
PLPPR1	-1.21229	0.539807	-19.6551	6.72738e-75	1.72049e-73	159.639
CEP68	-1.15482	3.93791	-19.6468	7.62418e-75	1.94405e-73	159.515
CDC45	2.11175	3.26458	19.6377	8.73587e-75	2.22422e-73	159.379
TLN2	-1.52699	3.10528	-19.63	9.79137e-75	2.48927e-73	159.265
PTGFR	-1.86283	1.26868	-19.614	1.24397e-74	3.15787e-73	159.027
PENK	-1.64682	0.599232	-19.6115	1.2916e-74	3.27396e-73	158.989
ISM1	-2.41827	3.50681	-19.5879	1.83627e-74	4.64773e-73	158.639
BMP6	-1.83605	2.07193	-19.5692	2.42899e-74	6.12991e-73	158.36
NATD1	-1.53692	3.77727	-19.5628	2.67118e-74	6.73121e-73	158.265
ACSL1	-2.28156	5.84142	-19.5551	2.99464e-74	7.53526e-73	158.151
WSCD1	-1.13896	1.03806	-19.5459	3.43718e-74	8.63616e-73	158.014
ALX4	-2.00092	1.15375	-19.5378	3.87951e-74	9.73333e-73	157.893
CADM3	-1.91482	1.20509	-19.519	5.13279e-74	1.28589e-72	157.614
NR3C1	-1.71241	4.50348	-19.5187	5.15368e-74	1.28925e-72	157.61
CENPA	2.22934	3.25048	19.5089	5.96193e-74	1.48927e-72	157.465
SOD3	-2.66428	4.48804	-19.5065	6.18118e-74	1.5418e-72	157.429
FERMT2	-1.72043	4.42163	-19.4956	7.26857e-74	1.8104e-72	157.267
LURAP1	-1.0021	1.06038	-19.4876	8.18668e-74	2.03318e-72	157.149
FLAD1	1.12546	5.68155	19.4849	8.53023e-74	2.11545e-72	157.108
RGCC	-1.54462	6.02348	-19.48	9.17288e-74	2.27154e-72	157.035
ESRP1	1.91645	6.61944	19.4798	9.20427e-74	2.27604e-72	157.032
RHOJ	-1.64775	3.62458	-19.4764	9.6838e-74	2.39118e-72	156.981
EGFR	-2.74764	3.34786	-19.4759	9.74428e-74	2.40266e-72	156.975
AP1S1	1.18593	6.69299	19.4755	9.80309e-74	2.4137e-72	156.969
GJB2	3.30921	4.84871	19.4712	1.04606e-73	2.57189e-72	156.904
SAMD1	1.0565	6.209	19.4706	1.05541e-73	2.59119e-72	156.895
LLGL2	1.71248	5.22818	19.4641	1.1625e-73	2.85004e-72	156.799
BMPER	-1.35578	0.701259	-19.437	1.73942e-73	4.2523e-72	156.397
TFPI	-1.8864	2.59721	-19.428	1.98634e-73	4.84904e-72	156.265
LAMTOR2	1.29854	7.05442	19.4155	2.39362e-73	5.8326e-72	156.079
ERCC6L	1.70881	2.40523	19.4154	2.39603e-73	5.8326e-72	156.078
LRRN3	-1.8376	1.3854	-19.406	2.75772e-73	6.70356e-72	155.938
GABRE	-2.37068	1.63298	-19.394	3.29435e-73	7.99671e-72	155.761
PLPP4	2.43592	2.50513	19.3905	3.46695e-73	8.39198e-72	155.71
PELI2	-1.7084	2.42889	-19.3894	3.52524e-73	8.52106e-72	155.693
ABCC9	-1.65412	2.11868	-19.354	5.96404e-73	1.43958e-71	155.169
C1QTNF6	1.80706	4.07062	19.3516	6.17771e-73	1.48906e-71	155.134
SGCG	-2.37734	1.1358	-19.3372	7.64534e-73	1.84023e-71	154.922
TBX15	-1.73735	2.63942	-19.335	7.89798e-73	1.89839e-71	154.889
DDX39A	1.31184	5.67543	19.3327	8.18035e-73	1.96351e-71	154.854
CFD	-3.4361	5.63082	-19.3207	9.76828e-73	2.34139e-71	154.677
SAA1	-4.49726	6.37003	-19.3055	1.22438e-72	2.93067e-71	154.452
ITSN1	-1.25649	3.07139	-19.284	1.68239e-72	4.02135e-71	154.135
PCDHGB7	-1.50851	1.77067	-19.2798	1.78996e-72	4.27253e-71	154.074
CNRIP1	-1.503	3.21226	-19.266	2.19694e-72	5.23669e-71	153.869
TMED3	1.27157	4.82713	19.2622	2.32413e-72	5.5322e-71	153.813
KPNA2	1.83572	5.84054	19.2589	2.4404e-72	5.80092e-71	153.765
GNG2	-1.64408	3.19784	-19.2571	2.50421e-72	5.94299e-71	153.739
ECM2	-2.26605	3.96278	-19.257	2.50708e-72	5.94299e-71	153.738
LSR	1.58428	7.23239	19.2532	2.65444e-72	6.28365e-71	153.681
VWF	-1.93134	5.85218	-19.2518	2.71102e-72	6.40875e-71	153.66
RHOQ	-1.20899	4.8338	-19.224	4.08649e-72	9.6338e-71	153.251
PITX1	3.15202	4.13223	19.208	5.17887e-72	1.21923e-70	153.015
THSD7B	-1.24299	0.931573	-19.2037	5.51433e-72	1.29643e-70	152.952
HAGHL	2.01786	2.59768	19.1939	6.37571e-72	1.4969e-70	152.807
VSIR	-1.65589	4.34475	-19.1937	6.39642e-72	1.49971e-70	152.804
EOGT	-1.34359	3.92034	-19.1925	6.50846e-72	1.5239e-70	152.787
EGR1	-3.02127	7.61092	-19.1909	6.66684e-72	1.55886e-70	152.763
SNRNP25	1.27926	5.76382	19.1711	8.92451e-72	2.08392e-70	152.472
TTC28	-1.37825	2.86681	-19.167	9.4835e-72	2.21144e-70	152.412
DNAJB4	-1.40162	4.25913	-19.1346	1.52977e-71	3.56241e-70	151.935
NEIL3	1.70437	2.03017	19.1114	2.15231e-71	4.99859e-70	151.595
PLCXD3	-1.25705	0.647646	-19.1051	2.36375e-71	5.48224e-70	151.501
SPAAR	-1.57787	1.26052	-19.0966	2.6774e-71	6.19845e-70	151.377
EZH1	-1.25795	4.36049	-19.0965	2.67977e-71	6.19845e-70	151.376
HDGF	1.14789	8.53051	19.0803	3.40557e-71	7.86669e-70	151.138
AASS	-1.62772	2.73831	-19.0571	4.78979e-71	1.10493e-69	150.798
AOX1	-2.4025	2.62599	-19.0468	5.56804e-71	1.28102e-69	150.648
ELMOD3	-1.0722	3.63549	-19.0369	6.4473e-71	1.48133e-69	150.501
KLF9	-1.68237	5.0879	-19.0303	7.09874e-71	1.62882e-69	150.405
PDE7B	-1.22116	1.51282	-19.0252	7.65706e-71	1.75459e-69	150.33
TNFRSF10D	-1.7047	2.02216	-19.0185	8.44815e-71	1.93329e-69	150.232
CSRNP1	-1.7013	5.4226	-19.0041	1.04328e-70	2.38428e-69	150.022
FFAR4	-1.10085	1.20836	-18.9914	1.25748e-70	2.87e-69	149.836
FOXN3	-1.48669	3.92318	-18.9855	1.37073e-70	3.12431e-69	149.75
KNL1	1.66764	2.27934	18.9843	1.39611e-70	3.17795e-69	149.731
UGP2	-1.07555	6.01632	-18.9722	1.6674e-70	3.79046e-69	149.554
CYP2U1	-1.31007	2.75952	-18.9716	1.68198e-70	3.81856e-69	149.546
FAM111B	2.32444	3.97689	18.9686	1.75709e-70	3.98382e-69	149.502
HYAL1	-1.51881	1.8564	-18.9606	1.97688e-70	4.47624e-69	149.385
PYCR3	1.5541	4.63581	18.9565	2.10024e-70	4.7493e-69	149.324
ESPL1	1.81032	2.706	18.9436	2.53675e-70	5.72885e-69	149.136
MRPL14	1.21709	7.25085	18.9363	2.82304e-70	6.36703e-69	149.03
FAT2	-2.28047	1.54858	-18.9288	3.15215e-70	7.09068e-69	148.92
BMP8A	1.72564	2.64009	18.898	4.94974e-70	1.11053e-68	148.47
DEPP1	-2.23758	6.23615	-18.8887	5.67213e-70	1.27094e-68	148.334
PLAGL1	-1.79274	2.53096	-18.8837	6.10018e-70	1.36507e-68	148.262
GABRD	1.32329	1.52021	18.8792	6.5178e-70	1.45663e-68	148.196
FAXDC2	-2.41433	3.42534	-18.8723	7.20431e-70	1.60796e-68	148.096
SV2B	-1.02705	0.718166	-18.8322	1.29606e-69	2.88898e-68	147.511
PDGFD	-2.05661	4.20949	-18.8316	1.30777e-69	2.91132e-68	147.502
FN1	2.75236	9.19486	18.831	1.31773e-69	2.92969e-68	147.494
DEPDC1B	1.74663	2.36981	18.8251	1.43799e-69	3.19293e-68	147.407
EHD2	-1.77388	6.46465	-18.8056	1.91096e-69	4.23766e-68	147.124
ANTXR2	-1.55491	3.79995	-18.801	2.04397e-69	4.52677e-68	147.057
CSN1S1	-2.35731	0.574708	-18.7997	2.08389e-69	4.60923e-68	147.037
ABCA5	-1.47203	2.54396	-18.7896	2.41479e-69	5.32742e-68	146.89
MRPS34	1.32226	7.44849	18.786	2.54544e-69	5.60846e-68	146.838
TMEM63B	1.21195	5.87153	18.7651	3.4495e-69	7.59067e-68	146.535
PGP	1.17116	4.20379	18.7553	3.97996e-69	8.74676e-68	146.392
NECTIN3	-1.32835	1.57345	-18.749	4.36739e-69	9.58595e-68	146.3
CBX7	-1.57785	3.68103	-18.7415	4.86914e-69	1.06736e-67	146.191
SLC25A22	1.36726	4.55625	18.7382	5.10822e-69	1.11756e-67	146.144
RBP7	-2.42443	5.20754	-18.7382	5.11114e-69	1.11756e-67	146.143
ICAM2	-1.28644	2.4311	-18.7301	5.75258e-69	1.25621e-67	146.025
DPP3	1.35843	5.48006	18.7289	5.85285e-69	1.27649e-67	146.008
PTPRB	-1.64075	2.69888	-18.7172	6.94384e-69	1.51059e-67	145.838
ECSCR	-1.2977	1.97685	-18.7158	7.08269e-69	1.53885e-67	145.818
CELF2	-1.81695	3.36515	-18.7156	7.10626e-69	1.54202e-67	145.815
TRMT9B	-1.51457	1.18269	-18.7139	7.2784e-69	1.57738e-67	145.791
SHCBP1	1.72243	2.63981	18.7066	8.09491e-69	1.75213e-67	145.685
MT1M	-2.57805	3.23719	-18.6958	9.48243e-69	2.0473e-67	145.527
HMGB3	2.03035	5.69159	18.6853	1.1049e-68	2.38253e-67	145.375
ADHFE1	-1.20962	1.35708	-18.684	1.12533e-68	2.42355e-67	145.357
PACC1	1.18266	3.99393	18.6703	1.3736e-68	2.95453e-67	145.158
RAB25	1.9508	7.67881	18.6691	1.39879e-68	3.00494e-67	145.14
PIMREG	1.99488	2.84169	18.6687	1.40677e-68	3.01833e-67	145.134
SLC16A12	-1.18377	0.540414	-18.6646	1.49142e-68	3.19594e-67	145.076
CNTFR	-3.10384	2.53384	-18.6499	1.84878e-68	3.95679e-67	144.862
AP1M2	1.97625	7.16347	18.6426	2.05485e-68	4.38692e-67	144.757
TNS2	-1.57023	5.09331	-18.6401	2.1301e-68	4.54192e-67	144.721
IRX6	-1.93419	1.27943	-18.626	2.61743e-68	5.57412e-67	144.515
PCDH9	-1.05325	0.387008	-18.6184	2.91919e-68	6.20906e-67	144.407
FLRT2	-1.30391	1.27163	-18.6068	3.45774e-68	7.34545e-67	144.238
NDN	-1.89495	4.59143	-18.6053	3.53395e-68	7.49808e-67	144.216
SPRY1	-1.99348	5.00624	-18.598	3.92835e-68	8.32461e-67	144.111
CDT1	2.06562	3.98473	18.5924	4.25798e-68	9.01203e-67	144.03
MBOAT7	1.3383	6.21712	18.5892	4.46257e-68	9.43343e-67	143.984
ZNF366	-1.16146	1.23511	-18.5784	5.21751e-68	1.10157e-66	143.828
HNRNPAB	1.0275	7.86711	18.574	5.56166e-68	1.17279e-66	143.764
EEF1AKMT4	1.62857	3.94557	18.5635	6.48474e-68	1.36577e-66	143.611
FBXL6	1.42811	4.07051	18.5616	6.65821e-68	1.40059e-66	143.585
SQLE	2.06196	5.9079	18.559	6.91785e-68	1.45343e-66	143.547
NECAB1	-1.38617	0.918265	-18.556	7.22557e-68	1.51622e-66	143.503
SSPN	-1.71195	3.75061	-18.5551	7.32096e-68	1.53437e-66	143.49
RAPGEF3	-1.54521	2.31682	-18.5449	8.48222e-68	1.77558e-66	143.344
TIMM17A	1.06168	6.1995	18.5402	9.0897e-68	1.90043e-66	143.275
NOTCH4	-1.38068	3.19067	-18.5346	9.85255e-68	2.05742e-66	143.194
MANF	1.04728	6.62147	18.5233	1.16005e-67	2.4195e-66	143.032
FAT4	-1.43236	1.53891	-18.5221	1.18151e-67	2.46126e-66	143.013
CXCL3	-1.19084	0.718093	-18.5184	1.24539e-67	2.59119e-66	142.961
RHPN1	2.01859	4.86537	18.487	1.96374e-67	4.08088e-66	142.507
CSF3	-1.21427	0.329743	-18.4605	2.88081e-67	5.97943e-66	142.125
LARP6	-1.55953	2.77443	-18.4598	2.90822e-67	6.02904e-66	142.116
H2BC5	2.45749	6.71354	18.4533	3.19595e-67	6.61753e-66	142.022
STX11	-1.45901	2.15814	-18.4367	4.06312e-67	8.40298e-66	141.782
DAAM2	-1.50022	2.25158	-18.4316	4.36978e-67	9.0179e-66	141.71
IL17B	-2.04902	1.29249	-18.4316	4.37095e-67	9.0179e-66	141.71
RBMS2	-1.09652	4.09369	-18.426	4.74223e-67	9.77218e-66	141.628
ARHGAP39	1.4983	4.09808	18.4255	4.77299e-67	9.82378e-66	141.622
PTPN14	-1.71976	3.50395	-18.4235	4.91617e-67	1.01064e-65	141.593
LOXL4	-2.30415	2.51806	-18.4196	5.19787e-67	1.06727e-65	141.537
SAMD4A	-1.42226	2.44302	-18.4143	5.61675e-67	1.1519e-65	141.46
TWIST2	-2.02129	2.91963	-18.3966	7.2472e-67	1.48274e-65	141.206
TRIP13	1.94318	4.00308	18.3747	9.93743e-67	2.03073e-65	140.891
FBLN5	-2.00927	5.02545	-18.3637	1.16513e-66	2.37532e-65	140.733
SGO1	1.60631	1.99066	18.3552	1.31585e-66	2.67942e-65	140.611
RPUSD1	1.2565	5.04839	18.3292	1.91362e-66	3.88741e-65	140.238
KANK3	-1.46827	1.86563	-18.3201	2.18305e-66	4.4295e-65	140.107
SMIM10	-1.46054	3.09604	-18.3186	2.22912e-66	4.51766e-65	140.086
DOCK11	-1.80759	3.40484	-18.3176	2.26361e-66	4.58214e-65	140.071
PLA2G4A	-2.04071	2.60319	-18.3171	2.27847e-66	4.6068e-65	140.064
TYRO3	-1.34502	2.26229	-18.3088	2.56728e-66	5.18464e-65	139.945
FAM189A2	-2.24001	2.33358	-18.2952	3.12339e-66	6.29406e-65	139.75
RGL1	-1.5332	4.08429	-18.2952	3.12396e-66	6.29406e-65	139.75
FEN1	1.43517	5.74531	18.2321	7.73124e-66	1.55402e-64	138.847
HGH1	1.28923	5.67156	18.1884	1.44817e-65	2.90074e-64	138.221
EMP1	-1.82889	6.23374	-18.1793	1.65061e-65	3.30237e-64	138.091
LRRC15	3.17334	5.3817	18.1709	1.86192e-65	3.72081e-64	137.971
NPR2	-1.5061	2.83847	-18.1666	1.97864e-65	3.94948e-64	137.91
RECK	-1.6927	3.39051	-18.1545	2.35398e-65	4.68777e-64	137.737
SLC10A6	-1.36276	1.21771	-18.1489	2.54996e-65	5.07219e-64	137.658
SFRP1	-4.53219	5.27636	-18.1093	4.49325e-65	8.92727e-64	137.093
HADH	-1.06064	4.58141	-18.1018	5.00746e-65	9.92598e-64	136.985
MEDAG	-2.19178	3.48768	-18.0901	5.91921e-65	1.17063e-63	136.819
MGLL	-2.02086	4.52028	-18.0886	6.04818e-65	1.19476e-63	136.797
PDLIM3	-1.98251	3.28394	-18.0858	6.29101e-65	1.2413e-63	136.758
LHX6	-1.52102	2.11652	-18.0749	7.34924e-65	1.44844e-63	136.603
PECAM1	-1.55688	6.21947	-18.0711	7.7637e-65	1.52837e-63	136.548
RACGAP1	1.62846	4.96548	18.0555	9.69387e-65	1.90181e-63	136.327
TOMM40	1.12748	5.80664	18.0545	9.84337e-65	1.92894e-63	136.312
GRK3	-1.41851	3.67625	-18.0367	1.26888e-64	2.48088e-63	136.059
ID4	-2.92741	4.06908	-18.0295	1.40607e-64	2.74287e-63	135.957
PCNA	1.28616	8.04597	18.0105	1.84421e-64	3.59348e-63	135.686
NME1	1.48889	4.33508	18.0072	1.9305e-64	3.75737e-63	135.641
UQCC2	1.07126	4.64476	18.006	1.96588e-64	3.8219e-63	135.623
MSRB3	-1.94224	4.18067	-17.9984	2.18998e-64	4.25276e-63	135.515
PLEKHH2	-1.66181	1.92341	-17.9957	2.27727e-64	4.41728e-63	135.476
KCTD12	-1.70293	5.75548	-17.9904	2.45347e-64	4.75369e-63	135.402
SNRPB	1.18092	8.09858	17.9793	2.87342e-64	5.5611e-63	135.244
CCBE1	-1.17192	0.840498	-17.9715	3.21401e-64	6.19932e-63	135.133
CXCL12	-2.11493	5.96921	-17.9684	3.35579e-64	6.46553e-63	135.09
CLSPN	1.55929	2.05028	17.9629	3.63145e-64	6.98881e-63	135.011
NR2F6	1.16864	6.10011	17.9626	3.64798e-64	7.01277e-63	135.007
TRAF2	1.13197	4.79838	17.9464	4.59243e-64	8.81849e-63	134.777
RCBTB2	-1.18474	3.83754	-17.936	5.32219e-64	1.02084e-62	134.63
OGN	-3.24498	3.56357	-17.9305	5.7567e-64	1.10295e-62	134.552
SAA4	-1.10204	0.501076	-17.9279	5.97833e-64	1.14414e-62	134.514
ARL4A	-1.60372	4.17633	-17.9214	6.55538e-64	1.25318e-62	134.423
KIF14	1.91047	2.31882	17.9206	6.63002e-64	1.26604e-62	134.411
ZFP36	-2.19585	7.76992	-17.9105	7.65185e-64	1.45954e-62	134.269
TONSL	1.57715	3.33943	17.9097	7.73444e-64	1.47366e-62	134.258
ATP1B2	-1.33468	1.71626	-17.9	8.88139e-64	1.69032e-62	134.12
DEPDC1	1.90558	2.5068	17.8972	9.24452e-64	1.75748e-62	134.08
MTFR2	1.61687	2.35444	17.8888	1.04123e-63	1.9773e-62	133.962
PACRG	-1.04	0.847753	-17.8863	1.07955e-63	2.04781e-62	133.926
CLIP4	-1.87169	2.91592	-17.8821	1.14567e-63	2.17084e-62	133.866
TEK	-1.71315	3.30466	-17.8568	1.64119e-63	3.10634e-62	133.508
TTK	1.97032	3.20165	17.8445	1.95417e-63	3.69464e-62	133.334
TPRN	1.71503	4.45687	17.8437	1.97604e-63	3.73189e-62	133.323
MAD2L1	1.68088	3.69911	17.8415	2.03725e-63	3.83905e-62	133.293
ALG3	1.0045	5.63937	17.8231	2.64567e-63	4.96923e-62	133.032
KLHL30	-1.11165	0.633636	-17.8204	2.74909e-63	5.15784e-62	132.994
INKA2	-1.23169	2.27505	-17.8193	2.79043e-63	5.2297e-62	132.979
PLA2R1	-1.41794	2.6418	-17.8153	2.95634e-63	5.5346e-62	132.922
SYNPO	-1.53287	4.80961	-17.7871	4.40244e-63	8.2329e-62	132.525
DPYSL2	-1.48397	5.40137	-17.7857	4.49126e-63	8.38986e-62	132.505
PSRC1	1.47917	3.60976	17.7731	5.36658e-63	1.00141e-61	132.328
ADAMTS14	1.67853	2.04076	17.7705	5.57243e-63	1.0387e-61	132.29
ATP6AP1	1.14487	7.392	17.764	6.10466e-63	1.13667e-61	132.199
TESC	-1.84626	2.1256	-17.7566	6.77793e-63	1.26067e-61	132.095
KIF15	1.7229	2.81509	17.749	7.55387e-63	1.40347e-61	131.987
GLDN	-1.54921	1.25674	-17.7441	8.09572e-63	1.50252e-61	131.918
GFRA2	-1.14041	0.723868	-17.7402	8.54808e-63	1.58476e-61	131.864
CDH5	-1.54311	4.72024	-17.7373	8.90987e-63	1.65005e-61	131.823
ADGRL4	-1.55739	4.18845	-17.719	1.15355e-62	2.13401e-61	131.565
GTF2IRD1	1.02923	4.36458	17.7134	1.24795e-62	2.30615e-61	131.487
AMPD1	-1.14998	0.643449	-17.7097	1.31558e-62	2.42853e-61	131.434
TMEM132A	2.02049	5.07948	17.7064	1.37919e-62	2.54322e-61	131.387
WIF1	-3.20339	1.43009	-17.7052	1.40163e-62	2.58182e-61	131.371
CDH13	-1.33292	1.90698	-17.6936	1.65069e-62	3.03734e-61	131.208
CDC6	2.10428	3.63687	17.681	1.97424e-62	3.6288e-61	131.03
PNPLA2	-1.47236	6.28266	-17.6787	2.0374e-62	3.74089e-61	130.999
ARHGAP10	-1.23275	2.45209	-17.6662	2.43018e-62	4.45732e-61	130.823
OSR1	-2.46847	1.98837	-17.6653	2.46348e-62	4.51357e-61	130.809
CCDC85A	-1.00703	0.668495	-17.6489	3.10257e-62	5.67241e-61	130.58
TIMM17B	1.08211	5.46767	17.643	3.36926e-62	6.14693e-61	130.498
SYNE1	-1.27381	2.2574	-17.6426	3.38831e-62	6.17513e-61	130.492
KCNH8	-1.05594	0.529106	-17.6217	4.54785e-62	8.27958e-61	130.199
VAMP8	1.11714	8.84918	17.6208	4.60897e-62	8.38199e-61	130.185
AIFM2	-1.32019	3.92695	-17.6048	5.76935e-62	1.04481e-60	129.962
YDJC	1.32273	5.01298	17.6037	5.8591e-62	1.05994e-60	129.946
MT1X	-2.10191	3.69314	-17.6016	6.04102e-62	1.0917e-60	129.916
CD302	-1.49422	2.1381	-17.5902	7.08588e-62	1.27918e-60	129.757
JPT2	1.24865	7.28175	17.5855	7.57715e-62	1.36643e-60	129.69
P3H4	1.44439	5.1217	17.5844	7.69122e-62	1.38555e-60	129.675
SLC25A39	1.07954	7.0985	17.5793	8.25804e-62	1.48455e-60	129.604
C1QTNF7	-1.62928	1.2455	-17.5756	8.70917e-62	1.56401e-60	129.551
NMRAL1	1.11457	5.70745	17.5612	1.0662e-61	1.9127e-60	129.35
EZR	1.34226	8.55306	17.5597	1.08786e-61	1.94953e-60	129.33
PFDN6	1.04278	5.2774	17.5362	1.51443e-61	2.71115e-60	129
PAK4	1.253	5.47974	17.5311	1.62706e-61	2.90671e-60	128.929
BAX	1.08406	5.69766	17.5259	1.74939e-61	3.12202e-60	128.857
MAP2K6	-1.37668	2.08401	-17.5154	2.02567e-61	3.60385e-60	128.71
TPD52	1.83096	6.2791	17.5133	2.08716e-61	3.70557e-60	128.681
ARID5B	-1.59127	4.92967	-17.5128	2.10135e-61	3.72692e-60	128.674
TP63	-2.72715	2.45887	-17.5054	2.33073e-61	4.12947e-60	128.571
ARHGAP11A	1.59459	2.9315	17.4863	3.04679e-61	5.39261e-60	128.304
SMAD9	-1.24566	1.92085	-17.4834	3.17653e-61	5.61644e-60	128.262
FAM110A	1.42204	5.26068	17.4819	3.24225e-61	5.72674e-60	128.242
SLC12A8	1.34214	3.75423	17.4762	3.513e-61	6.1986e-60	128.162
EPB41L2	-1.63824	4.47763	-17.4692	3.87462e-61	6.82967e-60	128.064
B4GALT3	1.11754	5.9647	17.466	4.04957e-61	7.13074e-60	128.02
PTCHD1	-1.65424	0.772078	-17.4596	4.43261e-61	7.79721e-60	127.93
CBX4	1.5243	5.82019	17.4468	5.30062e-61	9.30504e-60	127.752
CILP2	2.20808	3.15863	17.4399	5.83805e-61	1.02276e-59	127.656
PRIMA1	-1.81355	1.95946	-17.4267	7.02322e-61	1.22914e-59	127.472
SPARCL1	-2.01479	7.90757	-17.421	7.60833e-61	1.32883e-59	127.392
LMO2	-1.19937	4.09733	-17.4068	9.27846e-61	1.61888e-59	127.194
CRYBG3	-1.78247	2.33373	-17.385	1.2586e-60	2.19375e-59	126.891
CENPE	1.68218	2.6531	17.3756	1.43477e-60	2.49574e-59	126.76
AMOTL2	-1.50223	5.03397	-17.3693	1.56508e-60	2.71967e-59	126.674
ADAMTSL4	-1.572	2.3103	-17.358	1.83393e-60	3.18363e-59	126.516
P4HA3	1.78643	2.84185	17.3538	1.94365e-60	3.36729e-59	126.458
TIMELESS	1.33578	4.80399	17.353	1.96722e-60	3.40469e-59	126.446
N4BP2L1	-1.31427	3.10322	-17.3403	2.3463e-60	4.05669e-59	126.27
C19orf12	-1.01225	4.16961	-17.333	2.59822e-60	4.48324e-59	126.169
PGAP6	1.19542	5.56296	17.3305	2.69185e-60	4.64013e-59	126.133
FEZ1	-1.05814	1.56349	-17.3214	3.05301e-60	5.25742e-59	126.008
DLC1	-1.64107	3.62933	-17.3185	3.18098e-60	5.47231e-59	125.967
PARP1	1.11394	5.70014	17.308	3.68308e-60	6.32974e-59	125.821
SLC9A9	-1.33537	2.69592	-17.3037	3.91082e-60	6.71442e-59	125.761
MMP13	3.4931	3.57736	17.3023	3.98319e-60	6.83185e-59	125.743
GALE	1.41555	4.86249	17.2874	4.90323e-60	8.40149e-59	125.536
GINS2	1.76896	4.13943	17.2873	4.91223e-60	8.40852e-59	125.534
BOC	-1.92764	2.91009	-17.2816	5.31694e-60	9.09224e-59	125.455
POU6F1	-1.05519	2.63437	-17.2804	5.40911e-60	9.24065e-59	125.438
GREM2	-1.52822	1.1702	-17.2667	6.54616e-60	1.1161e-58	125.248
ABLIM1	-1.54148	5.38432	-17.2466	8.64988e-60	1.47185e-58	124.97
CRIM1	-1.86295	5.74049	-17.2423	9.18586e-60	1.56151e-58	124.911
PPP1R14B	1.37078	6.93219	17.2404	9.43437e-60	1.60216e-58	124.884
TACC1	-1.86438	4.53011	-17.2264	1.14615e-59	1.94449e-58	124.69
SMIM10L2B	-1.22848	1.37387	-17.2256	1.15868e-59	1.96381e-58	124.679
STXBP6	-1.05874	0.67263	-17.2176	1.29532e-59	2.19325e-58	124.568
NAT14	1.55755	4.90041	17.2126	1.38727e-59	2.34662e-58	124.5
PKD2	-1.48227	4.19201	-17.2092	1.45405e-59	2.45715e-58	124.453
PARVA	-1.11932	5.2611	-17.2054	1.53371e-59	2.58923e-58	124.4
DLK2	-1.29682	1.86684	-17.2004	1.64307e-59	2.77112e-58	124.331
C20orf194	-1.13439	3.42678	-17.1942	1.79242e-59	3.02005e-58	124.245
EGR2	-2.22413	4.0901	-17.1886	1.93489e-59	3.25691e-58	124.168
STXBP2	1.40798	4.32167	17.1775	2.25763e-59	3.79273e-58	124.015
PRKD1	-1.37588	2.34455	-17.1639	2.7273e-59	4.57728e-58	123.827
REEP4	1.22185	5.28103	17.1629	2.76562e-59	4.63708e-58	123.813
SEMA3A	-1.0872	1.12646	-17.1328	4.19411e-59	7.01167e-58	123.398
MTHFD2	1.25468	4.42925	17.1286	4.44597e-59	7.42551e-58	123.34
SAPCD2	1.71389	3.28946	17.1177	5.17282e-59	8.61434e-58	123.189
COA6	1.03006	4.71335	17.1078	5.92757e-59	9.85214e-58	123.053
IGSF9	1.83936	4.50907	17.1044	6.21494e-59	1.03198e-57	123.006
GRAMD1A	1.00779	5.73429	17.0972	6.86244e-59	1.1373e-57	122.907
TINAGL1	-2.02336	4.25227	-17.0919	7.38814e-59	1.22324e-57	122.834
SEMA6D	-1.85358	1.99627	-17.0906	7.51853e-59	1.24363e-57	122.816
CCL24	-1.27352	0.600974	-17.0841	8.22548e-59	1.35926e-57	122.727
RCAN1	-1.99502	4.73341	-17.0817	8.50471e-59	1.40405e-57	122.694
PPP1CA	1.03465	6.88994	17.0793	8.7887e-59	1.44954e-57	122.661
GIMAP1	-1.3149	2.32096	-17.0783	8.91931e-59	1.46968e-57	122.646
JADE1	-1.03919	3.69472	-17.0737	9.49773e-59	1.56349e-57	122.584
RAD51AP1	1.72652	3.73919	17.0705	9.92339e-59	1.63043e-57	122.54
PCDH18	-1.80636	3.57891	-17.0695	1.00648e-58	1.65209e-57	122.526
DBNDD1	1.69483	4.74196	17.0654	1.06539e-58	1.74712e-57	122.469
CCDC82	-1.11044	1.82105	-17.065	1.07154e-58	1.75553e-57	122.464
COL17A1	-3.49106	3.29439	-17.0585	1.17232e-58	1.9188e-57	122.374
STAT5B	-1.21984	5.4552	-17.0485	1.34634e-58	2.20154e-57	122.236
ARAP3	-1.17842	3.23295	-17.0429	1.45424e-58	2.37572e-57	122.159
ESCO2	1.40162	1.87448	17.0423	1.46531e-58	2.39154e-57	122.152
ZC3H12C	-1.26343	1.80019	-17.0389	1.53657e-58	2.50546e-57	122.104
FOS	-2.9063	7.38604	-17.022	1.93826e-58	3.15445e-57	121.873
OIP5	1.1615	1.79315	17.0097	2.29925e-58	3.73841e-57	121.703
SLC20A1	1.08331	5.60626	17.0068	2.39092e-58	3.88377e-57	121.664
GIMAP6	-1.57125	4.22643	-17.0036	2.4991e-58	4.05566e-57	121.62
ECT2	1.61333	4.94011	16.9891	3.05281e-58	4.94958e-57	121.421
TRIB3	1.56471	5.48812	16.9588	4.63479e-58	7.50033e-57	121.005
RASIP1	-1.47524	3.4151	-16.9572	4.73418e-58	7.65396e-57	120.984
NMNAT2	-1.72763	1.25158	-16.9569	4.75304e-58	7.67723e-57	120.98
THRSP	-3.58866	3.97533	-16.9467	5.47129e-58	8.82907e-57	120.84
TSEN54	1.1625	5.20495	16.9445	5.63923e-58	9.09153e-57	120.809
DCTPP1	1.16837	6.42688	16.9407	5.94356e-58	9.56423e-57	120.757
ABI3BP	-2.15758	2.86199	-16.9371	6.23982e-58	1.00316e-56	120.709
KRT8	2.13343	8.83843	16.9363	6.31455e-58	1.01422e-56	120.697
C4BPA	-1.83669	0.851736	-16.9283	7.04782e-58	1.13094e-56	120.587
MMP28	-1.62419	2.51643	-16.9121	8.80689e-58	1.4119e-56	120.365
AK5	-2.60751	2.4141	-16.9062	9.54612e-58	1.52898e-56	120.285
C2CD2	-1.35027	4.00348	-16.9021	1.00928e-57	1.61504e-56	120.23
FLVCR1	1.23383	3.8243	16.8884	1.2189e-57	1.94705e-56	120.042
ALDH2	-1.84631	4.72951	-16.8884	1.21903e-57	1.94705e-56	120.042
GPRASP2	-1.32166	3.35409	-16.8863	1.254e-57	2.00104e-56	120.013
CCL11	1.76966	1.94965	16.8792	1.38361e-57	2.20173e-56	119.915
SLC27A6	-2.22628	1.64946	-16.8773	1.41859e-57	2.25531e-56	119.891
KCNJ2	-1.33907	2.17459	-16.8724	1.51692e-57	2.4094e-56	119.824
PTPN21	-1.4366	3.13878	-16.8702	1.56404e-57	2.48196e-56	119.793
EHBP1	-1.11407	3.87745	-16.8638	1.70682e-57	2.70604e-56	119.706
WSCD2	-1.12742	0.612242	-16.8471	2.14795e-57	3.39602e-56	119.477
ADAM8	1.79505	3.7257	16.8298	2.72087e-57	4.29787e-56	119.242
HES6	1.99899	3.46456	16.829	2.75286e-57	4.34441e-56	119.23
CNIH2	1.83596	2.5185	16.8253	2.89335e-57	4.56193e-56	119.181
POLE2	1.14523	2.94966	16.8198	3.12023e-57	4.90616e-56	119.105
MRGPRX3	-1.35744	0.660782	-16.814	3.37713e-57	5.30525e-56	119.027
ACTG2	-3.37816	4.19283	-16.812	3.47473e-57	5.45358e-56	118.998
SLC16A3	1.7122	3.38161	16.8113	3.50399e-57	5.49449e-56	118.99
PDIA4	1.10708	7.95272	16.7817	5.25571e-57	8.23378e-56	118.586
ALKAL2	-1.77461	0.815061	-16.7509	8.00707e-57	1.24759e-55	118.167
AFAP1L1	-1.17828	2.96387	-16.7468	8.46336e-57	1.31749e-55	118.112
YIF1B	1.01371	4.70371	16.7459	8.57598e-57	1.33382e-55	118.099
NCALD	-1.95431	3.35475	-16.742	9.04548e-57	1.4043e-55	118.045
TEF	-1.32699	4.43131	-16.7379	9.56006e-57	1.48284e-55	117.99
STAT5A	-1.42405	4.85184	-16.7343	1.00428e-56	1.55631e-55	117.941
SLC29A4	-1.73172	2.27043	-16.7265	1.11675e-56	1.72749e-55	117.836
FGF7	-1.75948	2.44239	-16.7197	1.22545e-56	1.89224e-55	117.743
PCSK5	-1.26592	1.85727	-16.7163	1.28351e-56	1.9801e-55	117.697
NFIB	-2.15738	4.64168	-16.7138	1.32836e-56	2.04563e-55	117.663
INPP1	-1.15381	3.50683	-16.7116	1.36918e-56	2.1066e-55	117.633
ALDOC	-2.15949	3.63433	-16.709	1.41724e-56	2.1786e-55	117.598
GRK5	-1.10165	2.99489	-16.7039	1.52077e-56	2.33565e-55	117.528
EVPL	1.62263	4.43779	16.6906	1.82232e-56	2.79629e-55	117.348
ZDHHC12	1.08417	5.4058	16.678	2.16248e-56	3.31528e-55	117.177
OLR1	1.97835	4.12949	16.6741	2.28127e-56	3.49429e-55	117.124
ANO6	-1.30682	5.52438	-16.6731	2.31315e-56	3.53996e-55	117.11
KCNC4	-1.09062	1.49445	-16.6554	2.9421e-56	4.49448e-55	116.871
TRPC6	-1.14889	1.77944	-16.6448	3.39911e-56	5.18342e-55	116.727
MFAP4	-2.84941	5.9034	-16.6413	3.56594e-56	5.433e-55	116.679
TUBA1C	1.23736	5.50991	16.6277	4.28848e-56	6.51076e-55	116.495
DUSP1	-2.24607	7.73296	-16.6273	4.316e-56	6.54676e-55	116.489
RGS2	-2.27494	5.31818	-16.6269	4.33499e-56	6.56927e-55	116.485
E2F8	1.75049	2.20872	16.6269	4.33848e-56	6.56927e-55	116.484
LMNB2	1.26791	5.43175	16.6255	4.42024e-56	6.68717e-55	116.465
PPP1R16B	-1.78041	2.65663	-16.6225	4.60356e-56	6.95839e-55	116.425
KAT2B	-1.30645	3.61832	-16.6072	5.66847e-56	8.54547e-55	116.218
SPINT2	1.66307	6.13729	16.6005	6.20873e-56	9.34354e-55	116.127
ETS2	-1.31944	5.17873	-16.595	6.69189e-56	1.00618e-54	116.052
NUDT16L1	1.22072	5.85058	16.5895	7.20622e-56	1.08162e-54	115.979
LRIG3	-1.67059	3.53321	-16.5702	9.36447e-56	1.40312e-54	115.718
ARHGAP24	-1.12347	2.0577	-16.5535	1.17511e-55	1.75765e-54	115.492
P3H2	-1.6386	2.48377	-16.5443	1.33116e-55	1.9876e-54	115.367
ANGPTL2	-1.8347	5.96893	-16.539	1.42958e-55	2.13086e-54	115.296
CHPF	1.32986	6.94569	16.5361	1.48613e-55	2.21322e-54	115.258
F12	1.73537	2.59113	16.5286	1.64632e-55	2.44755e-54	115.156
COPE	1.00666	6.38018	16.5266	1.69212e-55	2.51347e-54	115.128
CACNA2D1	-1.57037	2.44525	-16.5197	1.85605e-55	2.75221e-54	115.036
FANCI	1.43154	3.38981	16.5137	2.01288e-55	2.97962e-54	114.956
DIXDC1	-1.46546	3.86846	-16.5134	2.02206e-55	2.99063e-54	114.951
MCM10	1.89991	2.72428	16.5126	2.04404e-55	3.02053e-54	114.94
SNRPE	1.03516	6.8122	16.5044	2.28374e-55	3.36896e-54	114.83
CCL28	-2.90164	3.71427	-16.5035	2.3117e-55	3.40727e-54	114.818
OPRPN	-3.17673	1.44195	-16.4974	2.51163e-55	3.69879e-54	114.735
RNF180	-1.33965	2.15013	-16.4962	2.5504e-55	3.75267e-54	114.72
KIF18A	1.54702	2.61147	16.493	2.66482e-55	3.91768e-54	114.676
PTCH1	-1.14844	1.41923	-16.4917	2.71116e-55	3.9824e-54	114.659
EFEMP1	-2.39616	6.08027	-16.4729	3.49515e-55	5.11649e-54	114.406
DES	-2.42921	1.55153	-16.4616	4.0726e-55	5.95673e-54	114.254
KIF26B	1.82282	2.8073	16.4579	4.27988e-55	6.25459e-54	114.204
MCM4	1.55537	5.8566	16.4564	4.36701e-55	6.37651e-54	114.184
IL6	-2.14794	1.69385	-16.4461	5.01969e-55	7.30468e-54	114.046
MOB3B	-1.61111	2.646	-16.4443	5.14686e-55	7.48341e-54	114.021
DUSP6	-1.69465	5.52249	-16.4439	5.1747e-55	7.51753e-54	114.015
MRPS12	1.10702	5.76635	16.443	5.23832e-55	7.60352e-54	114.003
CBX8	1.18931	3.3123	16.4428	5.2473e-55	7.61014e-54	114.001
CDCA2	1.81679	2.76869	16.4406	5.41207e-55	7.84249e-54	113.971
ACKR1	-3.31538	4.33824	-16.4312	6.14006e-55	8.8899e-54	113.845
P2RY14	-1.16696	1.70246	-16.4243	6.7382e-55	9.74771e-54	113.752
TRABD2B	-1.59086	1.58187	-16.4181	7.33056e-55	1.05957e-53	113.668
UNC5B	1.66315	5.02351	16.3987	9.5177e-55	1.37339e-53	113.408
FAM3D	-2.02585	1.08617	-16.3884	1.09368e-54	1.57684e-53	113.27
GGCT	1.25529	6.30663	16.3745	1.31793e-54	1.89857e-53	113.084
EPCAM	1.82451	8.10582	16.3705	1.39076e-54	2.00181e-53	113.031
JTB	1.02577	4.86642	16.3622	1.55569e-54	2.23733e-53	112.919
NEXN	-1.49194	3.262	-16.3418	2.04622e-54	2.93787e-53	112.646
MFAP2	1.94013	4.70777	16.3173	2.84412e-54	4.07325e-53	112.318
VLDLR	-1.53641	2.51583	-16.3084	3.20503e-54	4.58249e-53	112.199
KLHL21	-1.20546	4.75687	-16.3077	3.23505e-54	4.62158e-53	112.19
TLR4	-1.2916	2.68952	-16.2994	3.61917e-54	5.16604e-53	112.078
STOX2	-1.21185	1.25518	-16.2891	4.15586e-54	5.92719e-53	111.941
PPARA	-1.26668	2.38402	-16.2883	4.19801e-54	5.97738e-53	111.931
SHISA3	-1.02945	0.506149	-16.2758	4.96647e-54	7.06571e-53	111.763
SLC37A1	1.10122	4.19632	16.2653	5.71705e-54	8.12682e-53	111.623
ADM2	1.64253	3.34112	16.2603	6.11347e-54	8.68315e-53	111.556
MET	-2.12988	3.43072	-16.2578	6.3223e-54	8.97234e-53	111.523
PTN	-2.98249	4.86094	-16.2539	6.66233e-54	9.44709e-53	111.471
ATF3	-2.25948	4.77087	-16.2533	6.71584e-54	9.51513e-53	111.463
HSD11B1	-1.98836	2.56265	-16.2485	7.15851e-54	1.0134e-52	111.399
HOXA9	-1.7217	1.51615	-16.2338	8.72261e-54	1.2338e-52	111.202
CIT	1.06251	1.76725	16.2297	9.21018e-54	1.3017e-52	111.148
FBXL19	1.13818	4.25016	16.2286	9.35306e-54	1.3208e-52	111.133
RAD54L	1.4551	2.11987	16.2229	1.00871e-53	1.42329e-52	111.058
NR5A2	-1.10405	1.51419	-16.2223	1.01774e-53	1.43485e-52	111.049
CACFD1	1.38974	5.45913	16.2215	1.02795e-53	1.44806e-52	111.039
LPAR2	1.14397	4.5782	16.2181	1.07653e-53	1.51526e-52	110.993
PSMG3	1.02756	5.63406	16.2043	1.29465e-53	1.81928e-52	110.809
SAC3D1	1.2463	4.51835	16.1885	1.59924e-53	2.2418e-52	110.599
ROGDI	1.36771	3.77466	16.1674	2.12022e-53	2.96485e-52	110.318
TMEM9	1.06325	6.92156	16.1617	2.28775e-53	3.19652e-52	110.242
GPM6B	-1.84293	3.13632	-16.1493	2.69869e-53	3.76458e-52	110.078
MCRIP2	1.32533	4.11074	16.1464	2.80555e-53	3.91048e-52	110.039
RBBP8NL	1.40962	3.31252	16.1425	2.95568e-53	4.1164e-52	109.987
CENPX	1.31358	6.32331	16.1298	3.49857e-53	4.8646e-52	109.819
BBOX1	-2.74846	2.31718	-16.1279	3.59218e-53	4.99072e-52	109.793
APOLD1	-1.67432	3.97248	-16.125	3.73315e-53	5.18238e-52	109.755
PPP2R1B	-1.09522	4.30522	-16.1225	3.85555e-53	5.34797e-52	109.723
ARHGEF40	-1.21298	4.35631	-16.1163	4.18803e-53	5.80447e-52	109.64
F3	-2.16432	4.55162	-16.0685	7.91748e-53	1.09205e-51	109.006
PLAUR	1.51956	4.59953	16.0642	8.3817e-53	1.15423e-51	108.949
CD200	-1.34257	3.95155	-16.0631	8.50325e-53	1.17003e-51	108.935
SHANK3	-1.21305	3.45056	-16.0621	8.62619e-53	1.186e-51	108.921
IRF7	1.64878	5.47164	16.0603	8.82637e-53	1.21255e-51	108.898
ZNF677	-1.27828	1.69531	-16.0595	8.9289e-53	1.22566e-51	108.886
UTRN	-1.5327	4.7515	-16.0485	1.03244e-52	1.41495e-51	108.742
CCL23	-1.12509	0.947809	-16.0477	1.04483e-52	1.4308e-51	108.73
PRNP	-1.59045	6.70758	-16.0369	1.20452e-52	1.64816e-51	108.588
POLQ	1.28766	1.79243	16.0128	1.66012e-52	2.26796e-51	108.269
E2F2	1.57375	2.51025	16.0087	1.7529e-52	2.3928e-51	108.215
PTGER4	-1.49535	3.30306	-16.008	1.77013e-52	2.41441e-51	108.205
PRELP	-2.3226	4.6799	-16.0002	1.96082e-52	2.67026e-51	108.103
CRY2	-1.14579	4.87928	-15.9937	2.13939e-52	2.91113e-51	108.016
FGFBP1	-2.39031	1.15413	-15.9916	2.19948e-52	2.98816e-51	107.989
SDF2L1	1.37869	5.73748	15.9908	2.22222e-52	3.01667e-51	107.979
INTS7	1.08243	4.91835	15.9894	2.26373e-52	3.0706e-51	107.96
RASSF7	1.61572	5.09444	15.9857	2.37875e-52	3.22407e-51	107.911
THRB	-1.56444	3.17335	-15.9834	2.45246e-52	3.32136e-51	107.88
VGLL3	-1.54321	2.2733	-15.9713	2.87988e-52	3.891e-51	107.72
APBA1	-1.17325	1.49581	-15.9697	2.94142e-52	3.97104e-51	107.699
AVPR1A	-1.30609	2.14573	-15.9592	3.37744e-52	4.5561e-51	107.562
EPDR1	-1.67981	3.78395	-15.9578	3.44367e-52	4.6418e-51	107.542
RAB26	2.07421	3.27024	15.9577	3.44834e-52	4.64445e-51	107.541
CYP26B1	-1.64286	2.11055	-15.9546	3.59114e-52	4.82544e-51	107.501
COL1A1	2.43101	10.6081	15.9512	3.7553e-52	5.04208e-51	107.456
LAMP5	2.32649	3.90011	15.9313	4.88824e-52	6.5581e-51	107.194
MAFF	-1.38016	3.56424	-15.9299	4.97711e-52	6.67213e-51	107.176
KCTD14	-1.58807	1.29587	-15.9285	5.07362e-52	6.79619e-51	107.157
DONSON	1.10439	3.80077	15.9274	5.14833e-52	6.8877e-51	107.142
SYNGR2	1.09364	7.72694	15.9272	5.16253e-52	6.89917e-51	107.139
CENPK	1.22069	2.26828	15.9239	5.38768e-52	7.18887e-51	107.097
OCIAD2	1.03948	5.80195	15.9125	6.26889e-52	8.35171e-51	106.946
EPN3	1.87755	4.48451	15.9078	6.67114e-52	8.88072e-51	106.884
STIL	1.45272	2.94119	15.8962	7.77399e-52	1.03329e-50	106.732
TMEM47	-1.87625	4.42625	-15.8916	8.2644e-52	1.09762e-50	106.671
RTKN	1.03685	5.03951	15.8894	8.50188e-52	1.12829e-50	106.643
HABP4	-1.00403	3.02646	-15.868	1.1283e-51	1.49276e-50	106.361
TAMALIN	-1.36109	3.07199	-15.8669	1.14502e-51	1.51256e-50	106.346
ALDH1A3	-1.77105	2.65034	-15.8635	1.19673e-51	1.57965e-50	106.302
PTGS2	-2.02425	1.58888	-15.8442	1.54408e-51	2.0319e-50	106.049
CARD6	-1.22205	2.98977	-15.8354	1.73335e-51	2.27921e-50	105.933
PKP3	1.47692	5.8144	15.8328	1.79507e-51	2.35856e-50	105.899
RNF125	-1.22358	2.85496	-15.8261	1.9601e-51	2.57344e-50	105.811
FGD4	-1.13589	2.67334	-15.8102	2.41575e-51	3.16682e-50	105.603
S100P	4.15187	6.37568	15.7996	2.77646e-51	3.63691e-50	105.464
AMOTL1	-1.63328	3.8905	-15.7965	2.89555e-51	3.79002e-50	105.423
C3orf80	1.27836	2.24806	15.7937	3.00277e-51	3.92439e-50	105.386
STRBP	1.05123	4.80123	15.7886	3.21063e-51	4.19284e-50	105.32
H3C10	2.74353	3.73829	15.7817	3.51365e-51	4.58161e-50	105.23
CACNB3	1.23661	4.31034	15.7761	3.78199e-51	4.92776e-50	105.157
NMB	-1.65853	3.9949	-15.7686	4.17861e-51	5.44042e-50	105.057
RIMS3	-1.38787	1.9848	-15.7673	4.24575e-51	5.52365e-50	105.042
CSRP1	-1.24788	6.69307	-15.7621	4.55065e-51	5.90691e-50	104.973
RHOU	-1.78122	4.31759	-15.7542	5.04714e-51	6.54149e-50	104.869
ABCG2	-1.29701	1.79406	-15.7522	5.18142e-51	6.71047e-50	104.843
SMS	1.01042	7.55392	15.7501	5.32186e-51	6.88716e-50	104.817
PTPRM	-1.41923	4.00309	-15.7452	5.67564e-51	7.33395e-50	104.753
MAP3K20	-1.32691	4.20485	-15.7434	5.8118e-51	7.50426e-50	104.729
CEBPA	-1.4872	3.44457	-15.7402	6.06706e-51	7.82797e-50	104.686
RETSAT	-1.20853	6.49489	-15.7337	6.60822e-51	8.51979e-50	104.601
PNMA8B	-1.02903	1.30113	-15.7298	6.9477e-51	8.94406e-50	104.551
EME1	1.30608	1.93974	15.7287	7.05021e-51	9.06924e-50	104.537
MGAM2	-1.62795	0.731049	-15.7194	7.96585e-51	1.02394e-49	104.415
AUNIP	1.36947	2.5067	15.7116	8.82924e-51	1.13408e-49	104.313
CALCOCO1	-1.07794	4.96236	-15.7113	8.85985e-51	1.13631e-49	104.309
CCDC158	-1.13632	1.05913	-15.7048	9.64948e-51	1.23482e-49	104.224
LONRF3	-1.07942	1.13148	-15.698	1.05462e-50	1.34756e-49	104.136
PDE1B	-1.07402	1.80917	-15.6865	1.22566e-50	1.56263e-49	103.986
GULP1	-1.27082	1.76587	-15.6736	1.45165e-50	1.84664e-49	103.818
PHKG1	-1.14327	1.42969	-15.6663	1.59798e-50	2.03128e-49	103.722
CENPL	1.02642	3.04198	15.6636	1.65581e-50	2.10324e-49	103.687
KLF6	-1.31472	6.73192	-15.6484	2.01797e-50	2.55667e-49	103.49
ARRDC3	-1.40896	5.94608	-15.6484	2.01874e-50	2.55667e-49	103.489
ANKRD35	-1.55459	1.96633	-15.6427	2.17645e-50	2.75438e-49	103.415
C21orf58	1.17281	2.66398	15.636	2.37469e-50	3.00305e-49	103.328
CDCA4	1.07077	4.37511	15.6266	2.6846e-50	3.39246e-49	103.206
RDM1	1.07303	1.27294	15.6151	3.11779e-50	3.93409e-49	103.057
CENPI	1.3464	2.31429	15.5942	4.09848e-50	5.1564e-49	102.784
FAM124A	-1.03536	1.42089	-15.5893	4.36637e-50	5.48942e-49	102.721
NECTIN2	1.26452	7.48157	15.5829	4.74654e-50	5.95865e-49	102.638
KLF11	-1.24842	4.18591	-15.5712	5.53194e-50	6.93955e-49	102.486
VIM	-1.35731	8.34318	-15.5699	5.62301e-50	7.04865e-49	102.47
ISG15	2.6522	7.57301	15.5564	6.70814e-50	8.39665e-49	102.294
TUBG1	1.03378	5.76748	15.5535	6.96085e-50	8.70663e-49	102.257
CHTF18	1.39832	3.44429	15.5506	7.23589e-50	9.04407e-49	102.219
RNFT2	1.10853	1.84365	15.5399	8.31493e-50	1.03852e-48	102.08
CYP11A1	-1.02552	0.94119	-15.5387	8.44926e-50	1.05453e-48	102.064
TUFT1	1.34513	5.62349	15.5313	9.29949e-50	1.1598e-48	101.969
METTL26	1.07326	6.26632	15.5287	9.62396e-50	1.1994e-48	101.935
STMN1	1.47015	6.41181	15.5214	1.05778e-49	1.31636e-48	101.841
TLE4	-1.29996	2.71546	-15.5142	1.16181e-49	1.44374e-48	101.747
NGFR	-2.3834	3.14734	-15.5111	1.2088e-49	1.49996e-48	101.708
PIGR	-3.74365	3.35777	-15.5039	1.32735e-49	1.6435e-48	101.615
CDNF	-1.05556	2.2333	-15.5032	1.34059e-49	1.6587e-48	101.605
PSME2	1.08941	6.75498	15.5002	1.3934e-49	1.72157e-48	101.566
ORC6	1.5183	2.45639	15.4942	1.50576e-49	1.85771e-48	101.489
PTPRZ1	-1.73239	0.926221	-15.4941	1.50877e-49	1.86009e-48	101.487
TRPC1	-1.11427	2.13148	-15.475	1.93389e-49	2.38079e-48	101.24
RASL10A	-1.12872	1.31051	-15.4568	2.44874e-49	3.01246e-48	101.005
HSD17B11	-1.35352	4.60979	-15.449	2.70767e-49	3.32624e-48	100.905
IQCN	-1.3339	1.65546	-15.4483	2.73233e-49	3.35413e-48	100.896
FKBP4	1.37866	7.42547	15.4461	2.81361e-49	3.44898e-48	100.867
KRT18	1.98552	9.03107	15.4449	2.85441e-49	3.4965e-48	100.853
MYEOV	-2.25997	1.71224	-15.441	3.00329e-49	3.67625e-48	100.802
PKDCC	-1.69756	2.91987	-15.4393	3.07138e-49	3.75692e-48	100.78
ATAD2	1.6452	5.04798	15.4217	3.85911e-49	4.71042e-48	100.552
RCC1	1.10199	5.52811	15.4207	3.90952e-49	4.76789e-48	100.539
BMP5	-1.64332	0.837572	-15.413	4.31849e-49	5.2562e-48	100.44
EMC9	1.08614	4.33022	15.4114	4.4062e-49	5.35916e-48	100.42
NCAM1	-1.35212	0.974669	-15.4113	4.41571e-49	5.36692e-48	100.418
GPR34	-1.61377	3.77229	-15.4052	4.77868e-49	5.80399e-48	100.34
SCT	1.60922	1.82057	15.3905	5.78018e-49	7.00551e-48	100.15
HELLS	1.20779	2.60547	15.3884	5.93405e-49	7.18693e-48	100.124
SDC1	2.0341	8.02863	15.388	5.96668e-49	7.22136e-48	100.119
ACSM3	-1.1558	1.3131	-15.3803	6.59122e-49	7.96601e-48	100.02
EXOSC4	1.24946	5.37002	15.3785	6.7499e-49	8.15206e-48	99.9959
NAP1L2	-1.67568	1.9383	-15.3653	8.00081e-49	9.63574e-48	99.8266
C6	-1.62776	1.02885	-15.3489	9.88661e-49	1.18985e-47	99.616
IER5L	1.39443	3.67999	15.344	1.05343e-48	1.26691e-47	99.5528
PACSIN1	1.31229	1.81177	15.3431	1.06594e-48	1.28107e-47	99.5411
CPM	-1.55344	3.76091	-15.3347	1.18786e-48	1.42659e-47	99.4333
PTGIS	-1.93453	3.79534	-15.3332	1.21082e-48	1.45316e-47	99.4142
PAGR1	1.01005	3.52831	15.3305	1.25376e-48	1.50259e-47	99.3795
TJP3	1.81856	5.30361	15.3287	1.28402e-48	1.53778e-47	99.3558
MID1	-1.69529	2.31504	-15.3261	1.32787e-48	1.58919e-47	99.3224
C1orf35	1.02624	4.19633	15.3228	1.38484e-48	1.65622e-47	99.2806
PTCH2	-1.12061	1.54066	-15.3161	1.50926e-48	1.80376e-47	99.1949
FIGN	-1.27831	1.20158	-15.3118	1.59533e-48	1.90398e-47	99.1397
TYMP	1.58849	5.93964	15.3099	1.63487e-48	1.94982e-47	99.1154
ARFGAP1	1.00565	5.53086	15.3008	1.83831e-48	2.18941e-47	98.9986
ZEB2	-1.21304	2.59479	-15.3003	1.85102e-48	2.20303e-47	98.9918
SMIM29	1.03645	5.55715	15.288	2.16751e-48	2.57791e-47	98.8347
CLIC2	-1.3007	3.93182	-15.2801	2.40147e-48	2.85222e-47	98.7326
ACTA2	-1.81668	7.1019	-15.2786	2.44764e-48	2.90505e-47	98.7137
MEF2C	-1.12318	3.12345	-15.2754	2.54987e-48	3.02221e-47	98.673
BACH2	-1.13064	1.50301	-15.275	2.56285e-48	3.0355e-47	98.6679
PRR11	1.72219	3.15044	15.2743	2.58693e-48	3.06191e-47	98.6586
IL4I1	1.91751	3.37061	15.2738	2.60479e-48	3.08093e-47	98.6518
LUZP2	-1.03341	0.616056	-15.2709	2.70082e-48	3.19232e-47	98.6157
KIF24	1.11046	2.59896	15.266	2.87732e-48	3.3986e-47	98.5527
PIK3R1	-1.59582	5.45306	-15.2614	3.05352e-48	3.60177e-47	98.4936
MAZ	1.07207	4.13408	15.2496	3.55543e-48	4.19092e-47	98.3421
SOSTDC1	-2.69531	2.12117	-15.2487	3.59504e-48	4.2347e-47	98.3311
QKI	-1.16011	4.17096	-15.2481	3.62161e-48	4.26308e-47	98.3237
ELOB	1.02037	8.59666	15.244	3.81646e-48	4.48937e-47	98.2716
FADS3	-1.15067	3.46139	-15.2363	4.21523e-48	4.95506e-47	98.1727
DLG3	1.05515	5.1661	15.2354	4.26363e-48	5.00598e-47	98.1613
AHNAK	-1.58879	7.96556	-15.2312	4.50145e-48	5.27708e-47	98.1073
LIG1	1.01422	4.24511	15.2305	4.54418e-48	5.32354e-47	98.0979
PFKFB4	1.01848	2.93429	15.2245	4.90815e-48	5.73819e-47	98.0212
DAB2IP	-1.13399	4.70704	-15.2172	5.38813e-48	6.29506e-47	97.9283
APCDD1L	-1.91811	1.85617	-15.2074	6.11355e-48	7.13288e-47	97.8026
SSX2IP	1.1204	3.72248	15.2029	6.47494e-48	7.53918e-47	97.7455
PLP1	-1.55605	0.910257	-15.1982	6.87628e-48	8.00107e-47	97.6856
SPINT1	1.40091	7.55613	15.196	7.06912e-48	8.21988e-47	97.6581
ZNF106	-1.27271	4.61815	-15.1853	8.11318e-48	9.42116e-47	97.521
H4C9	1.59601	4.88427	15.1807	8.60935e-48	9.98383e-47	97.4619
GPRC5B	-1.53843	4.08331	-15.1794	8.74712e-48	1.01367e-46	97.4461
DCN	-2.22536	7.07556	-15.1788	8.81552e-48	1.02091e-46	97.4383
THOC6	1.00929	5.58235	15.1716	9.6699e-48	1.11835e-46	97.3463
MYL9	-1.55034	8.0402	-15.1706	9.79159e-48	1.13166e-46	97.3338
DRD2	-1.34369	0.762154	-15.1692	9.96468e-48	1.15089e-46	97.3164
PPP1R15A	-1.19507	5.93835	-15.1689	1.00023e-47	1.15447e-46	97.3126
SAV1	-1.04221	4.6616	-15.1641	1.06444e-47	1.22775e-46	97.2507
HMGA1	1.37965	7.34949	15.1542	1.20789e-47	1.3904e-46	97.1249
GBE1	-1.13121	4.62245	-15.1487	1.29614e-47	1.491e-46	97.0547
TMEM54	1.17777	6.2103	15.148	1.30761e-47	1.50319e-46	97.0459
NRIP2	-1.03509	2.71065	-15.1469	1.32598e-47	1.52328e-46	97.0321
SIRPA	-1.31655	5.29772	-15.1443	1.37171e-47	1.57371e-46	96.9983
CST1	3.64884	3.63687	15.1412	1.42656e-47	1.63555e-46	96.9593
B4GALNT4	1.79108	4.37437	15.14	1.44937e-47	1.66059e-46	96.9435
IFFO2	-1.48151	4.14665	-15.1395	1.45882e-47	1.6703e-46	96.937
NACAD	-1.15838	1.53751	-15.1345	1.55389e-47	1.77797e-46	96.8742
GRAMD2B	-1.28752	3.8944	-15.1287	1.67388e-47	1.91144e-46	96.8002
KRT19	2.35596	10.6316	15.1228	1.8044e-47	2.05776e-46	96.7255
RTKN2	1.12651	1.94202	15.0933	2.6306e-47	2.99202e-46	96.3503
SOX5	-1.13707	1.03049	-15.0903	2.73256e-47	3.10184e-46	96.3124
ZCCHC24	-1.56272	4.55002	-15.0864	2.87198e-47	3.25553e-46	96.2629
DNA2	1.20355	2.76882	15.0864	2.87364e-47	3.25553e-46	96.2623
FLT4	-1.06253	2.70703	-15.0698	3.55212e-47	4.01887e-46	96.0514
EBP	1.07297	4.86178	15.0695	3.56358e-47	4.02919e-46	96.0482
ABHD11	1.23098	6.08359	15.0644	3.80371e-47	4.29787e-46	95.9833
TENM2	-1.52376	1.31279	-15.0642	3.81331e-47	4.30588e-46	95.9808
ACKR4	-1.2319	1.54277	-15.0614	3.95094e-47	4.45543e-46	95.9455
CLEC14A	-1.29959	4.99433	-15.0536	4.36321e-47	4.91712e-46	95.8467
PLK4	1.28191	3.07628	15.0437	4.95403e-47	5.57929e-46	95.7203
FANCD2	1.12164	3.05229	15.0431	4.99186e-47	5.61822e-46	95.7128
LAMA3	-2.2028	3.32114	-15.0425	5.0284e-47	5.65563e-46	95.7055
MISP	2.75299	4.7099	15.0403	5.17303e-47	5.8107e-46	95.6773
RND3	-1.69394	5.30821	-15.0379	5.33092e-47	5.98414e-46	95.6474
FNDC10	1.53381	4.5608	15.0371	5.38411e-47	6.0399e-46	95.6375
CLEC5A	1.59029	2.04572	15.0341	5.59444e-47	6.26359e-46	95.5993
PRKAR2B	-1.93988	5.31004	-15.0331	5.67009e-47	6.34415e-46	95.586
H2BC12	1.76283	7.36007	15.02	6.69556e-47	7.46723e-46	95.4205
TMEM79	1.24939	4.55312	15.0091	7.6904e-47	8.57116e-46	95.2827
C1GALT1C1L	-1.13006	1.51433	-15.0013	8.49671e-47	9.45755e-46	95.1835
SGK1	-1.39303	4.28549	-15.0004	8.59483e-47	9.56056e-46	95.172
PRR36	1.87071	4.19059	14.9986	8.79381e-47	9.77558e-46	95.1493
ADD3	-1.5583	4.96855	-14.9942	9.29432e-47	1.03253e-45	95.0942
LRRC45	1.29335	4.55288	14.9921	9.54605e-47	1.05981e-45	95.0676
CXCL10	2.72094	5.89153	14.9901	9.79769e-47	1.08704e-45	95.0417
SALL4	1.15125	1.42509	14.9748	1.18893e-46	1.3174e-45	94.8491
VAV2	1.03581	5.22964	14.9711	1.24748e-46	1.38139e-45	94.8013
LIX1L	-1.08441	4.25663	-14.9584	1.46415e-46	1.62028e-45	94.6419
TTYH3	1.19951	5.76012	14.9564	1.50325e-46	1.66141e-45	94.6157
LPCAT2	-1.30466	3.47851	-14.9523	1.58323e-46	1.74643e-45	94.5641
FLNC	-1.56857	2.3815	-14.9419	1.80587e-46	1.98946e-45	94.4332
CRTAC1	-1.72781	1.39487	-14.9157	2.51601e-46	2.76826e-45	94.1032
ALPK3	-1.07918	1.97778	-14.9076	2.7888e-46	3.06251e-45	94.0007
MEST	-1.74246	4.65946	-14.8967	3.1992e-46	3.51095e-45	93.8641
HPRT1	1.01642	6.28488	14.8944	3.29715e-46	3.61613e-45	93.8341
SELP	-2.08194	2.81331	-14.8918	3.40754e-46	3.73482e-45	93.8013
BRINP1	-1.84179	1.34859	-14.8827	3.82293e-46	4.18744e-45	93.6869
PFKFB3	-1.69095	5.9897	-14.8801	3.94609e-46	4.31959e-45	93.6553
BCL6	-1.19841	5.09573	-14.874	4.26588e-46	4.66667e-45	93.5778
ANGPTL4	-2.29759	4.05259	-14.8711	4.42583e-46	4.83549e-45	93.5411
IGFBP1	-1.11843	0.382031	-14.8647	4.79914e-46	5.24003e-45	93.4606
ACOT7	1.19809	4.74509	14.861	5.0258e-46	5.48054e-45	93.4146
CFI	-1.01113	1.36102	-14.861	5.02952e-46	5.48112e-45	93.4139
ITIH2	-1.44094	0.783214	-14.8532	5.54499e-46	6.0314e-45	93.3168
RIC3	-1.54242	1.25654	-14.8515	5.66671e-46	6.1599e-45	93.2952
LCA5	-1.16439	2.51988	-14.8403	6.52793e-46	7.0916e-45	93.1544
ORC1	1.47916	2.69574	14.8398	6.57307e-46	7.13612e-45	93.1476
EVC2	-1.09105	1.8969	-14.8358	6.91122e-46	7.4985e-45	93.0977
MGAT3	-1.48724	1.91968	-14.8264	7.7756e-46	8.42569e-45	92.9804
FNDC4	-1.48127	3.51558	-14.8259	7.82401e-46	8.47281e-45	92.9742
TBC1D4	-1.27354	4.41528	-14.8234	8.07532e-46	8.73945e-45	92.9428
IDH2	1.24948	7.86421	14.8061	1.00422e-45	1.08544e-44	92.7259
FCGR1A	1.17809	2.41518	14.7972	1.12322e-45	1.21254e-44	92.6144
SEMA6A	-1.56209	2.63511	-14.787	1.27836e-45	1.37829e-44	92.4857
FHOD3	-1.39755	2.22386	-14.786	1.29356e-45	1.3938e-44	92.4739
LPAR6	-1.1117	4.62535	-14.7751	1.48411e-45	1.59312e-44	92.3372
ITGA9	-1.3601	3.04423	-14.7734	1.51623e-45	1.62659e-44	92.3159
CHAF1B	1.15383	3.72059	14.7704	1.5757e-45	1.68933e-44	92.2776
ABHD6	-1.0291	2.95372	-14.7694	1.59465e-45	1.70858e-44	92.2657
GIMAP7	-1.59623	4.92206	-14.7625	1.73886e-45	1.86194e-44	92.1796
PCNX1	-1.03144	3.72151	-14.756	1.88697e-45	2.01802e-44	92.0982
AMY2B	-1.03358	1.49992	-14.7544	1.92462e-45	2.057e-44	92.0786
PRSS8	1.81665	7.0902	14.7505	2.02241e-45	2.16017e-44	92.0292
SAMD10	1.06465	4.01667	14.7489	2.06279e-45	2.20193e-44	92.0096
CLDN8	-2.58868	3.21282	-14.7129	3.24354e-45	3.44734e-44	91.5592
MSRA	-1.01149	3.09092	-14.7045	3.60219e-45	3.8238e-44	91.4549
SHROOM4	-1.11712	2.43105	-14.6991	3.85672e-45	4.08641e-44	91.3869
CCL21	-3.25465	4.34536	-14.6799	4.90199e-45	5.18753e-44	91.1483
EGR3	-2.3613	3.7353	-14.6725	5.38294e-45	5.6895e-44	91.0552
IBSP	2.0744	1.95608	14.6693	5.60034e-45	5.91564e-44	91.0158
FLI1	-1.10166	3.20405	-14.6639	5.98873e-45	6.32201e-44	90.9491
CKAP2	1.20958	4.69516	14.6635	6.02239e-45	6.35364e-44	90.9435
AJM1	1.19352	2.10661	14.6583	6.42986e-45	6.77936e-44	90.8784
IRS2	-1.72162	3.81795	-14.6573	6.50618e-45	6.85562e-44	90.8666
TLCD2	-1.17156	2.8598	-14.6562	6.60162e-45	6.95193e-44	90.8522
XRCC2	1.2237	2.48865	14.6339	8.71807e-45	9.16944e-44	90.5755
DIAPH3	1.34139	2.27213	14.6331	8.80972e-45	9.26017e-44	90.5651
MFSD3	1.37635	5.47437	14.6169	1.07795e-44	1.13031e-43	90.3643
SLC14A2	-1.06057	0.596946	-14.6143	1.11393e-44	1.16661e-43	90.3316
CHEK1	1.33786	3.29374	14.6065	1.22767e-44	1.28494e-43	90.2349
TMEM170B	-1.07474	2.20603	-14.6002	1.32908e-44	1.3892e-43	90.1559
MAF	-1.13027	4.16117	-14.591	1.49038e-44	1.55423e-43	90.042
TMEM238	1.67258	4.10904	14.5861	1.58328e-44	1.65011e-43	89.9818
PLAAT5	-2.58091	2.953	-14.5671	2.00734e-44	2.08953e-43	89.7457
PDRG1	1.01953	5.68417	14.566	2.03476e-44	2.11679e-43	89.7322
KNSTRN	1.01548	4.07503	14.565	2.05966e-44	2.1414e-43	89.7201
RIBC2	1.27324	2.74584	14.5589	2.22151e-44	2.30828e-43	89.6448
ACAA2	-1.00645	4.87236	-14.5585	2.23325e-44	2.31908e-43	89.6396
PLD1	-1.1581	2.3651	-14.545	2.64135e-44	2.73625e-43	89.4726
LAMA2	-1.81849	3.23311	-14.5424	2.72898e-44	2.82532e-43	89.4402
ANTKMT	1.43874	4.24516	14.5356	2.97146e-44	3.0745e-43	89.3555
SKAP2	-1.28457	4.32006	-14.532	3.10652e-44	3.21038e-43	89.3112
ZNF502	-1.29771	2.43637	-14.525	3.38773e-44	3.49679e-43	89.225
CCDC78	1.71958	2.23097	14.5213	3.54891e-44	3.65876e-43	89.1788
ZNF296	1.36545	3.40819	14.5123	3.96625e-44	4.08657e-43	89.0682
SELENOP	-1.74005	4.78141	-14.5105	4.05956e-44	4.1802e-43	89.045
PPP1R37	1.09435	4.74159	14.5086	4.15752e-44	4.27852e-43	89.0213
TESMIN	1.65177	4.09393	14.5063	4.27546e-44	4.39725e-43	88.9935
TCEAL2	-1.30864	0.8151	-14.5032	4.4435e-44	4.56461e-43	88.9551
GPR68	1.3446	3.47741	14.4997	4.63971e-44	4.76333e-43	88.9121
USP53	-1.25733	3.66913	-14.497	4.79986e-44	4.9248e-43	88.8784
MRPL13	1.02708	5.18397	14.4893	5.27835e-44	5.41252e-43	88.7838
NVL	1.09507	4.8872	14.4863	5.48343e-44	5.61946e-43	88.7459
HSPE1	1.01415	5.16922	14.4854	5.54153e-44	5.67561e-43	88.7354
FOXP3	1.35298	2.43466	14.4761	6.22126e-44	6.36041e-43	88.6203
CLDN7	1.46616	6.54122	14.4539	8.18953e-44	8.35779e-43	88.3469
HSPA12B	-1.33762	3.50333	-14.441	9.6085e-44	9.8001e-43	88.1879
PLEK2	1.27998	4.0218	14.4409	9.62776e-44	9.81392e-43	88.1859
GPAT3	-1.35939	2.23718	-14.4333	1.05699e-43	1.07424e-42	88.093
BCAS4	1.56206	3.5712	14.4295	1.10851e-43	1.12593e-42	88.0457
ARHGEF28	-1.08206	2.45508	-14.3862	1.89299e-43	1.91708e-42	87.5133
TMEM71	-1.36842	1.58997	-14.3707	2.29257e-43	2.32039e-42	87.3228
MRC1	-1.84555	2.80609	-14.3689	2.34441e-43	2.37145e-42	87.3006
PCCA	-1.02434	3.27114	-14.3679	2.37253e-43	2.39849e-42	87.2887
PHLDB1	-1.10814	3.55252	-14.3625	2.53608e-43	2.56232e-42	87.2224
SCN7A	-1.16092	0.903953	-14.3606	2.59698e-43	2.62077e-42	87.1988
JUN	-1.51706	7.51297	-14.354	2.81525e-43	2.83605e-42	87.1185
DPY19L2	-1.02619	1.0788	-14.3394	3.37017e-43	3.3891e-42	86.9395
FAM43A	-1.09028	3.3639	-14.336	3.51515e-43	3.53077e-42	86.8976
KLF2	-1.50837	5.09729	-14.331	3.7399e-43	3.75213e-42	86.836
EPHA2	-1.22594	3.8036	-14.3246	4.04359e-43	4.05207e-42	86.7583
KLF10	-1.13287	6.17554	-14.3207	4.24346e-43	4.24989e-42	86.7103
TIE1	-1.15251	3.82068	-14.3082	4.95005e-43	4.9489e-42	86.5571
CYB561	1.19612	6.86103	14.3025	5.31054e-43	5.30005e-42	86.4872
HSD17B7	1.01391	3.42934	14.3005	5.43989e-43	5.42285e-42	86.4632
PFDN2	1.04096	7.8287	14.2847	6.61068e-43	6.57853e-42	86.2693
DPYD	-1.34684	3.62157	-14.2826	6.78392e-43	6.74311e-42	86.2436
DCAF13	1.01541	4.61523	14.2743	7.50824e-43	7.45015e-42	86.1427
E2F7	1.30446	1.7018	14.2738	7.55768e-43	7.49488e-42	86.1362
NFKBIE	1.04285	4.6899	14.2697	7.95044e-43	7.86622e-42	86.0858
PDGFRA	-1.64357	3.93703	-14.2638	8.54696e-43	8.45155e-42	86.0138
SMIM22	2.00203	4.24508	14.2622	8.71286e-43	8.61065e-42	85.9947
A2M	-1.4301	8.30446	-14.2593	9.03142e-43	8.9101e-42	85.959
LRP1	-1.54704	5.93933	-14.2505	1.00557e-42	9.90928e-42	85.8521
ADAMTS9	-1.26039	2.57252	-14.2456	1.06807e-42	1.05191e-41	85.7921
SEPHS2	1.07061	7.65613	14.2432	1.10075e-42	1.08348e-41	85.7621
CALB2	-2.55679	3.61657	-14.2415	1.12267e-42	1.10442e-41	85.7425
TCF7L2	-1.18624	4.02946	-14.237	1.18667e-42	1.16671e-41	85.6874
TNFRSF18	1.99741	3.82529	14.2311	1.27608e-42	1.2539e-41	85.6151
COX6C	2.05558	8.13951	14.2141	1.5714e-42	1.5432e-41	85.4081
ALYREF	1.10841	6.7162	14.2111	1.62958e-42	1.59851e-41	85.3719
ZNF367	1.26376	3.23607	14.1873	2.1813e-42	2.13606e-41	85.0818
CHST3	-1.56139	3.63614	-14.1849	2.24696e-42	2.1991e-41	85.0523
ITGA1	-1.10034	3.50614	-14.1839	2.27542e-42	2.22569e-41	85.0398
MFSD4A	-1.24964	1.51201	-14.175	2.53643e-42	2.47818e-41	84.9318
TNFSF4	1.33377	2.65463	14.1696	2.70952e-42	2.64428e-41	84.8662
PYROXD2	-1.2236	3.1795	-14.1557	3.21081e-42	3.12817e-41	84.6973
ARHGEF6	-1.51256	5.13153	-14.155	3.23771e-42	3.1526e-41	84.689
TM4SF18	-1.53345	3.95297	-14.1487	3.49634e-42	3.40057e-41	84.6126
FOXO4	-1.02376	4.55376	-14.1472	3.56179e-42	3.46227e-41	84.5941
STAC2	-3.59541	3.31003	-14.1412	3.83108e-42	3.72193e-41	84.5216
ANAPC11	1.03562	5.66392	14.1268	4.5649e-42	4.43234e-41	84.3473
DPP4	-1.23037	1.73387	-14.1228	4.79756e-42	4.65561e-41	84.2979
RILP	-1.02157	3.18716	-14.1205	4.93114e-42	4.77715e-41	84.2706
COBLL1	-1.21179	3.15835	-14.1065	5.85018e-42	5.6611e-41	84.1006
MYOM2	-1.1199	0.837367	-14.0896	7.18557e-42	6.94551e-41	83.8961
AVPI1	-1.05334	4.60985	-14.0888	7.25985e-42	7.01336e-41	83.8859
CTTNBP2	-1.33646	1.46034	-14.0803	8.04336e-42	7.75719e-41	83.7839
RGMA	-1.63607	2.07494	-14.0693	9.20344e-42	8.86108e-41	83.6499
ECHDC1	-1.20868	4.49646	-14.0692	9.215e-42	8.86724e-41	83.6487
MPDZ	-1.18508	3.68015	-14.0686	9.28176e-42	8.92649e-41	83.6415
PAXX	1.14351	5.95845	14.0633	9.89019e-42	9.50631e-41	83.5783
APOD	-3.21541	7.81881	-14.0508	1.15151e-41	1.10496e-40	83.4271
ADAM19	1.32823	3.26142	14.0503	1.15826e-41	1.11082e-40	83.4212
CCND2	-1.22075	3.9066	-14.0428	1.26964e-41	1.21628e-40	83.3299
ALPL	-1.7683	4.166	-14.0371	1.36093e-41	1.30301e-40	83.2609
KIFC2	1.54663	3.61701	14.0292	1.49747e-41	1.43293e-40	83.1658
ADGRA2	-1.42109	3.93931	-14.0267	1.54404e-41	1.47586e-40	83.1353
ARRDC1	1.0649	5.23128	14.0234	1.60633e-41	1.53454e-40	83.096
SASH1	-1.47165	4.32097	-14.0208	1.65707e-41	1.58214e-40	83.065
STXBP1	-1.15969	3.41062	-14.0144	1.7907e-41	1.70878e-40	82.9879
CCDC8	-1.86363	3.81794	-14.0135	1.8111e-41	1.72728e-40	82.9767
RRAGD	-1.34633	3.33946	-14.0006	2.1181e-41	2.01337e-40	82.8209
LRRC59	1.08693	6.81422	13.9991	2.15549e-41	2.04778e-40	82.8035
IRX1	-2.47643	2.65246	-13.9985	2.17181e-41	2.06214e-40	82.796
PARD3B	-1.00614	2.87234	-13.9973	2.2029e-41	2.0882e-40	82.7819
CD248	-1.39553	5.92147	-13.9919	2.35368e-41	2.2299e-40	82.716
TMOD2	-1.121	2.51438	-13.9857	2.53504e-41	2.39512e-40	82.6422
CCN1	-1.80537	7.18783	-13.985	2.55773e-41	2.41522e-40	82.6334
BCL9	1.1008	5.03493	13.9761	2.85006e-41	2.68832e-40	82.5257
FAM184A	-1.02703	1.51338	-13.9725	2.97748e-41	2.80542e-40	82.4822
CAB39L	-1.32872	4.59363	-13.9724	2.98065e-41	2.80688e-40	82.4812
CYTL1	-1.346	2.10762	-13.9548	3.68576e-41	3.46328e-40	82.27
SERPING1	-1.35946	6.98203	-13.954	3.71995e-41	3.4935e-40	82.2608
CDC7	1.30379	3.42031	13.9528	3.7782e-41	3.54627e-40	82.2454
LPCAT1	1.07666	5.5966	13.9374	4.54858e-41	4.25773e-40	82.0608
TMEM35A	-1.07359	1.05576	-13.9365	4.59612e-41	4.29988e-40	82.0505
YAP1	-1.18311	5.67721	-13.9275	5.12706e-41	4.78879e-40	81.9418
EMILIN3	-1.3321	0.723356	-13.9264	5.19166e-41	4.84648e-40	81.9293
LRP4	-1.19933	1.69743	-13.9232	5.40041e-41	5.03589e-40	81.8901
NR4A1	-2.00066	4.35013	-13.9175	5.78509e-41	5.39168e-40	81.8217
IL17RD	-1.56964	3.48163	-13.9144	6.00608e-41	5.58552e-40	81.7844
CDC25A	1.3603	2.61436	13.9133	6.08311e-41	5.6541e-40	81.7717
TMEM125	1.35881	5.15964	13.9132	6.09453e-41	5.66166e-40	81.7698
CABLES2	1.01229	4.03993	13.9126	6.13293e-41	5.69425e-40	81.7636
RASL12	-1.2706	3.49911	-13.9106	6.28266e-41	5.82698e-40	81.7396
FRMD3	-1.41366	2.19715	-13.9068	6.58107e-41	6.09716e-40	81.6935
RABEP2	1.12904	4.56941	13.8972	7.38467e-41	6.82695e-40	81.5789
CYGB	-1.26053	3.76289	-13.8953	7.55708e-41	6.98258e-40	81.5559
TMEM141	1.10622	5.51646	13.888	8.24884e-41	7.60948e-40	81.4688
FLYWCH2	1.06179	6.133	13.8857	8.48951e-41	7.82729e-40	81.4402
KLF8	-1.10423	2.30835	-13.8814	8.93455e-41	8.2332e-40	81.3894
BOP1	1.268	5.52087	13.8798	9.10823e-41	8.38875e-40	81.3703
CCDC137	1.00285	5.14816	13.8685	1.04365e-40	9.58641e-40	81.2349
BCL2L12	1.04043	4.49822	13.8658	1.07828e-40	9.8992e-40	81.2024
NEDD9	-1.45271	4.1952	-13.8616	1.13441e-40	1.04034e-39	81.152
SOX10	-3.30125	2.77915	-13.8614	1.13737e-40	1.0425e-39	81.1494
SERINC2	1.49682	7.34461	13.8586	1.17573e-40	1.07708e-39	81.1164
EMILIN2	-1.23069	3.17239	-13.8574	1.19242e-40	1.0918e-39	81.1024
PRKCA	-1.16656	1.86476	-13.851	1.28848e-40	1.17786e-39	81.0253
PPEF1	1.2075	1.70999	13.85	1.30337e-40	1.19084e-39	81.0139
SH3RF2	-1.37463	1.81104	-13.8465	1.35935e-40	1.24133e-39	80.9721
CFAP45	1.49398	2.41712	13.846	1.36744e-40	1.24806e-39	80.9662
SLC13A2	-2.18975	1.81573	-13.8446	1.39142e-40	1.26926e-39	80.9489
NLRP1	-1.0647	2.31116	-13.8428	1.42217e-40	1.29594e-39	80.9272
CREB3L4	1.60118	6.74563	13.8364	1.53565e-40	1.39565e-39	80.8508
ESAM	-1.05586	5.18028	-13.8294	1.66931e-40	1.51632e-39	80.7678
ADGRL2	-1.29222	2.58206	-13.8286	1.68579e-40	1.53048e-39	80.7581
SACS	-1.12236	2.3977	-13.8265	1.72829e-40	1.56823e-39	80.7333
CST2	2.32916	2.56246	13.8208	1.85203e-40	1.67874e-39	80.6645
BCL3	1.03585	6.06321	13.8201	1.86743e-40	1.69181e-39	80.6563
STARD10	1.89265	7.1299	13.8186	1.90182e-40	1.72115e-39	80.6382
PXDC1	-1.25492	5.39153	-13.8162	1.9579e-40	1.76911e-39	80.6093
EIF3L	-1.18106	6.6279	-13.8086	2.14396e-40	1.93519e-39	80.519
CAMSAP3	1.29487	4.71833	13.8076	2.16894e-40	1.95672e-39	80.5075
JAM3	-1.35902	2.92091	-13.804	2.26648e-40	2.04043e-39	80.4637
BIN1	-1.2734	3.33146	-13.7897	2.6882e-40	2.41629e-39	80.294
PTK6	1.73148	4.22591	13.7819	2.95155e-40	2.64885e-39	80.2011
CCN3	-1.61352	3.21723	-13.7789	3.05941e-40	2.74278e-39	80.1654
PRUNE2	-1.1694	1.42607	-13.7747	3.2178e-40	2.88177e-39	80.1152
CIP2A	1.27985	2.98003	13.7674	3.51085e-40	3.13931e-39	80.0285
SLIT2	-1.33901	2.73039	-13.7621	3.74059e-40	3.33952e-39	79.9655
OLFML1	-1.30339	3.70626	-13.762	3.7468e-40	3.34333e-39	79.9639
LEF1	1.5472	3.63567	13.7612	3.78313e-40	3.374e-39	79.9543
CAPN6	-2.47706	2.13144	-13.7583	3.91872e-40	3.4913e-39	79.9192
FOXO6	1.25	3.07933	13.7462	4.52881e-40	4.03066e-39	79.7754
PER2	-1.109	4.2743	-13.7392	4.9234e-40	4.37506e-39	79.6923
ABRACL	1.19055	6.68312	13.7236	5.93187e-40	5.26304e-39	79.507
ADAMTSL2	1.23243	2.7627	13.7206	6.14754e-40	5.45158e-39	79.4715
MYCBP2	-1.11342	3.95809	-13.7199	6.19819e-40	5.49366e-39	79.4633
MDFIC	-1.11391	4.72961	-13.7151	6.56491e-40	5.8157e-39	79.4062
SMYD3	1.17924	4.19217	13.7036	7.53202e-40	6.66557e-39	79.2695
PTX3	-2.13265	2.01744	-13.7032	7.56237e-40	6.68898e-39	79.2655
BVES	-1.033	1.60639	-13.6976	8.08365e-40	7.13537e-39	79.1993
GPRC5A	2.05084	6.57429	13.6953	8.31396e-40	7.33113e-39	79.1713
PLTP	-1.38041	6.24203	-13.6675	1.15733e-39	1.01583e-38	78.8424
ADAMTS18	-1.22866	0.981815	-13.649	1.44355e-39	1.26511e-38	78.6227
OLFML2A	-1.18527	4.54109	-13.6461	1.4937e-39	1.3084e-38	78.5888
ARHGAP31	-1.08876	3.83901	-13.6374	1.65642e-39	1.44945e-38	78.4859
ACSL4	-1.29004	4.28891	-13.6313	1.78201e-39	1.55776e-38	78.4133
TAGLN	-1.60002	6.72997	-13.6308	1.7909e-39	1.56473e-38	78.4083
SULT1C4	-1.31445	2.031	-13.6287	1.83753e-39	1.60466e-38	78.3828
KIF26A	-1.11798	1.85072	-13.6252	1.91436e-39	1.67091e-38	78.342
IFI6	2.3127	9.39489	13.6236	1.95125e-39	1.70224e-38	78.3231
MECOM	-1.09053	2.45401	-13.622	1.9889e-39	1.73421e-38	78.3041
CXCL11	2.34238	3.58804	13.6207	2.02003e-39	1.76046e-38	78.2886
KIRREL1	-1.40274	4.46618	-13.6176	2.09475e-39	1.82373e-38	78.2525
ARHGAP26	-1.12713	2.41705	-13.6151	2.15928e-39	1.87896e-38	78.2223
MATN3	1.99274	3.82852	13.6099	2.29784e-39	1.99852e-38	78.1605
DRAP1	1.02233	7.01554	13.5995	2.59974e-39	2.25766e-38	78.0378
SNCG	-2.4211	5.01774	-13.5805	3.25374e-39	2.81707e-38	77.8147
SYNDIG1	1.87222	2.8712	13.5753	3.46156e-39	2.99549e-38	77.7531
CDKN2D	1.03902	4.47976	13.5679	3.77804e-39	3.26771e-38	77.6661
PDGFA	-1.0998	3.95516	-13.567	3.81822e-39	3.3008e-38	77.6556
DHRS3	-1.10459	5.55573	-13.5647	3.92663e-39	3.3911e-38	77.6278
CPS1	-1.09489	1.209	-13.5641	3.9523e-39	3.41156e-38	77.6213
SLC9A3R1	1.68544	8.50092	13.5631	4.00179e-39	3.45255e-38	77.6089
MBNL2	-1.24021	5.62322	-13.5602	4.14006e-39	3.56826e-38	77.5751
BRIP1	1.20955	2.05852	13.5593	4.18291e-39	3.60338e-38	77.5649
CCNE2	1.28903	2.22421	13.5434	5.05214e-39	4.35e-38	77.3772
RFC4	1.00628	4.61851	13.5424	5.11193e-39	4.39928e-38	77.3655
SIPA1L3	1.04304	4.9085	13.5346	5.60322e-39	4.81485e-38	77.2743
NDNF	-1.55621	1.81491	-13.5332	5.69706e-39	4.89304e-38	77.2578
KLHDC1	-1.01405	2.2397	-13.5254	6.24861e-39	5.35604e-38	77.1659
N4BP3	1.4582	4.12999	13.523	6.42981e-39	5.50861e-38	77.1375
PPL	-1.38307	4.94936	-13.5152	7.0522e-39	6.03882e-38	77.0456
H2AC13	2.25888	2.5789	13.5087	7.61191e-39	6.51485e-38	76.9697
GFOD1	-1.00539	2.5328	-13.5042	8.02658e-39	6.86634e-38	76.9169
ABHD17C	1.22378	4.7495	13.5013	8.31089e-39	7.10249e-38	76.8823
STX1A	1.00496	2.64869	13.5008	8.3521e-39	7.13416e-38	76.8774
SGO2	1.0196	2.92349	13.4965	8.79426e-39	7.50437e-38	76.8261
MAL2	1.46528	7.53773	13.4941	9.04054e-39	7.71071e-38	76.7987
MMP1	3.00752	3.2349	13.4879	9.72393e-39	8.28124e-38	76.7262
FXYD6	-1.05461	2.09216	-13.4814	1.05043e-38	8.93253e-38	76.6495
COL14A1	-2.16817	4.77472	-13.4775	1.09965e-38	9.34187e-38	76.6039
SMIM3	-1.14053	4.94872	-13.4758	1.12162e-38	9.52381e-38	76.5843
STON1	-1.04608	2.31326	-13.4716	1.17858e-38	9.99261e-38	76.535
TCF15	-1.01168	1.0419	-13.4667	1.24915e-38	1.05753e-37	76.4772
BLM	1.13613	2.20329	13.4666	1.25104e-38	1.05861e-37	76.4757
SLC39A11	1.23366	5.67699	13.4661	1.25849e-38	1.06439e-37	76.4698
CYP39A1	-1.60785	1.94223	-13.462	1.32019e-38	1.11438e-37	76.4222
COL5A1	1.80144	6.71224	13.4528	1.47171e-38	1.24106e-37	76.3142
OVOL2	1.16039	4.38496	13.4447	1.61915e-38	1.36406e-37	76.2193
ECHDC3	-1.2755	4.86475	-13.4345	1.82394e-38	1.53432e-37	76.1009
HASPIN	1.08347	1.86768	13.4149	2.29802e-38	1.92841e-37	75.8712
PGM1	-1.02401	5.70407	-13.4047	2.58903e-38	2.16837e-37	75.7527
IKBKE	1.03508	3.87912	13.4022	2.66625e-38	2.23196e-37	75.7235
GDPD5	-1.20344	2.8567	-13.3936	2.94949e-38	2.46667e-37	75.6231
KCNJ8	-1.18623	3.54723	-13.3935	2.95419e-38	2.46939e-37	75.6215
SEPTIN10	-1.04072	5.45522	-13.3921	3.00263e-38	2.50866e-37	75.6053
MXD3	1.09008	2.46467	13.3807	3.43166e-38	2.86294e-37	75.4726
UST	-1.31527	2.73917	-13.3667	4.04569e-38	3.36703e-37	75.3089
TEAD1	-1.16043	4.56434	-13.3638	4.18567e-38	3.48184e-37	75.2751
SLC24A2	1.2139	1.18785	13.3616	4.29434e-38	3.57051e-37	75.2497
RNF157	-1.07163	1.2922	-13.3555	4.61053e-38	3.82785e-37	75.179
LRRC8C	-1.04796	2.85138	-13.3538	4.70648e-38	3.90374e-37	75.1586
PIGQ	1.08252	4.61435	13.3537	4.70903e-38	3.90398e-37	75.158
ARHGEF4	-1.08439	1.36063	-13.3509	4.86724e-38	4.03319e-37	75.1252
C7	-2.44949	2.72779	-13.3497	4.93325e-38	4.08592e-37	75.1118
TYMS	1.19922	3.06388	13.341	5.46675e-38	4.52343e-37	75.0097
LAMB3	-2.2102	4.9351	-13.3396	5.55589e-38	4.59276e-37	74.9936
TDO2	1.30655	1.47025	13.3306	6.1693e-38	5.09493e-37	74.8895
RBPMS2	-1.21181	2.73591	-13.3294	6.25908e-38	5.16412e-37	74.8752
FOLR2	-1.68589	4.29666	-13.3236	6.70004e-38	5.52528e-37	74.8075
TLL1	-1.14166	1.53806	-13.3165	7.28128e-38	5.9965e-37	74.7248
CANT1	1.15497	6.83329	13.3028	8.54398e-38	7.01897e-37	74.5658
MXRA7	-1.0625	4.52832	-13.2991	8.92159e-38	7.32218e-37	74.5228
CTNNAL1	-1.07191	4.64605	-13.2845	1.05692e-37	8.66612e-37	74.3544
ZFP36L2	-1.49531	6.49978	-13.2823	1.08494e-37	8.88741e-37	74.3284
FAM102A	1.10163	6.55277	13.2779	1.14221e-37	9.3476e-37	74.2772
EDN1	-1.74959	4.01934	-13.2747	1.18584e-37	9.70004e-37	74.24
TCP11L2	-1.00544	2.28199	-13.2734	1.20384e-37	9.84266e-37	74.225
PPP1R35	1.10593	4.0833	13.2422	1.73172e-37	1.41183e-36	73.8636
DIPK1A	-1.03251	4.06235	-13.2408	1.75904e-37	1.43342e-36	73.848
KDF1	1.12753	5.28261	13.2392	1.79291e-37	1.45964e-36	73.8291
ARRDC4	-1.14019	4.43101	-13.2357	1.866e-37	1.51842e-36	73.7893
PRX	-1.03812	2.15195	-13.2312	1.96702e-37	1.59911e-36	73.7369
SIX4	1.32085	3.41244	13.211	2.48814e-37	2.01703e-36	73.5033
WLS	-1.73515	4.98264	-13.2051	2.66443e-37	2.15893e-36	73.4353
WDR76	1.03592	3.6281	13.2024	2.74932e-37	2.22561e-36	73.4041
S100A14	2.57812	8.24329	13.1943	3.01886e-37	2.44037e-36	73.3112
SYNE4	1.31755	4.30846	13.1928	3.07292e-37	2.4829e-36	73.2935
ALDH3A1	-1.21837	0.586636	-13.1825	3.46423e-37	2.79513e-36	73.1744
TPPP	-1.47325	2.38097	-13.1709	3.96172e-37	3.19353e-36	73.041
GFER	1.01282	3.19597	13.1635	4.31639e-37	3.47129e-36	72.9558
CNGA1	-1.16396	1.0569	-13.1617	4.40667e-37	3.54223e-36	72.9352
LAMA4	-1.2085	4.85451	-13.1606	4.46289e-37	3.58575e-36	72.9226
TRIM2	-1.44606	2.70115	-13.1561	4.70016e-37	3.77286e-36	72.8711
IL21R	1.15421	1.54781	13.1513	4.97283e-37	3.98615e-36	72.8151
CTSG	-1.82779	2.07052	-13.1451	5.34005e-37	4.27452e-36	72.7443
H4C8	2.05205	4.30564	13.1421	5.5272e-37	4.42227e-36	72.71
ARTN	1.5782	2.17252	13.1394	5.70446e-37	4.56197e-36	72.6787
RMI1	1.01584	4.33794	13.1383	5.78062e-37	4.62073e-36	72.6655
MMP9	2.42091	5.53221	13.1266	6.61455e-37	5.28488e-36	72.5315
INTS6L	-1.05131	2.28255	-13.1224	6.94293e-37	5.53695e-36	72.4834
C1QTNF1	-1.34129	4.34289	-13.1165	7.43473e-37	5.92091e-36	72.4154
PI15	-2.7583	2.8	-13.1158	7.49592e-37	5.96688e-36	72.4072
GRHL2	1.22398	5.65156	13.1135	7.69678e-37	6.12109e-36	72.3809
PRG4	-1.85098	1.68245	-13.1115	7.87779e-37	6.25925e-36	72.3578
SNCAIP	-1.00861	1.32591	-13.1051	8.48215e-37	6.73322e-36	72.2844
GAS1	-1.62879	4.77028	-13.1027	8.72185e-37	6.91711e-36	72.2567
LGR4	-1.55259	3.98469	-13.1021	8.77832e-37	6.95547e-36	72.2503
SOCS2	-1.64806	3.0396	-13.0907	1.00204e-36	7.92134e-36	72.1187
ACKR3	-1.47901	5.44711	-13.0793	1.14176e-36	9.00104e-36	71.989
SEMA5A	-1.49896	3.38902	-13.0777	1.16364e-36	9.16516e-36	71.9701
ADM	-1.7589	3.75108	-13.0744	1.20926e-36	9.52011e-36	71.9319
PELI1	-1.16664	4.67924	-13.051	1.58194e-36	1.2437e-35	71.6649
SATB1	-1.25566	2.66848	-13.0471	1.65615e-36	1.30085e-35	71.6194
ANKRD65	-1.38338	3.07215	-13.0441	1.71249e-36	1.34449e-35	71.5861
SPART	-1.08856	4.64857	-13.037	1.85892e-36	1.45812e-35	71.5046
ESRP2	1.18013	5.04133	13.0274	2.07721e-36	1.62786e-35	71.3942
MXI1	-1.04301	4.84003	-13.0139	2.42608e-36	1.89866e-35	71.24
IRAG1	-1.12173	3.1584	-13.0072	2.61873e-36	2.0485e-35	71.164
SRMS	1.73074	3.2259	13.0059	2.65706e-36	2.07753e-35	71.1496
ALB	-2.55558	1.65472	-12.997	2.94497e-36	2.30055e-35	71.0473
PLAC1	1.30069	1.31633	12.9873	3.28981e-36	2.56644e-35	70.9373
C9orf116	1.51323	3.69777	12.9814	3.52275e-36	2.74567e-35	70.8693
COL4A6	-1.54978	1.43207	-12.9787	3.63245e-36	2.82989e-35	70.8388
H2BC17	1.48174	1.58468	12.9772	3.69589e-36	2.87801e-35	70.8216
CEMIP	1.7225	2.65019	12.9761	3.7395e-36	2.90933e-35	70.81
RASD1	-2.03997	4.85433	-12.975	3.78924e-36	2.94669e-35	70.7968
RPS6KA3	-1.16769	3.84984	-12.968	4.10631e-36	3.19037e-35	70.717
TRAF4	1.08958	5.69944	12.9676	4.12304e-36	3.20048e-35	70.7129
GSTM2	-1.26533	1.81224	-12.9572	4.64887e-36	3.60052e-35	70.5937
TUBB6	-1.22447	5.45203	-12.9514	4.96325e-36	3.83708e-35	70.5286
C13orf46	-1.11855	1.17913	-12.9462	5.27262e-36	4.06894e-35	70.4685
FAM166B	-1.20032	1.43542	-12.9437	5.42418e-36	4.18402e-35	70.4404
RIPPLY3	1.55323	2.09505	12.94	5.65974e-36	4.36376e-35	70.3981
NR4A3	-1.49788	1.88457	-12.922	6.94855e-36	5.34787e-35	70.1943
CPNE8	-1.06233	2.52143	-12.9086	8.09837e-36	6.22444e-35	70.0421
CAMK2N2	1.36512	1.91815	12.9034	8.59054e-36	6.59978e-35	69.9835
COMTD1	1.24754	3.87192	12.9033	8.60697e-36	6.60945e-35	69.9816
RAMP1	2.20751	4.60297	12.8883	1.02113e-35	7.82407e-35	69.8117
PCDHB4	-1.26215	2.38109	-12.8867	1.04041e-35	7.96814e-35	69.7932
KDR	-1.10727	4.56541	-12.8865	1.04242e-35	7.97996e-35	69.7912
ADCK5	1.0425	3.6797	12.8374	1.82398e-35	1.38826e-34	69.2353
HOXC13	2.00374	3.26448	12.837	1.83173e-35	1.39354e-34	69.2311
METRN	1.77514	5.00661	12.8284	2.02032e-35	1.53566e-34	69.1337
H2BC4	1.94829	4.15503	12.8253	2.09137e-35	1.58896e-34	69.0994
FANCA	1.06237	2.01315	12.8249	2.10229e-35	1.59655e-34	69.0942
NTRK3	-1.11776	0.890472	-12.8229	2.14991e-35	1.63128e-34	69.0719
PDE9A	-1.31495	2.47853	-12.8185	2.26075e-35	1.71462e-34	69.022
SDSL	1.10354	4.6017	12.8145	2.36486e-35	1.79279e-34	68.9773
PRR7	1.2464	2.63601	12.812	2.43443e-35	1.84471e-34	68.9485
TMEM97	1.27184	5.24265	12.8033	2.68653e-35	2.03216e-34	68.8505
CREB3L1	1.77111	5.38745	12.7917	3.06191e-35	2.31203e-34	68.7206
PPDPF	1.08402	9.67065	12.7831	3.37627e-35	2.54605e-34	68.6235
CPAMD8	-1.4579	2.07868	-12.7768	3.62603e-35	2.732e-34	68.5526
CPXM2	-1.53365	4.26859	-12.7523	4.78812e-35	3.59653e-34	68.2764
DOC2B	-1.51851	2.66484	-12.7409	5.44735e-35	4.08278e-34	68.1482
ZNF727	-1.23057	1.43991	-12.7376	5.65026e-35	4.23301e-34	68.1119
GNG7	-1.26325	3.21156	-12.7282	6.28264e-35	4.69654e-34	68.0065
PRICKLE2	-1.04419	2.5802	-12.7193	6.95164e-35	5.18987e-34	67.9059
NRP1	-1.07204	4.84491	-12.7024	8.4085e-35	6.25578e-34	67.7169
ANXA3	-1.85924	3.85535	-12.7022	8.4324e-35	6.27084e-34	67.7141
SLC4A4	-1.42513	0.911624	-12.7012	8.52569e-35	6.33474e-34	67.7031
HOXA10	-1.1153	1.58741	-12.694	9.24807e-35	6.86851e-34	67.6223
HPD	-1.01391	0.748065	-12.6895	9.72653e-35	7.21451e-34	67.5722
BCHE	-1.45484	1.1951	-12.6792	1.09294e-34	8.09273e-34	67.4564
MAPK8IP2	1.85228	3.62498	12.677	1.11971e-34	8.28739e-34	67.4323
ACADS	-1.31256	4.50195	-12.6742	1.15534e-34	8.53638e-34	67.4012
NES	-1.35697	5.45514	-12.672	1.18464e-34	8.74916e-34	67.3763
TBX18	-1.04132	1.74773	-12.6679	1.24121e-34	9.15123e-34	67.33
ZDBF2	-1.13323	1.6096	-12.664	1.29711e-34	9.55511e-34	67.2862
SLC7A5	1.9023	5.49278	12.6485	1.54422e-34	1.13657e-33	67.113
GSPT2	-1.38457	3.23581	-12.644	1.62301e-34	1.19405e-33	67.0636
RASGRF2	-1.02767	2.24603	-12.6418	1.66525e-34	1.22461e-33	67.038
TSTD1	1.15271	7.02754	12.638	1.73795e-34	1.27752e-33	66.9956
CYSRT1	1.29188	2.39944	12.6365	1.76569e-34	1.29736e-33	66.9798
KRT14	-3.75942	5.59334	-12.6329	1.83924e-34	1.35024e-33	66.9393
TIPARP	-1.14893	4.87269	-12.6267	1.97154e-34	1.44552e-33	66.8703
PDZRN3	-1.30025	4.00491	-12.6193	2.14317e-34	1.56868e-33	66.7874
THRA	-1.011	4.5136	-12.6159	2.22734e-34	1.62959e-33	66.7491
KLK7	-2.52101	2.18338	-12.6041	2.54038e-34	1.85625e-33	66.6185
DDIAS	1.093	2.44751	12.6004	2.64788e-34	1.93315e-33	66.5773
RAB11FIP4	1.08276	3.46755	12.6003	2.65087e-34	1.93451e-33	66.5762
BIK	1.58713	5.15176	12.5998	2.66572e-34	1.94453e-33	66.5706
CLPSL2	1.82329	2.39794	12.5938	2.85425e-34	2.08029e-33	66.5027
HSH2D	1.80489	3.68169	12.5788	3.37532e-34	2.45382e-33	66.3362
MAP1B	-1.36416	4.02336	-12.577	3.44193e-34	2.50118e-33	66.3167
CNR1	-1.16	0.977834	-12.5768	3.45107e-34	2.50677e-33	66.3141
CAPS	1.83735	4.59437	12.5663	3.88026e-34	2.81258e-33	66.1977
TNNT1	2.93221	3.95365	12.5546	4.42307e-34	3.20197e-33	66.0676
MPP6	-1.0577	1.72593	-12.5541	4.44896e-34	3.21936e-33	66.0618
COLCA2	-1.00508	1.23613	-12.5535	4.47665e-34	3.23668e-33	66.0556
TAT	-3.11185	2.04125	-12.5499	4.66346e-34	3.36891e-33	66.015
MCM2	1.3698	4.2999	12.5419	5.09754e-34	3.67939e-33	65.9266
SORD	1.34781	3.55924	12.54	5.20832e-34	3.75777e-33	65.9053
ZNF423	-1.12756	2.2012	-12.5316	5.72112e-34	4.11911e-33	65.812
FMNL2	-1.17994	3.94439	-12.5166	6.76659e-34	4.85962e-33	65.6453
EPS8	-1.11816	4.53934	-12.5017	7.9831e-34	5.72372e-33	65.481
CCDC80	-1.73687	5.55857	-12.4988	8.24921e-34	5.90959e-33	65.4485
TUBB2B	-1.83072	2.53018	-12.4892	9.18427e-34	6.57122e-33	65.3418
SLC2A1	1.25684	5.59566	12.4863	9.47716e-34	6.77514e-33	65.3106
BHLHE41	-1.47685	5.08525	-12.4841	9.71868e-34	6.94491e-33	65.2856
WNT11	-1.78975	2.299	-12.4767	1.05495e-33	7.5292e-33	65.2041
SLC39A4	1.34562	3.65596	12.4756	1.06857e-33	7.62009e-33	65.1914
RCAN2	-1.01335	3.59084	-12.4726	1.10458e-33	7.86708e-33	65.1585
CAPG	1.09144	7.85267	12.4717	1.11555e-33	7.94197e-33	65.1487
SYNGR3	1.23495	1.57565	12.467	1.17561e-33	8.35914e-33	65.0966
SLC35F3	-1.49246	1.45812	-12.4633	1.22469e-33	8.7009e-33	65.0559
HAAO	-1.14456	2.67119	-12.4621	1.2406e-33	8.81031e-33	65.0431
MUC15	-2.04978	1.78814	-12.4539	1.36026e-33	9.64789e-33	64.9517
SMKR1	1.42363	3.25269	12.4538	1.36079e-33	9.64789e-33	64.9513
SGCB	-1.02712	5.12308	-12.4412	1.56595e-33	1.10842e-32	64.8118
LOXL1	1.28497	5.37339	12.4313	1.74796e-33	1.23522e-32	64.7026
OGFRL1	-1.20748	4.67134	-12.4256	1.86143e-33	1.31432e-32	64.6401
SIAH2	1.34165	6.63607	12.4195	1.99106e-33	1.40527e-32	64.5732
RNF145	-1.18528	4.97542	-12.4186	2.0115e-33	1.41911e-32	64.5631
ETV5	-1.14336	3.60463	-12.4155	2.0811e-33	1.46762e-32	64.5293
NCOA7	-1.3346	4.32448	-12.4046	2.34925e-33	1.65197e-32	64.4089
NEUROG2	-1.06302	0.433632	-12.3979	2.53115e-33	1.77843e-32	64.3349
KREMEN2	1.44734	1.69309	12.3976	2.54001e-33	1.78324e-32	64.3314
ZBTB12	1.00758	3.65985	12.3976	2.54008e-33	1.78324e-32	64.3314
EPHB6	-1.41602	2.20052	-12.3815	3.03581e-33	2.12606e-32	64.1543
MFGE8	-1.51333	5.99962	-12.3804	3.07303e-33	2.15037e-32	64.1422
MB	1.60754	4.98078	12.3779	3.15681e-33	2.2063e-32	64.1155
MPPED2	-1.10223	1.27171	-12.3669	3.56437e-33	2.48811e-32	63.9949
VSTM4	-1.17904	2.96268	-12.3578	3.94418e-33	2.74877e-32	63.8943
SLC6A14	-2.17882	1.76992	-12.3548	4.07534e-33	2.83788e-32	63.8618
H2AC20	1.21656	2.30383	12.3489	4.35188e-33	3.02554e-32	63.7966
LDHD	-1.48764	3.14275	-12.3399	4.80775e-33	3.33977e-32	63.6977
L3MBTL4	-1.11561	1.37058	-12.3338	5.14177e-33	3.56604e-32	63.6309
RAB3A	1.05142	3.53505	12.3283	5.46091e-33	3.78585e-32	63.5711
MICAL2	1.17275	3.85601	12.3271	5.53581e-33	3.83468e-32	63.5576
RPS6KA2	-1.01037	4.09933	-12.2979	7.63461e-33	5.27365e-32	63.2384
PRRT3	1.40039	3.56952	12.2892	8.39842e-33	5.79893e-32	63.1437
ZDHHC2	-1.27207	3.20071	-12.284	8.89698e-33	6.13577e-32	63.0864
EPHA4	-1.18846	2.47792	-12.27	1.03764e-32	7.13032e-32	62.9336
PCDHGA2	-1.00896	1.19962	-12.2679	1.06164e-32	7.2923e-32	62.9109
RRAS2	-1.15094	3.83215	-12.265	1.09617e-32	7.52345e-32	62.8791
ABCA1	-1.09654	3.78002	-12.2646	1.10164e-32	7.55497e-32	62.8742
ANKRD22	1.33595	2.77154	12.2631	1.11883e-32	7.66981e-32	62.8588
IRAK3	-1.28112	2.14601	-12.2619	1.13427e-32	7.76947e-32	62.8452
RBPMS	-1.08546	4.54588	-12.2587	1.17511e-32	8.04597e-32	62.8101
KRT5	-3.51397	5.41861	-12.2553	1.21951e-32	8.34667e-32	62.7732
LPIN1	-1.06764	3.41829	-12.2527	1.25497e-32	8.57912e-32	62.7448
ADCY5	-1.83038	2.46406	-12.2515	1.27104e-32	8.67838e-32	62.7321
TCN2	-1.01925	4.80105	-12.2509	1.27931e-32	8.72818e-32	62.7257
CFH	-1.30775	4.3734	-12.2506	1.28431e-32	8.75882e-32	62.7218
BBC3	1.1523	3.57153	12.2486	1.31213e-32	8.94142e-32	62.7006
C1orf115	-1.55268	5.6328	-12.2394	1.45133e-32	9.87823e-32	62.6004
TMCC3	-1.05627	2.8028	-12.2387	1.46257e-32	9.95079e-32	62.5928
BTBD11	-1.02465	1.54571	-12.2303	1.60501e-32	1.09026e-31	62.5005
PRRG1	-1.02855	2.53266	-12.2218	1.76116e-32	1.19398e-31	62.4083
ZNF462	-1.28716	2.52957	-12.2215	1.76701e-32	1.19747e-31	62.405
TRIM29	-2.36232	3.36145	-12.2203	1.78944e-32	1.21219e-31	62.3925
ABLIM3	-1.69024	3.81411	-12.2202	1.79231e-32	1.21366e-31	62.3909
ELOVL3	-1.17292	1.32714	-12.2148	1.90143e-32	1.28653e-31	62.3322
OLFM4	-2.74607	2.28664	-12.2049	2.11877e-32	1.4319e-31	62.2247
ST14	1.20692	6.89274	12.2038	2.14428e-32	1.44857e-31	62.2128
HOXC11	1.95275	2.52106	12.1913	2.45942e-32	1.6582e-31	62.0766
MZT2A	1.1493	4.72918	12.1687	3.14861e-32	2.11458e-31	61.8313
KLK5	-2.94592	3.08557	-12.1679	3.17373e-32	2.13062e-31	61.8234
TFPT	1.0741	5.06712	12.1674	3.19129e-32	2.14157e-31	61.818
LGR6	-1.96533	2.21577	-12.1512	3.80929e-32	2.5523e-31	61.6422
DSEL	-1.11433	1.91773	-12.1509	3.82392e-32	2.5611e-31	61.6384
FZD7	-1.38745	5.3349	-12.1452	4.06857e-32	2.72072e-31	61.5768
STAP2	1.06359	5.40055	12.1353	4.5321e-32	3.02716e-31	61.4697
LAMC1	-1.1262	6.53757	-12.1351	4.53838e-32	3.03017e-31	61.4683
ADRB1	-1.24123	0.889278	-12.135	4.54734e-32	3.03498e-31	61.4663
ZNF662	-1.21807	2.18925	-12.1295	4.82409e-32	3.21718e-31	61.4077
OSBPL1A	-1.01947	4.77874	-12.124	5.12134e-32	3.41012e-31	61.3483
SPAG1	1.04658	3.58778	12.12	5.35145e-32	3.55921e-31	61.3047
H2BC6	1.23403	1.61778	12.1161	5.58126e-32	3.70919e-31	61.2629
PHLDB2	-1.24245	3.26027	-12.0993	6.70172e-32	4.44522e-31	61.0813
OXGR1	-1.27615	0.986136	-12.0953	6.99902e-32	4.63706e-31	61.0382
PRSS22	1.31649	4.04662	12.0953	7.0018e-32	4.63711e-31	61.0378
TAC1	-1.11368	0.814576	-12.0927	7.1997e-32	4.76634e-31	61.0101
PC	-1.08873	4.24052	-12.0909	7.34363e-32	4.85975e-31	60.9904
FILIP1L	-1.26857	4.5068	-12.0854	7.79547e-32	5.15479e-31	60.9311
ATP13A5	-1.51876	1.16664	-12.0734	8.88547e-32	5.87104e-31	60.8012
PIP5K1B	-1.31779	1.71857	-12.0521	1.11939e-31	7.36802e-31	60.5719
CCL13	-1.76083	2.1447	-12.0508	1.1343e-31	7.4633e-31	60.5588
DKK3	-1.30315	4.01715	-12.0473	1.17814e-31	7.74581e-31	60.5211
S100A11	1.01491	11.1407	12.0425	1.24164e-31	8.15704e-31	60.469
EPS8L1	1.34579	4.34625	12.0405	1.26851e-31	8.33039e-31	60.4477
CRACD	1.26379	1.76415	12.0383	1.29891e-31	8.52674e-31	60.4242
NT5E	-1.23332	3.82616	-12.0355	1.33993e-31	8.79271e-31	60.3933
MITF	-1.03436	2.96167	-12.032	1.39143e-31	9.12713e-31	60.3559
DEFB1	-2.50329	3.43469	-12.0159	1.65643e-31	1.082e-30	60.1828
PARM1	-1.40363	4.36771	-12.0118	1.72993e-31	1.12958e-30	60.1397
RSPO1	-1.39794	1.36992	-12.0093	1.77906e-31	1.16078e-30	60.1119
TIMP1	1.04477	9.29177	12.008	1.80271e-31	1.17487e-30	60.0988
NKAIN1	2.76599	3.95654	12.0052	1.85811e-31	1.21052e-30	60.0687
NPR3	-1.56564	2.1389	-12.0037	1.88982e-31	1.23071e-30	60.0519
GSTA1	-2.09988	1.42877	-12.003	1.90257e-31	1.23854e-30	60.0453
TFR2	1.12589	1.39519	11.9981	2.00636e-31	1.30463e-30	59.9925
RAB19	1.10546	2.50247	11.9971	2.02951e-31	1.31869e-30	59.9811
OSCAR	1.01355	3.02561	11.9926	2.12871e-31	1.38001e-30	59.9338
MRAP2	-1.31967	1.58196	-11.9909	2.16991e-31	1.40619e-30	59.9147
H2BC9	1.63354	2.40783	11.9892	2.2095e-31	1.4313e-30	59.8968
ST8SIA2	-1.00312	0.876393	-11.9853	2.30326e-31	1.48923e-30	59.8555
HRCT1	-2.03219	2.60588	-11.9817	2.39448e-31	1.54705e-30	59.817
SLC2A12	-1.06402	1.09395	-11.9508	3.34295e-31	2.15257e-30	59.4857
ERBB3	1.38001	6.9744	11.9273	4.30278e-31	2.7644e-30	59.2351
FGL2	-1.35579	4.06424	-11.9253	4.39572e-31	2.822e-30	59.2139
SGCE	-1.18079	2.56923	-11.9188	4.71666e-31	3.02578e-30	59.1439
H2BC8	1.97895	3.91543	11.9111	5.12067e-31	3.28005e-30	59.0623
STX19	-1.33214	1.51673	-11.9089	5.24571e-31	3.3589e-30	59.0384
EPYC	1.88856	1.86706	11.903	5.58956e-31	3.57507e-30	58.9754
NTHL1	1.02732	4.4863	11.9014	5.68247e-31	3.6318e-30	58.959
RASL11A	-1.1853	3.00234	-11.8985	5.86404e-31	3.74366e-30	58.9278
CCNP	1.81858	2.91428	11.8782	7.28918e-31	4.64314e-30	58.7118
FOXS1	1.0202	2.97221	11.8752	7.52517e-31	4.78991e-30	58.6802
ADRA2A	-1.65453	4.0284	-11.8739	7.63237e-31	4.85635e-30	58.6661
H1-2	1.81718	7.75091	11.8734	7.67476e-31	4.88151e-30	58.6606
OR2B6	1.09699	1.11668	11.8724	7.75933e-31	4.93348e-30	58.6498
DSG1	-1.46889	0.760144	-11.8605	8.80797e-31	5.59815e-30	58.5239
CTSD	1.2014	7.88236	11.8584	9.01083e-31	5.72496e-30	58.5013
FGD5	-1.12541	3.56507	-11.8576	9.08581e-31	5.77046e-30	58.4931
IL34	-1.64494	3.33579	-11.8434	1.05829e-30	6.70393e-30	58.3417
NLGN4X	-1.30375	1.62144	-11.8381	1.11951e-30	7.08392e-30	58.2859
C16orf89	-2.35197	3.21396	-11.8335	1.17639e-30	7.43837e-30	58.2367
XG	-1.21029	2.40822	-11.8286	1.23961e-30	7.82657e-30	58.1847
H2BC11	1.52156	2.88135	11.8262	1.27095e-30	8.02152e-30	58.1599
MAP3K8	-1.10076	3.64324	-11.8045	1.60254e-30	1.00921e-29	57.9298
ZNF239	1.01785	4.07968	11.8023	1.64131e-30	1.03324e-29	57.9061
TICRR	1.04417	1.92055	11.8002	1.67753e-30	1.05566e-29	57.8844
ARHGEF16	1.03286	3.92205	11.7986	1.70706e-30	1.07385e-29	57.8671
DMTN	-1.33887	3.95525	-11.7948	1.77665e-30	1.1164e-29	57.8275
DNAJC1	1.15795	6.60982	11.7746	2.20468e-30	1.38182e-29	57.6132
TTLL12	1.11413	6.03761	11.7739	2.22177e-30	1.39203e-29	57.6055
RHBDL1	1.44969	2.59266	11.7703	2.30853e-30	1.44586e-29	57.5675
PRR15L	1.63893	6.39455	11.7669	2.39137e-30	1.49665e-29	57.5325
ZNF467	1.22157	4.52034	11.7657	2.42364e-30	1.51575e-29	57.5192
NECAB3	1.12629	4.89129	11.7642	2.46199e-30	1.53917e-29	57.5036
APBB1IP	-1.08766	3.88403	-11.7507	2.84186e-30	1.77408e-29	57.3612
POSTN	1.87603	8.85787	11.7246	3.75037e-30	2.33444e-29	57.0859
ZNF471	-1.09899	2.1761	-11.7164	4.08985e-30	2.54391e-29	56.9999
NECTIN4	1.3079	6.10538	11.7103	4.36313e-30	2.70997e-29	56.9357
MPZ	-1.27096	1.42469	-11.7075	4.49506e-30	2.78989e-29	56.9061
RAB6B	-1.07929	2.32634	-11.7042	4.65606e-30	2.88877e-29	56.8712
LMO3	-1.26679	1.32524	-11.6964	5.05718e-30	3.13424e-29	56.7892
DOP1B	1.03645	4.85609	11.6951	5.12647e-30	3.17604e-29	56.7757
MBOAT2	1.19653	4.85381	11.6876	5.55005e-30	3.43228e-29	56.6969
ZNF385D	-1.09343	1.40516	-11.6679	6.8315e-30	4.21264e-29	56.4907
MAP3K5	-1.01547	3.94802	-11.6486	8.38305e-30	5.16014e-29	56.2876
ABCC6	-1.14943	1.57893	-11.6426	8.92829e-30	5.49379e-29	56.2251
FSTL1	-1.25575	7.00427	-11.6326	9.92206e-30	6.09873e-29	56.1203
FKBP10	1.09656	6.83612	11.6234	1.09291e-29	6.70811e-29	56.0244
COL5A2	1.61584	7.40278	11.6081	1.28408e-29	7.86462e-29	55.8644
GCNT4	-1.07212	1.57197	-11.6052	1.32408e-29	8.10677e-29	55.834
NAV2	-1.32176	3.1534	-11.5924	1.51417e-29	9.2574e-29	55.7009
HOXD4	-1.11777	1.70381	-11.5894	1.56362e-29	9.55293e-29	55.669
APOBEC3B	1.52662	2.97714	11.5893	1.5648e-29	9.55671e-29	55.6682
MUC1	2.25584	7.49302	11.5589	2.15335e-29	1.31093e-28	55.3514
ACSL5	-1.16816	3.83663	-11.5538	2.27264e-29	1.38257e-28	55.2979
GOLT1A	1.35917	4.15232	11.5343	2.78803e-29	1.69132e-28	55.0951
CCNE1	1.45034	2.81794	11.5274	2.99432e-29	1.81518e-28	55.0243
DLK1	-1.69769	0.658657	-11.5243	3.09394e-29	1.87425e-28	54.9918
STS	-1.01227	3.03925	-11.5223	3.16059e-29	1.91395e-28	54.9706
EFNA4	1.15214	5.57783	11.5097	3.60401e-29	2.1771e-28	54.8404
ST6GALNAC1	-1.10572	1.11203	-11.4978	4.08111e-29	2.46184e-28	54.717
AGPAT2	-1.09199	6.60602	-11.4887	4.4884e-29	2.70374e-28	54.6226
SPP1	2.03948	7.38269	11.4737	5.25153e-29	3.15128e-28	54.4668
ILDR1	1.07446	3.89998	11.4603	6.03438e-29	3.61096e-28	54.329
HBEGF	-1.02092	3.59589	-11.4506	6.68063e-29	3.99212e-28	54.228
PLCH2	-1.1155	1.65133	-11.45	6.71897e-29	4.01224e-28	54.2223
H2BC21	1.5482	6.35678	11.4415	7.3401e-29	4.3801e-28	54.1346
NME3	1.21755	6.59061	11.4248	8.7369e-29	5.20639e-28	53.9618
YBX3	-1.20401	5.41944	-11.4153	9.63755e-29	5.73713e-28	53.8644
PI3	-2.55391	2.26412	-11.4012	1.11566e-28	6.63449e-28	53.7192
SLC16A11	-1.02591	1.18369	-11.4001	1.12844e-28	6.70818e-28	53.7079
LRRC56	1.28259	3.35934	11.393	1.21527e-28	7.2119e-28	53.6344
PPM1J	1.27598	2.70797	11.3926	1.22003e-28	7.23515e-28	53.6305
EPB41L4B	-1.05083	3.78868	-11.3886	1.27144e-28	7.53483e-28	53.5895
LIMCH1	-1.31337	4.52547	-11.3828	1.35128e-28	8.00248e-28	53.5291
RARB	-1.09952	2.88565	-11.3718	1.51379e-28	8.95254e-28	53.4165
ARRB1	-1.04991	4.08553	-11.3482	1.93355e-28	1.13841e-27	53.1737
H2AC8	1.83648	4.15828	11.3458	1.98098e-28	1.16513e-27	53.1496
LRFN1	1.00421	2.73761	11.3428	2.04359e-28	1.20072e-27	53.1188
ARHGAP36	-1.74332	0.866083	-11.3413	2.0751e-28	1.21882e-27	53.1036
RNASE1	-1.20809	8.14586	-11.3358	2.1958e-28	1.28883e-27	53.0475
MYRIP	-1.12731	1.77562	-11.3277	2.38941e-28	1.40056e-27	52.9637
CCR8	1.06495	1.22362	11.3272	2.40133e-28	1.40707e-27	52.9587
H4C4	1.25962	1.4686	11.3269	2.40939e-28	1.41131e-27	52.9554
BEND5	-1.01262	2.46151	-11.3224	2.52414e-28	1.47802e-27	52.9093
C2CD4B	-1.38859	1.66632	-11.3167	2.67655e-28	1.56567e-27	52.8511
TMEM213	-1.27927	0.808091	-11.307	2.95652e-28	1.72591e-27	52.7524
RAC3	1.1169	5.28046	11.3059	2.99045e-28	1.74453e-27	52.7411
ANO9	1.11593	3.14015	11.3043	3.04216e-28	1.77409e-27	52.7241
TLR3	-1.03189	2.73965	-11.3023	3.1033e-28	1.80791e-27	52.7043
ITGA6	-1.28891	5.75781	-11.2934	3.40275e-28	1.97767e-27	52.613
CCDC24	1.02936	3.87099	11.2924	3.43578e-28	1.99619e-27	52.6034
TMEM184A	1.16007	3.20777	11.2856	3.68547e-28	2.13837e-27	52.5338
TSPAN13	1.31044	8.6641	11.2806	3.88132e-28	2.25125e-27	52.4824
AKT3	-1.18525	3.21695	-11.2793	3.93318e-28	2.28055e-27	52.4693
NCMAP	-1.51278	1.58799	-11.2658	4.52038e-28	2.61573e-27	52.3312
ROR1	-1.02367	1.93487	-11.2618	4.71005e-28	2.72274e-27	52.2905
MZT2B	1.01411	5.58595	11.2582	4.88816e-28	2.82475e-27	52.2536
AK4	-1.40985	4.15799	-11.2511	5.25612e-28	3.0333e-27	52.1816
CORO2A	1.21449	4.81392	11.2451	5.58979e-28	3.22262e-27	52.1206
PKP1	-2.20109	3.25555	-11.2339	6.26941e-28	3.60596e-27	52.0068
ETV1	-1.02178	2.45709	-11.2283	6.63904e-28	3.81345e-27	51.95
SULF1	1.47114	6.22195	11.2109	7.93671e-28	4.54062e-27	51.7729
EDA2R	-1.03358	2.24586	-11.2004	8.83848e-28	5.05316e-27	51.6661
FOLR1	-2.33996	2.70708	-11.1921	9.61744e-28	5.48938e-27	51.5824
EVA1C	-1.08881	3.61014	-11.1887	9.95731e-28	5.67772e-27	51.5479
PNPLA7	-1.01442	2.46908	-11.1859	1.02495e-27	5.83852e-27	51.5192
RAB7B	-1.14584	3.05451	-11.1822	1.06505e-27	6.05889e-27	51.4812
H2BU1	1.30386	1.76989	11.1783	1.10838e-27	6.30125e-27	51.4416
SLC28A3	-1.74664	1.98993	-11.1678	1.23382e-27	7.00974e-27	51.3353
PDE5A	-1.28583	3.06749	-11.1636	1.28784e-27	7.3094e-27	51.2928
RTL5	-1.06852	2.9175	-11.1615	1.31548e-27	7.46134e-27	51.2717
GOLGA8A	-1.31724	2.80444	-11.1537	1.42357e-27	8.06377e-27	51.1934
SOCS3	-1.30695	6.14445	-11.1483	1.50411e-27	8.51435e-27	51.1388
LRRC73	1.12265	2.1285	11.1288	1.83501e-27	1.03636e-26	50.9416
RARRES2	-1.38353	6.00709	-11.1274	1.86101e-27	1.0507e-26	50.9277
GINS4	1.06723	2.20948	11.1195	2.0181e-27	1.13864e-26	50.8473
CDS1	1.0019	5.37412	11.1173	2.06332e-27	1.16339e-26	50.8253
THBD	-1.12317	4.57447	-11.1115	2.18752e-27	1.231e-26	50.7673
MYBPC1	-2.31997	1.77511	-11.1097	2.22803e-27	1.25338e-26	50.7492
PYCARD	1.3709	5.47304	11.102	2.41084e-27	1.35401e-26	50.6709
ITPKA	1.07496	1.2794	11.0919	2.67053e-27	1.49839e-26	50.5695
C4orf48	1.39567	3.78509	11.0901	2.71949e-27	1.52487e-26	50.5515
PODXL2	1.39528	5.80119	11.0823	2.94465e-27	1.6495e-26	50.4726
TCF7L1	-1.39112	4.37387	-11.0747	3.1792e-27	1.77741e-26	50.3966
NFAT5	-1.10365	3.18421	-11.0593	3.71511e-27	2.07231e-26	50.2421
SMC4	1.18136	4.42981	11.0546	3.89632e-27	2.17198e-26	50.1949
SLC1A3	-1.05992	3.24928	-11.0418	4.43784e-27	2.46904e-26	50.0658
STAC	-1.1748	1.36149	-11.0379	4.61704e-27	2.56542e-26	50.0266
CYBRD1	-1.57393	7.23438	-11.0259	5.20922e-27	2.88886e-26	49.9069
EFNB3	-1.32949	2.64929	-11.0144	5.85428e-27	3.24449e-26	49.7911
GABRP	-3.10541	4.04796	-11.0078	6.25596e-27	3.46041e-26	49.7253
TUB	-1.12663	2.65338	-10.9874	7.68554e-27	4.23889e-26	49.5213
FAM180A	-1.11119	2.23272	-10.9804	8.24522e-27	4.53883e-26	49.4516
FCER1A	-1.56749	2.76175	-10.9745	8.75096e-27	4.80799e-26	49.3925
DSCC1	1.05634	3.68559	10.971	9.06667e-27	4.97509e-26	49.3574
KLK8	-1.20619	0.806101	-10.9505	1.11362e-26	6.09899e-26	49.1536
FMOD	-1.61883	6.83474	-10.9437	1.19305e-26	6.52155e-26	49.0852
IL6R	-1.00899	3.21536	-10.9366	1.28026e-26	6.98939e-26	49.0153
CMTM7	-1.22142	4.19586	-10.9223	1.47847e-26	8.05867e-26	48.8726
HEY2	-1.37545	3.2287	-10.9167	1.56304e-26	8.51693e-26	48.8174
KCNK6	1.17908	4.75485	10.9142	1.60403e-26	8.73198e-26	48.7918
INHBB	-1.43064	5.02738	-10.9075	1.71539e-26	9.32636e-26	48.7252
LRRC46	1.23692	2.5692	10.889	2.06311e-26	1.11709e-25	48.5422
PM20D2	-1.41407	3.00813	-10.8823	2.20768e-26	1.19425e-25	48.4751
ID1	-1.14623	4.96876	-10.8813	2.22772e-26	1.20471e-25	48.4661
ARID5A	-1.09615	5.14342	-10.8718	2.45114e-26	1.32345e-25	48.3714
TWIST1	-1.26896	3.64994	-10.8691	2.51873e-26	1.35823e-25	48.3444
AIF1L	-1.50321	4.79659	-10.8675	2.55957e-26	1.37982e-25	48.3284
MANEAL	1.09261	3.19031	10.8668	2.57657e-26	1.38855e-25	48.3219
FNDC1	1.60766	4.64461	10.8623	2.69354e-26	1.45113e-25	48.2779
TTYH1	-1.57196	1.38033	-10.8596	2.76863e-26	1.49019e-25	48.2506
FGF10	-2.02787	2.27399	-10.857	2.84112e-26	1.52873e-25	48.225
MEX3A	1.5077	4.07102	10.8493	3.06791e-26	1.64869e-25	48.1489
H2BC7	1.40361	1.665	10.8437	3.24263e-26	1.7404e-25	48.0939
OASL	1.48712	3.56838	10.8206	4.08491e-26	2.18634e-25	47.865
EFNA3	1.31092	3.87722	10.8142	4.35304e-26	2.32767e-25	47.802
ELF5	-2.37825	2.93353	-10.8128	4.41149e-26	2.35746e-25	47.7888
LIMD2	1.12968	3.48351	10.7984	5.09204e-26	2.71607e-25	47.6466
BEND7	-1.14837	2.06757	-10.7968	5.1717e-26	2.75685e-25	47.6312
ADAMDEC1	1.74006	2.72286	10.7959	5.22038e-26	2.78194e-25	47.6219
IL1R1	-1.21701	5.03374	-10.7925	5.39687e-26	2.87421e-25	47.5889
ARC	-1.35027	1.47471	-10.7789	6.17719e-26	3.28164e-25	47.4551
PDGFRL	-1.29441	4.95543	-10.7776	6.2616e-26	3.32546e-25	47.4416
DSC3	-1.99964	2.47076	-10.7697	6.76725e-26	3.58957e-25	47.3646
SORBS2	-1.34691	3.22068	-10.7315	9.88582e-26	5.2228e-25	46.989
MROH6	1.19102	2.97931	10.7275	1.02788e-25	5.42707e-25	46.9503
SERPINF1	-1.22654	7.48665	-10.7271	1.03234e-25	5.44893e-25	46.946
ROPN1B	-1.54405	1.17066	-10.7263	1.04038e-25	5.48968e-25	46.9383
KLK4	1.4524	2.0635	10.7181	1.12779e-25	5.93999e-25	46.8584
GEM	-1.28942	5.06032	-10.6976	1.38088e-25	7.24859e-25	46.6577
KRT15	-2.59582	4.99959	-10.675	1.72506e-25	9.01945e-25	46.4371
ERRFI1	-1.08103	5.92146	-10.6646	1.91174e-25	9.9712e-25	46.3353
ZNF521	-1.21685	3.71378	-10.6611	1.97906e-25	1.03161e-24	46.301
MUCL1	-3.47443	3.99134	-10.6566	2.0675e-25	1.07682e-24	46.2577
SLAIN1	-1.16563	1.59732	-10.6544	2.11252e-25	1.09984e-24	46.2363
CTF1	-1.26164	3.5617	-10.6488	2.23183e-25	1.16125e-24	46.1819
SCGB3A1	-2.5191	2.87227	-10.6484	2.24164e-25	1.16601e-24	46.1775
ETV7	1.21591	2.92068	10.6443	2.33369e-25	1.21242e-24	46.1377
JCHAIN	-2.57252	7.04492	-10.6378	2.48658e-25	1.29029e-24	46.0748
TMC4	1.39105	6.55841	10.6376	2.4913e-25	1.29235e-24	46.0729
CYP7B1	-1.11413	3.33617	-10.6353	2.54789e-25	1.32051e-24	46.0506
GUCY1A1	-1.18275	3.66617	-10.6263	2.78291e-25	1.43798e-24	45.9632
PLN	-1.1515	2.4514	-10.6092	3.29373e-25	1.69937e-24	45.7962
MMP3	1.82217	3.81504	10.607	3.36461e-25	1.73542e-24	45.7751
RNF39	-1.27553	3.08448	-10.6069	3.36723e-25	1.73625e-24	45.7743
FAP	1.32411	3.89508	10.6064	3.38287e-25	1.74379e-24	45.7697
CLDN3	1.64722	7.0719	10.6042	3.45704e-25	1.78096e-24	45.7482
LPAR1	-1.02841	4.20936	-10.6025	3.51596e-25	1.81077e-24	45.7315
STEAP4	-1.78297	3.26133	-10.6001	3.59795e-25	1.85077e-24	45.7086
TFAP2A	1.11561	5.24639	10.5918	3.90379e-25	2.0057e-24	45.6278
OLFML2B	1.12268	5.84232	10.5851	4.16768e-25	2.13808e-24	45.563
CAMP	1.53893	1.83652	10.5749	4.60667e-25	2.36118e-24	45.4637
SCX	1.05558	1.76103	10.5729	4.69659e-25	2.40583e-24	45.4446
H2AC6	1.30362	7.28833	10.5715	4.75968e-25	2.43742e-24	45.4314
BSPRY	1.19016	6.06923	10.5668	4.98434e-25	2.54716e-24	45.3856
ZNF334	-1.08937	1.5796	-10.5626	5.19238e-25	2.65268e-24	45.3451
NOVA1	-1.72311	2.27402	-10.5625	5.19549e-25	2.65348e-24	45.3445
ZMYND10	1.61269	3.17705	10.5608	5.28558e-25	2.69869e-24	45.3275
NFIL3	-1.10578	5.19293	-10.5585	5.40193e-25	2.75564e-24	45.3059
CELSR3	1.12211	1.82528	10.5451	6.15729e-25	3.13631e-24	45.1762
MST1R	1.12968	3.53988	10.5429	6.29255e-25	3.20426e-24	45.1547
KLHL35	1.01328	2.19201	10.539	6.53838e-25	3.32845e-24	45.1167
LYNX1	-1.38439	3.01037	-10.5377	6.61824e-25	3.36811e-24	45.1047
CIB3	1.10928	1.44966	10.474	1.22931e-24	6.20104e-24	44.4912
[truncated: 403 more rows]
